# Supplementary material for: Pleiotropic effects of trisomy and pharmacologic modulation on structural, functional, molecular, and genetic systems in a Down syndrome mouse model
Source: eLife. 2024 Mar 18;12:RP89763. doi: 10.7554/eLife.89763 (PMC10948151; doi:10.7554/eLife.89763)
Supplement: Supplementary file 1. — (a) Sample size for each analysis, experiment, and developmental stage. Differences in sample size between stages are due to technical reasons such as micro-CT or MR scanner not operating on the scanning day, movement scanning artifacts, or mouse death during the experiment. For the tibia microarchitecture, differences in sample size are due to mice detected as outliers. For the MRS, differences in sample size are due to signal artifacts. For the adult cognitive tests, differences in sample size are due to artifacts during tracking. (b) Table showing the most concentrated metabolites contributing to the respective spectral regions in MRS. ala – alanine, arg – arginine, cre – creatine, cys – cysteine, Hα of AA – α hydrogen of amino acids, ile – iso leucine, leu – leucine, lys – lysine, gaba – γ-amino butyrate, gln – glutamine, glu – glutamane, gly – glycine, GPC – glycerol phosphocholine, his – histidine, NAA – N-acetyl aspartate, PChol – phosphocholine, PCr – phosphocreatine,tyr – tyrosine, val – valine. Figure showing MR spectra and integrated spectral regions for multivariate MRS analysis. The region from 0 to 4.3 ppm of a representative MR spectrum is shown. Regions 11 and 12, representing contaminations from macromolecules, were not included in the analysis as they showed large variability. (c) Litter information. For each mouse, the litter number, genotype, treatment received and sex are provided. (d) µCT scanning parameters used at each stage. (e) Table and figure showing the anatomical definition of craniofacial landmarks. N/A indicates that the landmarks were not acquired at this stage. (A) Set of 34 landmarks characterizing craniofacial shape at µCT1 from a 3D reconstruction of a µCT scan. (B) Set of 27 landmarks characterizing craniofacial shape at µCT2, µCT3 and µCT4 from a 3D reconstruction of a µCT scan. (f) Trabecular bone parameters measured from ex vivo micro-CT images at 8 M. (g) Cortical bone parameters measured from ex vivo micro-CT images at 8 M. [file elife-89763-supp1.xlsx]

## Sheet: Supplementary File 1a
	WT		TS		WT Treated		TS Treated
	Female	Male	Female	Male	Female	Male	Female	Male
BW1	11	7	11	7	13	10	14	8
BW2	7	3	5	3	7	10	11	7
BW3	5	2	5	2	7	10	9	7
µCT1	11	7	10	7	9	13	8	8
µCT2	8	5	6	4	10	9	9	7
µCT3	8	3	6	2	8	10	11	7
µCT4	6	3	6	2	7	10	11	7
BMD humerus µCT1	11	7	10	7	9	13	14	8
BMD humerus µCT2	4	5	6	4	9	9	11	7
BMD humerus µCT3	8	3	6	2	7	10	11	7
BMD humerus µCT4	5	4	6	2	8	8	11	7
Tibia length	6	3	6	2	7	10	11	7
Percentage Bone Volume	6	2	6	2	7	10	11	7
Trabecular Thickness	6	3	6	2	7	10	11	7
Trabecular Separation	6	3	6	2	7	10	11	7
Trabecular Number	6	3	6	2	7	10	11	7
Cross Sectional Area	6	3	6	2	7	10	11	7
Periosteal Perimeter	6	3	6	2	7	10	11	7
Endocortical Perimeter	6	3	6	2	7	10	11	7
Bone Area	6	3	6	2	7	10	11	7
Medullary Area	6	3	6	2	7	10	11	7
Cortical Thickness	6	3	6	2	7	10	11	7
Cortical Porosity	6	3	6	2	7	9	10	7
Polar Moment Of Inertia	6	3	6	2	7	10	11	7
BMD	6	3	6	2	7	10	11	7
Cortical bone mineral density	6	3	6	2	7	9	11	7
Whole Brain (MRI1)	7	4	6	3	7	10	11	7
Hippocampus (MRI1)	7	4	6	3	7	10	11	6
Cerebellum (MRI1)	7	4	6	3	7	10	11	7
Lateral Ventricles (MRI1)	7	4	6	3	7	10	11	7
Third Ventricle (MRI1)	7	4	6	3	7	10	11	7
Fourth Ventricle (MRI1)	7	4	6	3	7	10	11	7
Cerebral Aqueduct (MRI1)	7	4	6	3	7	10	11	7
Whole Ventricles (MRI1)	7	4	6	3	7	10	11	7
Whole Brain (MRI2)	6	3	6	2	7	10	11	7
Hippocampus (MRI2)	6	3	6	2	7	10	11	7
Cerebellum (MRI2)	6	3	6	2	7	10	11	7
Lateral Ventricles (MRI2)	6	3	6	2	6	10	11	7
Third Ventricle (MRI2)	6	3	6	2	7	10	11	7
Fourth Ventricle (MRI2)	6	3	6	2	6	10	11	7
Cerebral Aqueduct (MRI2)	6	3	6	2	7	10	11	7
Whole Ventricles (MRI2)	6	3	6	2	7	10	11	7
Eye Opening	9	5	6	7	10	10	12	8
Vibrissae	9	5	6	7	10	10	12	8
Blast	9	5	6	7	10	10	12	8
Cliff	9	5	6	7	10	10	12	8
Incisor	5	3	2	3	10	7	7	2
Righting	9	6	7	8	10	11	11	8
Negative Geotaxis	9	5	6	6	10	10	11	8
Climbing	8	5	6	6	9	10	11	4
Grasping	6	4	8	9	10	9	12	8
Tactile	9	5	6	6	10	10	12	8
Reaching	9	5	6	7	10	10	11	7
Visual	9	5	6	7	10	10	12	8
Preyer	9	5	6	7	10	10	12	8
Pinna	11	7	9	9	10	13	14	8
Walking	5	4	4	5	6	6	8	7
Homing	6	5	6	6	10	10	12	8
Pivoting	9	5	6	7	10	10	12	8
Nursing	N/A	N/A	6	0	N/A	N/A	7	0
Pup licking	N/A	N/A	6	0	N/A	N/A	7	0
Digging in nest	N/A	N/A	6	0	N/A	N/A	7	0
Eating	N/A	N/A	6	0	N/A	N/A	7	0
Drinking	N/A	N/A	6	0	N/A	N/A	7	0
Moving	N/A	N/A	6	0	N/A	N/A	7	0
Digging off nest	N/A	N/A	6	0	N/A	N/A	7	0
OF: Time in center (Cog1)	8	4	7	3	9	10	11	7
OF: Time in periphery (Cog1)	8	4	7	3	9	10	11	7
NOR: Time in center hab (Cog1)	8	4	7	3	9	10	11	7
EPM: % open arm (Cog1)	7	4	7	3	8	10	9	7
OF: Distance (Cog1)	8	3	7	3	9	10	11	7
OF: Speed (Cog1)	7	4	7	3	9	10	11	7
SPSN: Distance hab (Cog1)	8	4	7	3	9	10	11	7
SPSN: Speed hab (Cog1)	8	4	7	3	9	10	11	7
NOR: Distance hab (Cog1)	8	4	7	3	9	10	11	7
NOR: Speed hab (Cog1)	8	4	6	3	9	10	11	7
NOR: Preference for NOV (Cog1)	7	3	7	3	7	10	8	7
SPSN: Preference for S2 (Cog1)	7	3	7	3	7	10	8	7
PA: Latency train (Cog1)	8	4	5	3	8	10	10	6
PA: Latency test (Cog1)	8	4	7	3	8	10	11	7
OF: Time in center (Cog2)	6	2	5	2	7	10	11	7
OF: Time in periphery (Cog2)	6	2	6	2	7	10	11	7
NOR: Time in center hab (Cog2)	6	2	6	2	7	10	11	7
EPM: % open arm (Cog2)	6	2	6	2	7	10	11	7
OF: Distance (Cog2)	6	2	6	2	7	9	11	7
OF: Speed (Cog2)	6	2	6	2	7	9	11	7
SPSN: Distance hab (Cog2)	6	2	6	2	7	10	11	7
SPSN: Speed hab (Cog2)	6	2	6	2	7	10	11	7
NOR: Distance hab (Cog2)	6	2	6	2	7	9	11	7
NOR: Speed hab (Cog2)	6	2	6	2	7	9	11	7
NOR: Preference for NOV (Cog2)	4	2	4	2	7	10	11	7
SPSN: Preference for S2 (Cog2)	4	2	4	2	7	10	11	7
PA: Latency train (Cog2)	6	2	6	2	7	10	10	5
PA: Latency test (Cog2)	6	2	6	2	5	7	11	7
NAA (MRS1)	8	4	6	3	7	10	9	6
Cr/PCr (MRS1)	8	4	6	3	7	10	9	6
Chol/Pchol/GPC (MRS1)	8	4	6	3	7	10	9	6
myo-Inos (MRS1)	7	4	5	3	5	9	9	6
Tau (MRS1)	7	4	6	3	7	10	9	6
NAA (MRS2)	8	4	6	3	7	10	10	7
Cr/PCr (MRS2)	8	4	6	3	7	10	10	7
Chol/Pchol/GPC (MRS2)	8	4	6	3	7	10	10	7
myo-Inos (MRS2)	8	4	6	3	7	10	10	7
Tau (MRS2)	8	4	6	3	7	10	10	7
RNAseq	6	3	6	2	7	10	11	7

## Sheet: Supplementary File 1b
Region number	Metabolite name	Integration Range [ppm]
1	lactate, myo-inositol	4.00 –4.20
2	glucose, Hα of AA, cre, PCr	3.81 – 4.00
3	myo-inositol, glucose, Hα of AA	3.68 – 3.79
4	myo-inositol, gly, glucose	3.45 – 3.62
5	taurine, glucose	3.30 – 3.45
6	PChol, GPC, choline, taurine	3.19 – 3.30
7	cre, PCr, lys, his, cys, tyr	2.91 – 3.10
8	gln, glu, NAA, val, pro	2.18 – 2.45
9	gln, glu, NAA, lys, gaba	1.88 – 2.18
10	ala, leu, lys, arg	1.45 – 1.70
11	lipids, lactate	1.25 – 1.38
12	lipids, ile, leu, val	0.70 – 0.98

## Sheet: Supplementary File 1c
Mouse number	Litter	Genotype	Treatment	Sex
1	1	TS	Not treated	F
2	1	WT	Not treated	F
3	1	WT	Not treated	M
4	1	TS	Not treated	M
5	1	WT	Not treated	M
6	1	TS	Not treated	F
7	2	TS	Not treated	M
8	2	TS	Not treated	F
9	2	TS	Not treated	M
10	2	TS	Not treated	F
11	3	TS	Not treated	M
12	3	WT	Not treated	F
13	4	WT	Not treated	M
14	4	TS	Not treated	F
15	4	WT	Not treated	F
16	4	WT	Not treated	M
17	4	TS	Not treated	F
18	4	TS	Not treated	F
19	5	WT	Not treated	F
20	5	WT	Not treated	F
21	5	WT	Not treated	F
22	5	WT	Not treated	F
23	6	WT	Not treated	F
24	6	WT	Not treated	M
25	6	TS	Not treated	M
26	6	WT	Not treated	M
27	6	TS	Not treated	F
28	6	TS	Not treated	M
29	6	TS	Not treated	M
30	7	WT	0.09 mg EGCG/mL	F
31	7	WT	0.09 mg EGCG/mL	M
32	7	WT	0.09 mg EGCG/mL	F
33	7	WT	0.09 mg EGCG/mL	M
34	7	TS	0.09 mg EGCG/mL	M
35	7	TS	0.09 mg EGCG/mL	F
36	8	TS	0.09 mg EGCG/mL	F
37	8	WT	0.09 mg EGCG/mL	F
38	8	WT	0.09 mg EGCG/mL	F
39	8	WT	0.09 mg EGCG/mL	M
40	9	TS	0.09 mg EGCG/mL	M
41	9	WT	0.09 mg EGCG/mL	M
42	9	TS	0.09 mg EGCG/mL	F
43	9	TS	0.09 mg EGCG/mL	F
44	9	TS	0.09 mg EGCG/mL	F
45	9	TS	0.09 mg EGCG/mL	F
46	10	TS	0.09 mg EGCG/mL	F
47	10	WT	0.09 mg EGCG/mL	F
48	10	WT	0.09 mg EGCG/mL	M
49	10	TS	0.09 mg EGCG/mL	M
50	10	WT	0.09 mg EGCG/mL	F
51	10	TS	0.09 mg EGCG/mL	F
52	10	TS	0.09 mg EGCG/mL	F
53	11	WT	0.09 mg EGCG/mL	M
54	11	WT	0.09 mg EGCG/mL	M
55	11	WT	0.09 mg EGCG/mL	F
56	11	WT	0.09 mg EGCG/mL	M
57	11	WT	0.09 mg EGCG/mL	M
58	11	TS	0.09 mg EGCG/mL	M
59	11	TS	0.09 mg EGCG/mL	F
60	12	TS	0.09 mg EGCG/mL	M
61	12	TS	0.09 mg EGCG/mL	M
62	12	WT	0.09 mg EGCG/mL	F
63	12	TS	0.09 mg EGCG/mL	M
64	12	TS	0.09 mg EGCG/mL	F
65	13	TS	0.09 mg EGCG/mL	F
66	13	WT	0.09 mg EGCG/mL	F
67	13	WT	0.09 mg EGCG/mL	F
68	13	WT	0.09 mg EGCG/mL	M
69	13	TS	0.09 mg EGCG/mL	F
70	13	TS	0.09 mg EGCG/mL	M
71	13	TS	0.09 mg EGCG/mL	M

## Sheet: Supplementary File 1d
Stage	Source energy (Kv)	Filter	Current (µA)	Exposure time (ms)	Averages	Step increment (˚)	Total angle (˚)	Time	Voxel size (µm3)
µCT1	35	Al 0.5 mm	500	180	3	1	180º	3 min	51.7
µCT2-4	55	Al 1 mm	700	80	2	1	360º	3 min	51.7
Tibia (ex vivo)	60	Al 0.5 mm	80	3000	0	0.4	180º	23 min	5

## Sheet: Supplementary File 1e
Landmark number at µCT1	Landmark number at µCT2, µCT3 and µCT4	Anatomical definition
1	1	Tip of the nasal bone
N/A	2	Intersection of nasal and frontal bones
N/A	3	Intersection of frontal and parietal bones
N/A	4	Intersection of parietal and interparietal bones
N/A	5	Intersection of interparietal and occipital bones
13	6	Anterior-most point on intersection of premaxillae and nasal bones (left)
14	7	Center of alveolar ridge over maxillary incisor (left)
15	8	Most inferior point on premaxilla-maxilla suture (left)
16	9	Anterior notch on frontal process lateral to infraorbital fissure (left)
17	10	Intersection of frontal process of maxilla with frontal and lacrimal bones (left)
18	11	Intersection of zygomatic process of maxilla with zygoma (left)
19	12	Frontal-squamosal intersection at temporal crest (left)
20	13	Intersection of maxilla and sphenoid on inferior alveolar (left)
21	14	Intersection of zygoma with zygomatic process of temporal (left)
N/A	15	Intersection of squamosal body to zygomatic process of squamosal (left)
N/A	16	Intersection of parietal, temporal and occipital bones (left)
24	17	Anterior-most point on intersection of premaxillae and nasal bones (right)
25	18	Center of alveolar ridge over maxillary incisor (right)
26	19	Most inferior point on premaxilla-maxilla suture (right)
27	20	Anterior notch on frontal process lateral to infraorbital fissure (right)
28	21	Intersection of frontal process of maxilla with frontal and lacrimal bones (right)
29	22	Intersection of zygomatic process of maxilla with zygoma (right)
30	23	Frontal-squamosal intersection at temporal crest (right)
31	24	Intersection of maxilla and sphenoid on inferior alveolar (right)
32	25	Intersection of zygoma with zygomatic process of temporal (right)
N/A	26	Intersection of squamosal body to zygomatic process of squamosal (right)
N/A	27	Intersection of parietal, temporal and occipital bones (right)
2	N/A	Posterior-most point on the nasal bone at the midline
3	N/A	Anterior-most point on the frontal bone at the midline (left)
4	N/A	Anterior-most point on the frontal bone at the midline (right)
5	N/A	Posterior-most point on the frontal bone at the midline (left)
6	N/A	Posterior-most point on the frontal bone at the midline (right)
7	N/A	Anterior-most point on the parietal bone at the midline (left)
8	N/A	Anterior-most point on the parietal bone at the midline (right)
9	N/A	Maximum curvature point on the posterior part of the parietal bone (left)
10	N/A	Maximum curvature point on the posterior part of the parietal bone (right)
11	N/A	Anterior-most point on the interparietal bone at the midline
12	N/A	Anterior-most point on the occipital bone at the midline
22	N/A	Joining of squamosal body to zygomatic process of squamosal (left)
23	N/A	Tip of the post-tympanic hook (left)
33	N/A	Joining of squamosal body to zygomatic process of squamosal (right)
34	N/A	Tip of the post-tympanic hook (right)

## Sheet: Supplementary File 1f
Parameter	Abbreviation	Description	Unit
Percentage bone volume	BV/TV	Ratio of bone volume to total volume inside the Region of interest	%
Trabecular number	Tb.N	Average number of trabeculae per length unit of bone	1/mm
Trabecular thickness	Tb.Th	Average thickness of the trabecular bone	mm
Trabecular separation	Tb.Sp	Average distance between the trabecular bone	mm
Bone mineral density	BMD	Volumetric density of hydroxyapatite in the trabecular bone	g/cm³

## Sheet: Supplementary File 1g
Parameter	Abbreviation	Description	Unit
Cross sectional area	Tt.Ar	Total area inside the periosteal perimeter	mm²
Periosteal perimeter	Ps.Pm	Perimeter around the outside of the bone	mm
Endosteal perimeter	Ec.Pm	Perimeter around the medullary canal, inside the cortical bone	mm
Bone area	Ct.Ar	Volume of the cortical bone	mm²
Medullary area	Ma.Ar	Area of the medullary or bone marrow canal	mm²
Cortical thickness	Ct.Th	Average thickness of the cortical bone	mm
Porosity	Ct.Po	Ratio of pore volume over the total volume of cortical bone	%
Polar moment of inertia	J	Resistance against torsion	mm4
Cortical bone mineral density	Ct. BMD	Mineral density of the cortical bone	g/cm³

## Sheet: Supplementary File 1h
	Parameter	Normal according to Shapiro-Wilk?	Equal SD according to F-test?	Test performed
Body growth	BW2	No	No	K-S
	BW3	No	No	K-S
Bone mineral density	BMD humerus µCT1	Yes	No	Welch's T-test
	BMD humerus µCT2	No	No	K-S
	BMD humerus µCT3	No	No	K-S
	BMD humerus µCT4	Yes	Yes	Welch's T-test
Tibia microarchitecture	Tibia length	Yes	Yes	Welch's T-test
	Percentage Bone Volume	No	No	K-S
	Trabecular Thickness	No	Yes	M-W
	Trabecular Separation	No	Yes	M-W
	Trabecular Number	No	No	K-S
	Cross Sectional Area	Yes	No	Welch's T-test
	Periosteal Perimeter	Yes	Yes	Welch's T-test
	Endocortical Perimeter	No	No	K-S
	Bone Area	Yes	No	Welch's T-test
	Medullary Area	Yes	No	Welch's T-test
	Cortical Thickness	Yes	Yes	Welch's T-test
	Cortical Porosity	No	No	K-S
	Polar Moment Of Inertia	No	No	K-S
	BMD	Yes	No	Welch's T-test
	Cortical bone mineral density	No	No	K-S
Brain volumes	Whole Brain (MRI1)	Yes	No	Welch's T-test
	hippocampal region (MRI1)	Yes	No	Welch's T-test
	Cerebellum (MRI1)	Yes	No	Welch's T-test
	Lateral Ventricles (MRI1)	Yes	No	Welch's T-test
	Third Ventricle (MRI1)	Yes	No	Welch's T-test
	Fourth Ventricle (MRI1)	Yes	No	Welch's T-test
	Cerebral Aqueduct (MRI1)	Yes	No	Welch's T-test
	Whole Ventricles (MRI1)	Yes	No	Welch's T-test
	Whole Brain (MRI2)	Yes	Yes	Welch's T-test
	hippocampal region (MRI2)	No	Yes	M-W
	Cerebellum (MRI2)	Yes	No	Welch's T-test
	Lateral Ventricles (MRI2)	No	No	K-S
	Third Ventricle (MRI2)	Yes	No	Welch's T-test
	Fourth Ventricle (MRI2)	No	No	K-S
	Cerebral Aqueduct (MRI2)	Yes	Yes	Welch's T-test
	Whole Ventricles (MRI2)	No	Yes	M-W
Neurodevelopmental tests	Eye Opening	No	No	K-S
	Vibrissae	No	No	K-S
	Blast	No	No	K-S
	Cliff	No	Yes	M-W
	Incisor	No	Yes	M-W
	Righting	Yes	Yes	Welch's T-test
	Negative Geotaxis	No	Yes	M-W
	Climbing	No	Yes	M-W
	Grasping	No	Yes	M-W
	Tactile	No	No	K-S
	Reaching	No	No	K-S
	Visual	No	Yes	M-W
	Preyer	No	No	K-S
	Pinna	No	Yes	M-W
	Walking	No	Yes	M-W
Maternal behavior tests	Nursing	No	No	K-S
	Pup licking	Yes	Yes	Welch's T-test
	Digging in nest	Yes	Yes	Welch's T-test
	Eating	Yes	Yes	Welch's T-test
	Drinking	Yes	Yes	Welch's T-test
	Moving	No	No	K-S
	Digging off nest	No	Yes	M-W
Adult cognitive tests	OF: Time in center (Cog1)	Yes	Yes	Welch's T-test
	OF: Time in periphery (Cog1)	No	No	K-S
	NOR: Time in center hab (Cog1)	Yes	Yes	Welch's T-test
	EPM: % open arm (Cog1)	Yes	No	Welch's T-test
	OF: Distance (Cog1)	Yes	No	Welch's T-test
	OF: Speed (Cog1)	Yes	No	Welch's T-test
	SPSN: Distance hab (Cog1)	Yes	No	Welch's T-test
	SPSN: Speed hab (Cog1)	No	No	K-S
	NOR: Distance hab (Cog1)	No	No	K-S
	NOR: Speed hab (Cog1)	Yes	No	Welch's T-test
	NOR: Preference for NOV (Cog1)	No	Yes	M-W
	SPSN: Preference for S2 (Cog1)	No	Yes	M-W
	PA: Latency train (Cog1)	No	No	K-S
	PA: Latency test (Cog1)	No	No	K-S
	OF: Time in center (Cog2)	No	No	K-S
	OF: Time in periphery (Cog2)	Yes	No	Welch's T-test
	NOR: Time in center hab (Cog2)	No	No	K-S
	EPM: % open arm (Cog2)	Yes	Yes	Welch's T-test
	OF: Distance (Cog2)	Yes	No	Welch's T-test
	OF: Speed (Cog2)	Yes	No	Welch's T-test
	SPSN: Distance hab (Cog2)	Yes	No	Welch's T-test
	SPSN: Speed hab (Cog2)	Yes	No	Welch's T-test
	NOR: Distance hab (Cog2)	Yes	No	Welch's T-test
	NOR: Speed hab (Cog2)	Yes	No	Welch's T-test
	NOR: Preference for NOV (Cog2)	Yes	No	Welch's T-test
	SPSN: Preference for S2 (Cog2)	No	Yes	M-W
	PA: Latency train (Cog2)	No	No	K-S
	PA: Latency test (Cog2)	No	No	K-S
Hippocampal metabolites	NAA (MRS1)	Yes	Yes	Welch's T-test
	Cr+PCr (MRS1)	Yes	No	Welch's T-test
	Chol+Pchol+GPC (MRS1)	Yes	Yes	Welch's T-test
	myo-Inos (MRS1)	Yes	Yes	Welch's T-test
	Tau (MRS1)	Yes	Yes	Welch's T-test
	NAA (MRS2)	No	Yes	M-W
	Cr+PCr (MRS2)	Yes	Yes	Welch's T-test
	Chol+Pchol+GPC (MRS2)	Yes	Yes	Welch's T-test
	myo-Inos (MRS2)	Yes	Yes	Welch's T-test
	Tau (MRS2)	Yes	Yes	Welch's T-test

## Sheet: Supplementary File 1i
Skull Shape	x y z coordinate for each landmark in Supplementary Figure S1
Tibia Microarchitecture	Ct.Th	Ct.Po	J	Ct. BMD	BV/TV	Tb.Th	Tb.Sp	BMD	Tt.Ar	Ct.Ar	Ps.Pm	Ec.Pm	Bone length
Brain Volumes MRI1 and MRI2	Hippocampus/BW	Cerebellum/BW	Lateral Ventricles/BW	Third Ventricle/BW	Fourth Ventricle/BW	Cerebral Aqueduct/BW
Neurodevelopment	Grasping	Tactile	Vibrissae	Reaching	Preyer	Blast	Visual	Righting	Geotax	Climbing	Cliff	Walking	Eye	Incisor	Pinna
Adult Cognition Cog.1 and Cog.2	OF: Time in center	NOR: Time in center (hab)	EPM: % open arm	OF: Distance	SPSN: Distance (hab)	NOR: Distance (hab)	NOR: Preference for NOV	SPSN: Preference for S2	PA: Latency (train)	PA: Latency (test)
MRS1 and MRS2	Myo_(1)	Cre_(2)	Glx_(3)	Myo_(4)	Tau_(5)	Cho_(6)	Cre_(7)	Glu_(8)	Naa_(9)	Ala_(10)
RNAseq	ATP5J	PRR18	CBR1	RNASET2B	DSCAM	PIGP	CLIC6	TULP4	MRPL39	OLIG2	KCNE2	OLIG1	SFT2D1	SOD1	ADAMTS1	TIAM1	MRPS6	ETS2	RSPH3A	PRDM15	TIAM2	BACH1	URB1	GM12166	APP	CYYR1	PDE10A	RNASET2A	ZDHHC14	PCP4	TMEM181A	JAM2	LCA5L	CCR6	RUNX1	CBR3	IFNGR2	TAGAP1	HUNK	B3GALT5	TMEM181B-PS	PSMG1	RCAN1	DNAJC28	IL10RB	EZR	GABPA	TAGAP	ADAMTS5
[truncated: 76 more columns]
