# Supplementary material for: Pleiotropic effects of trisomy and pharmacologic modulation on structural, functional, molecular, and genetic systems in a Down syndrome mouse model
Source: eLife. 2024 Mar 18;12:RP89763. doi: 10.7554/eLife.89763 (PMC10948151; doi:10.7554/eLife.89763)
Supplement: Supplementary file 2. — (a) P-values resulting from permutation tests (10,000 permutation rounds) based on Procrustes distances among groups for craniofacial shape. Bold font indicates statistically significant values. Pairwise comparisons marked as N/A were not calculated since they did not evaluate any relevant scientific question. (b) P-values resulting from the mixed-effects analysis and pairwise tests for humerus BMD. Bold font indicates statistically significant values after Benjamini–Hochberg correction. Pairwise comparisons marked as N/A were not calculated since they did not evaluate any relevant scientific question. (C) P-values resulting from the pairwise tests after a one-way PERMANOVA (9,999 permutation rounds) based on Mahalanobis distances for tibia microarchitecture parameters. Bold font indicates statistically significant values. Pairwise comparisons marked as N/A were not calculated since they did not evaluate any relevant scientific question. (d) P-values resulting from the pairwise tests after a one-way PERMANOVA (9,999 permutation rounds) based on Mahalanobis distances for brain volumes before treatment discontinuation. Bold font indicates statistically significant values. Pairwise comparisons marked as N/A were not calculated since they did not evaluate any relevant scientific question. (e) P-values resulting from the pairwise tests after a one-way PERMANOVA (9,999 permutation rounds) based on Mahalanobis distances for brain volumes after treatment discontinuation. Bold font indicates statistically significant values. Pairwise comparisons marked as N/A were not calculated since they did not evaluate any relevant scientific question. (f) P-values resulting from the pairwise tests after a one-way PERMANOVA (9,999 permutation rounds) based on Mahalanobis distances for early neurodevelopmental tests. Bold font indicates statistically significant values. Pairwise comparisons marked as N/A were not calculated since they did not evaluate any relevant scientific question. (g) [file elife-89763-supp2.xlsx]

## Sheet: Supplementary File 2a
µCT1	TS Treated	TS Untreated	WT Treated
TS Untreated	0.0005
WT Treated	<0.0001	N/A
WT Untreated	<0.0001	<0.0001	0.0418
µCT2	TS Treated	TS Untreated	WT Treated
TS Untreated	0.3358
WT Treated	<0.0001	N/A
WT Untreated	<0.0001	0.0011	0.2719
µCT3	TS Treated	TS Untreated	WT Treated
TS Untreated	0.1237
WT Treated	<0.0001	N/A
WT Untreated	<0.0001	0.0009	0.6242
µCT4	TS Treated	TS Untreated	WT Treated
TS Untreated	0.2151
WT Treated	<0.0001	N/A
WT Untreated	<0.0001	0.0055	0.559

## Sheet: Supplementary File 2b
Mixed-effects analysis	TS Treated	TS Untreated	WT Treated
TS Untreated	0.0023
WT Treated	0.032	N/A
WT Untreated	<0.0001	0.2397	<0.0001
µCT1	TS Treated	TS Untreated	WT Treated
TS Untreated	0.0897
WT Treated	0.0002	N/A
WT Untreated	0.0225	0.6717	0.3034
µCT2	TS Treated	TS Untreated	WT Treated
TS Untreated	0.5168
WT Treated	0.491	N/A
WT Untreated	0.0996	0.4346	0.3243
µCT3	TS Treated	TS Untreated	WT Treated
TS Untreated	0.3721
WT Treated	0.5098	N/A
WT Untreated	0.2033	0.9097	0.0735
µCT4	TS Treated	TS Untreated	WT Treated
TS Untreated	0.0573
WT Treated	0.2961	N/A
WT Untreated	0.0002	0.043	0.0001

## Sheet: Supplementary File 2c
ALL TESTS	TS Treated	TS Untreated	WT Treated
TS Untreated	0.0001
WT Treated	0.0002	N/A
WT Untreated	0.0008	0.5589	0.0089
TRABECULAR BONE	TS Treated	TS Untreated	WT Treated
TS Untreated	0.7034
WT Treated	0.0792	N/A
WT Untreated	0.8793	0.8944	0.5405
CORTICAL BONE STRENGTH	TS Treated	TS Untreated	WT Treated
TS Untreated	0.0001
WT Treated	0.0005	N/A
WT Untreated	0.0002	0.4536	0.0563
CORTICAL BONE SIZE	TS Treated	TS Untreated	WT Treated
TS Untreated	0.0011
WT Treated	0.0003	N/A
WT Untreated	0.0007	0.0975	0.3042

## Sheet: Supplementary File 2d
ALL TESTS	TS Treated	TS Untreated	WT Treated
TS Untreated	0.4921
WT Treated	0.0008	N/A
WT Untreated	0.0047	0.1064	0.4467

## Sheet: Supplementary File 2e
ALL TESTS	TS Treated	TS Untreated	WT Treated
TS Untreated	0.0472
WT Treated	0.0001	N/A
WT Untreated	0.0609	0.0065	0.2808

## Sheet: Supplementary File 2f
ALL TESTS	TS Treated	TS Untreated	WT Treated
TS Untreated	0.0001
WT Treated	0.0014	N/A
WT Untreated	0.0001	0.0001	0.1252
DEV. LANDMARKS	TS Treated	TS Untreated	WT Treated
TS Untreated	0.0557
WT Treated	0.0163	N/A
WT Untreated	0.0181	0.825	0.3925
NEUROMOTOR	TS Treated	TS Untreated	WT Treated
TS Untreated	0.0065
WT Treated	0.0002	N/A
WT Untreated	0.0025	0.0555	0.3376
REFLEXES	TS Treated	TS Untreated	WT Treated
TS Untreated	0.1642
WT Treated	0.0001	N/A
WT Untreated	0.0001	0.0423	0.0001

## Sheet: Supplementary File 2g
ALL TESTS	TS Treated	TS Untreated	WT Treated
TS Untreated	0.1792
WT Treated	0.0507	N/A
WT Untreated	0.0001	0.0125	0.005
ANXIETY TESTS	TS Treated	TS Untreated	WT Treated
TS Untreated	0.8212
WT Treated	0.3742	N/A
WT Untreated	0.0006	0.1153	0.0035
AROUSAL TESTS	TS Treated	TS Untreated	WT Treated
TS Untreated	0.0337
WT Treated	0.0017	N/A
WT Untreated	0.0001	0.0028	0.0004
MEMORY TESTS	TS Treated	TS Untreated	WT Treated
TS Untreated	0.2468
WT Treated	0.0353	N/A
WT Untreated	0.0668	0.4824	0.4809

## Sheet: Supplementary File 2h
ALL TESTS	TS Treated	TS Untreated	WT Treated
TS Untreated	0.4048
WT Treated	0.055	N/A
WT Untreated	0.0018	0.4596	0.0004
ANXIETY TESTS	TS Treated	TS Untreated	WT Treated
TS Untreated	0.297
WT Treated	0.1914	N/A
WT Untreated	0.0417	0.2898	0.0386
AROUSAL TESTS	TS Treated	TS Untreated	WT Treated
TS Untreated	0.1554
WT Treated	0.026	N/A
WT Untreated	0.0019	0.5638	0.0085
MEMORY TESTS	TS Treated	TS Untreated	WT Treated
TS Untreated	0.3038
WT Treated	0.2073	N/A
WT Untreated	0.0087	0.2218	0.0089

## Sheet: Supplementary File 2i
ALL TESTS	TS Treated	TS Untreated	WT Treated
TS Untreated	0.0361
WT Treated	0.0163	N/A
WT Untreated	0.0496	0.0136	0.4779

## Sheet: Supplementary File 2j
ALL TESTS	TS Treated	TS Untreated	WT Treated
TS Untreated	0.2111
WT Treated	0.0295	N/A
WT Untreated	0.0347	0.579	0.5859

[truncated: 1 more sheets: Supplementary File 2k]
