# Supplementary material for: Pleiotropic effects of trisomy and pharmacologic modulation on structural, functional, molecular, and genetic systems in a Down syndrome mouse model
Source: eLife. 2024 Mar 18;12:RP89763. doi: 10.7554/eLife.89763 (PMC10948151; doi:10.7554/eLife.89763)
Supplement: Supplementary file 3. [file elife-89763-supp3.xlsx]

## Sheet: WT_U_vs_TS_U
Gene	baseMean	log2FoldChange	lfcSE	stat	pvalue	padj
Cct8	692.258	0.499575	0.0832045	6.00418	1.92e-09	9.68e-06
Son	4334.38	0.583623	0.0967661	6.03128	1.63e-09	9.68e-06
Ttc3	10020.1	0.424512	0.0787429	5.39112	7e-08	0.000234959
App	3935.39	0.696682	0.147175	4.73368	2.2e-06	0.00369932
Hmgn1	346.621	0.690047	0.143984	4.79253	1.65e-06	0.00369932
Synj1	1643.61	0.505932	0.10658	4.74699	2.06e-06	0.00369932
Atp5o	1203.85	0.50784	0.108046	4.70023	2.6e-06	0.00373725
Hlcs	63.2664	0.840751	0.189946	4.42626	9.59e-06	0.0107247
Tmem50b	294.401	0.532708	0.119721	4.44956	8.6e-06	0.0107247
Cryzl1	275.845	0.591231	0.136961	4.31679	1.58e-05	0.0159377
Jam2	96.5365	0.803351	0.190973	4.20663	2.59e-05	0.0237225
Dyrk1a	533.708	0.467971	0.114741	4.07849	4.53e-05	0.0380277
Paxbp1	478.931	0.532071	0.13311	3.99724	6.41e-05	0.0473712
Tiam1	675.834	0.535129	0.134094	3.9907	6.59e-05	0.0473712
Brwd1	596.86	0.500928	0.126739	3.95244	7.74e-05	0.0519185
Dscr3	69.7838	0.740125	0.19053	3.88455	0.000102519	0.0607095
Rnaset2a	33.3016	1.0157	0.261178	3.88894	0.000100683	0.0607095
Adamts1	130.985	0.614821	0.166496	3.6927	0.000221882	0.0995792
Ccdc23	34.0136	0.965064	0.258991	3.72625	0.000194349	0.0995792
Ezr	121.649	0.589875	0.16012	3.68397	0.000229631	0.0995792
N6amt1	232.74	0.549878	0.149607	3.67548	0.0002374	0.0995792
Tmem242	259.736	0.524691	0.142447	3.68342	0.00023013	0.0995792
Tulp4	1773.87	0.531763	0.144357	3.68366	0.000229908	0.0995792
Usp16	380.237	0.470027	0.127856	3.67622	0.000236718	0.0995792
Gart	104.637	0.614203	0.168139	3.65296	0.000259235	0.104389
Ndst3	316.256	-0.653108	0.182207	-3.58444	0.000337802	0.130794
Lamtor1	241.698	0.436534	0.123606	3.53165	0.000412981	0.153981
Dopey2	214.087	0.501725	0.142967	3.50939	0.000449135	0.156155
Sh3bgr	88.0306	0.654119	0.186413	3.50898	0.000449836	0.156155
Scaf8	255.565	0.556088	0.161166	3.45041	0.000559728	0.187826
Abca8a	70.9254	0.705952	0.205531	3.43477	0.000593064	0.192593
Klk6	95.418	-0.873984	0.258986	-3.37464	0.000739125	0.232524
Rsph3a	37.6363	1.13966	0.339171	3.36013	0.000779072	0.237664
Gmppa	99.2834	-0.560688	0.167283	-3.35174	0.000803056	0.237775
B3galt5	207.902	0.508979	0.152427	3.33916	0.000840307	0.241696
Slc39a9	164.993	0.483983	0.145376	3.32918	0.000871025	0.243572
9330159F19Rik	320.579	-0.357617	0.108069	-3.30916	0.000935759	0.254082
Gm11966	41.3079	0.735426	0.224155	3.28089	0.0010348	0.254082
Ptges2	50.3907	-0.686845	0.208848	-3.28873	0.0010064	0.254082
RP23-21P2,2	96.9679	-0.597665	0.182076	-3.2825	0.00102892	0.254082
Sla	59.1277	0.608042	0.184432	3.29684	0.000977801	0.254082
Smim11	116.636	0.622489	0.190741	3.26352	0.00110037	0.263748
Gtf2h5	439.631	0.452536	0.140909	3.21154	0.00132026	0.309093
5031420N21Rik	59.458	0.677363	0.21215	3.19286	0.00140873	0.315148
Tspan2	201.491	0.374787	0.117314	3.19475	0.00139953	0.315148
Ifnar1	81.7351	0.654343	0.206948	3.16188	0.00156755	0.315612
Ifnar2	52.3788	0.741015	0.234339	3.16215	0.00156608	0.315612
Mpc1	83.2793	0.639317	0.200855	3.18297	0.00145772	0.315612
Pcp4	1113.08	0.434292	0.137164	3.16622	0.00154433	0.315612
Prr18	414.83	0.817148	0.258113	3.16585	0.00154628	0.315612
Kcnj16	236.247	-0.433955	0.138627	-3.13037	0.00174585	0.339297
N4bp2l2	365.33	-0.381246	0.121834	-3.12924	0.0017526	0.339297
Hunk	115.451	0.493075	0.158473	3.1114	0.001862	0.347846
Rufy2	558.781	-0.323869	0.104111	-3.11079	0.00186587	0.347846
Thoc1	138.997	0.47727	0.154296	3.09321	0.00198005	0.362422
RP23-393I12,4	44.589	-0.676612	0.221716	-3.05171	0.00227541	0.409045
Gdap2	118.665	-0.457756	0.151556	-3.02037	0.00252462	0.443315
Prkcd	106.716	0.530282	0.175773	3.01686	0.00255412	0.443315
H2-D1	223.5	0.528775	0.176589	2.99438	0.00275004	0.461411
Rpl10-ps3	60.9182	-0.65875	0.219776	-2.99737	0.00272319	0.461411
Pola1	81.0667	-0.51585	0.172783	-2.98553	0.00283083	0.46718
1110004E09Rik	165.405	0.482181	0.161844	2.9793	0.00288911	0.469108
Gm18048	46.0184	-0.726725	0.245096	-2.96506	0.00302624	0.483574
Zdhhc14	194.946	0.453401	0.153187	2.95979	0.00307852	0.484242
Dusp7	53.1791	-0.757656	0.25726	-2.9451	0.00322847	0.500015
Cxcl12	209.732	0.5708	0.194821	2.92987	0.00339107	0.517241
Col11a1	64.2348	-0.581318	0.199123	-2.91939	0.00350713	0.52696
Arid1b	461.442	0.381944	0.132062	2.89217	0.00382593	0.566407
2900052N01Rik	77.2035	0.648811	0.228872	2.83482	0.00458519	0.617527
Amica1	43.6116	-0.746118	0.266084	-2.80407	0.00504622	0.617527
Atm	116.751	-0.451659	0.160545	-2.81329	0.00490379	0.617527
Atp5j	534.768	0.970888	0.340662	2.85001	0.00437181	0.617527
Casp9	70.5441	0.486368	0.174428	2.78836	0.00529762	0.617527
Clic6	84.1601	0.612125	0.219452	2.78934	0.00528163	0.617527
Ddx18	42.5239	-0.762069	0.271403	-2.80789	0.00498674	0.617527
Gm2115	54.1767	0.470607	0.168975	2.78506	0.00535176	0.617527
Kdm5b	339.905	-0.291769	0.105089	-2.7764	0.00549639	0.617527
Lyrm1	63.1958	0.541843	0.195261	2.77497	0.00552075	0.617527
Marf1	436.055	-0.358336	0.128338	-2.79213	0.0052363	0.617527
Mkl2	222.635	-0.352415	0.126689	-2.78173	0.00540708	0.617527
Mrps6	316.557	0.419844	0.147887	2.83896	0.00452612	0.617527
Mt2	2261.46	0.463646	0.165372	2.80365	0.00505272	0.617527
Pcdhga10	37.0537	-0.743578	0.260681	-2.85244	0.00433847	0.617527
Plxdc1	87.575	0.473622	0.168973	2.80295	0.00506377	0.617527
Pofut1	63.1195	-0.570798	0.205287	-2.7805	0.00542761	0.617527
Rhbdf1	45.8363	0.973346	0.345227	2.81944	0.00481073	0.617527
Rpl15	100.162	0.675691	0.240443	2.8102	0.00495114	0.617527
Slc41a3	101.401	0.531419	0.188245	2.82302	0.00475737	0.617527
Synj2	59.621	0.660989	0.237613	2.78178	0.00540611	0.617527
Wrb	235.555	0.342519	0.120382	2.84527	0.00443731	0.617527
Entpd5	66.5627	-0.522647	0.189587	-2.75677	0.00583753	0.638765
Farp1	89.8182	-0.49715	0.180246	-2.75818	0.00581248	0.638765
Donson	32.8098	0.694754	0.253321	2.74258	0.00609582	0.652836
St3gal2	459.491	-0.309647	0.112893	-2.74282	0.00609133	0.652836
Prrc2c	1617.59	-0.271179	0.0990217	-2.73859	0.00617041	0.653868
Flywch2	64.833	0.609271	0.223917	2.72097	0.00650902	0.682566
Gse1	151.154	0.47837	0.176127	2.71606	0.00660641	0.685636
Hspb11	39.601	0.729234	0.269937	2.7015	0.00690278	0.709085
Ets2	317.502	0.485985	0.180521	2.69213	0.00709978	0.720931
Itsn1	869.546	0.313442	0.116643	2.68718	0.00720575	0.720931
Pigp	54.3494	0.771241	0.287142	2.68592	0.00723295	0.720931
Xpnpep1	69.1455	0.471276	0.175981	2.678	0.00740632	0.730975
Hip1	185.211	-0.318176	0.118966	-2.67452	0.00748367	0.731438
Mbd6	169.428	0.568523	0.213123	2.66759	0.00763986	0.739523
Cbs	53.1393	-0.644117	0.242146	-2.66004	0.00781313	0.742026
Fam227a	37.4421	-0.666145	0.250356	-2.66079	0.00779578	0.742026
Inha	49.2599	0.62063	0.23414	2.65068	0.00803301	0.755779
2410006H16Rik	160.296	0.373619	0.141628	2.63804	0.00833874	0.770148
Elovl5	482.167	0.314255	0.119102	2.63854	0.00832648	0.770148
Gnptab	151.413	0.526084	0.199892	2.63184	0.0084923	0.7772
Etfa	66.1933	0.740984	0.282403	2.62385	0.00869414	0.788504
Ece1	319.637	0.330932	0.126327	2.61966	0.00880188	0.791147
Igfbp7	109.845	0.701459	0.268124	2.61617	0.00889214	0.792187
Akt1	455.756	0.29335	0.112622	2.60474	0.00919443	0.797933
Rnf126	92.1703	0.450829	0.173004	2.60589	0.00916353	0.797933
Tjp2	131.672	-0.585274	0.224522	-2.60676	0.00914029	0.797933
Nbeal1	509.757	-0.223693	0.0860407	-2.59985	0.00932642	0.802471
Atrnl1	94.0776	0.518762	0.200614	2.58587	0.00971325	0.828672
Tmed4	149.1	0.487062	0.188619	2.58225	0.00981571	0.830376
9530068E07Rik	169.742	0.516992	0.200952	2.57271	0.0100906	0.834681
Pdxdc1	112.821	-0.466319	0.180952	-2.57703	0.00996541	0.834681
Rer1	143.824	0.410113	0.159461	2.57186	0.0101153	0.834681
Asb3	53.6696	-0.549346	0.214058	-2.56634	0.0102778	0.838522
Ppm1h	87.8531	0.513295	0.200881	2.55522	0.0106119	0.838522
RP24-540L1,2	78.8136	-0.47822	0.187117	-2.55572	0.0105968	0.838522
Sclt1	225.272	-0.34771	0.136165	-2.5536	0.0106617	0.838522
Smurf2	95.0878	-0.411518	0.160743	-2.5601	0.0104642	0.838522
Tor2a	61.438	0.527917	0.206149	2.56085	0.0104417	0.838522
Sema7a	282.493	0.270265	0.105973	2.55032	0.0107624	0.839886
Nupl1	39.8211	-0.648013	0.254999	-2.54124	0.011046	0.845681
Rnf38	49.9078	0.551996	0.21702	2.54353	0.010974	0.845681
Stk4	185.031	-0.340854	0.1342	-2.53989	0.0110887	0.845681
Kcnk10	184.645	-0.472995	0.186502	-2.53614	0.011208	0.848356
Tm9sf2	313.802	0.379303	0.150279	2.52399	0.0116031	0.871704
Ccdc137	113.071	-0.337157	0.134013	-2.51586	0.0118742	0.878956
Mettl9	101.777	0.457772	0.181946	2.51598	0.0118703	0.878956
Tmie	52.6245	-0.640035	0.254663	-2.51326	0.011962	0.87899
Cdc42	917.352	0.234456	0.0935239	2.50691	0.0121791	0.88474
Ctsz	110.527	0.503043	0.200748	2.50584	0.012216	0.88474
Gm16973	39.286	-0.702663	0.282026	-2.49148	0.0127211	0.90324
Pde10a	316.362	0.38933	0.156252	2.49168	0.0127142	0.90324
Pvrl1	120.417	0.481504	0.193302	2.49094	0.0127406	0.90324
Ank2	2696.29	-0.31511	0.126772	-2.48564	0.012932	0.904069
Gm12846	65.4717	-0.491869	0.197729	-2.48759	0.0128613	0.904069
Tspan5	528.032	0.343476	0.138579	2.47855	0.0131917	0.915867
Ophn1	126.883	-0.386616	0.1565	-2.47039	0.0134964	0.918031
Rpl13	196.232	-0.442409	0.179016	-2.47134	0.0134607	0.918031
Tagap1	113.576	0.454563	0.18369	2.47462	0.0133378	0.918031
Arl8a	111.671	0.513889	0.208498	2.46472	0.0137122	0.926446
Ap1g1	431.979	-0.262011	0.10734	-2.44094	0.014649	0.932594
Atg101	107.088	-0.423278	0.17332	-2.44218	0.0145987	0.932594
Bckdhb	138.138	-0.441613	0.181129	-2.43811	0.0147642	0.932594
Celf3	59.4881	-1.19693	0.491242	-2.43655	0.0148281	0.932594
Colgalt1	144.771	-0.313801	0.12861	-2.43995	0.0146894	0.932594
Gxylt1	123.631	-0.351796	0.143732	-2.44757	0.0143822	0.932594
Ndufa12	388.26	0.377833	0.153729	2.45778	0.0139799	0.932594
Pdgfra	41.3066	-0.534155	0.219416	-2.43444	0.0149148	0.932594
Prkd3	64.415	0.467348	0.190931	2.44774	0.0143756	0.932594
RP23-21P2,6	48.3684	-0.601388	0.244835	-2.4563	0.0140378	0.932594
Rbak	60.4829	0.653489	0.266532	2.45182	0.0142136	0.932594
Sc5d	138.012	0.454654	0.185497	2.451	0.0142459	0.932594
Fam92a	95.0243	-0.371315	0.153083	-2.42559	0.0152837	0.944046
Jup	174.075	0.442214	0.182316	2.42554	0.0152855	0.944046
Ell	73.3244	0.544572	0.225164	2.41856	0.015582	0.944965
Nolc1	201.362	-0.29582	0.122242	-2.41995	0.0155228	0.944965
Spag9	1448.08	-0.22305	0.092145	-2.42064	0.0154933	0.944965
5530601H04Rik	74.4038	0.593875	0.252435	2.35259	0.0186432	0.951555
9330151L19Rik	51.023	0.51662	0.219714	2.35132	0.0187067	0.951555
A2m	75.2177	0.547399	0.231547	2.36409	0.0180744	0.951555
Arf4	215.936	0.333672	0.139422	2.39325	0.0167001	0.951555
Arl4c	355.489	0.226636	0.0951037	2.38304	0.0171703	0.951555
Birc6	822.91	-0.215826	0.0895263	-2.41076	0.0159193	0.951555
Ccnd2	64.32	-0.578076	0.239884	-2.40981	0.0159607	0.951555
Cep95	113.586	-0.358196	0.148784	-2.4075	0.0160622	0.951555
Chtop	240.697	0.291359	0.123112	2.36663	0.0179509	0.951555
Cyb5r3	177.805	0.331546	0.140131	2.36597	0.0179828	0.951555
Decr2	43.8629	-0.596807	0.251028	-2.37745	0.0174329	0.951555
Dusp10	54.2249	0.550809	0.230387	2.3908	0.0168117	0.951555
Dzip1	244.903	-0.382869	0.162487	-2.35631	0.0184576	0.951555
Ercc6	50.6096	-0.563896	0.239026	-2.35914	0.0183172	0.951555
Fam96a	62.1266	0.502027	0.212334	2.36432	0.0180631	0.951555
Isoc2a	109.422	-0.452127	0.192189	-2.35252	0.0186468	0.951555
Lincpint	50.97	-0.655638	0.276985	-2.36705	0.0179305	0.951555
Mapk11	52.6501	-0.574838	0.24469	-2.34925	0.0188115	0.951555
Med23	54.2884	0.483019	0.203243	2.37656	0.017475	0.951555
Nell1	93.5099	0.505953	0.215537	2.34741	0.0189044	0.951555
Pnmal2	1508.7	-0.244238	0.102772	-2.3765	0.0174778	0.951555
Ppp1r17	512.45	0.343218	0.142674	2.40561	0.0161454	0.951555
Prdm2	325.759	-0.337309	0.140669	-2.39789	0.0164896	0.951555
Rmnd5b	67.7523	0.515285	0.215195	2.3945	0.016643	0.951555
Slc6a15	114.771	0.617548	0.261994	2.35711	0.018418	0.951555
Stag1	421.93	-0.283442	0.11878	-2.38627	0.0170201	0.951555
Tatdn2	155.523	-0.377007	0.157584	-2.39242	0.0167377	0.951555
Tmem104	42.2822	-0.496417	0.211428	-2.34793	0.0188783	0.951555
Tmem55a	111.261	0.349024	0.148535	2.34978	0.0187844	0.951555
Trim67	132.275	0.359857	0.15053	2.3906	0.0168209	0.951555
Trnt1	129.052	-0.325725	0.13711	-2.37565	0.0175179	0.951555
Ubap2l	229.718	-0.27235	0.115793	-2.35204	0.0186707	0.951555
Uckl1	60.3295	0.679747	0.289513	2.3479	0.0188796	0.951555
Ylpm1	903.9	-0.252718	0.105964	-2.38494	0.0170821	0.951555
Arid4a	730.288	-0.21446	0.0915443	-2.34269	0.0191451	0.958874
Dock4	66.923	-0.601315	0.257789	-2.33259	0.0196698	0.975447
Mga	709.096	-0.223333	0.0957318	-2.33291	0.019653	0.975447
Firre	74.1407	-0.369176	0.158447	-2.32996	0.0198084	0.977507
Gm28437	341.555	-0.968748	0.416821	-2.32413	0.0201185	0.978418
Ptpn22	60.5014	-0.599711	0.257651	-2.32761	0.0199326	0.978418
Tmem181b-ps	55.4087	0.452197	0.194495	2.32498	0.0200728	0.978418
H2-K1	78.859	0.550866	0.237431	2.32011	0.0203348	0.984183
Akr1b10	90.2504	0.378095	0.167819	2.25299	0.0242596	0.985787
Amfr	235.018	0.242133	0.108151	2.23883	0.0251667	0.985787
Apmap	126.359	0.389704	0.172639	2.25734	0.0239868	0.985787
Atp2c1	261.436	0.423007	0.183857	2.30074	0.0214062	0.985787
Atp6v1g1	76.4794	0.580057	0.259111	2.23864	0.0251792	0.985787
Atxn7l3b	1167.08	0.257024	0.111786	2.29926	0.0214903	0.985787
Brinp3	164.689	-0.381582	0.168389	-2.26607	0.0234472	0.985787
C2cd2	91.5065	0.464769	0.205214	2.26481	0.0235245	0.985787
Ccdc94	37.9432	-0.515085	0.227708	-2.26205	0.0236946	0.985787
Cdk13	283.363	-0.264918	0.117774	-2.24938	0.0244885	0.985787
Cdkl3	62.9371	0.40805	0.181007	2.25433	0.0241756	0.985787
Cog4	130.77	-0.39376	0.173857	-2.26485	0.0235216	0.985787
Dcaf7	251.049	0.267398	0.118245	2.26139	0.0237349	0.985787
Ermn	349.167	-0.33976	0.148973	-2.28068	0.0225675	0.985787
Esam	82.3878	0.363256	0.162704	2.23262	0.0255742	0.985787
Fbrsl1	208.751	0.351804	0.155688	2.25968	0.0238413	0.985787
Fbxw2	205.409	0.26731	0.119337	2.23995	0.0250939	0.985787
Fgfr1op	133.225	0.364156	0.157665	2.30968	0.0209059	0.985787
Gm28320	67.4055	-0.449229	0.195427	-2.2987	0.0215219	0.985787
Grhpr	104.65	0.325498	0.142752	2.28016	0.0225981	0.985787
H3f3b	726.811	0.285309	0.125406	2.27509	0.0229005	0.985787
Kcnj6	45.7705	0.533342	0.234484	2.27453	0.0229342	0.985787
Kif26b	202.47	-0.341837	0.14907	-2.29313	0.0218404	0.985787
Larp7	99.8548	-0.421274	0.18785	-2.24261	0.0249219	0.985787
Mbd4	48.7685	0.568102	0.246869	2.30123	0.0213785	0.985787
Mettl3	36.2168	0.562465	0.248533	2.26314	0.023627	0.985787
Mta2	75.3379	0.493494	0.215303	2.29209	0.0219004	0.985787
Mtf1	138.503	0.348863	0.154231	2.26196	0.0237001	0.985787
Nr2c2	754.474	-0.281024	0.125492	-2.23937	0.0251317	0.985787
Nvl	234.456	-0.304214	0.136246	-2.23283	0.0255602	0.985787
Pbx2	157.341	0.310699	0.13407	2.31744	0.0204797	0.985787
Pde3a	32.4248	-0.781068	0.347042	-2.25064	0.0244082	0.985787
Pex6	79.8873	0.537315	0.236282	2.27405	0.0229633	0.985787
Pi4k2a	261.838	-0.405551	0.180419	-2.24783	0.0245873	0.985787
Pik3r4	115.212	-0.518526	0.22423	-2.31248	0.0207515	0.985787
Poll	38.2031	-0.617602	0.267172	-2.31162	0.0207984	0.985787
Prex2	296.012	-0.350309	0.156392	-2.23994	0.0250945	0.985787
Prpf8	345.756	0.284253	0.124157	2.28947	0.0220522	0.985787
Rps4x	45.2287	0.59263	0.26185	2.26324	0.0236211	0.985787
Rtel1	45.4066	0.520809	0.22742	2.29008	0.0220169	0.985787
Rtn2	115.242	0.344469	0.154375	2.23138	0.0256557	0.985787
Safb2	264.622	-0.261433	0.116978	-2.23488	0.025425	0.985787
Serinc5	79.5852	0.419232	0.182277	2.29997	0.0214499	0.985787
Slc39a1	66.1532	0.495688	0.221401	2.23887	0.0251644	0.985787
Smarcc1	325.089	-0.289003	0.12543	-2.30409	0.0212175	0.985787
Smim4	116.864	0.351355	0.156799	2.2408	0.0250393	0.985787
Sod1	1975.07	0.304318	0.134551	2.26173	0.0237139	0.985787
Tmcc1	478.394	-0.242268	0.105402	-2.29851	0.0215328	0.985787
Tpcn1	122.186	-0.372371	0.166768	-2.23287	0.0255575	0.985787
Ubr4	888.965	-0.24029	0.10759	-2.23339	0.0255232	0.985787
Vps13c	316.168	-0.311577	0.138001	-2.2578	0.0239584	0.985787
Vps37a	335.398	-0.268422	0.119183	-2.25217	0.0243114	0.985787
Yy1	271.588	-0.324225	0.143202	-2.26411	0.0235672	0.985787
Zic3	89.6614	-0.407041	0.181515	-2.24246	0.0249316	0.985787
Acadm	97.8228	-0.367842	0.165251	-2.22596	0.0260171	0.9921
Zc3h12b	74.8338	-0.400323	0.17974	-2.22724	0.0259315	0.9921
Bcor	36.9067	0.693949	0.312035	2.22395	0.0261518	0.993228
Gjb1	88.5297	-0.519563	0.233919	-2.22112	0.0263427	0.993228
Gpr153	56.5494	0.575915	0.259173	2.22212	0.0262749	0.993228
0610030E20Rik	107.486	-0.301637	0.144442	-2.08829	0.0367719	0.997477
1810026J23Rik	109.204	0.351123	0.162441	2.16155	0.0306533	0.997477
3830406C13Rik	120.79	0.36589	0.173063	2.1142	0.0344979	0.997477
5330434G04Rik	595.046	-0.254497	0.115843	-2.19691	0.0280265	0.997477
Adarb2	47.7913	0.583834	0.280546	2.08106	0.0374284	0.997477
Adck2	73.9877	-0.406816	0.185139	-2.19735	0.0279956	0.997477
Aldh1l2	68.9929	0.413998	0.189028	2.19014	0.028514	0.997477
Ankib1	89.5918	-0.430625	0.201485	-2.13726	0.0325768	0.997477
Armcx3	213.588	0.250832	0.116879	2.14608	0.031867	0.997477
Arpc1a	336.654	0.400143	0.184235	2.17191	0.0298622	0.997477
Ascc1	34.784	-0.507707	0.230866	-2.19914	0.0278678	0.997477
Atl2	294.33	0.257441	0.124915	2.06094	0.0393091	0.997477
B3galt2	116.276	-0.379217	0.175746	-2.15775	0.0309471	0.997477
B3galt6	32.7004	0.699931	0.323711	2.16221	0.030602	0.997477
C1qc	44.8705	0.596535	0.286828	2.07977	0.0375469	0.997477
Calb1	1969.75	0.193108	0.0894882	2.15792	0.0309343	0.997477
Capn15	47.8349	-0.50884	0.232926	-2.18456	0.0289215	0.997477
Cbx5	981.411	-0.186012	0.0868639	-2.14141	0.0322406	0.997477
Ccdc53	71.8432	0.509945	0.245855	2.07417	0.0380637	0.997477
Cdc25b	82.4689	-0.477201	0.222545	-2.14429	0.0320093	0.997477
Cep76	121.48	0.357335	0.165111	2.16421	0.0304483	0.997477
Cep83os	55.2432	0.496959	0.225749	2.20138	0.0277093	0.997477
Cfl2	367.679	-0.233418	0.109704	-2.12771	0.0333609	0.997477
Chd5	228.477	-0.274789	0.13135	-2.09203	0.0364356	0.997477
Chst2	249.843	0.244675	0.118916	2.05755	0.0396335	0.997477
Cln8	98.1303	0.358041	0.164361	2.17838	0.0293775	0.997477
Cnih4	197.887	-0.263819	0.125525	-2.10172	0.0355782	0.997477
Cobll1	47.2092	0.438461	0.209528	2.09261	0.0363838	0.997477
Col8a1	32.0635	-0.737626	0.333782	-2.2099	0.0271121	0.997477
Ctss	267.631	0.418344	0.197576	2.11738	0.0342275	0.997477
Ddr2	62.6253	0.560342	0.253823	2.20761	0.0272717	0.997477
Deb1	158.931	0.26979	0.129997	2.07535	0.037954	0.997477
Dhrs13	40.6302	0.569387	0.27262	2.08858	0.0367459	0.997477
Dleu2	131.736	-0.360299	0.172083	-2.09375	0.0362822	0.997477
Dnajb5	89.4225	0.602492	0.288578	2.08779	0.0368166	0.997477
Dnajc18	290.476	-0.283102	0.132107	-2.14298	0.0321146	0.997477
Drap1	409.234	-0.342826	0.155085	-2.21057	0.0270655	0.997477
Eapp	366.892	-0.215346	0.103478	-2.08108	0.0374269	0.997477
Eif4e2	209.444	-0.352478	0.162541	-2.16855	0.0301168	0.997477
Fgd4	276.454	-0.309854	0.148196	-2.09083	0.036543	0.997477
Fitm2	62.6169	-0.451413	0.21394	-2.11	0.0348587	0.997477
Gabrb2	48.925	-0.476023	0.218457	-2.17902	0.0293303	0.997477
Gm11263	115.609	-0.388531	0.183693	-2.11512	0.0344201	0.997477
Gm12791	47.3639	-0.476469	0.226506	-2.10356	0.035417	0.997477
Gm16039	43.5151	0.62388	0.291492	2.1403	0.0323306	0.997477
Gm2058	113.942	-0.406085	0.191407	-2.12158	0.0338729	0.997477
Gpr68	44.7179	-0.500393	0.230347	-2.17234	0.02983	0.997477
Il20rb	179.055	-0.428873	0.197321	-2.17348	0.029744	0.997477
Itgb4	56.0098	-0.489628	0.23035	-2.12559	0.0335378	0.997477
Itpka	103.229	0.416394	0.197886	2.10421	0.0353599	0.997477
Kcnb2	106.077	0.339621	0.1576	2.15495	0.0311657	0.997477
Kdm5a	476.044	-0.186656	0.0849715	-2.19669	0.0280427	0.997477
Khdrbs3	99.9147	-0.454186	0.216624	-2.09665	0.0360243	0.997477
Lasp1	330.93	0.268796	0.121361	2.21484	0.0267711	0.997477
Ldlrap1	85.4484	-0.359113	0.166521	-2.15656	0.0310401	0.997477
Ltn1	204.843	0.290931	0.135734	2.14339	0.0320818	0.997477
Luzp2	55.5249	-0.530811	0.255373	-2.07857	0.0376565	0.997477
Lyrm9	193.759	0.25848	0.119593	2.16132	0.0306703	0.997477
Lyst	165.685	-0.304528	0.145685	-2.09032	0.0365892	0.997477
Lyz2	50.4037	0.726876	0.341933	2.12578	0.0335212	0.997477
Map2	3311.34	-0.162395	0.0744245	-2.18201	0.0291091	0.997477
Mapk10	1176.05	-0.266634	0.124095	-2.14862	0.0316643	0.997477
Mbtd1	245.724	-0.282117	0.133925	-2.10652	0.0351591	0.997477
Me3	138.516	0.288827	0.139733	2.06698	0.0387359	0.997477
Mmgt1	104.818	0.343222	0.164815	2.08247	0.0372998	0.997477
Mthfsd	84.1754	0.406657	0.190531	2.13434	0.0328153	0.997477
Mum1	116.897	0.293715	0.141838	2.07078	0.0383798	0.997477
Mxd4	495.659	-0.289376	0.13121	-2.20544	0.027423	0.997477
Naaa	34.2068	0.563093	0.26582	2.11832	0.034148	0.997477
Nbea	1333.17	-0.196858	0.091655	-2.14781	0.0317287	0.997477
Nfs1	93.808	0.436879	0.21151	2.06552	0.0388735	0.997477
Nnat	697.631	-0.352004	0.170809	-2.06081	0.039321	0.997477
Nrd1	387.776	-0.237418	0.114083	-2.0811	0.0374245	0.997477
Nsg1	2105.89	0.14591	0.0684168	2.13266	0.0329527	0.997477
Oaz1	525.438	0.247309	0.118876	2.08039	0.0374897	0.997477
Pak7	246.013	-0.264393	0.124574	-2.12238	0.0338056	0.997477
Pbx3	312.351	0.249674	0.118197	2.11236	0.0346558	0.997477
Pdzd8	253.366	-0.282224	0.132402	-2.13157	0.0330419	0.997477
Pex11a	119.42	0.355764	0.170158	2.09078	0.0365478	0.997477
Pigq	236.87	0.276832	0.129852	2.13191	0.0330144	0.997477
Pitpnc1	512.402	-0.207126	0.0963994	-2.14862	0.0316646	0.997477
Pla2g7	658.313	0.219963	0.102022	2.15603	0.0310816	0.997477
Polr1a	74.4572	-0.393832	0.184607	-2.13335	0.0328963	0.997477
Prpf4b	1511.83	-0.257044	0.119559	-2.14993	0.0315606	0.997477
Prps2	43.6983	-0.495886	0.235515	-2.10554	0.0352447	0.997477
Prr14	59.0595	0.504011	0.244087	2.06488	0.0389345	0.997477
Psmc2	446.003	0.171921	0.0835346	2.05808	0.0395821	0.997477
Psmd8	493.702	0.199924	0.0905955	2.20678	0.0273296	0.997477
Ptdss2	134.664	-0.356328	0.167811	-2.12339	0.0337214	0.997477
Ptpru	62.2216	-0.377156	0.182643	-2.06499	0.0389243	0.997477
RP23-137B16,3	35.2838	-0.53071	0.246699	-2.15125	0.0314568	0.997477
RP23-21P2,7	62.6542	-0.415284	0.201619	-2.05975	0.0394224	0.997477
RP23-383N15,1	61.2855	-0.431125	0.200599	-2.14919	0.0316197	0.997477
Rarg	32.5306	-0.509626	0.241351	-2.11155	0.0347248	0.997477
Rars	157.435	0.33885	0.163893	2.06752	0.0386856	0.997477
Rcan1	90.8771	0.32616	0.154422	2.11214	0.0346747	0.997477
Reep3	302.809	-0.239349	0.10979	-2.18007	0.0292521	0.997477
Rnf168	262.55	-0.239437	0.113773	-2.10451	0.0353336	0.997477
Rngtt	99.4789	0.296864	0.139791	2.12362	0.0337019	0.997477
Rpl9	178.875	0.282213	0.13408	2.10482	0.0353069	0.997477
Rpn1	563.355	0.247274	0.113693	2.17492	0.0296359	0.997477
Sap30bp	61.2977	-0.434435	0.19588	-2.21786	0.0265643	0.997477
Sap30l	148.08	-0.369044	0.178644	-2.0658	0.0388471	0.997477
Senp1	91.8999	0.36931	0.177007	2.08642	0.036941	0.997477
Sfpq	956.974	-0.25353	0.119652	-2.11889	0.0340998	0.997477
Slc22a15	65.4331	0.511823	0.237396	2.15599	0.0310844	0.997477
Slc6a11	676.164	-0.265606	0.127348	-2.08567	0.0370081	0.997477
Smarca1	144.193	-0.321816	0.155638	-2.06772	0.0386662	0.997477
Smn1	149.625	-0.332869	0.154394	-2.15598	0.0310854	0.997477
Snord13	93.7654	-0.501794	0.230648	-2.17558	0.0295867	0.997477
Snord89	275.563	-0.44715	0.21004	-2.12888	0.0332645	0.997477
Sorcs3	217.738	0.264944	0.124028	2.13616	0.0326663	0.997477
Srcap	318.833	-0.317589	0.148767	-2.13481	0.0327768	0.997477
Srrt	342.056	-0.266823	0.129274	-2.06402	0.0390161	0.997477
Srsf4	128.456	0.520078	0.250419	2.07683	0.0378174	0.997477
Stk17b	111.119	0.414687	0.20001	2.07333	0.0381419	0.997477
Suv39h1	39.2548	-0.525866	0.242612	-2.16752	0.0301953	0.997477
Syngr2	36.167	-0.512773	0.241523	-2.12308	0.0337473	0.997477
Thnsl1	73.7727	-0.425499	0.196244	-2.16822	0.0301423	0.997477
Tmem132e	32.2055	-0.587126	0.278775	-2.10609	0.0351963	0.997477
Tnfaip6	47.8882	0.636676	0.289158	2.20183	0.0276774	0.997477
Tor1a	51.0126	0.526634	0.237958	2.21314	0.0268882	0.997477
Tsen2	81.7347	-0.422344	0.199559	-2.11638	0.0343123	0.997477
Tysnd1	39.5214	-0.468348	0.221425	-2.11515	0.0344171	0.997477
Ubfd1	81.4099	0.466816	0.21791	2.14224	0.0321742	0.997477
Vcan	125.924	-0.384994	0.179115	-2.14942	0.0316014	0.997477
Vps41	394.91	-0.234445	0.113878	-2.05874	0.0395191	0.997477
Xpot	108.634	0.308361	0.149753	2.05914	0.039481	0.997477
Zfp326	336.852	-0.208204	0.0995869	-2.09067	0.0365574	0.997477
Zfp961	46.602	0.526739	0.241873	2.17775	0.0294249	0.997477
Znhit1	99.2612	-0.384044	0.18489	-2.07715	0.0377881	0.997477
Zyx	88.6479	0.337447	0.160811	2.0984	0.0358694	0.997477
Zzz3	211.343	-0.330548	0.152859	-2.16244	0.0305843	0.997477
A330076H08Rik	498.582	-0.322034	0.15675	-2.05444	0.039933	0.997629
Hmgcr	173.13	0.292857	0.142713	2.05208	0.0401623	0.997629
Ipo5	173.553	-0.275606	0.134354	-2.05134	0.0402342	0.997629
Ntn4	57.7764	-0.404406	0.197004	-2.05278	0.0400938	0.997629
Sez6l	247.913	0.369056	0.179777	2.05286	0.0400863	0.997629
Speg	162.342	-0.303887	0.148053	-2.05255	0.0401163	0.997629
Snhg7	42.403	0.482375	0.235298	2.05006	0.0403582	0.998246
0610007P14Rik	339.988	0.112022	0.115401	0.970726	0.331685	0.999317
0610009O20Rik	108.453	-0.0434621	0.170505	-0.254903	0.798798	0.999317
0610010F05Rik	185.183	-0.0651529	0.13491	-0.482937	0.629141	0.999317
0610011F06Rik	118.649	0.178631	0.139708	1.2786	0.201038	0.999317
0610037L13Rik	86.0732	0.014064	0.185695	0.0757371	0.939628	0.999317
1110001J03Rik	426.289	0.180829	0.112164	1.61218	0.106923	0.999317
1110004F10Rik	343.837	0.0113503	0.14707	0.0771765	0.938483	0.999317
1110007C09Rik	46.6993	0.291733	0.234881	1.24205	0.21422	0.999317
1110008F13Rik	343.694	0.119563	0.109906	1.08787	0.276654	0.999317
1110008P14Rik	183.483	-0.248788	0.149514	-1.66398	0.0961161	0.999317
1110032A03Rik	91.483	-0.170017	0.231634	-0.73399	0.462955	0.999317
1110037F02Rik	127.736	-0.0848247	0.161472	-0.52532	0.599361	0.999317
1110038F14Rik	98.7306	-0.0898138	0.155646	-0.577038	0.563914	0.999317
1110051M20Rik	173.874	0.011779	0.142432	0.0826987	0.934091	0.999317
1110057K04Rik	67.9237	-0.26787	0.213433	-1.25505	0.209459	0.999317
1110058L19Rik	79.408	0.366785	0.219721	1.66932	0.0950545	0.999317
1110059E24Rik	118.183	0.243665	0.163442	1.49083	0.136005	0.999317
1110059G10Rik	77.6888	-0.143567	0.194229	-0.739167	0.459805	0.999317
1110065P20Rik	149.027	0.129186	0.132165	0.977465	0.328339	0.999317
1190002N15Rik	259.299	0.249729	0.173034	1.44323	0.148955	0.999317
1200014J11Rik	157.105	-0.0433852	0.146714	-0.295714	0.767449	0.999317
1300002E11Rik	53.503	-0.179667	0.194887	-0.921901	0.35658	0.999317
1500004A13Rik	111.626	-0.133342	0.17535	-0.760435	0.446994	0.999317
1500009C09Rik	280.674	-0.124542	0.132322	-0.941206	0.346599	0.999317
1500009L16Rik	40.7173	0.197151	0.283009	0.696624	0.486038	0.999317
1500011B03Rik	213.903	0.178027	0.136062	1.30843	0.190727	0.999317
1500011K16Rik	91.1041	0.0248536	0.179933	0.138127	0.89014	0.999317
1500012F01Rik	205.833	0.282203	0.192351	1.46713	0.142341	0.999317
1500015O10Rik	67.1013	-0.284531	0.206682	-1.37666	0.168616	0.999317
1600012H06Rik	35.1472	0.217344	0.287043	0.757181	0.448942	0.999317
1600014C10Rik	62.9881	0.10873	0.17964	0.605268	0.545001	0.999317
1700020I14Rik	2179.85	-0.0935121	0.07088	-1.3193	0.187068	0.999317
1700021F05Rik	84.4735	-0.00222538	0.178056	-0.0124982	0.990028	0.999317
1700021K19Rik	164.247	0.0839346	0.124883	0.672106	0.501516	0.999317
1700025G04Rik	482.75	-0.0758069	0.124691	-0.607958	0.543215	0.999317
1700028B04Rik	54.7116	0.059972	0.232007	0.258492	0.796027	0.999317
1700037H04Rik	115.967	0.0787492	0.138084	0.570298	0.568476	0.999317
1700047M11Rik	43.9299	-0.0305936	0.240727	-0.127088	0.898871	0.999317
1700052N19Rik	80.4267	0.178696	0.176496	1.01246	0.311317	0.999317
1700066M21Rik	32.5092	0.108847	0.324352	0.335581	0.737187	0.999317
1700123O20Rik	42.1704	0.173606	0.264827	0.655546	0.512117	0.999317
1700124L16Rik	55.2318	-0.0933356	0.234944	-0.397267	0.691171	0.999317
1810013L24Rik	175.401	0.166794	0.190594	0.875128	0.381504	0.999317
1810022K09Rik	115.716	0.0243982	0.169485	0.143955	0.885536	0.999317
1810030O07Rik	109.359	-0.286016	0.163443	-1.74994	0.080128	0.999317
1810037I17Rik	238.531	0.28271	0.1802	1.56887	0.116677	0.999317
1810041L15Rik	48.9393	-0.124603	0.275334	-0.452555	0.65087	0.999317
1810043G02Rik	57.3108	-0.0371898	0.18878	-0.197001	0.843827	0.999317
1810043H04Rik	177.611	-0.188368	0.16791	-1.12184	0.261932	0.999317
1810058I24Rik	120.942	0.128827	0.167354	0.769789	0.441425	0.999317
2010012O05Rik	139.831	0.119535	0.199897	0.597983	0.549851	0.999317
2010107E04Rik	780.309	0.0442898	0.108373	0.408679	0.682775	0.999317
2010107G23Rik	55.4252	0.161521	0.197039	0.819741	0.412364	0.999317
2010111I01Rik	64.9075	0.221722	0.226337	0.979612	0.327278	0.999317
2010204K13Rik	37.5041	0.381236	0.324958	1.17319	0.24072	0.999317
2010300C02Rik	41.8134	0.327922	0.2511	1.30594	0.191574	0.999317
2010315B03Rik	37.4705	-0.206419	0.289926	-0.711972	0.476482	0.999317
2010320M18Rik	45.7095	0.0325033	0.281003	0.115669	0.907915	0.999317
2210013O21Rik	120.462	0.149425	0.154243	0.968762	0.332664	0.999317
2210015D19Rik	80.3723	-0.251081	0.206002	-1.21883	0.22291	0.999317
2210016L21Rik	383.601	-0.144404	0.104185	-1.38603	0.165737	0.999317
2210017G18Rik	60.2995	-0.361861	0.203588	-1.77742	0.0754987	0.999317
2210018M11Rik	200.511	0.125822	0.110168	1.14209	0.253416	0.999317
2210408F21Rik	46.9719	-0.0046428	0.235	-0.0197566	0.984238	0.999317
2300009A05Rik	148.238	-0.147974	0.159709	-0.926518	0.354177	0.999317
2310003H01Rik	82.8329	0.0282054	0.240294	0.117379	0.90656	0.999317
2310010J17Rik	44.8863	0.0601304	0.211869	0.283809	0.776557	0.999317
2310011J03Rik	47.2578	-0.137131	0.25039	-0.547668	0.58392	0.999317
2310022A10Rik	61.8481	-0.0519356	0.185294	-0.280287	0.779257	0.999317
2310022B05Rik	231.301	0.0393167	0.144368	0.272337	0.785363	0.999317
2310033P09Rik	148.875	-0.0142226	0.163724	-0.0868691	0.930776	0.999317
2310035C23Rik	271.605	0.0679641	0.13348	0.509169	0.610634	0.999317
2310036O22Rik	371.752	0.0906757	0.100023	0.906552	0.364644	0.999317
2310045N01Rik	56.268	-0.136985	0.218233	-0.627701	0.5302	0.999317
2310047M10Rik	168.484	-0.101611	0.154615	-0.657188	0.51106	0.999317
2310057M21Rik	66.6365	0.230165	0.239668	0.960348	0.33688	0.999317
2310061I04Rik	252.588	0.104414	0.143438	0.727935	0.466653	0.999317
2310067B10Rik	74.7552	0.0673118	0.254243	0.264754	0.791199	0.999317
2410002F23Rik	89.6475	-0.210534	0.227988	-0.923443	0.355776	0.999317
2410004B18Rik	84.0255	-0.0139168	0.209054	-0.0665703	0.946924	0.999317
2410004N09Rik	85.5373	-0.255565	0.222125	-1.15055	0.249918	0.999317
2410015M20Rik	128.381	0.0132981	0.152625	0.0871292	0.930569	0.999317
2410016O06Rik	76.345	-0.0185072	0.191628	-0.0965787	0.923061	0.999317
2410089E03Rik	290.962	-0.035812	0.136485	-0.262387	0.793023	0.999317
2410131K14Rik	61.5951	-0.154615	0.192539	-0.803032	0.421956	0.999317
2510002D24Rik	105.915	-0.0315605	0.191803	-0.164546	0.869301	0.999317
2510003E04Rik	268.852	0.0539061	0.16139	0.334011	0.738372	0.999317
2510009E07Rik	173.213	-0.0624376	0.154022	-0.405381	0.685198	0.999317
2510039O18Rik	78.5467	0.187255	0.214013	0.874971	0.38159	0.999317
2610001J05Rik	91.7224	0.164288	0.182208	0.901652	0.367242	0.999317
2610002J02Rik	123.564	-0.304713	0.184645	-1.65027	0.0988878	0.999317
2610002M06Rik	121.82	0.0472782	0.132823	0.355949	0.721879	0.999317
2610008E11Rik	69.2736	-0.00649283	0.199776	-0.0325005	0.974073	0.999317
2610015P09Rik	77.1839	-0.142052	0.191898	-0.74025	0.459149	0.999317
2610037D02Rik	75.4641	-0.0575678	0.218751	-0.263166	0.792423	0.999317
2610203C20Rik	299.789	-0.0779072	0.134432	-0.579528	0.562233	0.999317
2610301B20Rik	99.0595	-0.237728	0.166974	-1.42374	0.154522	0.999317
2610507B11Rik	629.48	0.127512	0.108573	1.17444	0.24022	0.999317
2700029M09Rik	180.375	0.14721	0.160308	0.918296	0.358464	0.999317
2700049A03Rik	75.0216	-0.0864948	0.204741	-0.422459	0.67269	0.999317
2700060E02Rik	129.057	-0.0332455	0.152601	-0.217858	0.827539	0.999317
2700089E24Rik	563.333	0.0570631	0.180116	0.316813	0.751386	0.999317
2700094K13Rik	68.058	-0.207018	0.181429	-1.14104	0.253852	0.999317
2700097O09Rik	78.1368	-0.121175	0.188906	-0.641458	0.521225	0.999317
2810001G20Rik	64.1311	-0.0445505	0.194694	-0.228823	0.819007	0.999317
2810004N23Rik	141.546	-0.327381	0.166982	-1.96058	0.0499286	0.999317
2810006K23Rik	69.3961	0.0419902	0.242771	0.172962	0.862681	0.999317
2810008D09Rik	180.622	0.136553	0.209444	0.651978	0.514415	0.999317
2810013P06Rik	124.759	-0.118045	0.141859	-0.832133	0.405334	0.999317
2810025M15Rik	53.8192	0.274817	0.234703	1.17091	0.241634	0.999317
2810403A07Rik	265.494	0.0449752	0.177673	0.253134	0.800165	0.999317
2810408M09Rik	97.3016	-0.115529	0.183609	-0.629209	0.529212	0.999317
2810428I15Rik	141.19	-0.00895328	0.199749	-0.0448226	0.964249	0.999317
2810468N07Rik	102.247	-0.160075	0.208621	-0.7673	0.442903	0.999317
2810474O19Rik	303.026	-0.0608191	0.128622	-0.47285	0.63632	0.999317
2900011O08Rik	371.017	0.059186	0.115315	0.513254	0.607774	0.999317
2900026A02Rik	33.6225	0.22827	0.254489	0.896974	0.369733	0.999317
2900052L18Rik	33.059	-0.100431	0.299008	-0.335881	0.736961	0.999317
2900093K20Rik	35.9851	-0.152489	0.224214	-0.680105	0.496438	0.999317
3010026O09Rik	34.7267	0.0859151	0.273668	0.313939	0.753568	0.999317
3110021N24Rik	78.9123	-0.241592	0.238661	-1.01228	0.311403	0.999317
3110035E14Rik	71.5023	-0.0545331	0.262764	-0.207536	0.835591	0.999317
3110043O21Rik	123.971	0.231752	0.172377	1.34445	0.178804	0.999317
3110057O12Rik	92.3588	0.0421096	0.164477	0.256021	0.797935	0.999317
3222401L13Rik	66.1115	-0.0952325	0.227695	-0.418246	0.675767	0.999317
3632451O06Rik	312.892	-0.0963014	0.12261	-0.785426	0.432204	0.999317
4632415L05Rik	95.6257	-0.148609	0.243567	-0.610137	0.541771	0.999317
4632427E13Rik	305.872	-0.0735838	0.164696	-0.446787	0.655029	0.999317
4632428N05Rik	44.6895	0.102307	0.269132	0.380136	0.703845	0.999317
4833420G17Rik	107.11	0.0181971	0.274288	0.066343	0.947105	0.999317
4833439L19Rik	134.126	0.142772	0.350254	0.407624	0.68355	0.999317
4921504A21Rik	63.8891	0.211672	0.214374	0.987395	0.323449	0.999317
4921524J17Rik	47.9803	0.157746	0.230064	0.685661	0.492927	0.999317
4930402H24Rik	273.873	-0.0176309	0.0973267	-0.181151	0.856249	0.999317
4930430F08Rik	78.8145	0.0709952	0.228985	0.310042	0.756529	0.999317
4930453N24Rik	88.5169	0.0687497	0.192448	0.357237	0.720915	0.999317
4930503L19Rik	33.7547	-0.0998431	0.30017	-0.332622	0.73942	0.999317
4930506M07Rik	123.14	-0.00287888	0.189142	-0.0152207	0.987856	0.999317
4930518I15Rik	32.7799	0.0585362	0.282381	0.207295	0.83578	0.999317
4930523C07Rik	33.9112	0.00780664	0.301285	0.0259112	0.979328	0.999317
4930526A20Rik	62.6322	0.064365	0.443718	0.145058	0.884665	0.999317
4930570G19Rik	36.4161	0.00950216	0.235761	0.0403042	0.967851	0.999317
4930594M22Rik	71.5927	-0.357515	0.205098	-1.74314	0.0813084	0.999317
4931406C07Rik	64.0566	0.0460226	0.181882	0.253036	0.80024	0.999317
4931406P16Rik	177.377	-0.252077	0.155544	-1.62062	0.1051	0.999317
4931428F04Rik	40.3157	-0.0828571	0.266349	-0.311084	0.755736	0.999317
4932438A13Rik	806.117	-0.0131771	0.110306	-0.119459	0.904912	0.999317
4933426M11Rik	117.934	0.172343	0.244805	0.704003	0.481431	0.999317
4933427D14Rik	106.993	0.0480526	0.164449	0.292203	0.770131	0.999317
4933431E20Rik	124.564	-0.0684196	0.149904	-0.456423	0.648085	0.999317
4933434E20Rik	217.657	-0.183698	0.131655	-1.3953	0.162927	0.999317
4933439C10Rik	47.3795	0.128646	0.238647	0.539064	0.589843	0.999317
5031425E22Rik	96.25	-0.0760424	0.195654	-0.388657	0.69753	0.999317
5031434O11Rik	64.0587	-0.170907	0.212934	-0.802631	0.422188	0.999317
5031439G07Rik	428.489	-0.10214	0.103357	-0.988232	0.323039	0.999317
5330438D12Rik	57.7561	-0.174463	0.262911	-0.663581	0.506958	0.999317
5430405H02Rik	89.2638	0.0796414	0.17149	0.46441	0.642354	0.999317
5730409E04Rik	451.511	-0.00239648	0.13798	-0.0173683	0.986143	0.999317
5730455P16Rik	403.466	-0.118059	0.139519	-0.846184	0.39745	0.999317
5830416P10Rik	63.7495	-0.414189	0.248033	-1.66989	0.0949406	0.999317
5830428H23Rik	215.693	-0.142515	0.165977	-0.858639	0.39054	0.999317
6030419C18Rik	115.422	0.123974	0.261576	0.473949	0.635536	0.999317
6030458C11Rik	65.9954	-0.0800369	0.213972	-0.374053	0.708365	0.999317
6230415J03Rik	64.6578	0.151816	0.295472	0.51381	0.607385	0.999317
6330403K07Rik	252.542	-0.0367591	0.164083	-0.224028	0.822736	0.999317
6330403L08Rik	33.9611	0.120352	0.318798	0.377519	0.705788	0.999317
6330408A02Rik	66.8706	-0.340372	0.227779	-1.49431	0.135094	0.999317
6330416G13Rik	41.8316	-0.016956	0.244957	-0.0692203	0.944814	0.999317
6330418K02Rik	45.4299	-0.375454	0.249986	-1.5019	0.133123	0.999317
6330419J24Rik	62.0297	0.0269622	0.259089	0.104066	0.917117	0.999317
6430548M08Rik	925.863	-0.0768651	0.0752484	-1.02148	0.307025	0.999317
6430571L13Rik	100.602	-0.499415	0.399718	-1.24942	0.211512	0.999317
6430573F11Rik	231.094	0.159972	0.185989	0.860117	0.389724	0.999317
6430590A07Rik	33.4983	-1.18979	0.653503	-1.82063	0.0686632	0.999317
6720427I07Rik	110.164	0.0205181	0.252159	0.0813697	0.935148	0.999317
8430419L09Rik	174.413	0.0186201	0.148725	0.125198	0.900367	0.999317
8430429K09Rik	55.6275	0.105756	0.236104	0.447922	0.654209	0.999317
9030624J02Rik	159.845	0.209161	0.167287	1.25031	0.211186	0.999317
9130020K20Rik	148.453	-0.236884	0.169161	-1.40035	0.161409	0.999317
9130221H12Rik	34.1751	0.0582503	0.24507	0.237689	0.812123	0.999317
9130401M01Rik	143.645	-0.0760029	0.130822	-0.580966	0.561263	0.999317
9230114K14Rik	47.6231	0.125898	0.265428	0.474322	0.635271	0.999317
9330132A10Rik	44.3842	0.0086196	0.252889	0.0340845	0.97281	0.999317
9330159N05Rik	49.7935	0.231172	0.22834	1.0124	0.311345	0.999317
9330162012Rik	37.8975	0.0895869	0.254614	0.351854	0.724948	0.999317
9330182L06Rik	130.779	0.00531876	0.15267	0.0348383	0.972209	0.999317
9430015G10Rik	43.5976	-0.163376	0.229871	-0.710729	0.477252	0.999317
9430016H08Rik	85.6781	0.165788	0.181432	0.913771	0.360837	0.999317
9430020K01Rik	153.981	-0.219613	0.165119	-1.33002	0.18351	0.999317
9530059O14Rik	183.426	-0.0758541	0.154449	-0.491126	0.623337	0.999317
9630033F20Rik	90.131	0.0960043	0.171957	0.558303	0.576638	0.999317
9930021J03Rik	532.22	-0.137156	0.127763	-1.07352	0.283036	0.999317
9930104L06Rik	34.5937	-0.427959	0.239481	-1.78702	0.073934	0.999317
A130010J15Rik	35.4064	0.241467	0.254748	0.947865	0.343198	0.999317
A130014A01Rik	43.9741	-0.261392	0.224452	-1.16458	0.244191	0.999317
A230046K03Rik	236.109	-0.0223076	0.134593	-0.165741	0.868361	0.999317
A230050P20Rik	97.9993	-0.123023	0.181987	-0.676001	0.49904	0.999317
A330008L17Rik	33.607	0.238409	0.281412	0.847187	0.396891	0.999317
A330017A19Rik	71.0385	0.149122	0.23093	0.645746	0.518444	0.999317
A330023F24Rik	520.686	0.0242161	0.12533	0.193219	0.846787	0.999317
A330050F15Rik	148.08	0.156069	0.160424	0.972855	0.330625	0.999317
A330102I10Rik	56.1871	-0.163755	0.304771	-0.537306	0.591056	0.999317
A430005L14Rik	85.1194	0.230473	0.215143	1.07125	0.284055	0.999317
A430033K04Rik	65.5838	-0.124772	0.18978	-0.65746	0.510885	0.999317
A430046D13Rik	41.8811	-0.295815	0.235603	-1.25556	0.209274	0.999317
A430105I19Rik	34.1161	-0.0252722	0.275422	-0.0917582	0.92689	0.999317
A530054K11Rik	32.7599	-0.197341	0.277458	-0.711248	0.47693	0.999317
A530058N18Rik	39.6703	-0.342501	0.350014	-0.978535	0.32781	0.999317
A630072M18Rik	35.0134	0.208488	0.336471	0.619631	0.535501	0.999317
A730017C20Rik	167.67	0.0622491	0.176272	0.353142	0.723982	0.999317
A730017L22Rik	49.9073	-0.0215556	0.223265	-0.096547	0.923086	0.999317
A830010M20Rik	372.398	-0.0951639	0.112267	-0.847659	0.396628	0.999317
A830018L16Rik	41.9789	0.0492533	0.281426	0.175013	0.861069	0.999317
A830039N20Rik	290.177	0.162661	0.11108	1.46436	0.143097	0.999317
A830080D01Rik	70.016	-0.343508	0.224751	-1.5284	0.126414	0.999317
A830082K12Rik	86.9027	-0.145465	0.19134	-0.760244	0.447109	0.999317
A930005H10Rik	71.4071	0.351731	0.211689	1.66155	0.0966033	0.999317
A930011G23Rik	60.8426	-0.0402103	0.305192	-0.131754	0.895179	0.999317
A930011O12Rik	833.593	-0.0463549	0.159177	-0.291216	0.770886	0.999317
A930024E05Rik	57.5684	-0.142267	0.236742	-0.600937	0.547882	0.999317
AA465934	213.838	0.260554	0.481721	0.540881	0.58859	0.999317
AA987161	31.7184	0.181792	0.242796	0.748743	0.454012	0.999317
AF529169	115.905	0.156744	0.162435	0.96497	0.33456	0.999317
AI118078	55.0599	-0.0252841	0.223429	-0.113164	0.909901	0.999317
AI314180	363.131	-0.0403565	0.151001	-0.26726	0.789269	0.999317
AI413582	160.94	-0.129536	0.166674	-0.77718	0.437053	0.999317
AI464131	47.682	0.295871	0.233467	1.2673	0.20505	0.999317
AI480526	147.404	-0.070876	0.236253	-0.3	0.764177	0.999317
AI504432	72.9095	0.121743	0.250065	0.486848	0.626366	0.999317
AI593442	187.375	0.101655	0.164224	0.619004	0.535914	0.999317
AI597479	86.42	0.169354	0.190141	0.890675	0.373104	0.999317
AI837181	245.814	-0.0815581	0.15666	-0.520605	0.602642	0.999317
AI854517	67.4382	0.242618	0.235807	1.02888	0.303535	0.999317
AI854703	43.8255	-0.0280321	0.206604	-0.135681	0.892074	0.999317
AI987944	87.5251	0.142395	0.203454	0.699887	0.483998	0.999317
AK010878	37.3378	-0.392351	0.24252	-1.61781	0.105704	0.999317
AK129341	163.909	-0.0241444	0.13518	-0.17861	0.858244	0.999317
AK157302	71.1527	0.214752	0.206244	1.04125	0.297758	0.999317
AU019823	126.317	-0.0432017	0.19631	-0.220068	0.825818	0.999317
AU022252	82.4551	0.257353	0.206713	1.24498	0.21314	0.999317
AU040320	153.012	-0.197176	0.128743	-1.53155	0.125635	0.999317
AU041133	33.3527	-0.0595689	0.267271	-0.222878	0.82363	0.999317
AW047730	43.1071	0.332646	0.294924	1.1279	0.259361	0.999317
AW209491	73.3456	-0.01042	0.230387	-0.0452282	0.963925	0.999317
AW549877	91.8303	-0.117001	0.198494	-0.589445	0.555563	0.999317
AW551984	35.4852	-0.0444735	0.303192	-0.146685	0.883381	0.999317
AW554918	109.199	-0.205161	0.170655	-1.20219	0.229289	0.999317
Aaas	43.5179	-0.0683898	0.290397	-0.235505	0.813817	0.999317
Aacs	46.6357	0.473581	0.258475	1.83221	0.0669202	0.999317
Aagab	182.332	0.258237	0.143667	1.79746	0.0722624	0.999317
Aak1	424.801	0.0560363	0.153382	0.365337	0.71486	0.999317
Aamdc	88.7169	0.0387956	0.172691	0.224653	0.822249	0.999317
Aamp	655.42	0.0781148	0.128842	0.606285	0.544326	0.999317
Aar2	58.4603	-0.0880835	0.247457	-0.355955	0.721875	0.999317
Aars	422.591	0.0551928	0.106276	0.519337	0.603526	0.999317
Aars2	38.4227	-0.32234	0.260034	-1.23961	0.21512	0.999317
Aasdhppt	57.4277	-0.176906	0.251065	-0.704623	0.481045	0.999317
Aatf	58.1888	0.159763	0.249634	0.639988	0.52218	0.999317
Aatk	1148.97	0.180748	0.0996332	1.81413	0.0696572	0.999317
Abat	640.874	-0.00219794	0.120126	-0.018297	0.985402	0.999317
Abca1	109.544	0.242801	0.207976	1.16745	0.24303	0.999317
Abca2	1106.14	-0.0480843	0.119149	-0.403566	0.686532	0.999317
Abca3	129.586	-0.0212237	0.177995	-0.119238	0.905087	0.999317
Abca5	180.584	-0.154181	0.143236	-1.07641	0.281745	0.999317
Abca7	80.5224	0.206389	0.202806	1.01767	0.308835	0.999317
Abca8b	67.4153	-0.0599257	0.206231	-0.290575	0.771376	0.999317
Abcb10	109.027	0.0353107	0.158491	0.222793	0.823697	0.999317
Abcb1a	155.48	0.0922083	0.142831	0.645576	0.518554	0.999317
Abcb7	71.7834	-0.29311	0.203152	-1.44281	0.149073	0.999317
Abcb8	65.2799	0.140551	0.19232	0.730819	0.46489	0.999317
Abcb9	105.657	0.166759	0.167232	0.997174	0.31868	0.999317
Abcc1	77.3698	-0.135768	0.220176	-0.616636	0.537475	0.999317
Abcc5	397.018	-0.0998372	0.100477	-0.993635	0.320401	0.999317
Abcc8	75.0465	-0.433391	0.224883	-1.92719	0.0539564	0.999317
Abcd1	53.2295	-0.0181888	0.290775	-0.0625529	0.950123	0.999317
Abcd2	148.483	-0.187738	0.178894	-1.04944	0.293977	0.999317
Abcd3	268.538	0.265567	0.131153	2.02486	0.0428819	0.999317
Abce1	121.034	0.254752	0.191803	1.3282	0.184112	0.999317
Abcf1	273.85	-0.126029	0.111297	-1.13237	0.257478	0.999317
Abcf2	75.3176	-0.422145	0.224	-1.88458	0.0594869	0.999317
Abcf3	114.943	0.419224	0.231976	1.80718	0.0707339	0.999317
Abcg1	116.89	0.175426	0.219346	0.79977	0.423844	0.999317
Abcg2	79.9512	-0.00663741	0.199538	-0.0332639	0.973464	0.999317
Abcg4	117.657	-0.0320032	0.155141	-0.206285	0.836568	0.999317
Abhd1	40.893	0.245865	0.281182	0.874399	0.381901	0.999317
Abhd10	76.2086	0.224969	0.179588	1.2527	0.210317	0.999317
Abhd11	54.5501	-0.390892	0.236625	-1.65195	0.098545	0.999317
Abhd12	453.835	-0.106531	0.120754	-0.882218	0.377659	0.999317
Abhd13	107.883	-0.0387126	0.20226	-0.1914	0.848212	0.999317
Abhd14a	46.9921	-0.47968	0.303043	-1.58288	0.11345	0.999317
Abhd14b	61.4193	-0.197052	0.223998	-0.879707	0.379018	0.999317
Abhd16a	478.474	0.22071	0.147591	1.49541	0.134807	0.999317
Abhd17a	183.223	-0.0827539	0.132529	-0.624421	0.532351	0.999317
Abhd17b	417.571	0.0339255	0.122169	0.277693	0.781248	0.999317
Abhd17c	97.1761	0.136261	0.20007	0.681064	0.495831	0.999317
Abhd2	182.436	0.143774	0.158727	0.905794	0.365045	0.999317
Abhd3	124.519	0.0837958	0.195683	0.428222	0.66849	0.999317
Abhd4	151.165	-0.0125756	0.174351	-0.0721281	0.9425	0.999317
Abhd5	55.9391	0.0959027	0.19279	0.497447	0.618874	0.999317
Abhd6	233.207	0.051938	0.132526	0.391908	0.695126	0.999317
Abhd8	298.606	0.0719573	0.159062	0.452386	0.650991	0.999317
Abi1	167.558	0.0354343	0.159696	0.221885	0.824403	0.999317
Abi2	602.836	0.180572	0.118648	1.52191	0.128031	0.999317
Abi3bp	59.2043	0.129939	0.222112	0.585014	0.558538	0.999317
Abl1	87.1207	0.316439	0.210506	1.50323	0.13278	0.999317
Abl2	220.934	-0.215207	0.125989	-1.70814	0.0876105	0.999317
Ablim1	785.239	-0.216592	0.121075	-1.78892	0.0736282	0.999317
Ablim2	265.566	0.107023	0.117485	0.910948	0.362323	0.999317
Ablim3	195.832	0.023333	0.135508	0.172189	0.863289	0.999317
Abr	304.274	0.225997	0.172711	1.30853	0.190693	0.999317
Abt1	49.5418	-0.230522	0.259845	-0.887151	0.374998	0.999317
Abtb1	63.3862	0.267633	0.194583	1.37541	0.169003	0.999317
Abtb2	54.4331	0.065734	0.250049	0.262885	0.792639	0.999317
Acaa1a	80.2147	0.0379068	0.236933	0.15999	0.872889	0.999317
Acaa2	75.9249	0.014444	0.185549	0.0778446	0.937952	0.999317
Acaca	135.785	-0.0716643	0.138738	-0.516545	0.605474	0.999317
Acad11	36.0949	-0.0826238	0.275209	-0.300222	0.764008	0.999317
Acad8	74.657	0.233066	0.19183	1.21496	0.22438	0.999317
Acad9	69.3875	-0.246841	0.234613	-1.05212	0.292744	0.999317
Acadl	183.661	0.0676757	0.142809	0.473889	0.635579	0.999317
Acads	33.4064	-0.0686862	0.258032	-0.266193	0.790091	0.999317
Acadsb	261.904	0.0905752	0.107675	0.841192	0.400241	0.999317
Acadvl	140.199	-0.176108	0.138353	-1.27289	0.203058	0.999317
Acap2	147.292	-0.0142378	0.216168	-0.0658646	0.947486	0.999317
Acap3	125.642	0.0709577	0.185393	0.382742	0.701911	0.999317
Acat1	319.125	0.249825	0.172863	1.44522	0.148396	0.999317
Acat2	122.203	-0.158162	0.186529	-0.847919	0.396483	0.999317
Acbd3	355.139	-0.144696	0.103719	-1.39508	0.162993	0.999317
Acbd4	161.106	0.113437	0.148766	0.762516	0.445752	0.999317
Acbd5	300.678	-0.127301	0.1098	-1.15939	0.246297	0.999317
Acbd6	170.233	0.0360311	0.120952	0.297896	0.765782	0.999317
Acd	119.833	-0.0319365	0.140417	-0.227441	0.820081	0.999317
Acer2	31.6162	0.642942	0.344289	1.86745	0.0618387	0.999317
Acer3	42.4626	0.103128	0.22388	0.46064	0.645057	0.999317
Ache	94.9026	0.0386198	0.193301	0.19979	0.841644	0.999317
Acin1	754.474	-0.199729	0.0992332	-2.01272	0.0441442	0.999317
Ackr1	283.637	0.197507	0.166162	1.18864	0.234582	0.999317
Acly	307.368	0.0783821	0.118578	0.66102	0.5086	0.999317
Acn9	58.8959	-0.0956468	0.199213	-0.480122	0.631141	0.999317
Aco1	45.4159	0.292048	0.234132	1.24737	0.212263	0.999317
Aco2	1102.86	0.126476	0.150646	0.839555	0.401158	0.999317
Acot11	63.2707	0.197263	0.220267	0.895564	0.370486	0.999317
Acot13	484.793	-0.072961	0.141665	-0.515023	0.606537	0.999317
Acot2	65.4159	-0.121645	0.267663	-0.454469	0.649491	0.999317
Acot7	1041.09	0.0413063	0.10323	0.40014	0.689054	0.999317
Acot8	60.7696	0.0223276	0.212995	0.104827	0.916513	0.999317
Acot9	36.3568	0.0954663	0.252446	0.378165	0.705308	0.999317
Acox1	148.599	0.187291	0.15769	1.18771	0.234946	0.999317
Acox3	124.701	0.101502	0.183574	0.552919	0.580319	0.999317
Acp1	71.2953	-0.225963	0.720229	-0.313738	0.75372	0.999317
Acp2	184.542	-0.00619926	0.130011	-0.0476826	0.961969	0.999317
Acp6	32.4967	-0.153049	0.226976	-0.674299	0.500121	0.999317
Acrbp	61.7361	0.0890114	0.251764	0.353551	0.723675	0.999317
Acsbg1	513.828	-0.103292	0.102126	-1.01142	0.311813	0.999317
Acsl1	153.339	-0.0148248	0.149722	-0.0990157	0.921126	0.999317
Acsl3	1192.71	0.107832	0.0863431	1.24888	0.211708	0.999317
Acsl4	147.155	0.323463	0.188769	1.71354	0.0866127	0.999317
Acsl5	51.5523	0.330494	0.212209	1.5574	0.119375	0.999317
Acsl6	520.673	0.135142	0.120645	1.12016	0.262644	0.999317
Acss1	41.0025	0.294689	0.278628	1.05764	0.290219	0.999317
Acss2	91.6947	-0.0696936	0.195481	-0.356523	0.721449	0.999317
Actb	5336.01	-0.0711634	0.131078	-0.542908	0.587193	0.999317
Actl6a	102.568	-0.114963	0.164664	-0.698167	0.485073	0.999317
Actl6b	235.08	0.0615837	0.191025	0.322385	0.747161	0.999317
Actn1	152.49	0.187479	0.155074	1.20897	0.226676	0.999317
Actn4	344.077	0.282855	0.163751	1.72735	0.0841053	0.999317
Actr10	425.031	0.0165416	0.0903853	0.183012	0.854788	0.999317
Actr1a	243.192	-0.246441	0.148993	-1.65404	0.0981199	0.999317
Actr1b	510.298	-0.146712	0.10699	-1.37128	0.170289	0.999317
Actr2	328.091	0.0656075	0.135572	0.48393	0.628436	0.999317
Actr3	129.404	0.128616	0.151922	0.846593	0.397222	0.999317
Actr5	39.341	0.0326217	0.267143	0.122113	0.902809	0.999317
Actr6	68.0584	0.066866	0.206463	0.323864	0.746041	0.999317
Actr8	180.63	-0.122647	0.152346	-0.805059	0.420785	0.999317
Acvr1	78.2159	0.227786	0.45154	0.504466	0.613934	0.999317
Acvr1b	105.678	0.182364	0.20387	0.894511	0.371048	0.999317
Acvr1c	75.9811	0.198361	0.217656	0.91135	0.362111	0.999317
Acvr2a	48.0165	0.255846	0.269741	0.948487	0.342882	0.999317
Acvr2b	38.3622	-0.210803	0.255844	-0.823952	0.409967	0.999317
Acvrl1	31.7156	0.0916306	0.275317	0.332819	0.739271	0.999317
Acyp1	90.9442	0.25666	0.233966	1.097	0.272643	0.999317
Acyp2	31.7479	-0.167283	0.279382	-0.598761	0.549332	0.999317
Adal	68.636	0.195598	0.182333	1.07275	0.283383	0.999317
Adam10	272.334	-0.0474919	0.11894	-0.399293	0.689678	0.999317
Adam11	479.2	0.117841	0.148567	0.793186	0.42767	0.999317
Adam15	180.782	-0.269332	0.193967	-1.38855	0.16497	0.999317
Adam17	72.8925	0.066408	0.189453	0.350525	0.725945	0.999317
Adam19	49.561	-0.162394	0.24163	-0.672076	0.501535	0.999317
Adam22	529.758	0.067364	0.158437	0.425179	0.670707	0.999317
Adam23	453.447	0.0490442	0.0995648	0.492585	0.622306	0.999317
Adamts10	182.672	-0.300967	0.16796	-1.7919	0.0731487	0.999317
Adamts2	39.8256	0.298365	0.239041	1.24817	0.211967	0.999317
Adamts3	34.2717	-0.00256905	0.310218	-0.00828144	0.993392	0.999317
Adamts4	106.76	-0.125321	0.233139	-0.537537	0.590897	0.999317
Adamtsl1	41.3685	0.454127	0.249803	1.81794	0.0690729	0.999317
Adamtsl4	45.6009	0.435151	0.246077	1.76835	0.0770023	0.999317
Adap1	141.61	-0.272103	0.168098	-1.61872	0.105508	0.999317
Adap2	34.9362	-0.364557	0.359198	-1.01492	0.310144	0.999317
Adar	240.453	0.0271147	0.11802	0.229747	0.818289	0.999317
Adarb1	483.306	-0.115864	0.0989253	-1.17123	0.241506	0.999317
Adck1	56.219	0.202292	0.197722	1.02311	0.306254	0.999317
Adck3	42.8695	-0.187099	0.261854	-0.714515	0.474909	0.999317
Adck4	35.019	-0.208133	0.301137	-0.691157	0.489467	0.999317
Adcy1	2394.84	0.131326	0.144561	0.90845	0.363641	0.999317
Adcy2	84.1043	0.00938501	0.204639	0.0458613	0.963421	0.999317
Adcy3	48.6433	-0.116842	0.225948	-0.51712	0.605072	0.999317
Adcy5	95.4623	0.24679	0.168159	1.4676	0.142213	0.999317
Adcy6	53.2056	-0.141243	0.260978	-0.541205	0.588367	0.999317
Adcy9	137.236	-0.0595498	0.150201	-0.396468	0.69176	0.999317
Adcyap1r1	518.125	0.00801554	0.134088	0.0597782	0.952332	0.999317
Add2	98.1638	-0.248394	0.201692	-1.23155	0.218117	0.999317
Add3	702.048	-0.105786	0.109845	-0.963046	0.335524	0.999317
Adh5	133.87	0.0968229	0.15036	0.64394	0.519614	0.999317
Adi1	39.9851	-0.108617	0.243983	-0.445184	0.656186	0.999317
Adipor1	119.024	0.0736202	0.179015	0.411251	0.680888	0.999317
Adipor2	267.405	0.117939	0.130556	0.903361	0.366334	0.999317
Adk	186.072	0.028887	0.130247	0.221786	0.82448	0.999317
Ado	153.914	-0.0663269	0.148697	-0.446053	0.655559	0.999317
Adora1	889.888	-0.122138	0.113986	-1.07152	0.283937	0.999317
Adprh	252.7	-0.0384875	0.122341	-0.314592	0.753072	0.999317
Adprhl2	45.349	0.139964	0.265383	0.527406	0.597912	0.999317
Adprm	35.7741	0.371587	0.284649	1.30542	0.191749	0.999317
Adra1b	48.455	-0.439141	0.301498	-1.45653	0.145247	0.999317
Adra2a	73.6012	0.168803	0.207895	0.811966	0.416811	0.999317
Adra2c	33.218	0.484164	0.321234	1.5072	0.13176	0.999317
Adrb1	43.2752	-0.135466	0.235837	-0.574405	0.565694	0.999317
Adrbk1	369.855	-0.0712157	0.134597	-0.529102	0.596734	0.999317
Adrbk2	220.867	0.0813277	0.169241	0.480544	0.630841	0.999317
Adrm1	210.023	0.0843642	0.144533	0.583701	0.559421	0.999317
Adsl	45.4719	-0.0221696	0.243011	-0.0912285	0.927311	0.999317
Adss	185.541	0.0316914	0.120678	0.262611	0.79285	0.999317
Adssl1	49.0794	0.16071	0.236115	0.680642	0.496098	0.999317
Aebp1	50.3814	-0.114177	0.265116	-0.43067	0.666708	0.999317
Aebp2	183.409	0.20691	0.175192	1.18104	0.237586	0.999317
Aen	42.4345	-0.231788	0.280318	-0.826875	0.408308	0.999317
Aes	1257.85	0.0158964	0.112277	0.141582	0.88741	0.999317
Afap1	89.0496	0.0131176	0.177252	0.0740055	0.941006	0.999317
Afap1l2	70.4014	0.0517016	0.207965	0.248607	0.803665	0.999317
Aff1	102.736	-0.0487027	0.168434	-0.289151	0.772466	0.999317
Aff2	34.3168	-0.181947	0.3495	-0.520592	0.602651	0.999317
Aff3	101.642	-0.191826	0.176402	-1.08744	0.276844	0.999317
Aff4	529.315	-0.158436	0.112524	-1.40802	0.159124	0.999317
Afg3l1	179.986	-0.0855422	0.125941	-0.679227	0.496994	0.999317
Afg3l2	130.057	0.252371	0.199411	1.26558	0.205663	0.999317
Aftph	490.502	-0.101722	0.100001	-1.01722	0.309051	0.999317
Aga	43.3069	0.161341	0.241922	0.666914	0.504827	0.999317
Agap1	1192.85	0.00897876	0.0827773	0.108469	0.913624	0.999317
Agap2	208.148	0.0552425	0.181442	0.304463	0.760775	0.999317
Agap3	235.444	-0.0791423	0.139959	-0.565469	0.571755	0.999317
Agfg1	390.728	0.112349	0.121032	0.928263	0.353271	0.999317
Agfg2	214.955	0.0407654	0.135502	0.300848	0.76353	0.999317
Aggf1	289.653	-0.178373	0.112174	-1.59015	0.111802	0.999317
Agl	247.962	0.0384263	0.123814	0.310355	0.756291	0.999317
Ago1	145.154	0.285548	0.157389	1.81428	0.0696348	0.999317
Ago2	480.47	0.123278	0.1356	0.909128	0.363282	0.999317
Ago3	312.344	-0.215973	0.129343	-1.66977	0.0949645	0.999317
Ago4	56.9378	0.074308	0.25974	0.286086	0.774812	0.999317
Agpat1	193.066	-0.182837	0.157699	-1.15941	0.246291	0.999317
Agpat3	475.357	0.134258	0.0936325	1.43388	0.151607	0.999317
Agpat4	180.638	-0.0809848	0.147869	-0.547681	0.583911	0.999317
Agpat5	307.765	0.0849555	0.138356	0.614038	0.53919	0.999317
Agpat6	264.649	0.0364339	0.172078	0.211729	0.832319	0.999317
Agps	91.8109	0.232096	0.202739	1.1448	0.252292	0.999317
Agrn	221.927	-0.111458	0.149991	-0.743102	0.45742	0.999317
Agt	197.141	-0.31351	0.162872	-1.92489	0.054243	0.999317
Agtpbp1	1347.77	-0.0366778	0.0900018	-0.407522	0.683624	0.999317
Agtrap	41.5692	0.0906374	0.284715	0.318344	0.750224	0.999317
Ahctf1	118.28	-0.316709	0.173798	-1.82228	0.0684128	0.999317
Ahcyl1	1282.57	0.0926692	0.0776707	1.1931	0.232829	0.999317
Ahcyl2	335.237	-0.00305296	0.11533	-0.0264716	0.978881	0.999317
Ahdc1	315.567	-0.0602652	0.170919	-0.352596	0.724392	0.999317
Ahi1	1660.76	-0.117104	0.105547	-1.1095	0.267216	0.999317
Ahnak	147.063	0.020869	0.188498	0.110712	0.911844	0.999317
Ahnak2	64.4667	0.229001	0.427409	0.535789	0.592105	0.999317
Ahsa1	61.9634	0.168185	0.261788	0.642446	0.520583	0.999317
Ahsa2	68.0966	-0.122653	0.205286	-0.597471	0.550193	0.999317
Aida	99.4685	-0.187784	0.180105	-1.04264	0.297116	0.999317
Aif1l	36.7333	0.195426	0.309851	0.630711	0.52823	0.999317
Aifm1	143.334	-0.16027	0.15202	-1.05427	0.291761	0.999317
Aifm2	34.7232	0.520323	0.295007	1.76377	0.077771	0.999317
Aifm3	529.629	-0.157787	0.143144	-1.1023	0.270332	0.999317
Aig1	498.725	0.00506432	0.0912926	0.0554736	0.955761	0.999317
Aimp1	437.578	-0.0350132	0.10896	-0.321339	0.747954	0.999317
Aimp2	89.395	-0.301043	0.158729	-1.89658	0.057883	0.999317
Aip	166.956	0.0457535	0.16444	0.278238	0.78083	0.999317
Airn	85.7671	0.00670786	0.230107	0.0291511	0.976744	0.999317
Ajap1	182.142	0.132537	0.129413	1.02414	0.305768	0.999317
Ak1	186.401	0.128075	0.173438	0.738452	0.46024	0.999317
Ak2	108.251	0.0490615	0.160327	0.306009	0.759598	0.999317
Ak3	168.004	0.007766	0.144881	0.0536026	0.957252	0.999317
Ak4	170.872	0.0319483	0.195594	0.16334	0.87025	0.999317
Ak6	160.484	0.0299973	0.151096	0.198531	0.842629	0.999317
Akap1	57.8112	0.0704593	0.238455	0.295483	0.767625	0.999317
Akap10	62.8928	-0.249461	0.230064	-1.08431	0.278227	0.999317
Akap11	771.479	-0.109245	0.0962457	-1.13507	0.256348	0.999317
Akap12	530.198	-0.0383145	0.0980958	-0.390583	0.696106	0.999317
Akap13	88.4749	0.0447844	0.192017	0.233232	0.815582	0.999317
Akap17b	216.656	0.00786407	0.128488	0.0612048	0.951196	0.999317
Akap6	627.207	-0.0133907	0.128817	-0.103951	0.917208	0.999317
Akap7	499.846	0.125661	0.11014	1.14092	0.253903	0.999317
Akap8	243.643	-0.136241	0.132076	-1.03154	0.302288	0.999317
Akap8l	362.29	-0.156983	0.165141	-0.950602	0.341807	0.999317
Akap9	1611.33	-0.161045	0.0900767	-1.78787	0.0737975	0.999317
Akirin1	53.3695	0.180907	0.265043	0.682558	0.494886	0.999317
Akirin2	238.448	0.132248	0.199622	0.662492	0.507656	0.999317
Akr1a1	618.333	0.104796	0.0956463	1.09566	0.273229	0.999317
Akr1e1	42.3516	0.150506	0.373459	0.403006	0.686944	0.999317
Akr7a5	106.398	0.0982379	0.176869	0.555427	0.578603	0.999317
Akt2	174.801	0.0564108	0.159715	0.353196	0.723942	0.999317
Akt3	361.848	-0.0121061	0.135292	-0.0894813	0.928699	0.999317
Aktip	368.968	-0.0833949	0.110173	-0.756945	0.449083	0.999317
Alad	154.041	0.0687038	0.218667	0.314194	0.753374	0.999317
Alas1	130.12	0.219338	0.202767	1.08173	0.279375	0.999317
Alas2	41.6513	0.0367269	0.271929	0.135061	0.892564	0.999317
Alcam	438.996	-0.209586	0.107541	-1.9489	0.0513073	0.999317
Aldh1a1	419.686	0.0404493	0.122805	0.329378	0.74187	0.999317
Aldh1l1	67.0072	0.0301522	0.197636	0.152564	0.878742	0.999317
Aldh2	344.87	-0.280395	0.170474	-1.6448	0.100012	0.999317
Aldh3a2	82.0605	0.176264	0.222467	0.792318	0.428175	0.999317
Aldh4a1	46.6667	-0.100911	0.244025	-0.413529	0.679219	0.999317
Aldh5a1	145.621	0.0368881	0.173428	0.2127	0.831561	0.999317
Aldh6a1	68.4245	0.284372	0.245597	1.15788	0.246914	0.999317
Aldh7a1	103.951	-0.31656	0.202325	-1.56461	0.117675	0.999317
Aldh9a1	124.935	-0.0974212	0.150283	-0.648253	0.516821	0.999317
Aldoa	2664.77	-0.0820672	0.0856681	-0.957967	0.33808	0.999317
Aldoc	5660	0.0773365	0.0944427	0.818872	0.412859	0.999317
Alg1	137.176	0.00682445	0.137322	0.0496967	0.960364	0.999317
Alg11	273.972	-0.195436	0.142449	-1.37198	0.170071	0.999317
Alg2	163.322	-0.100379	0.14124	-0.710698	0.477271	0.999317
Alg5	86.661	-0.0503841	0.172438	-0.292186	0.770144	0.999317
Alg6	78.0039	-0.214287	0.166641	-1.28592	0.19847	0.999317
Alg8	40.3084	-0.103737	0.299077	-0.346858	0.728698	0.999317
Alg9	33.1554	-0.0288594	0.365324	-0.0789968	0.937035	0.999317
Alkbh1	61.314	0.143591	0.188321	0.762481	0.445773	0.999317
Alkbh3	42.1283	0.353239	0.221123	1.59747	0.11016	0.999317
Alkbh4	38.5209	-0.274222	0.228086	-1.20228	0.229257	0.999317
Alkbh5	177.732	0.207067	0.187921	1.10188	0.270512	0.999317
Alkbh6	119.788	0.0076286	0.162773	0.0468664	0.96262	0.999317
Alkbh7	104.934	-0.0865282	0.151952	-0.569444	0.569055	0.999317
Alkbh8	189.905	-0.07648	0.159725	-0.478823	0.632064	0.999317
Alms1	113.85	-0.227809	0.166268	-1.37013	0.170646	0.999317
Als2	181.178	0.00268606	0.188002	0.0142874	0.988601	0.999317
Ambra1	138.952	-0.0193821	0.147178	-0.131692	0.895228	0.999317
Amd1	156.608	-0.0190401	0.162043	-0.117501	0.906463	0.999317
Amdhd2	40.7474	-0.146096	0.301169	-0.485097	0.627608	0.999317
Amer1	77.7816	-0.200763	0.172598	-1.16319	0.244754	0.999317
Amer2	308.76	-0.189122	0.12587	-1.50251	0.132964	0.999317
Amer3	78.5258	-0.200086	0.18365	-1.08949	0.275936	0.999317
Amigo1	76.5948	0.289194	0.161934	1.78588	0.0741195	0.999317
Amigo2	68.5856	-0.0830915	0.252957	-0.328481	0.742548	0.999317
Ammecr1l	232.743	-0.1278	0.105046	-1.21661	0.223754	0.999317
Amot	154.405	0.0859799	0.152432	0.564055	0.572717	0.999317
Amotl1	404.386	-0.10419	0.171999	-0.60576	0.544674	0.999317
Amotl2	78.6492	0.157953	0.176092	0.896989	0.369725	0.999317
Ampd2	123.81	0.166146	0.1653	1.00512	0.31484	0.999317
Ampd3	49.7125	0.0691536	0.209326	0.330364	0.741125	0.999317
Amph	517.46	-0.0154384	0.0835424	-0.184797	0.853388	0.999317
Amt	76.9034	0.215507	0.176175	1.22326	0.221232	0.999317
Amy1	73.0939	0.135759	0.197497	0.687396	0.491833	0.999317
Amz2	150.891	0.00344948	0.156565	0.0220322	0.982422	0.999317
Anapc1	126.131	-0.111297	0.137023	-0.81225	0.416648	0.999317
Anapc10	34.3461	0.287803	0.286181	1.00567	0.314575	0.999317
Anapc11	537.555	-0.177844	0.126222	-1.40897	0.158844	0.999317
Anapc13	203.359	-0.0604406	0.15252	-0.396281	0.691898	0.999317
Anapc16	190.486	0.195652	0.147743	1.32427	0.185412	0.999317
Anapc2	169.584	-0.139745	0.167307	-0.835263	0.40357	0.999317
Anapc4	236.381	-0.183213	0.163139	-1.12305	0.261415	0.999317
Anapc5	291.946	-0.148888	0.149397	-0.996595	0.318961	0.999317
Anapc7	71.5616	0.175438	0.201435	0.87094	0.383787	0.999317
Angel2	218.117	0.107313	0.138799	0.773155	0.439431	0.999317
Angpt1	63.1296	-0.0479607	0.238152	-0.201387	0.840396	0.999317
Angptl6	38.2371	0.341912	0.295816	1.15583	0.247752	0.999317
Ank	541.288	-0.0272989	0.103059	-0.264886	0.791098	0.999317
Ank1	851.401	-0.0363702	0.120762	-0.301173	0.763283	0.999317
Ank3	3190.25	0.0409789	0.0754008	0.543482	0.586798	0.999317
Ankfy1	138.921	0.00487924	0.150319	0.0324592	0.974106	0.999317
Ankhd1	1391.4	-0.181248	0.146754	-1.23504	0.216815	0.999317
Ankle2	93.9278	-0.219306	0.157996	-1.38805	0.165123	0.999317
Ankmy2	138.408	-0.0774267	0.161727	-0.47875	0.632116	0.999317
Ankra2	241.894	-0.149534	0.170241	-0.878369	0.379744	0.999317
Ankrd10	165.209	0.0166545	0.129941	0.128169	0.898015	0.999317
Ankrd11	1636.85	-0.0780531	0.0964961	-0.808873	0.418588	0.999317
Ankrd12	2264.98	-0.10896	0.123872	-0.879613	0.379069	0.999317
Ankrd13a	141.473	0.00646523	0.14299	0.0452146	0.963936	0.999317
Ankrd13b	76.7884	0.00704604	0.191408	0.0368117	0.970635	0.999317
Ankrd13d	75.7821	0.0130487	0.216647	0.0602302	0.951972	0.999317
Ankrd16	102.66	0.110259	0.177306	0.621857	0.534036	0.999317
Ankrd17	665.65	-0.0497626	0.110221	-0.451479	0.651645	0.999317
Ankrd24	159.577	-0.204331	0.14559	-1.40347	0.160476	0.999317
Ankrd26	251.675	-0.151417	0.130458	-1.16066	0.24578	0.999317
Ankrd27	95.1749	-0.0176598	0.202039	-0.0874076	0.930348	0.999317
Ankrd28	63.5551	-0.126308	0.248694	-0.507884	0.611535	0.999317
Ankrd29	63.4566	0.238086	0.213453	1.1154	0.264678	0.999317
Ankrd32	142.682	-0.207126	0.160016	-1.29441	0.195523	0.999317
Ankrd34a	120.747	-0.299754	0.185713	-1.61407	0.106511	0.999317
Ankrd34b	155.369	-0.137614	0.15106	-0.910991	0.3623	0.999317
Ankrd39	58.0268	0.045097	0.196297	0.229738	0.818295	0.999317
Ankrd40	478.433	0.116011	0.0955761	1.21381	0.224819	0.999317
Ankrd44	98.793	-0.000701984	0.169362	-0.00414487	0.996693	0.999317
Ankrd45	54.939	-0.403719	0.209547	-1.92663	0.0540262	0.999317
Ankrd46	308.272	-0.0555906	0.127134	-0.437262	0.661921	0.999317
Ankrd49	69.9614	0.328132	0.192403	1.70544	0.0881126	0.999317
Ankrd50	113.914	0.306055	0.170795	1.79194	0.0731427	0.999317
Ankrd52	34.3643	-0.0571435	0.288672	-0.197953	0.843082	0.999317
Ankrd54	51.8948	-0.300193	0.192474	-1.55966	0.118841	0.999317
Ankrd6	96.703	-0.176332	0.224177	-0.786573	0.431532	0.999317
Ankrd9	53.4385	-0.128002	0.262112	-0.48835	0.625302	0.999317
Anks1	97.0976	-0.0769558	0.161537	-0.476397	0.633791	0.999317
Anks1b	1382.79	0.121291	0.105557	1.14907	0.250529	0.999317
Anks3	79.1852	0.060287	0.195119	0.308976	0.75734	0.999317
Ankzf1	85.3098	0.00911775	0.224758	0.0405669	0.967641	0.999317
Anln	127.299	-0.117427	0.181048	-0.648598	0.516598	0.999317
Ano10	39.1872	-0.0784271	0.228286	-0.343547	0.731187	0.999317
Ano3	175.62	-0.18929	0.200406	-0.944532	0.344898	0.999317
Ano4	51.1991	-0.11102	0.218066	-0.509114	0.610672	0.999317
Ano6	99.7773	0.159608	0.163482	0.976304	0.328914	0.999317
Ano8	161.748	-0.00440725	0.173229	-0.0254418	0.979703	0.999317
Anp32a	1225.37	-0.110256	0.0832238	-1.32482	0.185232	0.999317
Anp32b	186.245	-0.150007	0.139758	-1.07333	0.283123	0.999317
Anp32e	487.279	0.0564359	0.112452	0.501869	0.61576	0.999317
Anxa2	61.627	-0.194325	0.291151	-0.667438	0.504493	0.999317
Anxa5	255.764	0.00392059	0.133214	0.0294309	0.976521	0.999317
Anxa6	395.305	-0.183132	0.137105	-1.3357	0.181646	0.999317
Anxa7	87.0761	0.100115	0.160498	0.62378	0.532772	0.999317
Aox1	32.7462	0.0616766	0.285261	0.216211	0.828823	0.999317
Ap1ar	35.2296	-0.541298	0.277951	-1.94746	0.0514795	0.999317
Ap1b1	433.805	-0.066705	0.118192	-0.564377	0.572497	0.999317
Ap1m1	120.452	0.0544367	0.167249	0.325484	0.744815	0.999317
Ap1s1	146.434	-0.119713	0.201476	-0.59418	0.552392	0.999317
Ap1s2	531.301	-0.0897777	0.124398	-0.721698	0.47048	0.999317
Ap2a1	96.9927	0.0458594	0.164967	0.277991	0.781019	0.999317
Ap2a2	358.355	0.0587676	0.118038	0.497872	0.618574	0.999317
Ap2b1	855.726	-0.0837429	0.120809	-0.693184	0.488194	0.999317
Ap2m1	205.74	0.0766929	0.1587	0.483256	0.628914	0.999317
Ap2s1	156.647	-0.182959	0.37735	-0.484853	0.627781	0.999317
Ap3b1	197.596	0.0270402	0.103991	0.260023	0.794846	0.999317
Ap3b2	575.305	-0.0555865	0.0962752	-0.577371	0.563689	0.999317
Ap3d1	511.785	-0.210924	0.107052	-1.9703	0.0488038	0.999317
Ap3m1	115.429	0.0359103	0.157947	0.227357	0.820146	0.999317
Ap3m2	455.344	-0.0460327	0.117918	-0.39038	0.696256	0.999317
Ap3s2	174.376	-0.0635572	0.149089	-0.426304	0.669886	0.999317
Ap4b1	38.1508	-0.377432	0.281639	-1.34013	0.180204	0.999317
Ap4s1	159.515	-0.0551475	0.132474	-0.416289	0.677198	0.999317
Ap5m1	76.5303	0.227119	0.225327	1.00795	0.313477	0.999317
Ap5s1	41.8918	0.0348604	0.217986	0.15992	0.872944	0.999317
Ap5z1	55.6505	0.217389	0.251384	0.86477	0.387165	0.999317
Apba1	701.938	-0.115905	0.146328	-0.792093	0.428306	0.999317
Apba2	182.754	0.0848928	0.154533	0.549349	0.582766	0.999317
Apba3	45.0017	-0.0834588	0.532353	-0.156774	0.875423	0.999317
Apbb1	484.888	0.0187354	0.125061	0.149811	0.880914	0.999317
Apbb2	348.482	0.0699666	0.10641	0.657517	0.510848	0.999317
Apc	1064.85	-0.129104	0.102978	-1.25371	0.209949	0.999317
Apc2	133.165	0.117328	0.165182	0.710296	0.477521	0.999317
Apeh	71.6327	-0.0266387	0.204537	-0.130239	0.896377	0.999317
Apex1	70.7261	0.244917	0.254802	0.961206	0.336448	0.999317
Aph1a	180.815	-0.00484433	0.162773	-0.0297612	0.976257	0.999317
Aph1b	131.958	0.0601362	0.130309	0.46149	0.644447	0.999317
Api5	295.086	0.354312	0.185839	1.90655	0.0565787	0.999317
Apip	67.8217	0.200612	0.295342	0.679252	0.496978	0.999317
Apln	73.809	0.0934973	0.223173	0.418946	0.675255	0.999317
Aplp1	906.819	0.115053	0.108052	1.06479	0.28697	0.999317
Aplp2	1646.25	-0.0236999	0.0759541	-0.31203	0.755018	0.999317
Apoa1bp	262.217	-0.0238324	0.122079	-0.19522	0.84522	0.999317
Apod	1123.5	-0.0102767	0.113601	-0.0904628	0.927919	0.999317
Apoe	5080.9	-0.0878674	0.122432	-0.717683	0.472953	0.999317
Apoo	108.27	0.0747356	0.159581	0.468325	0.639552	0.999317
Apopt1	68.5134	0.423816	0.258769	1.63781	0.10146	0.999317
Appbp2	335.859	0.214606	0.13199	1.62592	0.103967	0.999317
Appl1	597.322	-0.15605	0.0955931	-1.63244	0.102586	0.999317
Appl2	592.551	-0.0918741	0.123113	-0.746261	0.45551	0.999317
Aprt	65.7743	-0.126371	0.182031	-0.69423	0.487538	0.999317
Aptx	80.1304	-0.10683	0.196662	-0.543218	0.58698	0.999317
Aqp4	725.018	0.00557844	0.130602	0.0427132	0.96593	0.999317
Aqp6	85.2883	-0.179036	0.219874	-0.814263	0.415494	0.999317
Aqr	171.579	-0.018261	0.175764	-0.103895	0.917253	0.999317
Ar	137.775	0.219727	0.157716	1.39318	0.163564	0.999317
Araf	158.824	0.249947	0.328912	0.75992	0.447302	0.999317
Arap1	58.6574	0.148018	0.214707	0.689395	0.490575	0.999317
Arap2	577.199	0.0138171	0.0895185	0.154349	0.877335	0.999317
Arc	33.0318	-0.445629	0.306789	-1.45256	0.146346	0.999317
Arcn1	129.731	0.1401	0.176929	0.791847	0.42845	0.999317
Arel1	133.897	0.0343653	0.128952	0.266497	0.789857	0.999317
Arf1	228.203	0.10587	0.132402	0.799611	0.423936	0.999317
Arf2	129.188	0.0191091	0.176883	0.108033	0.91397	0.999317
Arf3	355.118	0.0845108	0.157159	0.537739	0.590757	0.999317
Arf5	470.534	-0.107167	0.143263	-0.748048	0.454431	0.999317
Arf6	313.784	0.0794977	0.122935	0.646664	0.517849	0.999317
Arfgap1	229.811	-0.0347356	0.129906	-0.26739	0.789169	0.999317
Arfgap2	38.8871	0.127453	0.274039	0.465092	0.641866	0.999317
Arfgap3	59.5784	0.16691	0.214329	0.778756	0.436123	0.999317
Arfgef1	422.582	-0.0305592	0.110138	-0.277462	0.781425	0.999317
Arfgef2	140.733	-0.0683845	0.150924	-0.453106	0.650472	0.999317
Arfip1	57.4746	0.106662	0.203293	0.524674	0.59981	0.999317
Arfip2	122.584	-0.186764	0.157901	-1.18279	0.236891	0.999317
Arfrp1	108.116	-0.184306	0.15533	-1.18655	0.235407	0.999317
Arglu1	964.322	-0.0993432	0.0800628	-1.24082	0.214674	0.999317
Arhgap1	61.3121	-0.123463	0.226976	-0.543946	0.586479	0.999317
Arhgap10	64.1499	-0.205783	0.215504	-0.954891	0.339633	0.999317
Arhgap12	244.684	0.108535	0.110055	0.986186	0.324042	0.999317
Arhgap17	41.3843	-0.200181	0.257191	-0.778335	0.436372	0.999317
Arhgap18	44.6119	0.182266	0.27123	0.671997	0.501585	0.999317
Arhgap20	275.773	-0.241315	0.130885	-1.84373	0.0652231	0.999317
Arhgap21	677.341	-0.204782	0.124338	-1.64698	0.0995613	0.999317
Arhgap23	295.177	-0.10211	0.130807	-0.780616	0.435028	0.999317
Arhgap26	478.949	-0.0855246	0.137099	-0.623815	0.532749	0.999317
Arhgap27	41.2814	0.247827	0.251225	0.986476	0.323899	0.999317
Arhgap29	97.7808	-0.208481	0.165932	-1.25642	0.208962	0.999317
Arhgap31	120.618	0.112161	0.19669	0.570242	0.568513	0.999317
Arhgap32	312.116	-0.0674568	0.133587	-0.504964	0.613584	0.999317
Arhgap35	231.368	0.0391109	0.112092	0.348917	0.727151	0.999317
Arhgap39	56.4704	-0.233014	0.220859	-1.05504	0.291409	0.999317
Arhgap42	36.21	-0.342601	0.248069	-1.38107	0.167257	0.999317
Arhgap44	218.48	-0.100866	0.122199	-0.825425	0.409131	0.999317
Arhgap5	1763.83	0.0359578	0.109431	0.328589	0.742467	0.999317
Arhgdia	152.461	0.0302813	0.133752	0.226399	0.820891	0.999317
Arhgdig	57.244	0.38749	0.28846	1.34331	0.179173	0.999317
Arhgef1	58.9635	0.266971	0.20417	1.30759	0.191012	0.999317
Arhgef10	102.681	-0.104696	0.204348	-0.512341	0.608412	0.999317
Arhgef10l	68.024	0.515716	0.304078	1.696	0.0898861	0.999317
Arhgef11	53.2274	-0.220028	0.206992	-1.06298	0.287791	0.999317
Arhgef12	595.531	-0.00105488	0.133977	-0.00787361	0.993718	0.999317
Arhgef15	56.3946	0.109706	0.211628	0.518391	0.604185	0.999317
Arhgef17	315.183	-0.0958048	0.131734	-0.727261	0.467066	0.999317
Arhgef18	145.91	0.0621426	0.151592	0.409934	0.681854	0.999317
Arhgef2	255.7	0.0479584	0.115583	0.414927	0.678195	0.999317
Arhgef25	247.866	0.0176002	0.145299	0.121131	0.903587	0.999317
Arhgef26	195.959	-0.287841	0.147561	-1.95066	0.0510972	0.999317
Arhgef28	36.7883	-0.167052	0.261407	-0.639051	0.52279	0.999317
Arhgef3	173.587	-0.0673578	0.166078	-0.40558	0.685051	0.999317
Arhgef33	154.395	-0.185926	0.180499	-1.03007	0.302978	0.999317
Arhgef4	244.164	-0.133557	0.136053	-0.981655	0.32627	0.999317
Arhgef40	83.6746	-0.0233841	0.206417	-0.113286	0.909804	0.999317
Arhgef6	49.7293	0.126558	0.251746	0.50272	0.615161	0.999317
Arhgef7	664.301	0.00677772	0.133224	0.0508744	0.959426	0.999317
Arhgef9	968.046	0.208448	0.13382	1.55767	0.119311	0.999317
Arid1a	380.755	0.162195	0.127355	1.27356	0.202818	0.999317
Arid2	186.767	0.0124476	0.138275	0.090021	0.928271	0.999317
Arid3a	52.1112	0.0144956	0.228862	0.0633378	0.949498	0.999317
Arid3b	36.0532	-0.439069	0.286971	-1.53001	0.126014	0.999317
Arid4b	1333.85	-0.199111	0.102328	-1.94582	0.0516769	0.999317
Arid5b	184.706	-0.0821707	0.202255	-0.406272	0.684542	0.999317
Arih1	354.688	0.0545073	0.10803	0.504556	0.613871	0.999317
Arih2	219.746	0.127871	0.168597	0.75844	0.448187	0.999317
Arl1	168.734	-0.10682	0.179867	-0.593884	0.55259	0.999317
Arl13b	55.1994	0.0792999	0.223407	0.354958	0.722621	0.999317
Arl14ep	116.009	0.204365	0.170375	1.1995	0.230333	0.999317
Arl15	34.3773	-0.267415	0.278096	-0.96159	0.336256	0.999317
Arl16	73.3149	-0.100522	0.16396	-0.613089	0.539817	0.999317
Arl2	144.427	-0.230041	0.179928	-1.27851	0.201068	0.999317
Arl2bp	329.965	-0.0231327	0.0968304	-0.238899	0.811184	0.999317
Arl3	562.952	-0.111234	0.125086	-0.889254	0.373866	0.999317
Arl4a	182.623	-0.0403005	0.157948	-0.255151	0.798607	0.999317
Arl5a	36.029	0.328186	0.267008	1.22912	0.219025	0.999317
Arl5b	148.441	0.01367	0.155281	0.0880334	0.92985	0.999317
Arl6	50.6409	0.345779	0.272277	1.26995	0.204102	0.999317
Arl6ip1	1172.9	0.0128595	0.125395	0.102552	0.918319	0.999317
Arl6ip4	291.727	0.202078	0.149973	1.34743	0.177842	0.999317
Arl6ip5	84.4351	-0.20813	0.209183	-0.994967	0.319752	0.999317
Arl6ip6	45.9941	-0.0843867	0.191268	-0.441196	0.659071	0.999317
Arl8b	404.403	0.151967	0.0889391	1.70866	0.0875141	0.999317
Armc1	523.157	-0.0418181	0.120536	-0.346935	0.72864	0.999317
Armc10	38.8378	0.32747	0.214524	1.5265	0.126886	0.999317
Armc5	43.9832	0.110043	0.260389	0.422611	0.672579	0.999317
Armc6	35.8157	0.0894905	0.213819	0.418534	0.675557	0.999317
Armc8	246.17	0.336292	0.167027	2.0134	0.044073	0.999317
Armc9	60.0643	-0.073773	0.188477	-0.391417	0.695489	0.999317
Armcx1	122.132	0.275074	0.170049	1.61762	0.105744	0.999317
Armcx2	260.564	-0.00220821	0.144462	-0.0152858	0.987804	0.999317
Armcx4	125.399	0.204342	0.165831	1.23223	0.217862	0.999317
Armcx5	115.662	-0.0499638	0.167222	-0.298788	0.765102	0.999317
Arnt	131.493	-0.0327265	0.14443	-0.22659	0.820743	0.999317
Arnt2	224.014	-0.118716	0.148144	-0.801357	0.422925	0.999317
Arntl	48.8513	0.244361	0.28152	0.868008	0.38539	0.999317
Arpc1b	127.198	0.272942	0.218897	1.24689	0.212437	0.999317
Arpc2	733.724	0.0702134	0.0810198	0.86662	0.38615	0.999317
Arpc3	209.869	-0.0385877	0.146677	-0.263079	0.79249	0.999317
Arpc4	221.609	-0.0410039	0.20632	-0.198739	0.842467	0.999317
Arpc5	139.711	0.123996	0.158165	0.783967	0.43306	0.999317
Arpc5l	583.623	0.0481854	0.111088	0.433757	0.664465	0.999317
Arpp19	281.613	-0.159067	0.119676	-1.32914	0.183802	0.999317
Arpp21	872.574	-0.105866	0.12931	-0.818698	0.412959	0.999317
Arrb1	598.887	-0.0999858	0.145701	-0.68624	0.492562	0.999317
Arrb2	215.874	-0.0739183	0.137282	-0.538441	0.590273	0.999317
Arrdc3	116.841	-0.00801453	0.179226	-0.0447175	0.964332	0.999317
Arsa	41.7389	0.0776817	0.252674	0.307438	0.75851	0.999317
Arsb	57.5787	-0.0467326	0.255966	-0.182574	0.855133	0.999317
Arsg	58.5142	0.337809	0.244111	1.38383	0.166409	0.999317
Arsk	38.2316	-0.264802	0.235301	-1.12537	0.26043	0.999317
Arvcf	44.9864	-0.0774217	0.280988	-0.275534	0.782906	0.999317
Arxes1	83.9447	-0.0728828	0.16739	-0.435407	0.663267	0.999317
Arxes2	229.083	-0.0503521	0.121114	-0.415741	0.6776	0.999317
Asah1	50.0948	0.00964873	0.270422	0.0356803	0.971537	0.999317
Asah2	63.4605	0.0616114	0.254942	0.241668	0.809037	0.999317
Asap1	433.201	0.00555676	0.113851	0.0488075	0.961073	0.999317
Asap2	98.1662	0.234328	0.190861	1.22774	0.219543	0.999317
Asb1	122.355	0.0828874	0.160105	0.517705	0.604664	0.999317
Asb13	95.0391	-0.228304	0.191805	-1.19029	0.233932	0.999317
Asb6	34.1673	-0.00930298	0.25485	-0.0365038	0.970881	0.999317
Asb7	78.8136	0.259109	0.171021	1.51507	0.129754	0.999317
Asb8	169.053	0.101789	0.138821	0.733241	0.463412	0.999317
Ascc2	48.2683	0.0689259	0.213392	0.323001	0.746694	0.999317
Ascc3	131.001	-0.105861	0.177814	-0.595347	0.551611	0.999317
Asf1a	136.079	-0.0609977	0.169845	-0.359137	0.719493	0.999317
Asgr1	66.3312	-0.181765	0.22008	-0.825905	0.408858	0.999317
Ash1l	1925.13	-0.100408	0.0852907	-1.17724	0.2391	0.999317
Ash2l	118.658	0.0545411	0.171016	0.318924	0.749784	0.999317
Asic1	147.686	-0.0242773	0.169426	-0.143291	0.88606	0.999317
Asic2	84.182	0.269546	0.17513	1.53912	0.123775	0.999317
Asna1	101.082	-0.000231466	0.157977	-0.00146519	0.998831	0.999317
Asns	142.007	0.143651	0.177702	0.808382	0.418871	0.999317
Asnsd1	35.39	0.487611	0.286126	1.70418	0.0883474	0.999317
Aspa	90.8671	-0.251013	0.199638	-1.25734	0.20863	0.999317
Asph	1154.45	0.019994	0.102904	0.194297	0.845943	0.999317
Asphd1	60.9046	0.331631	0.191905	1.7281	0.0839699	0.999317
Asphd2	151.601	-0.0200445	0.137094	-0.146209	0.883756	0.999317
Asrgl1	347.171	-0.19251	0.131881	-1.45972	0.144366	0.999317
Aste1	37.4696	0.0182137	0.334816	0.0543992	0.956617	0.999317
Astn1	153.082	0.0957809	0.184339	0.519592	0.603348	0.999317
Astn2	93.9677	0.0170112	0.184325	0.0922891	0.926468	0.999317
Asun	61.2183	0.0671634	0.20281	0.331163	0.740521	0.999317
Asxl1	106.667	-0.00488921	0.141849	-0.0344676	0.972504	0.999317
Asxl2	247.276	0.112278	0.121597	0.923361	0.355819	0.999317
Asxl3	36.2085	0.141785	0.236022	0.600729	0.54802	0.999317
Atad1	209.459	-0.329455	0.183	-1.8003	0.071813	0.999317
Atad2	53.795	-0.319348	0.176431	-1.81004	0.0702897	0.999317
Atad2b	284.482	-0.160596	0.122547	-1.31049	0.190032	0.999317
Atad3a	96.2093	0.11862	0.248631	0.477095	0.633295	0.999317
Atad5	60.8738	-0.209558	0.189637	-1.10505	0.269139	0.999317
Atat1	65.5326	-0.205646	0.178607	-1.15139	0.249573	0.999317
Atcay	168.375	-0.23654	0.141987	-1.66592	0.0957288	0.999317
Ate1	518.186	-0.061593	0.108533	-0.567505	0.570371	0.999317
Atf1	104.837	0.0190545	0.171973	0.110799	0.911776	0.999317
Atf2	265.376	0.174024	0.128808	1.35103	0.176686	0.999317
Atf4	706.306	0.0323485	0.187839	0.172214	0.863269	0.999317
Atf5	85.4544	-0.0553798	0.29081	-0.190433	0.84897	0.999317
Atf6	163.418	-0.0119871	0.141748	-0.0845658	0.932607	0.999317
Atf6b	196.167	0.0950498	0.163026	0.583035	0.559869	0.999317
Atf7	146.168	-0.144561	0.150477	-0.960682	0.336712	0.999317
Atf7ip	387.846	-0.0168165	0.126089	-0.13337	0.893901	0.999317
Atg10	57.899	0.0608435	0.222391	0.273588	0.784401	0.999317
Atg12	266.943	-0.0207045	0.13829	-0.149718	0.880987	0.999317
Atg13	139.594	-0.0671043	0.177196	-0.3787	0.704911	0.999317
Atg14	89.9375	0.107131	0.159053	0.673556	0.500594	0.999317
Atg16l1	166.246	0.222389	0.133982	1.65985	0.0969452	0.999317
Atg16l2	94.1159	-0.0637697	0.199809	-0.319153	0.749611	0.999317
Atg2a	119.194	0.110001	0.154623	0.711414	0.476828	0.999317
Atg2b	246.651	0.0277994	0.16404	0.169467	0.865429	0.999317
Atg3	180.815	0.046958	0.186272	0.252094	0.800968	0.999317
Atg4b	243.205	-0.00584238	0.139016	-0.0420266	0.966477	0.999317
Atg4c	59.1175	0.440825	0.278852	1.58086	0.11391	0.999317
Atg4d	60.8064	-0.335645	0.175776	-1.9095	0.0561974	0.999317
Atg5	119.522	-0.0652163	0.142756	-0.456836	0.647789	0.999317
Atg7	84.635	0.102215	0.186362	0.548473	0.583367	0.999317
Atic	93.9024	0.200128	0.16421	1.21874	0.222945	0.999317
Atl1	168.682	-0.14766	0.158478	-0.93174	0.351471	0.999317
Atl3	57.9967	-0.125289	0.214623	-0.583762	0.55938	0.999317
Atmin	193.907	-0.330311	0.196556	-1.6805	0.092861	0.999317
Atn1	59.3089	0.44607	0.225917	1.97449	0.0483264	0.999317
Atox1	91.5937	-0.0770021	0.207338	-0.371384	0.710351	0.999317
Atp11a	153.351	-0.152155	0.146858	-1.03607	0.30017	0.999317
Atp11b	279.729	-0.068591	0.176359	-0.388928	0.697329	0.999317
Atp11c	149.015	0.208741	0.144258	1.44699	0.147899	0.999317
Atp13a1	82.6691	-0.19038	0.186277	-1.02203	0.306769	0.999317
Atp13a2	273.617	0.0757844	0.11359	0.667172	0.504662	0.999317
Atp13a3	120.534	-0.0988378	0.151158	-0.653869	0.513196	0.999317
Atp13a4	31.4805	-0.0912877	0.27358	-0.333679	0.738622	0.999317
Atp1a1	4065.36	0.200725	0.2243	0.894896	0.370843	0.999317
Atp1a2	4558.58	0.0725089	0.253165	0.286409	0.774565	0.999317
Atp1a3	1511.28	-0.0255203	0.0915901	-0.278636	0.780524	0.999317
Atp1b1	9961.32	-0.0306358	0.0788291	-0.388636	0.697546	0.999317
Atp1b2	1668.59	0.113397	0.0893462	1.26919	0.204375	0.999317
Atp1b3	341.416	-0.0597219	0.16078	-0.371452	0.710301	0.999317
Atp2a2	1891.13	0.036226	0.0740786	0.489021	0.624826	0.999317
Atp2a3	162.913	0.0358148	0.191714	0.186814	0.851806	0.999317
Atp2b1	1990.98	-0.0302919	0.0724906	-0.417873	0.67604	0.999317
Atp2b2	2098.81	-0.0535355	0.0943809	-0.567228	0.570559	0.999317
Atp2b3	801.788	0.0796889	0.170135	0.468385	0.639509	0.999317
Atp2b4	219.985	-0.251729	0.153176	-1.64339	0.100302	0.999317
Atp5a1	2294.7	0.156988	0.132363	1.18605	0.235603	0.999317
Atp5b	2423.43	0.112729	0.0881657	1.2786	0.201037	0.999317
Atp5c1	485.657	-0.00180849	0.11801	-0.0153249	0.987773	0.999317
Atp5d	662.589	-0.019229	0.121701	-0.158003	0.874455	0.999317
Atp5e	509.832	0.0677846	0.111832	0.60613	0.544428	0.999317
Atp5f1	639.223	0.181074	0.106321	1.70308	0.088553	0.999317
Atp5g1	78.206	-0.339126	0.276225	-1.22772	0.219553	0.999317
Atp5g3	3135.74	0.196117	0.128371	1.52773	0.126579	0.999317
Atp5h	459.947	0.0897414	0.151797	0.591192	0.554392	0.999317
Atp5j2	785.884	-0.0605299	0.105294	-0.574865	0.565383	0.999317
Atp5k	1318.05	-0.149774	0.126166	-1.18712	0.235182	0.999317
Atp5s	47.7274	0.377965	0.302032	1.2514	0.210787	0.999317
Atp5sl	165.035	-0.0846965	0.131605	-0.643568	0.519856	0.999317
Atp6ap1	1182.7	-0.136547	0.172229	-0.792824	0.427881	0.999317
Atp6ap2	1171.78	-0.0224329	0.150146	-0.149408	0.881232	0.999317
Atp6v0a1	1028.47	-0.107527	0.112864	-0.952717	0.340734	0.999317
Atp6v0a2	99.5223	0.180893	0.183542	0.985566	0.324346	0.999317
Atp6v0b	543.832	-0.173207	0.132542	-1.30681	0.191278	0.999317
Atp6v0d1	223.804	-0.0119476	0.131483	-0.0908682	0.927597	0.999317
Atp6v0e	213.918	0.145726	0.138841	1.04959	0.293908	0.999317
Atp6v0e2	775.436	-0.167769	0.132925	-1.26214	0.206898	0.999317
Atp6v1a	2566.74	0.078548	0.127545	0.615848	0.537995	0.999317
Atp6v1b2	2510.3	0.138052	0.118083	1.16911	0.24236	0.999317
Atp6v1c1	507.558	0.108181	0.091078	1.18779	0.234917	0.999317
Atp6v1d	1208.15	-0.0855891	0.0719441	-1.18966	0.23418	0.999317
Atp6v1e1	1340.35	0.0166955	0.0792004	0.210801	0.833042	0.999317
Atp6v1f	1324.42	-0.0440561	0.120614	-0.365265	0.714914	0.999317
Atp6v1g2	988.273	-0.0367497	0.126546	-0.290405	0.771507	0.999317
Atp6v1h	300.335	0.103585	0.114865	0.901798	0.367164	0.999317
Atp7a	68.8375	-0.0197648	0.221588	-0.0891963	0.928926	0.999317
Atp8a1	483.535	0.0612685	0.106465	0.575483	0.564965	0.999317
Atp8a2	65.0559	0.0474925	0.212671	0.223315	0.823291	0.999317
Atp8b2	53.5699	-0.0357185	0.22146	-0.161286	0.871868	0.999317
Atp9a	1651.09	-0.220879	0.156265	-1.41349	0.157513	0.999317
Atp9b	97.2741	0.150901	0.177603	0.84965	0.395519	0.999317
Atpaf1	110.567	0.0872925	0.152594	0.572056	0.567284	0.999317
Atpif1	958.266	0.0932423	0.104157	0.895209	0.370675	0.999317
Atr	113.565	0.193824	0.146235	1.32543	0.185029	0.999317
Atraid	262.357	0.0375863	0.122348	0.307208	0.758685	0.999317
Atrip	63.4952	-0.0491964	0.22427	-0.219362	0.826368	0.999317
Atrn	273.224	0.0441322	0.185003	0.238549	0.811456	0.999317
Atrx	2132.61	-0.164911	0.0979987	-1.68279	0.0924163	0.999317
Atxn1	269.515	0.00755043	0.149173	0.0506153	0.959632	0.999317
Atxn10	695.371	-0.0688658	0.109049	-0.631511	0.527706	0.999317
Atxn1l	39.4284	0.421026	0.243853	1.72656	0.0842469	0.999317
Atxn2	611.376	0.121287	0.1094	1.10866	0.267579	0.999317
Atxn2l	57.9115	0.0480719	0.215486	0.223086	0.823469	0.999317
Atxn3	80.9247	-0.265446	0.183602	-1.44577	0.148241	0.999317
Atxn7	193.011	-0.00788417	0.144088	-0.0547176	0.956363	0.999317
Atxn7l1	104.645	0.0568161	0.191203	0.297151	0.766351	0.999317
Atxn7l3	304.641	-0.103836	0.118221	-0.878325	0.379767	0.999317
Auh	284.371	0.0525816	0.147607	0.356227	0.72167	0.999317
Aup1	219.384	-0.185792	0.177846	-1.04468	0.296172	0.999317
Aurkaip1	255.266	0.18484	0.130512	1.41627	0.156698	0.999317
Auts2	673.828	-0.0542029	0.125373	-0.432334	0.665499	0.999317
Aven	40.9509	-0.386172	0.259446	-1.48845	0.136633	0.999317
Avl9	254.962	0.0394685	0.138366	0.285246	0.775456	0.999317
Avpi1	46.4545	0.0275064	0.246938	0.11139	0.911307	0.999317
Axin1	74.5389	-0.205978	0.171791	-1.199	0.230527	0.999317
Axin2	34.7504	-0.141167	0.283767	-0.497476	0.618853	0.999317
Axl	77.1452	-0.0501569	0.184519	-0.271825	0.785757	0.999317
Azi2	205.572	-0.134505	0.11432	-1.17657	0.239367	0.999317
Azin1	250.808	0.0606672	0.151354	0.40083	0.688545	0.999317
Azin2	50.2346	-0.229405	0.226351	-1.01349	0.310825	0.999317
B020018G12Rik	50.7274	0.105581	0.273434	0.38613	0.699401	0.999317
B230118H07Rik	233.426	0.0552881	0.165563	0.333941	0.738424	0.999317
B230217C12Rik	263.179	0.0203877	0.098159	0.207701	0.835462	0.999317
B230219D22Rik	810.718	-0.180655	0.0926613	-1.94962	0.0512209	0.999317
B230312C02Rik	36.0051	-0.146145	0.242886	-0.6017	0.547374	0.999317
B230325K18Rik	40.7755	-0.442303	0.280011	-1.57959	0.114201	0.999317
B230354K17Rik	123.615	-0.282394	0.156219	-1.80768	0.0706564	0.999317
B2m	566.792	0.186471	0.153384	1.21571	0.224095	0.999317
B3galnt1	48.4476	-0.356034	0.262543	-1.3561	0.175068	0.999317
B3galnt2	34.8258	0.521998	0.380268	1.37271	0.169842	0.999317
B3galt1	82.104	0.0174706	0.213598	0.081792	0.934812	0.999317
B3gat1	238.197	0.151299	0.121248	1.24784	0.212088	0.999317
B3gat2	76.4699	-0.349387	0.175417	-1.99175	0.0463988	0.999317
B3gat3	165.525	-0.102402	0.132142	-0.774937	0.438377	0.999317
B3glct	131.046	0.216435	0.153484	1.41015	0.158495	0.999317
B3gnt1	224.821	-0.164939	0.13159	-1.25343	0.210048	0.999317
B4galnt1	100.666	-0.300211	0.20274	-1.48077	0.138668	0.999317
B4galt2	57.1968	-0.0775934	0.244903	-0.316833	0.75137	0.999317
B4galt3	90.6896	0.0348307	0.193689	0.179828	0.857288	0.999317
B4galt4	44.2165	0.325884	0.301611	1.08048	0.279928	0.999317
B4galt5	101.188	0.0983596	0.187082	0.525757	0.599057	0.999317
B4galt6	278.91	0.192571	0.112186	1.71653	0.0860644	0.999317
B4galt7	37.4074	-0.337588	0.251663	-1.34143	0.179781	0.999317
B630005N14Rik	168.953	0.0163509	0.161091	0.101501	0.919153	0.999317
B630019K06Rik	122.242	0.0394997	0.168944	0.233803	0.815138	0.999317
B830012L14Rik	65.1026	-0.165353	0.188373	-0.877795	0.380055	0.999317
B930041F14Rik	280.233	0.0144337	0.155519	0.0928097	0.926055	0.999317
B930095G15Rik	374.251	-0.171019	0.130726	-1.30822	0.190798	0.999317
B9d2	42.7483	0.0112088	0.238271	0.0470423	0.962479	0.999317
BC002059	82.3261	-0.122327	0.175291	-0.697851	0.48527	0.999317
BC002163	152.645	0.37171	0.221437	1.67863	0.093225	0.999317
BC003331	264.089	0.0999839	0.10832	0.923038	0.355987	0.999317
BC003965	136.826	0.0348792	0.142904	0.244075	0.807173	0.999317
BC004004	177.751	0.0508956	0.118282	0.430291	0.666984	0.999317
BC005537	397.003	0.134532	0.111277	1.20898	0.226671	0.999317
BC005561	539.431	-0.0063692	0.0972564	-0.0654887	0.947785	0.999317
BC005624	195.057	-0.0712175	0.145389	-0.48984	0.624247	0.999317
BC007180	106.325	-0.306254	0.173736	-1.76276	0.0779407	0.999317
BC017158	47.4594	0.0743206	0.25924	0.286686	0.774353	0.999317
BC017643	74.8128	0.0417834	0.187426	0.222932	0.823588	0.999317
BC023829	64.2822	0.125743	0.179352	0.701093	0.483245	0.999317
BC026585	32.7617	0.0807362	0.275633	0.292912	0.769589	0.999317
BC029214	88.2873	0.179947	0.193008	0.932328	0.351167	0.999317
BC029722	106.242	-0.258582	0.16707	-1.54775	0.121682	0.999317
BC030336	258.391	-0.183473	0.144382	-1.27074	0.203821	0.999317
BC031181	453.877	0.00516147	0.114739	0.0449843	0.96412	0.999317
BC037034	223.603	0.0699155	0.124416	0.56195	0.57415	0.999317
BC048546	39.1308	0.155869	0.249173	0.625546	0.531613	0.999317
BC051142	40.9348	-0.0671458	0.234455	-0.286391	0.774579	0.999317
BC052040	45.8194	-0.301832	0.252893	-1.19352	0.232667	0.999317
BC065397	33.7807	-0.261164	0.298982	-0.873512	0.382384	0.999317
BC068281	36.3527	0.115899	0.23966	0.483599	0.62867	0.999317
Babam1	191.979	0.0455745	0.166687	0.273414	0.784535	0.999317
Bace1	377.071	0.00178558	0.0941367	0.018968	0.984867	0.999317
Bach1	65.8051	0.31101	0.234437	1.32662	0.184633	0.999317
Bach2	132.243	0.247441	0.169189	1.46252	0.1436	0.999317
Bad	207.62	-0.074363	0.160268	-0.463991	0.642654	0.999317
Bag1	183.564	0.0442212	0.15988	0.276591	0.782095	0.999317
Bag3	130.377	0.0487215	0.175639	0.277395	0.781477	0.999317
Bag4	187.775	0.180377	0.142602	1.2649	0.205908	0.999317
Bag5	153.887	-0.192641	0.132748	-1.45117	0.146731	0.999317
Bag6	263.127	0.0606971	0.12197	0.497639	0.618738	0.999317
Bahcc1	33.3158	0.0743031	0.288113	0.257895	0.796488	0.999317
Bahd1	47.5482	0.0137882	0.323731	0.0425917	0.966027	0.999317
Bai1	226.5	0.0650327	0.15891	0.409242	0.682362	0.999317
Bai2	52.9497	-0.0201519	0.242213	-0.0831992	0.933693	0.999317
Bai3	757.229	-0.185315	0.0924253	-2.00502	0.0449606	0.999317
Baiap2	332.154	0.1384	0.137545	1.00622	0.314311	0.999317
Baiap3	69.3044	0.15177	0.248394	0.611005	0.541196	0.999317
Banf1	188.649	0.200055	0.124019	1.6131	0.106723	0.999317
Banp	292.409	-0.089242	0.143508	-0.621863	0.534032	0.999317
Bap1	109.405	0.168795	0.155694	1.08414	0.278302	0.999317
Barhl1	44.2454	0.084728	0.23893	0.354615	0.722878	0.999317
Barhl2	57.0163	0.274757	0.312015	0.88059	0.37854	0.999317
Basp1	1063.55	-0.027842	0.165699	-0.168027	0.866562	0.999317
Baz1b	965.062	-0.167089	0.104261	-1.60261	0.109022	0.999317
Baz2a	401.895	-0.176751	0.129005	-1.37011	0.170653	0.999317
Baz2b	1248.3	-0.0829259	0.104356	-0.794641	0.426822	0.999317
Bbc3	37.8739	0.0956575	0.292697	0.326814	0.743809	0.999317
Bbip1	191.747	-0.134133	0.135767	-0.987965	0.32317	0.999317
Bbs2	41.4437	-0.0324198	0.247242	-0.131126	0.895676	0.999317
Bbs4	180.105	-0.075857	0.158563	-0.478404	0.632362	0.999317
Bbs9	49.4414	0.138652	0.221274	0.626609	0.530916	0.999317
Bbx	254.905	-0.128192	0.116107	-1.10408	0.269557	0.999317
Bcan	630.426	0.0552367	0.106891	0.516756	0.605327	0.999317
Bcap29	100.197	0.191646	0.208678	0.918382	0.358419	0.999317
Bcap31	246.054	0.0128229	0.129094	0.0993299	0.920876	0.999317
Bcar1	196.366	0.0852571	0.194808	0.437646	0.661643	0.999317
Bcas1	886.887	-0.144357	0.138271	-1.04402	0.296477	0.999317
Bcas2	163.716	0.247382	0.156108	1.58468	0.113039	0.999317
Bcas3	137.373	-0.313869	0.15905	-1.9734	0.0484494	0.999317
Bcat1	211.346	-0.101975	0.159172	-0.640657	0.521746	0.999317
Bccip	59.6202	0.309516	0.247622	1.24996	0.211316	0.999317
Bckdha	48.709	-0.17993	0.226659	-0.793837	0.427291	0.999317
Bckdk	58.3765	0.113525	0.226099	0.502103	0.615595	0.999317
Bcl10	52.007	-0.118982	0.283741	-0.419334	0.674972	0.999317
Bcl11a	169.14	-0.081583	0.142229	-0.573604	0.566236	0.999317
Bcl11b	73.6938	0.339335	0.219244	1.54775	0.121682	0.999317
Bcl2	152.209	-0.160183	0.136119	-1.17678	0.239281	0.999317
Bcl2l1	213.17	-0.0444631	0.153961	-0.288795	0.772738	0.999317
Bcl2l13	136.818	-0.0176664	0.140867	-0.125411	0.900198	0.999317
Bcl2l15	56.9681	-0.0717368	0.284596	-0.252066	0.80099	0.999317
Bcl2l2	74.6937	0.0958971	0.174464	0.549668	0.582547	0.999317
Bcl6	207.218	0.00331921	0.139071	0.023867	0.980959	0.999317
Bcl7a	354.869	-0.16971	0.140668	-1.20646	0.22764	0.999317
Bcl7b	153.589	-0.0111823	0.168822	-0.0662375	0.947189	0.999317
Bcl9	116.136	0.0286458	0.152813	0.187457	0.851302	0.999317
Bcl9l	383.384	-0.0577785	0.144177	-0.400748	0.688606	0.999317
Bclaf1	1387.51	-0.0667758	0.0903325	-0.739222	0.459772	0.999317
Bcorl1	175.252	-0.219976	0.134432	-1.63633	0.10177	0.999317
Bcr	210.188	-0.0195995	0.13614	-0.143966	0.885528	0.999317
Bcs1l	65.4172	-0.0271242	0.209059	-0.129744	0.896769	0.999317
Bdh1	246.728	0.0302368	0.123495	0.244841	0.806579	0.999317
Bdnf	105.455	0.076289	0.185763	0.410679	0.681308	0.999317
Bdp1	317.045	-0.146352	0.132608	-1.10364	0.269749	0.999317
Bean1	64.3658	-0.0657135	0.190605	-0.344763	0.730273	0.999317
Becn1	278.387	0.153611	0.0999704	1.53656	0.1244	0.999317
Begain	63.0222	-0.35288	0.21785	-1.61983	0.10527	0.999317
Bend5	38.5066	0.194588	0.259125	0.750942	0.452687	0.999317
Bend6	1651.52	-0.0624357	0.0708188	-0.881626	0.377979	0.999317
Bend7	57.815	-0.00158049	0.248988	-0.00634766	0.994935	0.999317
Bet1l	280.616	-0.0968208	0.172247	-0.562105	0.574044	0.999317
Bex1	249.757	0.00194127	0.175226	0.0110787	0.991161	0.999317
Bex2	725.825	0.0154311	0.0959616	0.160805	0.872247	0.999317
Bex4	91.044	-0.00744658	0.208452	-0.0357232	0.971503	0.999317
Bfar	204.08	-0.0834067	0.187266	-0.445391	0.656038	0.999317
Bgn	38.0073	-0.00256605	0.284698	-0.00901325	0.992809	0.999317
Bhlhb9	119.379	-0.0749591	0.138466	-0.541355	0.588263	0.999317
Bhlhe22	276.909	0.226502	0.141117	1.60507	0.108479	0.999317
Bhlhe40	119.211	0.333703	0.199852	1.66975	0.0949694	0.999317
Bhlhe41	241.812	0.0755141	0.161685	0.467046	0.640467	0.999317
Bicc1	68.5232	-0.122466	0.197582	-0.619824	0.535373	0.999317
Bicd1	492.193	-0.0297629	0.123896	-0.240226	0.810155	0.999317
Bicd2	171.68	-0.194371	0.165183	-1.1767	0.239315	0.999317
Bin1	502.959	0.0604182	0.1147	0.52675	0.598367	0.999317
Birc2	155.117	0.213298	0.137345	1.55301	0.12042	0.999317
Bivm	59.9999	0.379119	0.241327	1.57098	0.116188	0.999317
Blcap	323.323	-0.0155889	0.10815	-0.144142	0.885389	0.999317
Blm	31.7469	0.451994	0.308022	1.46741	0.142265	0.999317
Blmh	374.63	-0.179484	0.158115	-1.13515	0.256314	0.999317
Bloc1s4	65.2782	0.121924	0.201318	0.605631	0.54476	0.999317
Bloc1s5	58.105	-0.32347	0.195266	-1.65656	0.0976085	0.999317
Bloc1s6	62.6937	-0.021775	0.214675	-0.101432	0.919207	0.999317
Blvra	131.731	-0.0839597	0.175263	-0.47905	0.631903	0.999317
Blvrb	49.9097	0.114877	0.197266	0.582345	0.560335	0.999317
Blzf1	101.396	0.127909	0.167158	0.765198	0.444153	0.999317
Bmi1	124.85	0.200096	0.135049	1.48166	0.138432	0.999317
Bmp1	132.365	0.205004	0.178827	1.14638	0.251638	0.999317
Bmp2k	64.7059	0.0760577	0.213408	0.356396	0.721544	0.999317
Bmpr1a	153.46	0.0247998	0.147405	0.168242	0.866393	0.999317
Bmpr1b	40.2677	0.0437953	0.24188	0.181062	0.856319	0.999317
Bmpr2	547.012	-0.154269	0.0923901	-1.66976	0.0949668	0.999317
Bms1	231.665	0.0637374	0.105556	0.603825	0.54596	0.999317
Bmyc	132.078	-0.0762869	0.166768	-0.457444	0.647352	0.999317
Bnip1	46.7575	0.330558	0.213964	1.54492	0.122366	0.999317
Bnip2	323.306	-0.0193122	0.125876	-0.153422	0.878066	0.999317
Bnip3	260.069	0.21131	0.151461	1.39515	0.162972	0.999317
Bnip3l	192.962	-0.0195515	0.116799	-0.167395	0.867059	0.999317
Boc	146.232	-0.0342073	0.170639	-0.200465	0.841117	0.999317
Bod1	72.5159	0.14385	0.262044	0.548954	0.583037	0.999317
Bod1l	1226.57	-0.20338	0.107899	-1.8849	0.059443	0.999317
Bok	35.3344	-0.0104941	0.26625	-0.0394146	0.96856	0.999317
Bola1	50.7418	0.0494561	0.216684	0.22824	0.819459	0.999317
Bola2	149.759	-0.00690104	0.140901	-0.0489781	0.960937	0.999317
Bola3	185.199	-0.112653	0.148471	-0.758756	0.447999	0.999317
Bop1	50.5732	0.0439451	0.223751	0.196402	0.844296	0.999317
Bpgm	185.014	0.0641911	0.153674	0.417709	0.67616	0.999317
Bphl	64.3869	0.235902	0.184857	1.27613	0.20191	0.999317
Bpnt1	131.647	0.353792	0.192332	1.83948	0.065844	0.999317
Bptf	1535.61	-0.0176774	0.0877895	-0.201362	0.840416	0.999317
Braf	667.374	-0.113987	0.0961457	-1.18557	0.235793	0.999317
Brap	112.544	-0.0685582	0.171982	-0.398635	0.690162	0.999317
Brca2	54.1819	0.0167624	0.296938	0.0564509	0.954983	0.999317
Brcc3	126.14	-0.0454204	0.178071	-0.255069	0.79867	0.999317
Brd1	280.719	-0.216468	0.116487	-1.85829	0.0631272	0.999317
Brd2	896.411	0.27407	0.157604	1.73897	0.0820396	0.999317
Brd3	422.367	-0.0397751	0.0972893	-0.408833	0.682662	0.999317
Brd4	658.982	-0.140074	0.14891	-0.94066	0.346879	0.999317
Brd7	272.627	-0.0735114	0.123252	-0.59643	0.550888	0.999317
Brd8	451.08	0.0165224	0.114575	0.144205	0.885338	0.999317
Brd9	351.612	0.0621388	0.149657	0.415209	0.677989	0.999317
Brdt	56.5195	-0.0794206	0.200298	-0.396513	0.691727	0.999317
Bre	114.585	-0.139962	0.167331	-0.836437	0.402909	0.999317
Brf1	58.3443	-0.185256	0.218143	-0.849241	0.395747	0.999317
Bri3bp	375.617	-0.0886422	0.107994	-0.820805	0.411757	0.999317
Brinp1	428.886	-0.173631	0.126334	-1.37438	0.169324	0.999317
Brinp2	113.495	0.237001	0.196985	1.20315	0.22892	0.999317
Brip1os	53.8976	-0.0966364	0.301235	-0.320801	0.748361	0.999317
Brix1	72.7282	0.154047	0.2231	0.690486	0.489889	0.999317
Brk1	317.88	0.0661371	0.120237	0.550054	0.582282	0.999317
Brms1l	65.7785	0.00966784	0.253338	0.0381618	0.969559	0.999317
Brox	191.126	0.0499295	0.15632	0.319406	0.749419	0.999317
Brpf1	181.501	-0.1343	0.12483	-1.07586	0.281989	0.999317
Brpf3	58.0957	0.280993	0.238444	1.17845	0.238619	0.999317
Brsk1	387.761	-0.111761	0.135398	-0.825427	0.409129	0.999317
Brsk2	528.975	-0.127251	0.1039	-1.22474	0.220672	0.999317
Brwd3	126.695	-0.171286	0.171679	-0.997708	0.318421	0.999317
Bscl2	323.928	-0.0603714	0.11694	-0.516261	0.605672	0.999317
Bsdc1	69.8518	0.18939	0.228146	0.830127	0.406467	0.999317
Bsg	695.205	0.110808	0.120264	0.92137	0.356857	0.999317
Bsn	317.333	0.0106281	0.117435	0.0905022	0.927888	0.999317
Btaf1	134.81	-0.366938	0.195012	-1.88162	0.0598876	0.999317
Btbd1	75.7273	0.0991018	0.232118	0.426946	0.669418	0.999317
Btbd10	182.684	0.290114	0.142926	2.02982	0.0423744	0.999317
Btbd11	152.728	-0.163496	0.164781	-0.992198	0.321101	0.999317
Btbd17	181.194	-0.0270922	0.212527	-0.127476	0.898563	0.999317
Btbd2	66.6038	0.143731	0.198963	0.722401	0.470048	0.999317
Btbd3	1001.01	-0.0857261	0.136106	-0.629847	0.528795	0.999317
Btbd6	83.4598	-0.108949	0.180765	-0.602712	0.5467	0.999317
Btbd7	48.1538	0.165383	0.239077	0.691754	0.489092	0.999317
Btbd9	302.204	-0.129916	0.100974	-1.28663	0.198222	0.999317
Btf3l4	49.5645	0.371049	0.242447	1.53043	0.12591	0.999317
Btg1	384.013	-0.190652	0.149124	-1.27849	0.201078	0.999317
Btg2	36.4238	-0.610846	0.304622	-2.00526	0.044935	0.999317
Btrc	223.233	-0.00548752	0.126218	-0.0434764	0.965322	0.999317
Bub3	286.052	0.0437414	0.116694	0.374837	0.707781	0.999317
Bud13	75.0654	-0.320024	0.185795	-1.72246	0.0849861	0.999317
Bud31	108.71	0.0567959	0.185323	0.30647	0.759247	0.999317
Bysl	54.0421	-0.060358	0.189886	-0.317865	0.750588	0.999317
Bzrap1	494.296	0.158417	0.115442	1.37227	0.16998	0.999317
Bzw1	302.201	-0.000139648	0.112796	-0.00123806	0.999012	0.999317
Bzw2	178.303	0.103173	0.125297	0.823431	0.410263	0.999317
C030017K20Rik	46.1477	-0.154092	0.282171	-0.546092	0.585002	0.999317
C030037D09Rik	55.5502	-0.178133	0.252483	-0.705525	0.480483	0.999317
C130071C03Rik	178.729	-0.0236834	0.196378	-0.120601	0.904007	0.999317
C1d	171.763	0.0784424	0.151181	0.518865	0.603855	0.999317
C1galt1c1	32.1838	0.43341	0.262357	1.65199	0.0985372	0.999317
C1qa	80.7878	-0.0357927	0.283979	-0.12604	0.8997	0.999317
C1qb	66.2404	0.202134	0.288844	0.699802	0.484051	0.999317
C1qbp	303.793	0.0456062	0.143371	0.318099	0.75041	0.999317
C1ql1	32.3257	-0.665482	0.375593	-1.77182	0.0764251	0.999317
C1ql3	55.6457	-0.490479	0.248305	-1.97531	0.0482333	0.999317
C1qtnf4	113.535	-0.10537	0.338537	-0.311252	0.755609	0.999317
C230004F18Rik	70.8517	-0.391216	0.208761	-1.87399	0.0609318	0.999317
C2cd2l	171.525	-0.119484	0.136251	-0.876943	0.380518	0.999317
C2cd3	78.888	-0.106647	0.169264	-0.630068	0.52865	0.999317
C2cd5	106.294	-0.0556231	0.236885	-0.234811	0.814356	0.999317
C330006A16Rik	212.67	-0.0190476	0.169187	-0.112583	0.910361	0.999317
C530008M17Rik	96.3169	-0.223405	0.209027	-1.06878	0.285167	0.999317
C77370	178.897	-0.0369172	0.138021	-0.267475	0.789104	0.999317
C78339	301.477	0.0540144	0.136026	0.39709	0.691301	0.999317
C87436	40.251	-0.0746528	0.228906	-0.326128	0.744327	0.999317
Caap1	50.6563	0.0255971	0.189429	0.135127	0.892511	0.999317
Cab39	358.438	0.164762	0.130541	1.26215	0.206895	0.999317
Cab39l	128.23	-0.225194	0.148422	-1.51725	0.129203	0.999317
Cabin1	176.417	0.15289	0.145641	1.04977	0.293823	0.999317
Cables1	77.9906	-0.357964	0.181896	-1.96796	0.0490727	0.999317
Cables2	77.7122	0.0729065	0.209581	0.347868	0.72794	0.999317
Cabp1	276.573	0.0626456	0.121583	0.515248	0.60638	0.999317
Cabp7	94.4826	0.219689	0.366322	0.599715	0.548696	0.999317
Cacfd1	133.54	-0.127287	0.15923	-0.799389	0.424065	0.999317
Cachd1	122.291	-0.152692	0.19686	-0.775633	0.437966	0.999317
Cacna1a	2446.55	0.0111442	0.137891	0.0808189	0.935586	0.999317
Cacna1b	200.777	-0.0117062	0.124558	-0.0939818	0.925124	0.999317
Cacna1c	100.653	0.0969225	0.172989	0.560283	0.575287	0.999317
Cacna1d	269.014	0.0813092	0.140942	0.5769	0.564007	0.999317
Cacna1e	371.497	-0.153384	0.148591	-1.03226	0.301949	0.999317
Cacna1g	245.667	0.229516	0.123865	1.85296	0.0638886	0.999317
Cacna1i	52.053	-0.188159	0.23733	-0.792815	0.427885	0.999317
Cacna2d1	457.25	-0.188323	0.115608	-1.62897	0.103318	0.999317
Cacna2d2	849.772	-0.111584	0.127192	-0.877289	0.38033	0.999317
Cacna2d3	115.596	0.199443	0.17354	1.14926	0.250447	0.999317
Cacnb1	121.599	-0.120723	0.192515	-0.627081	0.530606	0.999317
Cacnb2	149.246	0.079673	0.196137	0.406211	0.684588	0.999317
Cacnb3	42.1208	0.264815	0.206225	1.28411	0.199104	0.999317
Cacnb4	1983.71	0.154696	0.109328	1.41498	0.157074	0.999317
Cacng2	1407.83	0.0993709	0.234198	0.424304	0.671344	0.999317
Cacng3	45.2613	0.251605	0.226231	1.11216	0.266069	0.999317
Cacng4	114.088	-0.025613	0.184072	-0.139147	0.889334	0.999317
Cacng5	135.969	0.228891	0.197877	1.15673	0.247382	0.999317
Cacng7	454.912	-0.169064	0.139206	-1.21449	0.224561	0.999317
Cactin	76.5013	0.0407833	0.229642	0.177595	0.859041	0.999317
Cacul1	129.106	0.0146421	0.194098	0.0754368	0.939867	0.999317
Cacybp	278.298	-0.112404	0.1275	-0.8816	0.377993	0.999317
Cad	41.7865	-0.144499	0.277995	-0.519791	0.603209	0.999317
Cadm1	662.521	0.0125902	0.0893526	0.140905	0.887945	0.999317
Cadm2	1341.74	-0.0122756	0.100318	-0.122367	0.902608	0.999317
Cadm3	1016.73	-0.163948	0.117093	-1.40014	0.16147	0.999317
Cadm4	172.486	-0.0270337	0.148831	-0.181641	0.855865	0.999317
Cadps	373.258	-0.158137	0.13216	-1.19655	0.231481	0.999317
Cadps2	384.305	-0.216638	0.138892	-1.55976	0.118817	0.999317
Calb2	999.028	0.158234	0.172541	0.917081	0.3591	0.999317
Calcoco1	99.5778	-0.148155	0.254367	-0.582447	0.560266	0.999317
Cald1	324.868	-0.0644327	0.148821	-0.432954	0.665048	0.999317
Calm1	16198.4	-0.0196418	0.0653919	-0.300371	0.763894	0.999317
Calm2	4866.98	0.124941	0.108915	1.14714	0.251322	0.999317
Calm3	3576.01	0.151382	0.11093	1.36466	0.172361	0.999317
Caln1	655.517	0.12673	0.152408	0.831521	0.405679	0.999317
Calr	526.796	-0.081168	0.156277	-0.519385	0.603492	0.999317
Calu	218.899	0.255229	0.193852	1.31661	0.187968	0.999317
Caly	143.63	-0.0949373	0.181013	-0.524478	0.599946	0.999317
Camk1	255.799	-0.302171	0.158523	-1.90617	0.0566284	0.999317
Camk1d	363.89	-0.0799933	0.144554	-0.553381	0.580002	0.999317
Camk1g	64.7221	-0.0772391	0.174128	-0.443578	0.657348	0.999317
Camk2a	561.651	-0.217461	0.128984	-1.68595	0.0918049	0.999317
Camk2b	1487	0.0668303	0.107726	0.62037	0.535014	0.999317
Camk2d	605.591	0.156433	0.102913	1.52006	0.128496	0.999317
Camk2g	387.527	0.0485674	0.151577	0.320415	0.748654	0.999317
Camk2n1	4779.62	-0.0212187	0.0955727	-0.222016	0.824301	0.999317
Camk2n2	432.103	0.058209	0.10436	0.557771	0.577001	0.999317
Camk4	1406.58	0.0627849	0.156786	0.40045	0.688825	0.999317
Camkk1	214.684	0.109791	0.162338	0.676311	0.498843	0.999317
Camkk2	1029.47	-0.0414171	0.124694	-0.33215	0.739776	0.999317
Camkv	53.5538	0.0420416	0.252584	0.166446	0.867806	0.999317
Caml	78.948	0.217411	0.193837	1.12162	0.262024	0.999317
Camsap1	303.858	-0.0875365	0.126893	-0.689843	0.490293	0.999317
Camsap2	536.3	-0.124431	0.0849336	-1.46504	0.142911	0.999317
Camsap3	70.2879	-0.2959	0.209396	-1.41311	0.157622	0.999317
Camta1	2037.88	0.000543562	0.131993	0.00411811	0.996714	0.999317
Camta2	341.725	0.0738059	0.151382	0.487549	0.625869	0.999317
Cand1	280.139	-0.0296763	0.120213	-0.246864	0.805014	0.999317
Cant1	102.078	-0.0335538	0.182671	-0.183684	0.854261	0.999317
Canx	873.727	-0.00476541	0.114452	-0.0416369	0.966788	0.999317
Cap1	148.089	-0.172922	0.169489	-1.02025	0.307608	0.999317
Cap2	147.842	0.130188	0.141903	0.917444	0.35891	0.999317
Capn1	32.843	-0.00868589	0.333555	-0.0260404	0.979225	0.999317
Capn10	96.5334	0.29665	0.160043	1.85356	0.0638019	0.999317
Capn2	238.832	-0.0713707	0.144654	-0.49339	0.621737	0.999317
Capn7	174.884	0.0364192	0.148444	0.245339	0.806194	0.999317
Capns1	546.939	-0.0526231	0.116803	-0.45053	0.652328	0.999317
Caprin1	465.314	-0.0621737	0.0893491	-0.695851	0.486522	0.999317
Caprin2	42.896	-0.0219297	0.28331	-0.0774056	0.938301	0.999317
Capza2	370.096	0.178726	0.16044	1.11397	0.26529	0.999317
Capzb	640.845	0.238059	0.157628	1.51026	0.130976	0.999317
Car10	824.682	-0.0864721	0.137087	-0.630783	0.528183	0.999317
Car11	214.081	0.0300426	0.179662	0.167217	0.867199	0.999317
Car14	100.397	-0.0620801	0.179101	-0.346621	0.728876	0.999317
Car2	674.299	0.0197318	0.123836	0.159338	0.873402	0.999317
Car4	304.732	0.0762286	0.194056	0.392817	0.694454	0.999317
Car7	146.096	0.289992	0.209331	1.38533	0.165952	0.999317
Car8	1408.4	0.0387726	0.328708	0.117955	0.906104	0.999317
Carf	90.7314	-0.263442	0.185606	-1.41936	0.155794	0.999317
Carhsp1	83.6892	-0.169581	0.188801	-0.898198	0.36908	0.999317
Carkd	102.964	0.291164	0.181747	1.60203	0.10915	0.999317
Carm1	90.6333	0.0308714	0.193911	0.159204	0.873508	0.999317
Carns1	80.8424	-0.0390332	0.211804	-0.184289	0.853787	0.999317
Cars	57.5014	0.127326	0.20564	0.619168	0.535806	0.999317
Cars2	38.1335	-0.0726738	0.271825	-0.267355	0.789196	0.999317
Casc3	297.16	0.0869886	0.119818	0.726004	0.467836	0.999317
Casc4	319.059	-0.225856	0.126397	-1.78688	0.0739573	0.999317
Casd1	188.627	0.0705336	0.155542	0.453471	0.65021	0.999317
Cask	193.106	-0.0496327	0.145156	-0.341926	0.732406	0.999317
Caskin1	290.88	0.0500977	0.129415	0.38711	0.698675	0.999317
Casp8ap2	283.284	-0.153619	0.10826	-1.41898	0.155905	0.999317
Casq2	92.1736	-0.184195	0.188965	-0.974757	0.329681	0.999317
Cast	75.7837	-0.122938	0.217601	-0.564968	0.572096	0.999317
Casz1	52.9938	0.149982	0.222226	0.674909	0.499734	0.999317
Cat	108.126	0.252839	0.206034	1.22717	0.219759	0.999317
Cav2	36.8721	-0.00331714	0.258172	-0.0128486	0.989749	0.999317
Cbfa2t2	74.8573	0.170636	0.18912	0.902263	0.366917	0.999317
Cbfa2t3	276.443	0.0276128	0.197196	0.140027	0.888639	0.999317
Cbfb	68.4494	0.0846331	0.280638	0.301574	0.762977	0.999317
Cbl	129.47	-0.122206	0.161328	-0.757498	0.448751	0.999317
Cblb	65.0813	-0.240526	0.229952	-1.04598	0.295569	0.999317
Cbll1	174.336	-0.072759	0.135569	-0.536692	0.59148	0.999317
Cbln1	1531.17	0.157253	0.149598	1.05116	0.293183	0.999317
Cbln2	71.366	-0.198836	0.23543	-0.844565	0.398354	0.999317
Cbln3	2311.88	-0.0479019	0.145157	-0.330001	0.741399	0.999317
Cbr1	286.419	0.104617	0.202271	0.51721	0.605009	0.999317
Cbx1	940.456	-0.043114	0.121945	-0.353552	0.723674	0.999317
Cbx3	506.082	0.0440662	0.104942	0.419909	0.674552	0.999317
Cbx4	147.84	0.0460299	0.137556	0.334625	0.737908	0.999317
Cbx6	1675.78	-0.0226688	0.118899	-0.190656	0.848795	0.999317
Cbx7	239.974	0.294655	0.194226	1.51707	0.129248	0.999317
Cbx8	49.5974	0.084091	0.280806	0.299463	0.764587	0.999317
Cby1	92.2462	-0.0904433	0.183452	-0.493009	0.622006	0.999317
Cc2d1a	35.5636	-0.144377	0.281725	-0.512474	0.608319	0.999317
Cc2d1b	88.2255	0.103497	0.171566	0.603249	0.546343	0.999317
Cc2d2a	247.425	-0.0682699	0.127786	-0.534253	0.593167	0.999317
Ccar1	422.699	-0.139169	0.109734	-1.26824	0.204714	0.999317
Ccbl1	71.1719	0.19311	0.193289	0.999075	0.317758	0.999317
Ccdc101	38.7675	0.106804	0.250964	0.425573	0.670419	0.999317
Ccdc106	38.1324	0.328238	0.244283	1.34368	0.179051	0.999317
Ccdc107	114.494	0.0341798	0.212048	0.161189	0.871945	0.999317
Ccdc112	102.864	0.0472494	0.227151	0.208009	0.835222	0.999317
Ccdc115	70.4804	0.118498	0.243147	0.487351	0.62601	0.999317
Ccdc117	44.1764	0.0255049	0.224469	0.113624	0.909536	0.999317
Ccdc12	116.053	0.00954853	0.161512	0.0591195	0.952857	0.999317
Ccdc120	46.1962	0.454444	0.246381	1.84448	0.0651139	0.999317
Ccdc124	83.0161	0.297153	0.172887	1.71877	0.0856558	0.999317
Ccdc127	265.15	-0.0233144	0.114768	-0.203144	0.839023	0.999317
Ccdc130	34.3978	0.0931664	0.249439	0.373505	0.708773	0.999317
Ccdc132	130.544	-0.0417592	0.216763	-0.192649	0.847234	0.999317
Ccdc136	431.446	0.00408939	0.0994543	0.0411183	0.967202	0.999317
Ccdc141	93.1346	0.0230965	0.183861	0.125619	0.900033	0.999317
Ccdc148	60.365	-0.295617	0.231861	-1.27497	0.202318	0.999317
Ccdc149	72.625	0.21229	0.204123	1.04001	0.298335	0.999317
Ccdc15	32.4722	0.173991	0.288906	0.602242	0.547013	0.999317
Ccdc157	45.5501	0.529506	0.313563	1.68868	0.0912816	0.999317
Ccdc167	55.271	0.207659	0.231957	0.895247	0.370655	0.999317
Ccdc173	40.5531	0.386283	0.269961	1.43089	0.152463	0.999317
Ccdc174	213.916	-0.0223275	0.111269	-0.200663	0.840962	0.999317
Ccdc176	64.9556	-0.0036818	0.247209	-0.0148935	0.988117	0.999317
Ccdc177	288.165	-0.119525	0.169568	-0.704883	0.480883	0.999317
Ccdc18	32.9475	-0.0392253	0.296292	-0.132387	0.894678	0.999317
Ccdc181	104.175	-0.329638	0.178424	-1.8475	0.0646753	0.999317
Ccdc184	83.9849	-0.25846	0.200739	-1.28754	0.197906	0.999317
Ccdc186	409.957	-0.128514	0.103904	-1.23685	0.216143	0.999317
Ccdc22	31.7493	-0.41149	0.255743	-1.609	0.107616	0.999317
Ccdc25	158.15	0.00311063	0.219029	0.0142019	0.988669	0.999317
Ccdc28a	127.862	-0.107579	0.14425	-0.745779	0.455801	0.999317
Ccdc28b	99.8094	-0.0233084	0.180113	-0.12941	0.897033	0.999317
Ccdc32	110.492	-0.0241845	0.172147	-0.140488	0.888275	0.999317
Ccdc34	239.793	-0.188956	0.128324	-1.4725	0.140887	0.999317
Ccdc39	49.5222	0.139423	0.236656	0.589137	0.555769	0.999317
Ccdc43	46.8896	-0.144197	0.346989	-0.415565	0.677728	0.999317
Ccdc47	283.861	0.0642572	0.101744	0.631559	0.527675	0.999317
Ccdc50	354.52	-0.0377993	0.137193	-0.275519	0.782918	0.999317
Ccdc55	229.741	-0.0138504	0.132805	-0.104292	0.916938	0.999317
Ccdc59	319.704	-0.00298134	0.102219	-0.0291661	0.976732	0.999317
Ccdc6	147.366	0.144754	0.216251	0.669377	0.503255	0.999317
Ccdc64	58.1759	-0.0204997	0.186239	-0.110072	0.912352	0.999317
Ccdc66	122.646	-0.293976	0.158455	-1.85527	0.0635575	0.999317
Ccdc71	94.1171	-0.246142	0.184626	-1.33319	0.18247	0.999317
Ccdc74a	129.746	0.199745	0.171785	1.16276	0.244927	0.999317
Ccdc77	62.2061	-0.251928	0.235751	-1.06862	0.285242	0.999317
Ccdc82	371.972	-0.173942	0.135372	-1.28492	0.198821	0.999317
Ccdc84	55.4608	0.0596876	0.215207	0.277349	0.781512	0.999317
Ccdc85a	72.1169	0.0361159	0.240389	0.15024	0.880576	0.999317
Ccdc86	36.8487	0.225463	0.307322	0.733638	0.463169	0.999317
Ccdc88a	1613.9	-0.0629834	0.154256	-0.408304	0.683051	0.999317
Ccdc9	67.9697	-0.151796	0.214236	-0.708547	0.478606	0.999317
Ccdc90b	45.4302	0.223302	0.202189	1.10442	0.269409	0.999317
Ccdc91	155.098	0.112709	0.142246	0.792353	0.428155	0.999317
Ccdc92	468.617	0.0389038	0.0989346	0.393227	0.694151	0.999317
Ccdc93	69.1246	0.0426843	0.195068	0.218818	0.826792	0.999317
Ccdc97	141.049	-0.131918	0.166398	-0.792783	0.427904	0.999317
Cck	267.64	0.0902736	0.160214	0.563456	0.573125	0.999317
Ccm2	62.4282	0.0791196	0.226481	0.349343	0.726832	0.999317
Ccnc	76.862	0.0361359	0.190651	0.18954	0.84967	0.999317
Ccnd1	113.561	-0.0457313	0.186604	-0.245071	0.806401	0.999317
Ccnd3	151.544	0.203034	0.179587	1.13056	0.25824	0.999317
Ccndbp1	177.134	-0.0392544	0.210637	-0.18636	0.852162	0.999317
Ccne2	82.5756	-0.244089	0.241608	-1.01027	0.312367	0.999317
Ccng1	114.168	0.146194	0.151172	0.967072	0.333508	0.999317
Ccng2	71.352	0.299335	0.274214	1.09161	0.275003	0.999317
Ccnh	183.432	0.213787	0.154645	1.38244	0.166836	0.999317
Ccni	597.44	0.00283369	0.0877091	0.0323078	0.974227	0.999317
Ccnjl	48.9715	-0.226601	0.229141	-0.988914	0.322705	0.999317
Ccnk	176.486	0.243025	0.182092	1.33462	0.182	0.999317
Ccnl1	431.098	-0.214198	0.107315	-1.99598	0.0459365	0.999317
Ccnl2	377.549	-0.0641005	0.140346	-0.456733	0.647863	0.999317
Ccnt1	344.751	-0.0597409	0.127032	-0.470281	0.638154	0.999317
Ccnt2	470.695	-0.0476992	0.0955636	-0.499136	0.617683	0.999317
Ccny	159.719	-0.0626894	0.123759	-0.506544	0.612475	0.999317
Ccp110	104.795	0.205331	0.191577	1.07179	0.283812	0.999317
Ccpg1	149.535	0.254441	0.139351	1.82589	0.0678664	0.999317
Ccrn4l	52.0941	0.160808	0.225025	0.714621	0.474843	0.999317
Ccs	56.9132	0.107826	0.204462	0.527366	0.59794	0.999317
Ccsap	67.265	0.0196455	0.208126	0.0943927	0.924797	0.999317
Ccser1	64.2914	-0.134555	0.257188	-0.523179	0.60085	0.999317
Ccser2	403.27	0.0625661	0.0977197	0.640262	0.522003	0.999317
Cct2	333.584	0.0868524	0.149892	0.579432	0.562298	0.999317
Cct3	350.177	0.0518894	0.133569	0.388484	0.697658	0.999317
Cct4	223.848	0.029673	0.144144	0.205856	0.836903	0.999317
Cct5	296.979	-0.098487	0.11332	-0.869107	0.384789	0.999317
Cct6a	77.3119	-0.152105	0.222258	-0.684364	0.493745	0.999317
Cct7	844.866	-0.0678456	0.13616	-0.498277	0.618289	0.999317
Ccz1	149.751	-0.13503	0.146891	-0.919252	0.357964	0.999317
Cd151	137.072	0.0623015	0.15128	0.411829	0.680464	0.999317
Cd164	178.675	0.193749	0.140693	1.3771	0.16848	0.999317
Cd200	80.0037	-0.00117952	0.260419	-0.00452932	0.996386	0.999317
Cd2ap	130.894	-0.0595796	0.231231	-0.257662	0.796668	0.999317
Cd2bp2	132.975	-0.0504877	0.167621	-0.301202	0.763261	0.999317
Cd320	33.452	-0.350915	0.306729	-1.14406	0.2526	0.999317
Cd34	43.8784	0.238832	0.222314	1.0743	0.282687	0.999317
Cd3eap	52.1332	-0.168749	0.23454	-0.719492	0.471838	0.999317
Cd44	33.706	0.425909	0.256073	1.66323	0.096266	0.999317
Cd47	1264.4	-0.0242766	0.124894	-0.194378	0.84588	0.999317
Cd59a	199.252	-0.00304724	0.141643	-0.0215136	0.982836	0.999317
Cd63	931.398	-0.0864076	0.150314	-0.574847	0.565395	0.999317
Cd63-ps	66.1238	0.224073	0.300956	0.744539	0.456551	0.999317
Cd81	1347.48	0.0974196	0.0791085	1.23147	0.218148	0.999317
Cd83	82.5932	-0.0488644	0.180547	-0.270647	0.786662	0.999317
Cd9	67.8293	0.389959	0.213199	1.82908	0.0673869	0.999317
Cd93	31.5651	0.250939	0.254352	0.986582	0.323848	0.999317
Cd99l2	282.541	-0.220231	0.131042	-1.68061	0.0928386	0.999317
Cdadc1	75.5245	0.0309077	0.151332	0.204238	0.838167	0.999317
Cdc123	217.086	0.022329	0.126072	0.177113	0.859419	0.999317
Cdc14b	130.285	0.0678427	0.148194	0.457797	0.647098	0.999317
Cdc16	86.8811	0.1343	0.185975	0.72214	0.470208	0.999317
Cdc23	113.847	0.174889	0.181028	0.966091	0.333999	0.999317
Cdc25a	127.047	0.0811685	0.129402	0.627258	0.53049	0.999317
Cdc26	31.5764	0.169628	0.355652	0.47695	0.633398	0.999317
Cdc27	145.418	-0.0648714	0.128115	-0.506353	0.612609	0.999317
Cdc34	75.1849	0.0426696	0.18108	0.235639	0.813713	0.999317
Cdc37	282.033	0.0503726	0.165095	0.305113	0.76028	0.999317
Cdc37l1	773.709	-0.126388	0.0957537	-1.31993	0.18686	0.999317
Cdc40	102.647	-0.0571021	0.152041	-0.37557	0.707237	0.999317
Cdc42bpa	1408.03	-0.0945979	0.106229	-0.890508	0.373193	0.999317
Cdc42bpb	196.54	-0.219329	0.138967	-1.57828	0.114502	0.999317
Cdc42bpg	113.737	0.355404	0.230756	1.54018	0.123518	0.999317
Cdc42ep1	47.9312	-0.289345	0.273555	-1.05772	0.290181	0.999317
Cdc42ep2	85.4257	-0.0207348	0.191906	-0.108046	0.913959	0.999317
Cdc42ep3	37.71	0.398324	0.349643	1.13923	0.254607	0.999317
Cdc42ep4	397.403	0.056399	0.201412	0.280019	0.779463	0.999317
Cdc42se1	153.96	0.0840154	0.165385	0.507999	0.611454	0.999317
Cdc42se2	139.118	-0.0526421	0.18941	-0.277927	0.781069	0.999317
Cdc5l	304.039	-0.00925931	0.116934	-0.0791841	0.936886	0.999317
Cdc7	59.3292	-0.157272	0.241346	-0.651646	0.514629	0.999317
Cdc73	324.337	-0.058167	0.105355	-0.552103	0.580878	0.999317
Cdca4	32.1481	0.191119	0.288839	0.66168	0.508176	0.999317
Cdh1	53.8986	-0.0715347	0.236874	-0.301995	0.762656	0.999317
Cdh10	56.2991	-0.107714	0.271012	-0.397453	0.691034	0.999317
Cdh11	49.53	-0.168932	0.237661	-0.71081	0.477202	0.999317
Cdh12	34.6228	0.139597	0.271918	0.51338	0.607686	0.999317
Cdh13	175.209	-0.0200705	0.165223	-0.121475	0.903315	0.999317
Cdh15	65.7088	0.163003	0.201259	0.809919	0.417987	0.999317
Cdh18	60.7372	-0.173393	0.255954	-0.677438	0.498128	0.999317
Cdh2	111.94	0.0692023	0.167629	0.41283	0.679731	0.999317
Cdh20	56.6602	0.0992654	0.259326	0.382782	0.701882	0.999317
Cdh22	146.022	-0.144657	0.150017	-0.964268	0.334912	0.999317
Cdh4	104.756	0.105992	0.163007	0.650227	0.515546	0.999317
Cdh7	304.176	0.0596264	0.296265	0.201261	0.840495	0.999317
Cdh8	111.009	-0.318456	0.174252	-1.82756	0.067615	0.999317
Cdip1	475.88	-0.049961	0.0981391	-0.509084	0.610693	0.999317
Cdipt	228.172	0.069484	0.144884	0.479583	0.631524	0.999317
Cdk10	79.9863	-0.0457426	0.210574	-0.217228	0.82803	0.999317
Cdk11b	401.556	-0.201542	0.112841	-1.78607	0.0740886	0.999317
Cdk12	350.517	-0.118104	0.118729	-0.994736	0.319865	0.999317
Cdk14	490.132	-0.119211	0.130821	-0.911248	0.362165	0.999317
Cdk16	666.739	-0.122926	0.160239	-0.767146	0.442994	0.999317
Cdk17	231.639	0.0866409	0.158341	0.54718	0.584255	0.999317
Cdk18	37.317	-0.0464348	0.231346	-0.200716	0.840921	0.999317
Cdk19	675.651	-0.105151	0.123649	-0.850397	0.395104	0.999317
Cdk20	45.275	0.199604	0.220972	0.903298	0.366368	0.999317
Cdk2ap1	64.6518	-0.216216	0.194125	-1.1138	0.265366	0.999317
Cdk2ap2	109.297	0.340256	0.219471	1.55034	0.121059	0.999317
Cdk4	43.2114	-0.0202493	0.224083	-0.0903652	0.927997	0.999317
Cdk5	219.701	-0.0202091	0.108918	-0.185545	0.852802	0.999317
Cdk5r1	919.96	0.0654366	0.103011	0.635239	0.525272	0.999317
Cdk5r2	639.126	-0.000774652	0.136137	-0.00569024	0.99546	0.999317
Cdk5rap1	56.3885	0.123947	0.233198	0.531511	0.595065	0.999317
Cdk5rap2	175.909	-0.314594	0.174694	-1.80082	0.0717306	0.999317
Cdk5rap3	42.9732	0.367708	0.266907	1.37766	0.168307	0.999317
Cdk7	165.867	0.0793714	0.144716	0.548462	0.583375	0.999317
Cdk8	79.2411	0.130441	0.191954	0.679542	0.496794	0.999317
Cdk9	53.3332	0.232655	0.229707	1.01283	0.311139	0.999317
Cdkal1	124.777	0.0632971	0.149151	0.424382	0.671288	0.999317
Cdkl1	176.567	-0.123258	0.128891	-0.956299	0.338921	0.999317
Cdkl2	105.084	-0.216279	0.175564	-1.23191	0.217983	0.999317
Cdkl5	62.9928	-0.168029	0.212995	-0.788886	0.430179	0.999317
Cdkn1a	147.99	0.00576129	0.199503	0.0288783	0.976962	0.999317
Cdkn1b	666.033	0.055592	0.162265	0.3426	0.731899	0.999317
Cdkn1c	57.9224	-0.085755	0.218079	-0.393229	0.694151	0.999317
Cdkn2aip	37.7215	-0.113347	0.232444	-0.487631	0.625811	0.999317
Cdkn2aipnl	112.311	0.155627	0.146269	1.06397	0.287341	0.999317
Cdkn2d	192.09	0.26599	0.153958	1.72769	0.0840444	0.999317
Cdo1	44.4392	-0.193876	0.247354	-0.7838	0.433158	0.999317
Cdon	60.7676	-0.0065549	0.219358	-0.0298822	0.976161	0.999317
Cdr2	86.5192	0.0233287	0.169755	0.137425	0.890695	0.999317
Cdr2l	168.353	0.165582	0.129221	1.28139	0.200057	0.999317
Cds1	486.041	0.12241	0.11718	1.04463	0.296193	0.999317
Cds2	627.185	0.157413	0.142098	1.10778	0.267959	0.999317
Cdv3	94.5987	-0.151067	0.22135	-0.682478	0.494937	0.999317
Cdyl	296.508	0.143664	0.154751	0.928356	0.353223	0.999317
Cdyl2	180.824	0.0679365	0.13927	0.487803	0.625689	0.999317
Cebpg	181.485	0.014546	0.149637	0.0972088	0.922561	0.999317
Cebpz	313.065	-0.0481241	0.159566	-0.301594	0.762961	0.999317
Cebpzos	59.6719	0.256203	0.228433	1.12157	0.262047	0.999317
Cecr2	46.6604	-0.152454	0.206118	-0.739642	0.459517	0.999317
Celf1	896.843	-0.0127026	0.120469	-0.105443	0.916025	0.999317
Celf2	1699.44	0.0447178	0.0868822	0.514694	0.606767	0.999317
Celf4	3490.57	0.0978594	0.11277	0.867776	0.385517	0.999317
Celf5	141.413	0.0471544	0.178713	0.263856	0.791891	0.999317
Celf6	47.9634	0.0507066	0.214793	0.236072	0.813376	0.999317
Celsr2	314.692	-0.0627714	0.12291	-0.510712	0.609553	0.999317
Celsr3	207.88	0.0578076	0.182559	0.316652	0.751508	0.999317
Cend1	467.725	-0.0213202	0.106162	-0.200828	0.840833	0.999317
Cenpb	147.601	0.0673199	0.130937	0.514139	0.607155	0.999317
Cenpc1	152.128	-0.187225	0.172801	-1.08347	0.2786	0.999317
Cenpv	82.3177	-0.183609	0.17835	-1.02949	0.303251	0.999317
Cep104	91.6337	-0.0206784	0.200762	-0.102999	0.917964	0.999317
Cep120	179.724	0.0247868	0.144121	0.171986	0.863449	0.999317
Cep131	49.5142	0.00836843	0.176752	0.0473456	0.962238	0.999317
Cep135	115.064	0.138126	0.159963	0.863487	0.38787	0.999317
Cep162	164.911	-0.176696	0.133096	-1.32758	0.184316	0.999317
Cep164	70.8521	-0.181205	0.20837	-0.86963	0.384503	0.999317
Cep170	231.192	-0.20165	0.159605	-1.26343	0.206433	0.999317
Cep170b	524.496	-0.127231	0.141283	-0.900542	0.367832	0.999317
Cep19	144.58	-0.00932011	0.134775	-0.0691532	0.944868	0.999317
Cep250	93.2093	-0.0416871	0.260671	-0.159922	0.872942	0.999317
Cep290	481.772	-0.173572	0.0998075	-1.73906	0.0820236	0.999317
Cep295	170.796	-0.227387	0.13726	-1.65662	0.0975969	0.999317
Cep350	393.819	-0.222572	0.129225	-1.72237	0.0850034	0.999317
Cep57	125.218	-0.139314	0.13204	-1.05509	0.291386	0.999317
Cep57l1	40.1686	0.0214312	0.212662	0.100776	0.919729	0.999317
Cep63	84.2665	0.0675062	0.275883	0.244692	0.806695	0.999317
Cep68	42.0357	-0.00298081	0.230412	-0.0129369	0.989678	0.999317
Cep70	193.329	0.0929299	0.149683	0.620846	0.534701	0.999317
Cep78	36.256	0.355719	0.297029	1.19759	0.231076	0.999317
Cep83	189.232	-0.17729	0.148367	-1.19494	0.23211	0.999317
Cep85	36.1211	0.129579	0.301997	0.429074	0.667869	0.999317
Cep85l	88.8776	-0.0232926	0.184406	-0.126311	0.899486	0.999317
Cep89	38.2189	0.00102623	0.245483	0.00418047	0.996664	0.999317
Cep97	82.6514	0.0327677	0.227172	0.144242	0.885309	0.999317
Cept1	164.042	0.199579	0.14638	1.36344	0.172745	0.999317
Cerk	461.219	0.0356566	0.0959566	0.371591	0.710197	0.999317
Cerkl	36.54	-0.553333	0.316367	-1.74902	0.0802872	0.999317
Cers2	278.351	0.049246	0.130481	0.377419	0.705862	0.999317
Cers4	413.631	-0.0479549	0.127685	-0.375571	0.707236	0.999317
Cers5	112.903	-0.208945	0.18071	-1.15624	0.247581	0.999317
Cers6	120.09	0.0871438	0.195035	0.446811	0.655011	0.999317
Cetn2	165.566	0.0551739	0.134722	0.409538	0.682145	0.999317
Cetn3	1240.3	-0.227813	0.131044	-1.73845	0.0821323	0.999317
Cfap20	94.4917	0.482207	0.247703	1.94672	0.0515688	0.999317
Cfap36	317.603	-0.218954	0.16449	-1.33111	0.183154	0.999317
Cfap69	32.6867	-0.0903144	0.243563	-0.370805	0.710783	0.999317
Cfap97	206.484	-0.145549	0.147215	-0.988684	0.322818	0.999317
Cfdp1	368.921	0.0339542	0.111411	0.304764	0.760546	0.999317
Cfl1	635.176	0.0832755	0.148768	0.559768	0.575638	0.999317
Cflar	74.6788	0.0420596	0.206788	0.203395	0.838826	0.999317
Cfp	42.0912	-0.0516125	0.257322	-0.200575	0.841031	0.999317
Cggbp1	343.169	0.0962214	0.0915026	1.05157	0.292997	0.999317
Cgn	39.3802	0.0651883	0.305559	0.213341	0.831061	0.999317
Cgnl1	241.58	0.0871907	0.121713	0.716365	0.473766	0.999317
Cgrrf1	103.09	-0.112153	0.164921	-0.680043	0.496477	0.999317
Champ1	123.741	-0.0784075	0.157548	-0.497675	0.618713	0.999317
Chat	44.3085	-0.696172	0.488912	-1.42392	0.15447	0.999317
Chchd1	276.223	0.106146	0.135164	0.785316	0.432268	0.999317
Chchd10	1914.61	-0.128268	0.116148	-1.10435	0.26944	0.999317
Chchd2	4145.55	-0.146807	0.165494	-0.887083	0.375034	0.999317
Chchd3	188.637	0.0589225	0.132418	0.444973	0.656339	0.999317
Chchd4	98.0789	0.121207	0.1906	0.635923	0.524827	0.999317
Chchd5	49.6506	0.0287623	0.241011	0.11934	0.905006	0.999317
Chchd6	129.951	0.00277281	0.179047	0.0154865	0.987644	0.999317
Chchd7	221.991	-0.187988	0.128306	-1.46515	0.142879	0.999317
Chd1	297.262	-0.180558	0.115008	-1.56996	0.116426	0.999317
Chd2	553.86	-0.214327	0.111117	-1.92884	0.0537503	0.999317
Chd3	996.299	-0.217908	0.121278	-1.79676	0.0723733	0.999317
Chd3os	594.701	-0.003557	0.132867	-0.026771	0.978642	0.999317
Chd4	1063.63	-0.028353	0.0965705	-0.293599	0.769064	0.999317
Chd6	641.619	-0.134572	0.0977717	-1.37639	0.1687	0.999317
Chd7	2386.31	-0.0601103	0.134665	-0.446369	0.655331	0.999317
Chd8	576.888	-0.0881586	0.0911139	-0.967566	0.333261	0.999317
Chd9	743.31	-0.188893	0.0942602	-2.00395	0.0450752	0.999317
Cherp	144.182	0.0658592	0.159174	0.413755	0.679053	0.999317
Chfr	164.371	-0.0509939	0.187067	-0.272597	0.785163	0.999317
Chga	592.874	0.0178793	0.101891	0.175474	0.860707	0.999317
Chgb	2123.41	-0.00872131	0.0835019	-0.104444	0.916817	0.999317
Chic1	278.121	-0.104921	0.116207	-0.902878	0.36659	0.999317
Chic2	89.1514	-0.0874995	0.175315	-0.499098	0.61771	0.999317
Chid1	99.1112	0.0750227	0.146772	0.511151	0.609245	0.999317
Chka	570.08	-0.0589635	0.117911	-0.500067	0.617028	0.999317
Chkb	158.599	0.110263	0.14063	0.784068	0.433	0.999317
Chl1	1153.94	-0.0286428	0.111365	-0.257198	0.797026	0.999317
Chm	184.73	-0.036723	0.123211	-0.298049	0.765666	0.999317
Chml	48.2281	-0.0545893	0.224949	-0.242675	0.808258	0.999317
Chmp1a	153.162	-0.113657	0.204889	-0.554723	0.579084	0.999317
Chmp2a	241.565	-0.00390322	0.129299	-0.0301877	0.975917	0.999317
[truncated: 21,000 more rows]

## Sheet: WT_U_vs_TS_T
Gene	baseMean	log2FoldChange	lfcSE	stat	pvalue	padj
Son	3080.02	0.545101	0.098575	5.52982	3.21e-08	0.000364004
Cct8	479.811	0.485103	0.0959267	5.05701	4.26e-07	0.00241788
Ttc3	7296.97	0.47813	0.0971637	4.92087	8.62e-07	0.00326118
Dyrk1a	383.416	0.536489	0.112606	4.7643	1.9e-06	0.00537963
Cryzl1	207.69	0.717891	0.159223	4.50871	6.52e-06	0.0148124
Tmem50b	217.626	0.556252	0.126217	4.40712	1.05e-05	0.0198246
Atp5o	821.044	0.435807	0.102112	4.26793	1.97e-05	0.0284703
Brwd1	411.24	0.451622	0.105909	4.26424	2.01e-05	0.0284703
Hmgn1	231.188	0.543665	0.132549	4.10162	4.1e-05	0.0517611
Ifnar2	44.1489	0.933178	0.229228	4.07096	4.68e-05	0.0531627
Snora30	19.6121	2.26162	0.559568	4.04172	5.31e-05	0.0547719
Mpc1	64.8633	0.770293	0.198584	3.87893	0.000104917	0.0992779
Arid1b	342.525	0.44126	0.118785	3.71477	0.000203385	0.17172
Wrb	168.099	0.403045	0.108796	3.70461	0.00021172	0.17172
Ets2	265.044	0.730303	0.198319	3.68247	0.000230985	0.174855
Dopey2	148.552	0.444487	0.124061	3.58282	0.000339898	0.241222
Paxbp1	365.941	0.655268	0.185636	3.52985	0.000415793	0.277725
Itsn1	690.665	0.54584	0.155414	3.51217	0.000444467	0.280385
Nup35	21.3403	0.886842	0.260965	3.39831	0.000678031	0.384952
Synj1	1168.74	0.488818	0.143271	3.41185	0.000645229	0.384952
Sema3f	14.7654	1.14423	0.34075	3.35797	0.000785166	0.42455
Tulp4	1389.29	0.701363	0.210973	3.32441	0.000886047	0.457321
Bach1	56.7101	0.739626	0.22601	3.27254	0.00106586	0.51202
Ezr	79.2373	0.534511	0.163547	3.26823	0.00108221	0.51202
Arpc2	573.186	0.31779	0.0975975	3.25613	0.00112944	0.51299
Dscaml1	29.7663	0.700226	0.216486	3.23451	0.00121854	0.52762
Shisa7	17.5508	1.27278	0.394516	3.22617	0.00125458	0.52762
Ift57	85.6387	0.504779	0.1585	3.18473	0.00144892	0.587587
Polr3a	35.1702	-0.555377	0.176862	-3.14017	0.0016885	0.618894
Slc39a6	95.3291	0.388737	0.123803	3.13997	0.00168963	0.618894
Srl	14.3893	1.27027	0.40292	3.15266	0.00161791	0.618894
Hlcs	38.5857	0.601975	0.19248	3.12747	0.0017632	0.625662
RP23-21P2,7	34.3539	-0.619107	0.199801	-3.09862	0.00194425	0.669
Cyyr1	13.1011	1.31326	0.426715	3.07761	0.00208669	0.696894
Slc5a3	271.414	0.514748	0.167761	3.06834	0.0021525	0.698334
Eif2ak1	141.961	-0.341384	0.111939	-3.04972	0.00229053	0.722472
1110004E09Rik	111.578	0.423556	0.140497	3.01469	0.00257243	0.760277
Aifm2	28.1917	0.782839	0.260067	3.01014	0.00261125	0.760277
Csdc2	82.0157	0.571944	0.18929	3.02152	0.00251512	0.760277
Mfap3l	72.9507	0.49573	0.165781	2.99028	0.00278725	0.791231
Gm26205	19.9764	0.868649	0.293145	2.96321	0.00304448	0.843172
A330076H08Rik	296.974	-0.476141	0.161574	-2.94688	0.00320994	0.847649
Ebf2	68.0448	0.651595	0.220915	2.94953	0.00318255	0.847649
Ltn1	150.003	0.455641	0.155752	2.92543	0.00343979	0.851533
Morc3	72.9004	0.52593	0.179721	2.92636	0.0034295	0.851533
Ppp4r1	53.676	0.662893	0.226665	2.92454	0.00344963	0.851533
Cdyl	280.04	0.700001	0.241416	2.89957	0.00373677	0.862462
Rft1	17.8222	-0.806295	0.278562	-2.89449	0.00379772	0.862462
Sh3bgr	65.5377	0.589399	0.203564	2.8954	0.00378679	0.862462
Urb1	14.9447	1.17044	0.402469	2.90816	0.00363566	0.862462
Fgfr1op	105.477	0.571077	0.198191	2.88144	0.00395858	0.881367
Bdnf	89.1626	0.566749	0.19842	2.8563	0.00428606	0.928568
Smndc1	123.837	-0.327311	0.114735	-2.85276	0.00433413	0.928568
App	2775.9	0.617107	0.218959	2.81837	0.00482683	0.947355
Capza1	19.803	1.30162	0.459792	2.83089	0.00464191	0.947355
Dscr3	50.8119	0.625023	0.220136	2.83926	0.00452177	0.947355
Hba-a1	1137.58	-0.64966	0.230172	-2.8225	0.00476513	0.947355
Tmem104	27.8771	-0.487852	0.173147	-2.81756	0.00483898	0.947355
4930589L23Rik	14.4485	4.49861	1.60484	2.80315	0.00506062	0.954887
Col5a3	12.9587	0.835117	0.298387	2.79877	0.00512973	0.954887
Fxyd5	13.4685	0.964162	0.34447	2.79897	0.00512659	0.954887
0610007P14Rik	219.778	0.0295509	0.118008	0.250414	0.802267	0.999499
0610009B22Rik	17.0508	0.318838	0.481059	0.662783	0.50747	0.999499
0610009O20Rik	69.9973	0.00462879	0.23864	0.0193965	0.984525	0.999499
0610010F05Rik	123.947	-0.0161049	0.137	-0.117554	0.906421	0.999499
0610011F06Rik	69.5441	0.0330991	0.16892	0.195945	0.844653	0.999499
0610030E20Rik	68.7622	-0.196931	0.163147	-1.20708	0.227403	0.999499
0610037L13Rik	58.5149	-0.0465526	0.197857	-0.235284	0.813988	0.999499
0610043K17Rik	15.7236	-0.158129	0.288764	-0.547608	0.583961	0.999499
1110001J03Rik	251.021	-0.0811746	0.138631	-0.585543	0.558182	0.999499
1110002L01Rik	13.869	0.18367	0.355881	0.516098	0.605786	0.999499
1110004F10Rik	240.953	0.0830686	0.181981	0.456468	0.648053	0.999499
1110007C09Rik	27.9757	0.0738451	0.245161	0.301211	0.763254	0.999499
1110008F13Rik	223.715	0.0709954	0.131173	0.541234	0.588347	0.999499
1110008P14Rik	139.77	0.048336	0.149242	0.323876	0.746032	0.999499
1110032A03Rik	73.5904	0.0254461	0.301622	0.0843643	0.932767	0.999499
1110034G24Rik	18.6437	0.594928	0.295648	2.01228	0.0441901	0.999499
1110037F02Rik	81.9257	-0.124699	0.200307	-0.622539	0.533588	0.999499
1110038B12Rik	18.1724	-0.0526123	0.374085	-0.140643	0.888152	0.999499
1110038F14Rik	67.4802	-0.00461187	0.141463	-0.0326012	0.973993	0.999499
1110046J04Rik	12.8831	0.257234	0.299808	0.857998	0.390893	0.999499
1110051M20Rik	101.504	-0.182839	0.20093	-0.909965	0.362841	0.999499
1110054M08Rik	14.6392	-0.323463	0.277068	-1.16745	0.243028	0.999499
1110057K04Rik	49.4226	-0.0311762	0.159691	-0.195228	0.845215	0.999499
1110058L19Rik	44.2479	-0.0432305	0.295577	-0.146258	0.883718	0.999499
1110059E24Rik	64.1457	-0.071362	0.185881	-0.383912	0.701043	0.999499
1110059G10Rik	48.3243	-0.182469	0.196853	-0.926932	0.353962	0.999499
1110065P20Rik	81.145	-0.156162	0.171796	-0.908995	0.363353	0.999499
1190002N15Rik	150.084	-0.0920856	0.166663	-0.552526	0.580588	0.999499
1200014J11Rik	113.348	0.0988098	0.142148	0.695121	0.486979	0.999499
1300002E11Rik	39.5799	0.06477	0.220534	0.293697	0.76899	0.999499
1500004A13Rik	82.2484	0.0452883	0.219487	0.206337	0.836528	0.999499
1500009C09Rik	209.991	0.0825869	0.182384	0.45282	0.650678	0.999499
1500009L16Rik	25.1077	0.115723	0.209964	0.551155	0.581527	0.999499
1500011B03Rik	126.68	-0.0784972	0.15874	-0.494503	0.620951	0.999499
1500011K16Rik	60.1041	0.0200201	0.191971	0.104287	0.916942	0.999499
1500012F01Rik	116.784	-0.0719044	0.228301	-0.314954	0.752797	0.999499
1500015A07Rik	12.9095	-0.0707551	0.312956	-0.226086	0.821134	0.999499
1500015O10Rik	32.6054	-0.904806	0.398534	-2.27034	0.0231871	0.999499
1600002H07Rik	14.0616	-0.36803	0.375116	-0.981111	0.326538	0.999499
1600002K03Rik	28.4231	0.280688	0.30184	0.929923	0.352411	0.999499
1600012H06Rik	19.3128	0.0314138	0.337045	0.0932037	0.925742	0.999499
1600014C10Rik	43.0676	-0.114139	0.19166	-0.595529	0.55149	0.999499
1600020E01Rik	14.7249	-0.172453	0.290728	-0.593178	0.553062	0.999499
1700019D03Rik	13.8925	0.552657	0.38892	1.421	0.155316	0.999499
1700020I14Rik	1569.45	0.0783412	0.10541	0.743201	0.45736	0.999499
1700021F05Rik	51.7926	-0.0746122	0.174402	-0.427818	0.668783	0.999499
1700021K19Rik	112.808	-0.0275292	0.155461	-0.177082	0.859444	0.999499
1700025G04Rik	352.866	0.124085	0.173233	0.716289	0.473813	0.999499
1700028B04Rik	37.9082	0.0473372	0.221303	0.213902	0.830623	0.999499
1700029J07Rik	19.4199	0.53267	0.345979	1.5396	0.123657	0.999499
1700037H04Rik	73.1351	-0.0297885	0.230565	-0.129198	0.897201	0.999499
1700047M11Rik	30.6484	-0.0608538	0.210423	-0.289198	0.77243	0.999499
1700048O20Rik	16.0885	-0.331696	0.409315	-0.810369	0.417728	0.999499
1700052K11Rik	20.8484	0.5124	0.364767	1.40473	0.160101	0.999499
1700052N19Rik	61.6059	0.232473	0.233412	0.995976	0.319262	0.999499
1700066M21Rik	21.5621	0.0929551	0.468307	0.198492	0.84266	0.999499
1700084C01Rik	30.1192	0.443912	0.357457	1.24186	0.214288	0.999499
1700109H08Rik	16.5885	0.102539	0.313988	0.326569	0.743994	0.999499
1700123O20Rik	27.2689	0.109665	0.189746	0.577955	0.563294	0.999499
1700124L16Rik	39.4155	-0.0555334	0.27213	-0.20407	0.838299	0.999499
1810013L24Rik	119.357	0.0893536	0.274013	0.326093	0.744354	0.999499
1810022K09Rik	85.5536	0.251529	0.16782	1.4988	0.133925	0.999499
1810026B05Rik	18.9503	-0.0813523	0.259604	-0.31337	0.753999	0.999499
1810026J23Rik	72.0302	0.197121	0.173569	1.13569	0.256087	0.999499
1810030O07Rik	83.4547	-0.0313457	0.207554	-0.151024	0.879957	0.999499
1810037I17Rik	134.787	-0.146288	0.298518	-0.490046	0.624101	0.999499
1810041L15Rik	32.1019	-0.050966	0.27344	-0.186388	0.85214	0.999499
1810043G02Rik	42.7469	0.202245	0.246782	0.819527	0.412486	0.999499
1810043H04Rik	118.572	-0.138924	0.182428	-0.761525	0.446343	0.999499
1810055G02Rik	16.8921	-0.00454512	0.268332	-0.0169384	0.986486	0.999499
1810058I24Rik	74.7957	-0.0751508	0.136645	-0.549971	0.582339	0.999499
2010001A14Rik	21.0996	0.0909125	0.471283	0.192904	0.847034	0.999499
2010012O05Rik	91.5202	0.0953204	0.142671	0.668112	0.504062	0.999499
2010107E04Rik	507.119	-0.0056744	0.155425	-0.036509	0.970876	0.999499
2010107G23Rik	41.3523	0.112323	0.236506	0.474927	0.634839	0.999499
2010111I01Rik	40.4087	0.0529796	0.214993	0.246424	0.805354	0.999499
2010204K13Rik	23.139	0.223978	0.448511	0.499381	0.617511	0.999499
2010300C02Rik	23.1995	-0.0144597	0.268487	-0.0538563	0.95705	0.999499
2010315B03Rik	21.7149	-0.395922	0.282421	-1.40189	0.160949	0.999499
2010320M18Rik	29.5819	0.0673546	0.250548	0.268829	0.788061	0.999499
2210013O21Rik	82.9018	0.164929	0.146966	1.12223	0.261766	0.999499
2210015D19Rik	55.7732	-0.0921801	0.164342	-0.560902	0.574864	0.999499
2210016F16Rik	16.0796	-0.0576316	0.235246	-0.244985	0.806468	0.999499
2210016L21Rik	316.812	0.179295	0.166438	1.07725	0.281371	0.999499
2210017G18Rik	51.5942	0.297491	0.253964	1.17139	0.241443	0.999499
2210018M11Rik	136.988	0.158994	0.120354	1.32106	0.186483	0.999499
2210408F21Rik	37.3842	0.373079	0.200696	1.85893	0.0630377	0.999499
2210418O10Rik	14.981	-0.314852	0.276815	-1.13741	0.255366	0.999499
2300009A05Rik	101.393	-0.0842095	0.158224	-0.532218	0.594575	0.999499
2310003H01Rik	74.509	0.601491	0.304823	1.97324	0.048468	0.999499
2310009B15Rik	19.6604	0.28534	0.280476	1.01734	0.308991	0.999499
2310010J17Rik	29.5287	-0.114444	0.230078	-0.497413	0.618898	0.999499
2310011J03Rik	28.6862	-0.169641	0.241745	-0.701736	0.482844	0.999499
2310015A10Rik	20.1576	0.0845091	0.285113	0.296406	0.76692	0.999499
2310022A10Rik	37.4824	-0.195376	0.232189	-0.841451	0.400095	0.999499
2310022B05Rik	135.767	-0.154807	0.18102	-0.85519	0.392446	0.999499
2310033P09Rik	97.9384	-0.111086	0.146343	-0.75908	0.447805	0.999499
2310035C23Rik	164.68	-0.143828	0.137842	-1.04343	0.296748	0.999499
2310036O22Rik	259.811	0.163841	0.178719	0.91675	0.359274	0.999499
2310039H08Rik	16.6349	0.0558809	0.382009	0.146281	0.883699	0.999499
2310045N01Rik	49.3995	0.0523677	0.251742	0.208021	0.835212	0.999499
2310047M10Rik	116.957	-0.0470482	0.177678	-0.264795	0.791167	0.999499
2310057M21Rik	40.0232	0.0334975	0.192074	0.174399	0.861552	0.999499
2310061I04Rik	155.004	-0.0124213	0.142942	-0.0868973	0.930753	0.999499
2310067B10Rik	46.5159	0.00835848	0.230117	0.0363227	0.971025	0.999499
2410002F23Rik	68.8831	0.150538	0.260517	0.577843	0.56337	0.999499
2410004B18Rik	53.0708	-0.0691716	0.176095	-0.392808	0.694462	0.999499
2410004N09Rik	55.6954	-0.132402	0.237502	-0.557478	0.577201	0.999499
2410006H16Rik	92.4063	-0.0404654	0.190037	-0.212935	0.831378	0.999499
2410015M20Rik	89.1526	-0.0370281	0.169509	-0.218443	0.827084	0.999499
2410016O06Rik	42.4739	-0.324061	0.185257	-1.74926	0.0802468	0.999499
2410089E03Rik	192.366	0.0501643	0.18133	0.276646	0.782052	0.999499
2410124H12Rik	16.0425	0.0648925	0.416097	0.155955	0.876068	0.999499
2410127L17Rik	19.3321	-0.127032	0.275693	-0.460774	0.644961	0.999499
2410131K14Rik	43.0655	-0.0130231	0.174107	-0.0747994	0.940374	0.999499
2510002D24Rik	66.6932	-0.131253	0.17529	-0.748776	0.453992	0.999499
2510003E04Rik	178.616	0.0584552	0.128947	0.453327	0.650314	0.999499
2510009E07Rik	109.907	-0.186624	0.153294	-1.21743	0.223442	0.999499
2510039O18Rik	52.9998	0.149983	0.20006	0.749687	0.453443	0.999499
2610001J05Rik	60.7757	0.158629	0.219213	0.723629	0.469294	0.999499
2610002J02Rik	81.1988	-0.208881	0.228568	-0.913866	0.360787	0.999499
2610002M06Rik	70.5763	-0.125863	0.237034	-0.530993	0.595423	0.999499
2610008E11Rik	47.906	0.111877	0.171137	0.653725	0.513289	0.999499
2610015P09Rik	44.3409	-0.369721	0.185504	-1.99306	0.0462545	0.999499
2610021A01Rik	16.0211	-0.0801852	0.316789	-0.253118	0.800177	0.999499
2610034B18Rik	15.9152	0.209869	0.345447	0.607527	0.543501	0.999499
2610037D02Rik	53.6897	0.103098	0.16793	0.613935	0.539259	0.999499
2610044O15Rik8	15.6585	-0.287649	0.319495	-0.900325	0.367947	0.999499
2610203C20Rik	204.49	0.0239181	0.148441	0.161129	0.871992	0.999499
2610301B20Rik	65.9647	-0.0623924	0.167944	-0.371506	0.710261	0.999499
2610507B11Rik	367.058	-0.164036	0.135027	-1.21485	0.224425	0.999499
2610524H06Rik	18.3133	-0.14446	0.205181	-0.704059	0.481396	0.999499
2700029M09Rik	119.106	0.103999	0.179975	0.577854	0.563363	0.999499
2700049A03Rik	40.0331	-0.493447	0.228375	-2.16069	0.0307192	0.999499
2700060E02Rik	75.6885	-0.312733	0.164438	-1.90183	0.0571935	0.999499
2700062C07Rik	21.1658	0.0928359	0.208798	0.444621	0.656594	0.999499
2700081O15Rik	14.5313	-0.232118	0.33027	-0.702812	0.482173	0.999499
2700089E24Rik	331.859	-0.240502	0.2406	-0.999592	0.317508	0.999499
2700094K13Rik	43.6843	-0.141479	0.174667	-0.809991	0.417945	0.999499
2700097O09Rik	46.7439	-0.164816	0.194932	-0.845504	0.397829	0.999499
2810001G20Rik	52.3864	0.136591	0.307106	0.444768	0.656487	0.999499
2810004N23Rik	100.31	-0.0516746	0.14804	-0.349059	0.727045	0.999499
2810006K23Rik	44.6686	-0.205026	0.180362	-1.13675	0.255642	0.999499
2810008D09Rik	114.707	0.108178	0.176632	0.612447	0.540242	0.999499
2810013P06Rik	99.3732	0.0464711	0.150127	0.309544	0.756908	0.999499
2810021J22Rik	13.6989	-0.290313	0.309553	-0.937848	0.348323	0.999499
2810025M15Rik	35.5566	0.26716	0.196889	1.35691	0.174811	0.999499
2810402E24Rik	14.5584	0.265538	0.292356	0.908269	0.363736	0.999499
2810403A07Rik	173.767	-0.0238933	0.231741	-0.103104	0.917881	0.999499
2810408M09Rik	72.2299	0.0936243	0.17819	0.52542	0.599291	0.999499
2810428I15Rik	90.916	0.0040191	0.176852	0.0227258	0.981869	0.999499
2810459M11Rik	13.0414	-0.429769	0.428551	-1.00284	0.315937	0.999499
2810468N07Rik	69.0177	-0.0843142	0.268854	-0.313606	0.753821	0.999499
2810474O19Rik	207.535	0.0078219	0.13727	0.0569819	0.95456	0.999499
2900011O08Rik	243.509	-0.00769552	0.15105	-0.0509469	0.959368	0.999499
2900026A02Rik	24.7809	0.423512	0.237798	1.78097	0.0749166	0.999499
2900052L18Rik	20.3344	-0.178181	0.261371	-0.681719	0.495417	0.999499
2900052N01Rik	58.3013	0.813002	0.296345	2.74343	0.00608006	0.999499
2900055J20Rik	15.2244	0.0726068	0.351731	0.206427	0.836457	0.999499
2900076A07Rik	14.3178	0.46886	0.343791	1.36379	0.172633	0.999499
2900093K20Rik	38.8323	0.384302	0.308431	1.24599	0.212768	0.999499
3010026O09Rik	17.2191	-0.399944	0.327009	-1.22304	0.221316	0.999499
3110002H16Rik	17.7628	0.752043	0.354863	2.11925	0.0340696	0.999499
3110021A11Rik	15.6188	0.342695	0.357215	0.959351	0.337382	0.999499
3110021N24Rik	56.6254	0.0221344	0.253174	0.0874279	0.930331	0.999499
3110035E14Rik	49.5285	0.118358	0.265256	0.446203	0.655451	0.999499
3110043O21Rik	65.4167	-0.233598	0.18955	-1.23238	0.217807	0.999499
3110057O12Rik	57.1101	-0.160742	0.152023	-1.05735	0.290352	0.999499
3110062M04Rik	17.5863	0.336996	0.300886	1.12001	0.26271	0.999499
3222401L13Rik	52.0694	0.208351	0.23674	0.880084	0.378814	0.999499
3632451O06Rik	217.66	0.0570249	0.152693	0.37346	0.708806	0.999499
3632454L22Rik	13.533	-0.257857	0.369671	-0.697531	0.485471	0.999499
3830406C13Rik	72.9384	0.104345	0.155061	0.672933	0.50099	0.999499
4632415L05Rik	60.7608	-0.18162	0.244446	-0.742987	0.457489	0.999499
4632427E13Rik	230.709	0.173932	0.161293	1.07836	0.280872	0.999499
4732440D04Rik	16.4646	0.3694	0.338324	1.09186	0.274897	0.999499
4833420G17Rik	70.4908	0.0588608	0.226766	0.259567	0.795198	0.999499
4833439L19Rik	90.073	0.0827374	0.289727	0.28557	0.775208	0.999499
4921504A21Rik	32.7141	-0.190875	0.209629	-0.910536	0.36254	0.999499
4921524J17Rik	28.4491	-0.0380347	0.228484	-0.166465	0.867791	0.999499
4921531C22Rik	14.9165	0.604492	0.251449	2.40403	0.0162154	0.999499
4930402H24Rik	197.345	0.129628	0.11081	1.16982	0.242075	0.999499
4930430F08Rik	50.4309	-0.0337647	0.241615	-0.139746	0.888861	0.999499
4930432E11Rik	13.8104	0.721568	0.522099	1.38205	0.166955	0.999499
4930447C04Rik	25.7094	0.386875	0.344821	1.12196	0.26188	0.999499
4930453N24Rik	53.4246	-0.0811257	0.209161	-0.387863	0.698117	0.999499
4930503L19Rik	24.2079	0.216446	0.450801	0.480136	0.63113	0.999499
4930506M07Rik	85.1538	0.0654115	0.184474	0.354583	0.722902	0.999499
4930518I15Rik	18.0797	-0.176398	0.267978	-0.658257	0.510373	0.999499
4930523C07Rik	20.2056	0.0405595	0.371414	0.109203	0.913042	0.999499
4930526A20Rik	39.4977	-0.186162	0.73335	-0.253851	0.799611	0.999499
4930563E22Rik	14.6361	-0.310219	0.316081	-0.981455	0.326368	0.999499
4930570G19Rik	25.7198	-0.0169789	0.314733	-0.053947	0.956977	0.999499
4930581F22Rik	20.3188	0.143252	0.265598	0.539357	0.589641	0.999499
4930594M22Rik	57.8896	0.254911	0.300928	0.847084	0.396948	0.999499
4931406C07Rik	36.6693	-0.152613	0.237092	-0.643688	0.519778	0.999499
4931406P16Rik	132.381	0.140024	0.219097	0.639096	0.52276	0.999499
4931428F04Rik	37.3802	0.201172	0.295439	0.680928	0.495917	0.999499
4932438A13Rik	573.881	0.11353	0.110631	1.02621	0.304795	0.999499
4933408B17Rik	13.2089	-0.00654086	0.357345	-0.018304	0.985396	0.999499
4933426M11Rik	77.6756	0.0898991	0.266408	0.337449	0.735778	0.999499
4933427D14Rik	70.0735	-0.0587306	0.146146	-0.401864	0.687784	0.999499
4933431E20Rik	75.2941	-0.175131	0.194029	-0.902602	0.366737	0.999499
4933434E20Rik	144.442	-0.178139	0.123437	-1.44316	0.148976	0.999499
4933439C10Rik	48.6454	0.42684	0.321267	1.32861	0.183975	0.999499
5031420N21Rik	29.0594	0.114009	0.214699	0.531014	0.595409	0.999499
5031425E22Rik	62.2154	-0.0627852	0.200477	-0.313179	0.754144	0.999499
5031434O11Rik	43.0729	-0.0893933	0.219765	-0.406769	0.684178	0.999499
5031439G07Rik	276.843	-0.116384	0.13547	-0.859111	0.390279	0.999499
5330417C22Rik	16.3556	0.492052	0.342756	1.43558	0.151123	0.999499
5330438D12Rik	33.14	-0.364481	0.239767	-1.52015	0.128475	0.999499
5430405H02Rik	61.27	0.176142	0.18328	0.961052	0.336526	0.999499
5530601H04Rik	43.9715	0.180684	0.204144	0.88508	0.376114	0.999499
5730409E04Rik	277.675	-0.137363	0.135586	-1.01311	0.311009	0.999499
5730455P16Rik	241.782	-0.28327	0.146008	-1.94009	0.0523685	0.999499
5830416P10Rik	50.304	-0.00974251	0.355358	-0.0274161	0.978128	0.999499
5830428H23Rik	148.586	0.0381354	0.145323	0.262418	0.792999	0.999499
6030419C18Rik	69.5305	-0.120786	0.445851	-0.27091	0.78646	0.999499
6030458C11Rik	38.7896	-0.258486	0.20169	-1.2816	0.199983	0.999499
6230415J03Rik	48.1551	0.290201	0.26769	1.08409	0.278323	0.999499
6330403A02Rik	13.881	0.510045	0.372178	1.37043	0.170552	0.999499
6330403K07Rik	166.431	-0.0617401	0.26427	-0.233625	0.815276	0.999499
6330403L08Rik	23.6249	0.151977	0.248672	0.611155	0.541097	0.999499
6330408A02Rik	55.757	0.0429132	0.232513	0.184563	0.853572	0.999499
6330416G13Rik	28.5702	-0.123634	0.244506	-0.505647	0.613104	0.999499
6330418K02Rik	32.73	-0.13756	0.175274	-0.78483	0.432553	0.999499
6330419J24Rik	38.061	-0.138368	0.212991	-0.649644	0.515923	0.999499
6430548M08Rik	651.218	0.0294456	0.0943237	0.312176	0.754907	0.999499
6430571L13Rik	74.078	-0.21332	0.329727	-0.64696	0.517658	0.999499
6430573F11Rik	177.438	0.332941	0.271834	1.22479	0.220653	0.999499
6430590A07Rik	22.6796	-0.541035	0.433572	-1.24786	0.212083	0.999499
6530403H02Rik	16.6748	-0.145066	0.574899	-0.252333	0.800784	0.999499
6720427I07Rik	74.5639	-0.0911899	0.247083	-0.369066	0.712078	0.999499
6820408C15Rik	12.9036	0.285455	0.37921	0.752763	0.451592	0.999499
8030462N17Rik	17.2391	0.694448	0.495413	1.40176	0.160988	0.999499
8430408G22Rik	16.4998	0.378494	0.442395	0.855555	0.392244	0.999499
8430419L09Rik	108.924	-0.116202	0.196228	-0.592178	0.553732	0.999499
8430429K09Rik	39.0138	-0.0120699	0.215915	-0.0559012	0.955421	0.999499
9030617O03Rik	15.3827	-0.29378	0.291668	-1.00724	0.313818	0.999499
9030624J02Rik	112.878	0.0988499	0.214642	0.460534	0.645133	0.999499
9130020K20Rik	100.4	-0.0970879	0.147501	-0.65822	0.510397	0.999499
9130221H12Rik	23.6205	0.1515	0.230654	0.656827	0.511292	0.999499
9130401M01Rik	78.3524	-0.415495	0.207775	-1.99973	0.0455291	0.999499
9230114K14Rik	30.6884	0.0195319	0.229125	0.0852452	0.932066	0.999499
9330132A10Rik	25.956	-0.254216	0.280975	-0.904761	0.365592	0.999499
9330151L19Rik	34.0865	0.293544	0.207701	1.4133	0.157568	0.999499
9330159F19Rik	251.726	0.0511509	0.0893936	0.572198	0.567188	0.999499
9330159N05Rik	32.0749	0.17898	0.244209	0.732899	0.46362	0.999499
9330162012Rik	32.581	0.165755	0.279362	0.593335	0.552957	0.999499
9330182L06Rik	78.6834	-0.115648	0.16983	-0.680964	0.495895	0.999499
9430015G10Rik	27.3255	-0.1896	0.275516	-0.688162	0.491351	0.999499
9430016H08Rik	55.5897	0.106936	0.159844	0.668999	0.503496	0.999499
9430020K01Rik	105.921	-0.0307708	0.161303	-0.190765	0.84871	0.999499
9530059O14Rik	134.515	0.12532	0.152453	0.822027	0.411062	0.999499
9530068E07Rik	103.782	0.206799	0.328095	0.6303	0.528498	0.999499
9630033F20Rik	57.1427	-0.0631631	0.176826	-0.357206	0.720938	0.999499
9930021J03Rik	343.601	-0.178645	0.106783	-1.67297	0.0943333	0.999499
9930104L06Rik	23.5885	-0.203409	0.278488	-0.730405	0.465143	0.999499
A130010J15Rik	19.1882	-0.124133	0.287979	-0.431048	0.666434	0.999499
A130014A01Rik	28.9532	-0.158318	0.250641	-0.631651	0.527615	0.999499
A230046K03Rik	163.58	0.0546224	0.14398	0.379376	0.704409	0.999499
A230050P20Rik	70.2187	0.0371831	0.171988	0.216196	0.828835	0.999499
A2m	49.0505	0.373806	0.373819	0.999963	0.317328	0.999499
A330008L17Rik	21.7981	0.148009	0.283851	0.521433	0.602065	0.999499
A330017A19Rik	56.106	0.327479	0.214075	1.52974	0.126081	0.999499
A330023F24Rik	329.171	-0.0511773	0.177786	-0.287859	0.773455	0.999499
A330050F15Rik	92.8214	0.0675836	0.164472	0.410913	0.681137	0.999499
A330102I10Rik	35.3086	-0.20746	0.416622	-0.497959	0.618513	0.999499
A430005L14Rik	50.3117	0.010369	0.268383	0.0386349	0.969181	0.999499
A430033K04Rik	42.0775	-0.133819	0.154618	-0.865481	0.386775	0.999499
A430046D13Rik	28.1206	-0.176111	0.193831	-0.908578	0.363573	0.999499
A430105I19Rik	24.8471	0.0883826	0.238653	0.37034	0.711129	0.999499
A430106G13Rik	25.1056	0.432444	0.374892	1.15352	0.248698	0.999499
A530054K11Rik	23.6325	-0.116339	0.3326	-0.349787	0.726498	0.999499
A530058N18Rik	36.9797	0.332778	0.321355	1.03555	0.300414	0.999499
A630072M18Rik	22.969	0.229079	0.297575	0.76982	0.441407	0.999499
A730017C20Rik	117.879	0.109677	0.253626	0.432435	0.665425	0.999499
A730017L22Rik	28.7714	-0.193618	0.280668	-0.689848	0.49029	0.999499
A730060N03Rik	19.378	0.316101	0.411906	0.76741	0.442838	0.999499
A830010M20Rik	248.976	-0.0151085	0.107628	-0.140377	0.888362	0.999499
A830018L16Rik	26.772	0.0236588	0.326243	0.072519	0.942189	0.999499
A830039N20Rik	165.409	-0.184843	0.191078	-0.967368	0.33336	0.999499
A830073O21Rik	13.707	0.710075	0.619665	1.1459	0.251835	0.999499
A830080D01Rik	52.4838	-0.0860007	0.195726	-0.439393	0.660377	0.999499
A830082K12Rik	62.7827	-0.128234	0.266258	-0.481614	0.63008	0.999499
A930005H10Rik	42.5484	0.201658	0.21864	0.922328	0.356357	0.999499
A930011G23Rik	38.0461	-0.273394	0.27079	-1.00962	0.312679	0.999499
A930011O12Rik	575.597	0.0383268	0.186693	0.205293	0.837343	0.999499
A930017K11Rik	14.1723	-0.200078	0.371561	-0.538479	0.590246	0.999499
A930024E05Rik	41.0878	0.0877275	0.235249	0.372914	0.709213	0.999499
AA415398	13.935	0.0959339	0.268042	0.357906	0.720414	0.999499
AA465934	135.368	0.0904951	0.451075	0.200621	0.840995	0.999499
AA987161	24.4056	0.127025	0.300493	0.422721	0.672499	0.999499
AC161246,1	12.9215	0.305401	0.292711	1.04335	0.296784	0.999499
AF529169	75.18	0.111298	0.15475	0.719213	0.47201	0.999499
AI118078	44.9569	0.523144	0.306719	1.70562	0.0880797	0.999499
AI314180	251.764	0.0746721	0.144057	0.51835	0.604214	0.999499
AI413582	98.2579	-0.229262	0.203363	-1.12736	0.259591	0.999499
AI464131	31.3721	0.302365	0.228686	1.32218	0.186108	0.999499
AI480526	102.051	0.0352761	0.196798	0.17925	0.857741	0.999499
AI504432	47.6336	0.200182	0.294984	0.67862	0.497379	0.999499
AI593442	110.973	-0.179814	0.22081	-0.814336	0.415452	0.999499
AI597479	50.199	0.031773	0.174569	0.182008	0.855576	0.999499
AI606181	14.1673	0.0820849	0.283312	0.289734	0.77202	0.999499
AI837181	195.69	0.304774	0.194847	1.56417	0.117777	0.999499
AI846148	19.5098	0.580936	0.268615	2.16271	0.0305634	0.999499
AI854517	39.1394	-0.154145	0.211874	-0.727533	0.466899	0.999499
AI854703	27.2112	-0.16742	0.193887	-0.863491	0.387868	0.999499
AI987944	62.1687	0.0971622	0.198963	0.488344	0.625306	0.999499
AK010878	26.0454	-0.149854	0.273461	-0.54799	0.583699	0.999499
AK129341	111.9	0.0461094	0.179709	0.256577	0.797505	0.999499
AK157302	47.2858	0.0826365	0.202498	0.408086	0.68321	0.999499
AU019823	78.8593	-0.200845	0.221672	-0.906044	0.364913	0.999499
AU022252	58.8317	0.215934	0.191094	1.12999	0.258482	0.999499
AU040320	113.896	0.113144	0.134215	0.843005	0.399226	0.999499
AU041133	21.137	-0.268368	0.31381	-0.855194	0.392444	0.999499
AW047730	25.0482	0.0243553	0.382856	0.0636147	0.949277	0.999499
AW146154	13.793	0.386808	0.303382	1.27499	0.202314	0.999499
AW209491	48.0357	-0.0606242	0.212693	-0.285032	0.77562	0.999499
AW549877	65.8714	0.0181234	0.239965	0.0755249	0.939797	0.999499
AW551984	26.0813	0.215265	0.310678	0.692888	0.48838	0.999499
AW554918	67.3016	-0.183636	0.149789	-1.22597	0.220211	0.999499
Aaas	25.7147	-0.137477	0.249537	-0.550929	0.581683	0.999499
Aacs	29.2454	0.021076	0.279985	0.0752755	0.939996	0.999499
Aagab	115.321	0.125849	0.173787	0.72416	0.468968	0.999499
Aak1	261.019	-0.167795	0.213648	-0.785381	0.43223	0.999499
Aamdc	62.041	0.101675	0.172805	0.588379	0.556278	0.999499
Aamp	416.872	-0.0553098	0.151098	-0.366052	0.714326	0.999499
Aar2	41.0046	0.118249	0.225729	0.523852	0.600381	0.999499
Aard	15.5136	0.101119	0.369376	0.273757	0.784271	0.999499
Aars	266.208	-0.0206907	0.129739	-0.159479	0.873292	0.999499
Aars2	24.1624	-0.277398	0.388166	-0.714639	0.474832	0.999499
Aasdh	14.2962	-0.236477	0.295009	-0.801592	0.422789	0.999499
Aasdhppt	38.8609	-0.0597388	0.223797	-0.266933	0.789521	0.999499
Aatf	33.9266	-0.0279421	0.256052	-0.109127	0.913102	0.999499
Aatk	749.722	0.115754	0.112919	1.0251	0.305314	0.999499
Abat	398.118	-0.142048	0.119446	-1.18922	0.234353	0.999499
Abca1	67.7353	0.146052	0.21625	0.675387	0.49943	0.999499
Abca2	714.186	-0.092578	0.148487	-0.623475	0.532972	0.999499
Abca3	84.2915	-0.0283489	0.137786	-0.205746	0.836989	0.999499
Abca5	135.575	0.127391	0.141745	0.898739	0.368792	0.999499
Abca7	57.0641	0.33523	0.178871	1.87415	0.0609101	0.999499
Abca8a	43.1783	0.463707	0.261688	1.77199	0.0763964	0.999499
Abca8b	44.3389	0.0534944	0.181101	0.295384	0.7677	0.999499
Abca9	16.084	-0.0301405	0.346588	-0.0869634	0.930701	0.999499
Abcb10	58.3825	-0.363217	0.198847	-1.82662	0.067757	0.999499
Abcb1a	98.1864	-0.0484929	0.129395	-0.374766	0.707835	0.999499
Abcb7	48.9491	-0.252502	0.224135	-1.12656	0.259927	0.999499
Abcb8	47.1924	0.0956183	0.216943	0.440754	0.659391	0.999499
Abcb9	80.6544	0.378556	0.255037	1.48432	0.137725	0.999499
Abcc1	51.4879	-0.0284205	0.20439	-0.13905	0.88941	0.999499
Abcc4	17.7266	-0.0399285	0.276791	-0.144255	0.885299	0.999499
Abcc5	260.519	-0.0416419	0.124151	-0.335414	0.737313	0.999499
Abcc8	53.2274	-0.138376	0.19982	-0.692505	0.488621	0.999499
Abcc9	13.5493	0.0203614	0.345264	0.0589734	0.952973	0.999499
Abcd1	39.0619	0.172258	0.304024	0.566594	0.57099	0.999499
Abcd2	107.675	-0.0054152	0.183757	-0.0294694	0.97649	0.999499
Abcd3	162.496	0.0737365	0.140605	0.524425	0.599983	0.999499
Abce1	85.5146	0.15211	0.21727	0.700097	0.483867	0.999499
Abcf1	205.421	0.139078	0.170029	0.817966	0.413376	0.999499
Abcf2	63.4542	0.042546	0.290232	0.146593	0.883453	0.999499
Abcf3	56.9178	-0.16201	0.196673	-0.823752	0.410081	0.999499
Abcg1	87.8782	0.347422	0.291746	1.19084	0.233717	0.999499
Abcg2	52.2497	0.0860766	0.19167	0.449087	0.653369	0.999499
Abcg4	76.834	-0.146864	0.193837	-0.757668	0.44865	0.999499
Abhd1	29.4757	0.128135	0.312945	0.409449	0.68221	0.999499
Abhd10	49.575	0.11844	0.180546	0.656012	0.511816	0.999499
Abhd11	43.9285	0.0946726	0.210593	0.449552	0.653034	0.999499
Abhd11os	15.632	-0.336372	0.325642	-1.03295	0.301626	0.999499
Abhd12	289.884	-0.121584	0.125982	-0.965091	0.334499	0.999499
Abhd13	62.4302	-0.292511	0.198858	-1.47096	0.141303	0.999499
Abhd14a	34.213	-0.160354	0.289852	-0.553227	0.580108	0.999499
Abhd14b	39.376	-0.250914	0.216879	-1.15693	0.2473	0.999499
Abhd16a	293.024	-0.0294998	0.200688	-0.146993	0.883137	0.999499
Abhd17a	107.536	-0.228014	0.134518	-1.69504	0.0900677	0.999499
Abhd17b	272.801	-0.0547942	0.112005	-0.489211	0.624693	0.999499
Abhd17c	86.7164	0.460918	0.323495	1.42481	0.154214	0.999499
Abhd2	97.2591	-0.331084	0.315354	-1.04988	0.293772	0.999499
Abhd3	83.318	0.0416104	0.281326	0.147908	0.882415	0.999499
Abhd4	98.9921	-0.0591813	0.198882	-0.29757	0.766031	0.999499
Abhd5	33.2911	-0.116726	0.2113	-0.552419	0.580661	0.999499
Abhd6	152.097	0.0235423	0.164472	0.143139	0.886181	0.999499
Abhd8	186.95	-0.0994574	0.227145	-0.43786	0.661488	0.999499
Abi1	105.295	-0.071851	0.155531	-0.461973	0.6441	0.999499
Abi2	400.433	0.104971	0.128421	0.817396	0.413702	0.999499
Abi3bp	40.574	0.246295	0.249901	0.985572	0.324343	0.999499
Abl1	57.6821	0.246848	0.201328	1.2261	0.220161	0.999499
Abl2	136.568	-0.26264	0.117544	-2.2344	0.0254571	0.999499
Ablim1	545.023	-0.0914739	0.151448	-0.603996	0.545846	0.999499
Ablim2	165.197	-0.0340461	0.146246	-0.232801	0.815916	0.999499
Ablim3	130.844	-0.069123	0.169385	-0.408082	0.683213	0.999499
Abr	210.761	0.248868	0.21195	1.17418	0.240324	0.999499
Abt1	30.5487	-0.250408	0.285934	-0.875755	0.381163	0.999499
Abtb1	39.4131	0.151195	0.248457	0.608537	0.542832	0.999499
Abtb2	36.936	0.0820035	0.226753	0.361642	0.717619	0.999499
Acaa1a	65.4801	0.340074	0.237073	1.43447	0.151439	0.999499
Acaa2	51.9659	0.155152	0.170003	0.912641	0.361431	0.999499
Acaca	105.892	0.252188	0.137865	1.82924	0.0673633	0.999499
Acad11	29.545	0.319819	0.294548	1.0858	0.277569	0.999499
Acad8	44.3458	-0.020995	0.233986	-0.0897275	0.928504	0.999499
Acad9	43.713	-0.194953	0.209298	-0.931463	0.351614	0.999499
Acadl	108.705	-0.120332	0.141699	-0.849209	0.395765	0.999499
Acadm	75.4208	0.0745541	0.177478	0.420076	0.67443	0.999499
Acads	25.3459	0.236494	0.285343	0.828807	0.407214	0.999499
Acadsb	168.95	0.0821564	0.103649	0.792644	0.427985	0.999499
Acadvl	94.5277	-0.132874	0.124771	-1.06494	0.286903	0.999499
Acan	13.7433	-0.428212	0.33889	-1.26357	0.206384	0.999499
Acap2	103.849	0.0368233	0.226412	0.162638	0.870803	0.999499
Acap3	81.6101	0.0647665	0.206052	0.314321	0.753277	0.999499
Acat1	183.163	-0.12727	0.232144	-0.548238	0.583528	0.999499
Acat2	78.0424	-0.163717	0.184074	-0.88941	0.373783	0.999499
Acbd3	267.849	0.0828297	0.0947405	0.87428	0.381966	0.999499
Acbd4	93.6991	-0.21049	0.1612	-1.30577	0.191632	0.999499
Acbd5	198.509	-0.0660108	0.11983	-0.550871	0.581722	0.999499
Acbd6	109.136	-0.0494852	0.114227	-0.433217	0.664857	0.999499
Accs	15.114	0.0771858	0.424135	0.181984	0.855595	0.999499
Acd	81.6305	0.0480508	0.128849	0.372923	0.709206	0.999499
Ace	25.0741	-0.076038	0.393236	-0.193365	0.846673	0.999499
Acer2	14.2777	-0.0270426	0.345042	-0.0783748	0.93753	0.999499
Acer3	39.6967	0.559513	0.284633	1.96574	0.0493289	0.999499
Ache	84.5699	0.420587	0.245938	1.71014	0.0872408	0.999499
Acin1	544.86	0.0236555	0.0776688	0.304569	0.760695	0.999499
Ackr1	160.178	-0.105091	0.132656	-0.792202	0.428243	0.999499
Acly	202.839	0.0737318	0.109261	0.674821	0.49979	0.999499
Acn9	36.8171	-0.136614	0.21823	-0.62601	0.531308	0.999499
Aco1	40.5434	0.205406	0.29763	0.69014	0.490106	0.999499
Aco2	671.516	-0.119417	0.20296	-0.588376	0.55628	0.999499
Acot1	18.844	0.234879	0.259943	0.903578	0.366219	0.999499
Acot11	46.8261	0.184313	0.252128	0.731028	0.464762	0.999499
Acot13	344.229	0.0290376	0.142243	0.20414	0.838244	0.999499
Acot2	51.6791	0.220462	0.364202	0.605329	0.54496	0.999499
Acot6	21.2771	0.134982	0.246538	0.547512	0.584027	0.999499
Acot7	725.805	0.122631	0.114282	1.07305	0.283247	0.999499
Acot8	40.4659	0.0147863	0.340118	0.043474	0.965324	0.999499
Acot9	23.4132	-0.027512	0.221032	-0.124471	0.900943	0.999499
Acox1	90.1833	0.0579601	0.189354	0.306095	0.759533	0.999499
Acox3	67.1625	-0.304931	0.193216	-1.57819	0.114522	0.999499
Acp1	41.9659	-0.372069	0.58711	-0.63373	0.526257	0.999499
Acp2	117.229	-0.124361	0.120256	-1.03414	0.301072	0.999499
Acp6	20.2385	-0.127979	0.237926	-0.537896	0.590649	0.999499
Acrbp	48.2739	0.350259	0.205506	1.70437	0.0883114	0.999499
Acsbg1	329.902	-0.0982491	0.101487	-0.968098	0.332996	0.999499
Acsf3	18.0131	0.348137	0.353423	0.985042	0.324603	0.999499
Acsl1	99.639	-0.107859	0.124114	-0.869032	0.38483	0.999499
Acsl3	839.485	0.201311	0.113302	1.77676	0.0756069	0.999499
Acsl4	89.7773	0.0844	0.297696	0.28351	0.776786	0.999499
Acsl5	32.9336	0.179393	0.208516	0.860335	0.389605	0.999499
Acsl6	347.989	0.0406466	0.160915	0.252596	0.80058	0.999499
Acss1	26.8177	0.249361	0.300595	0.829557	0.406789	0.999499
Acss2	57.1374	-0.213347	0.209543	-1.01815	0.308606	0.999499
Acta2	23.1393	0.0972236	0.26937	0.36093	0.718152	0.999499
Actb	4114.51	0.245959	0.165549	1.48572	0.137353	0.999499
Actl6a	68.4682	-0.0331566	0.155275	-0.213535	0.83091	0.999499
Actl6b	167.847	0.113899	0.202817	0.561582	0.574401	0.999499
Actn1	109.564	0.306894	0.204601	1.49996	0.133624	0.999499
Actn4	203.291	-0.00326694	0.19826	-0.0164781	0.986853	0.999499
Actr10	281.583	-0.0385525	0.105017	-0.367109	0.713538	0.999499
Actr1a	183.872	-0.0234313	0.171609	-0.136539	0.891395	0.999499
Actr1b	330.465	-0.135295	0.104813	-1.29083	0.196763	0.999499
Actr2	203.511	-0.0641965	0.177627	-0.361411	0.717792	0.999499
Actr3	84.513	0.0484835	0.154956	0.312887	0.754367	0.999499
Actr5	25.7971	0.0606838	0.260806	0.232678	0.816012	0.999499
Actr6	54.222	0.23142	0.167031	1.38549	0.165902	0.999499
Actr8	121.617	-0.134495	0.140027	-0.960499	0.336804	0.999499
Acvr1	53.2197	0.205421	0.349948	0.587005	0.5572	0.999499
Acvr1b	64.5883	-0.0504253	0.29985	-0.168168	0.866451	0.999499
Acvr1c	54.8282	0.244934	0.256404	0.955266	0.339443	0.999499
Acvr2a	34.556	0.448333	0.259754	1.72599	0.0843496	0.999499
Acvr2b	24.4834	-0.0265982	0.221262	-0.120211	0.904316	0.999499
Acvrl1	27.4265	0.518316	0.282654	1.83375	0.0666911	0.999499
Acy1	15.6087	-0.744828	0.456652	-1.63106	0.102877	0.999499
Acyp1	53.7553	0.0531158	0.24339	0.218233	0.827248	0.999499
Acyp2	18.9487	-0.326394	0.41508	-0.786341	0.431668	0.999499
Adal	45.4096	-0.00651898	0.175733	-0.037096	0.970408	0.999499
Adam10	171.191	-0.113602	0.140607	-0.807937	0.419127	0.999499
Adam11	311.312	0.0435968	0.152792	0.285334	0.775388	0.999499
Adam15	207.612	0.794895	0.342345	2.32191	0.0202376	0.999499
Adam17	58.6127	0.211946	0.18436	1.14963	0.250295	0.999499
Adam19	33.7762	-0.0528093	0.211004	-0.250276	0.802374	0.999499
Adam22	324.249	-0.144324	0.194583	-0.741711	0.458262	0.999499
Adam23	339.713	0.155364	0.115336	1.34705	0.177963	0.999499
Adamts1	76.99	0.304116	0.262176	1.15997	0.246061	0.999499
Adamts10	121.158	-0.164864	0.24581	-0.670696	0.502414	0.999499
Adamts15	17.7704	0.444167	0.291074	1.52596	0.12702	0.999499
Adamts18	17.9745	0.00510452	0.280547	0.0181949	0.985483	0.999499
Adamts2	19.5714	-0.237197	0.250703	-0.946129	0.344083	0.999499
Adamts20	16.3091	0.149796	0.293602	0.510202	0.60991	0.999499
Adamts3	22.4547	0.0952533	0.328076	0.290339	0.771557	0.999499
Adamts4	69.9762	-0.0771109	0.203438	-0.379038	0.70466	0.999499
Adamts5	19.2581	0.416066	0.304484	1.36646	0.171794	0.999499
Adamtsl1	33.7349	0.424849	0.283457	1.49881	0.133922	0.999499
Adamtsl4	30.665	0.308434	0.21877	1.40986	0.158582	0.999499
Adap1	134.239	0.349917	0.298978	1.17038	0.24185	0.999499
Adap2	21.1422	-0.558545	0.364509	-1.53232	0.125444	0.999499
Adar	157.07	0.0208819	0.132208	0.157947	0.874498	0.999499
Adarb1	332.134	-0.00306909	0.105213	-0.0291702	0.976729	0.999499
Adarb2	25.0156	0.157858	0.306972	0.514242	0.607083	0.999499
Adat1	15.9427	-0.118356	0.287858	-0.411163	0.680953	0.999499
Adck1	34.7948	0.164423	0.226226	0.726808	0.467343	0.999499
Adck2	60.1803	-0.0273324	0.200553	-0.136285	0.891596	0.999499
Adck3	24.0899	-0.430189	0.287596	-1.49581	0.134702	0.999499
Adck4	25.8463	0.131458	0.267945	0.490615	0.623699	0.999499
Adck5	24.6706	0.0754195	0.232929	0.323788	0.746099	0.999499
Adcy1	1594.79	0.0837873	0.225903	0.370899	0.710713	0.999499
Adcy2	59.7557	0.188726	0.20226	0.93309	0.350773	0.999499
Adcy3	37.6842	0.151558	0.211294	0.717285	0.473198	0.999499
Adcy5	60.6532	0.131806	0.229779	0.573619	0.566225	0.999499
Adcy6	42.3858	-0.0165385	0.331619	-0.0498719	0.960224	0.999499
Adcy7	13.0172	0.466513	0.363605	1.28302	0.199485	0.999499
Adcy9	105.557	0.204061	0.175197	1.16475	0.24412	0.999499
Adcyap1	22.1882	0.244671	0.33889	0.721978	0.470308	0.999499
Adcyap1r1	394.125	0.251621	0.177355	1.41874	0.155976	0.999499
Add1	314.253	-0.106118	0.106642	-0.995083	0.319696	0.999499
Add2	80.7014	0.224499	0.223989	1.00228	0.316211	0.999499
Add3	516.342	0.101683	0.111553	0.911517	0.362023	0.999499
Adh5	80.1043	-0.0864757	0.182526	-0.473772	0.635663	0.999499
Adi1	32.6009	0.177343	0.219687	0.807254	0.41952	0.999499
Adipor1	88.8451	0.19513	0.183084	1.06579	0.286516	0.999499
Adipor2	163.013	-0.0426438	0.133522	-0.319377	0.74944	0.999499
Adk	114.448	-0.0970391	0.153606	-0.631742	0.527555	0.999499
Adnp2	14.3098	0.17617	0.377432	0.466759	0.640673	0.999499
Ado	98.1952	-0.144477	0.194677	-0.742139	0.458003	0.999499
Adora1	538.38	-0.295863	0.123418	-2.39725	0.0165185	0.999499
Adpgk	14.6441	0.0833854	0.438378	0.190213	0.849142	0.999499
Adprh	160.666	-0.00447555	0.110469	-0.0405139	0.967683	0.999499
Adprhl2	28.6531	0.116397	0.22871	0.50893	0.610801	0.999499
Adprm	20.6831	0.124953	0.25428	0.4914	0.623143	0.999499
Adra1a	16.9632	-0.42271	0.278751	-1.51644	0.129407	0.999499
Adra1b	30.9495	-0.377511	0.320835	-1.17665	0.239335	0.999499
Adra2a	39.721	-0.172638	0.214475	-0.804933	0.420858	0.999499
Adra2c	24.3535	0.290541	0.359198	0.80886	0.418596	0.999499
Adrb1	34.1714	0.0593501	0.217859	0.272424	0.785296	0.999499
Adrbk1	260.824	0.0255158	0.124234	0.205386	0.837271	0.999499
Adrbk2	155.968	0.228076	0.158297	1.44082	0.149637	0.999499
Adrm1	153.77	0.194132	0.198165	0.979649	0.327259	0.999499
Adsl	29.4565	-0.0970946	0.279609	-0.347251	0.728403	0.999499
Adss	136.581	0.143207	0.133696	1.07114	0.284108	0.999499
Adssl1	32.1704	-0.104177	0.249559	-0.417445	0.676353	0.999499
Aebp1	31.4892	-0.154672	0.24013	-0.644118	0.519499	0.999499
Aebp2	120.253	0.0921964	0.179135	0.514676	0.606779	0.999499
Aen	26.2961	-0.0929788	0.228412	-0.407067	0.683959	0.999499
Aes	821.647	-0.0180706	0.158325	-0.114136	0.90913	0.999499
Afap1	75.4531	0.293522	0.208502	1.40776	0.159201	0.999499
Afap1l1	19.7243	0.187741	0.267637	0.701475	0.483007	0.999499
Afap1l2	71.7878	0.605265	0.333244	1.81628	0.0693273	0.999499
Aff1	67.2091	-0.0154912	0.211213	-0.0733437	0.941533	0.999499
Aff2	18.3365	-0.306427	0.364394	-0.84092	0.400393	0.999499
Aff3	80.1455	0.0614141	0.200343	0.306545	0.759189	0.999499
Aff4	368.704	0.0111123	0.152463	0.0728853	0.941897	0.999499
Afg3l1	113.066	-0.110425	0.114603	-0.963543	0.335275	0.999499
Afg3l2	83.7547	0.120775	0.208818	0.578374	0.563011	0.999499
Aftph	313.063	-0.153696	0.164679	-0.933304	0.350663	0.999499
Aga	26.1751	-0.0174112	0.234741	-0.0741721	0.940873	0.999499
Agap1	829.315	0.0891864	0.0948312	0.940476	0.346974	0.999499
Agap2	157.977	0.30764	0.183377	1.67763	0.0934185	0.999499
Agap3	199.137	0.301256	0.280862	1.07261	0.283445	0.999499
Agbl2	20.1437	0.0290843	0.331258	0.0877997	0.930036	0.999499
Agbl3	19.6405	0.0737444	0.351216	0.209969	0.833692	0.999499
Agfg1	256.449	0.0282922	0.147118	0.19231	0.8475	0.999499
Agfg2	177.08	0.400408	0.153703	2.60508	0.00918528	0.999499
Aggf1	211.307	-0.0243561	0.131231	-0.185597	0.85276	0.999499
Agl	147.651	-0.0952386	0.125314	-0.76	0.447255	0.999499
Ago1	85.7631	0.10288	0.139233	0.738905	0.459965	0.999499
Ago2	328.219	0.154606	0.0878184	1.76052	0.0783204	0.999499
Ago3	218.339	-0.0859419	0.127309	-0.675067	0.499633	0.999499
Ago4	29.246	-0.313185	0.283184	-1.10594	0.268753	0.999499
Agpat1	139.955	-0.0277297	0.146405	-0.189404	0.849776	0.999499
Agpat3	293.806	0.00301361	0.0907713	0.0332	0.973515	0.999499
Agpat4	123.628	-0.0404352	0.176384	-0.229245	0.818679	0.999499
Agpat5	218.145	0.138327	0.112273	1.23205	0.217929	0.999499
Agpat6	167.171	-0.072857	0.176533	-0.412711	0.679818	0.999499
Agpat9	20.0918	0.297519	0.390848	0.761213	0.44653	0.999499
Agps	50.8556	-0.132848	0.194768	-0.682086	0.495185	0.999499
Agrn	139.534	-0.188192	0.170211	-1.10564	0.268882	0.999499
Agt	132.778	-0.158909	0.162617	-0.977194	0.328473	0.999499
Agtpbp1	850.837	-0.142234	0.111599	-1.27451	0.202481	0.999499
Agtrap	29.3981	0.141713	0.274566	0.516134	0.605761	0.999499
Ahctf1	79.8546	-0.118194	0.160579	-0.736052	0.461699	0.999499
Ahcyl1	802.579	-0.0668865	0.117276	-0.570333	0.568452	0.999499
Ahcyl2	233.712	0.0348695	0.120237	0.290005	0.771812	0.999499
Ahdc1	213.749	0.0404811	0.146239	0.276815	0.781922	0.999499
Ahi1	1285.12	0.214178	0.162245	1.32009	0.186805	0.999499
Ahnak2	29.0221	-0.586649	0.384304	-1.52652	0.12688	0.999499
Ahsa1	42.4497	0.174018	0.246328	0.706446	0.479911	0.999499
Ahsa2	47.8533	0.0394586	0.205982	0.191564	0.848084	0.999499
Aida	64.3282	-0.146352	0.162688	-0.899584	0.368341	0.999499
Aif1l	29.7958	0.38817	0.310691	1.24938	0.211527	0.999499
Aifm1	99.1232	-0.00697994	0.126092	-0.0553558	0.955855	0.999499
Aifm3	329.44	-0.246209	0.109105	-2.25663	0.0240314	0.999499
Aig1	293.204	-0.193733	0.119839	-1.61661	0.105963	0.999499
Aimp1	271.133	-0.160784	0.103549	-1.55273	0.120487	0.999499
Aimp2	67.1124	0.0712041	0.161352	0.441297	0.658998	0.999499
Aip	120.458	0.25068	0.24432	1.02603	0.304876	0.999499
Airn	59.3783	0.146252	0.232798	0.628239	0.529848	0.999499
Ajap1	125.69	0.145525	0.127702	1.13957	0.254464	0.999499
Ak1	128.418	0.0674462	0.133722	0.504376	0.613997	0.999499
Ak2	74.6126	0.189475	0.16129	1.17474	0.240098	0.999499
Ak3	121.658	0.149537	0.131202	1.13975	0.254392	0.999499
Ak4	121.282	0.0615373	0.198281	0.310353	0.756292	0.999499
Ak6	136.536	0.440149	0.169508	2.59662	0.00941454	0.999499
Akap1	39.2983	0.124316	0.217567	0.571393	0.567733	0.999499
Akap10	42.9073	-0.103786	0.227128	-0.456951	0.647707	0.999499
Akap11	526.954	-0.0160756	0.0880942	-0.182482	0.855204	0.999499
Akap12	355.973	0.00165364	0.10129	0.0163258	0.986975	0.999499
Akap13	73.04	0.247793	0.23079	1.07367	0.282971	0.999499
Akap17b	133.848	-0.0874113	0.127863	-0.683633	0.494207	0.999499
Akap5	14.4271	-0.0745299	0.267178	-0.278952	0.780282	0.999499
Akap6	416.872	0.0287136	0.145227	0.197715	0.843268	0.999499
Akap7	329.837	0.0639372	0.119461	0.535213	0.592503	0.999499
Akap8	174.017	0.0593907	0.133231	0.445772	0.655762	0.999499
Akap8l	332.959	0.480086	0.217591	2.20637	0.027358	0.999499
Akap9	1115.68	-0.0522183	0.124964	-0.417868	0.676044	0.999499
Akirin1	31.1498	0.10074	0.220663	0.456535	0.648005	0.999499
Akirin2	157.126	0.0710736	0.203176	0.349813	0.726479	0.999499
Akr1a1	351.133	-0.215594	0.13635	-1.58117	0.113838	0.999499
Akr1b10	60.491	0.225131	0.218916	1.02839	0.303768	0.999499
Akr1e1	24.2353	-0.0876775	0.324477	-0.270211	0.786998	0.999499
Akr7a5	88.4318	0.491054	0.292866	1.67672	0.0935979	0.999499
Akt1	271.627	-0.0410751	0.2274	-0.180629	0.856659	0.999499
Akt2	124.36	0.115218	0.193379	0.595816	0.551298	0.999499
Akt3	246.739	-0.0136067	0.126973	-0.107162	0.91466	0.999499
Aktip	237.807	-0.0816819	0.109307	-0.74727	0.454901	0.999499
Alad	117.908	0.167307	0.296814	0.563676	0.572975	0.999499
Alas1	78.9238	-0.0502812	0.2782	-0.180737	0.856574	0.999499
Alas2	23.7154	-0.314834	0.260512	-1.20852	0.226847	0.999499
Alcam	284.749	-0.163874	0.195501	-0.838225	0.401904	0.999499
Aldh18a1	13.7291	0.173522	0.42116	0.41201	0.680332	0.999499
Aldh1a1	292.658	0.0887143	0.123434	0.718719	0.472314	0.999499
Aldh1l1	43.9292	-0.0807364	0.186893	-0.431992	0.665747	0.999499
Aldh1l2	42.2178	0.285816	0.240894	1.18648	0.235433	0.999499
Aldh2	256.56	0.0300706	0.251253	0.119683	0.904735	0.999499
Aldh3a2	53.6982	0.0346101	0.267205	0.129526	0.896941	0.999499
Aldh4a1	33.0067	0.0385821	0.237436	0.162495	0.870916	0.999499
Aldh5a1	100.071	0.0569357	0.152189	0.374111	0.708322	0.999499
Aldh6a1	36.4673	-0.215579	0.301079	-0.716019	0.47398	0.999499
Aldh7a1	69.2161	-0.125371	0.195297	-0.641952	0.520904	0.999499
Aldh9a1	84.4775	-0.138697	0.161192	-0.860442	0.389546	0.999499
Aldoa	1869.44	0.041612	0.160077	0.259949	0.794903	0.999499
Aldoc	3713.87	0.0100442	0.112688	0.0891323	0.928977	0.999499
Alg1	86.285	-0.106849	0.155004	-0.689326	0.490618	0.999499
Alg11	214.536	0.132428	0.186729	0.709198	0.478201	0.999499
Alg14	15.5902	-0.139461	0.311217	-0.448117	0.654069	0.999499
Alg2	104.984	-0.0626346	0.153403	-0.4083	0.683053	0.999499
Alg3	19.7989	0.135075	0.309412	0.436555	0.662434	0.999499
Alg5	51.8844	-0.159908	0.181626	-0.880423	0.37863	0.999499
Alg6	57.8981	-0.0966231	0.195719	-0.493682	0.621531	0.999499
Alg8	28.0446	0.0500162	0.273836	0.18265	0.855073	0.999499
Alg9	20.8019	-0.0671935	0.336577	-0.199638	0.841764	0.999499
Alkbh1	40.3234	0.0734854	0.182173	0.403382	0.686668	0.999499
Alkbh3	19.1448	-0.357319	0.246303	-1.45073	0.146855	0.999499
Alkbh4	19.8593	-0.583376	0.265223	-2.19957	0.0278376	0.999499
Alkbh5	123.209	0.171252	0.250505	0.683629	0.494209	0.999499
Alkbh6	72.7813	-0.258929	0.179335	-1.44383	0.148787	0.999499
Alkbh7	73.805	-0.0470823	0.136035	-0.346105	0.729264	0.999499
Alkbh8	125.629	-0.121256	0.155691	-0.778828	0.436081	0.999499
Alms1	74.5939	-0.102399	0.203843	-0.502342	0.615427	0.999499
Aloxe3	24.5509	-0.0317824	0.282552	-0.112483	0.91044	0.999499
Als2	120.148	-0.040551	0.202941	-0.199817	0.841624	0.999499
Als2cl	18.4423	-0.0512631	0.350677	-0.146183	0.883777	0.999499
Alyref2	13.317	0.538233	0.288657	1.86461	0.0622362	0.999499
Ambra1	86.0443	-0.118861	0.146539	-0.811121	0.417296	0.999499
Amd1	102.524	-0.103028	0.184627	-0.558031	0.576823	0.999499
Amdhd2	19.4641	-0.673658	0.359611	-1.8733	0.0610276	0.999499
Amer1	46.4338	-0.323934	0.169163	-1.91493	0.0555019	0.999499
Amer2	233.049	0.133393	0.157564	0.846598	0.397219	0.999499
Amer3	50.2162	-0.101379	0.195849	-0.517641	0.604709	0.999499
Amfr	147.619	0.0979068	0.140419	0.697248	0.485648	0.999499
Amica1	34.1617	-0.0440027	0.328591	-0.133913	0.893471	0.999499
Amigo1	62.4805	0.412419	0.193131	2.13544	0.0327254	0.999499
Amigo2	49.8431	0.197417	0.283025	0.697527	0.485473	0.999499
Ammecr1	19.9168	-0.233035	0.278372	-0.837137	0.402516	0.999499
Ammecr1l	151.814	-0.0828884	0.126659	-0.654423	0.51284	0.999499
Amn1	17.2875	0.364146	0.33305	1.09337	0.274233	0.999499
Amot	92.9227	-0.0835921	0.180389	-0.463399	0.643078	0.999499
Amotl1	257.549	-0.12729	0.182419	-0.697789	0.485309	0.999499
Amotl2	50.6067	0.0762616	0.211573	0.36045	0.718511	0.999499
Ampd2	74.4296	-0.102704	0.23274	-0.441283	0.659008	0.999499
Ampd3	32.1026	0.0347587	0.238885	0.145504	0.884313	0.999499
Amph	386.961	0.137428	0.11832	1.16149	0.245443	0.999499
Amt	51.098	0.193239	0.210797	0.916709	0.359295	0.999499
Amy1	37.2141	-0.365246	0.3075	-1.18779	0.234915	0.999499
Amz1	18.217	0.0919668	0.24514	0.375161	0.707541	0.999499
Amz2	99.4267	0.0730506	0.157067	0.465092	0.641866	0.999499
Anapc1	81.5622	-0.0942925	0.128934	-0.731322	0.464583	0.999499
Anapc10	24.5479	0.447325	0.244372	1.83051	0.0671732	0.999499
Anapc11	379.964	-0.0226253	0.150795	-0.150041	0.880733	0.999499
Anapc13	120.534	-0.255682	0.160584	-1.5922	0.11134	0.999499
Anapc15	17.2652	0.219922	0.239682	0.917558	0.358851	0.999499
Anapc16	103.581	-0.116029	0.16415	-0.70685	0.47966	0.999499
Anapc2	122.773	0.078713	0.187646	0.419476	0.674868	0.999499
Anapc4	159.166	-0.0993093	0.108434	-0.915852	0.359744	0.999499
Anapc5	250.274	0.365702	0.242805	1.50615	0.132028	0.999499
Anapc7	55.9009	0.184661	0.241115	0.765861	0.443759	0.999499
Angel2	141.994	0.0675195	0.113973	0.592414	0.553573	0.999499
Angpt1	45.2771	0.0998916	0.246766	0.404804	0.685622	0.999499
Angptl6	23.1323	0.277227	0.309747	0.89501	0.370782	0.999499
Ank	356.387	-0.072572	0.096992	-0.748226	0.454324	0.999499
Ank1	627.105	0.165803	0.131482	1.26103	0.207297	0.999499
Ank2	1955.74	-0.0324954	0.138914	-0.233924	0.815044	0.999499
Ank3	2105.65	0.0113381	0.0857515	0.132221	0.89481	0.999499
Ankfy1	85.3409	-0.104303	0.166265	-0.627334	0.53044	0.999499
Ankhd1	860.818	-0.302719	0.145857	-2.07545	0.0379444	0.999499
Ankib1	76.3295	0.0359432	0.175712	0.204558	0.837917	0.999499
Ankle2	61.0132	-0.114427	0.17385	-0.658191	0.510415	0.999499
Ankmy2	95.4802	0.0155208	0.190394	0.0815191	0.935029	0.999499
Ankra2	161.995	-0.109368	0.168915	-0.647475	0.517325	0.999499
Ankrd10	108.889	0.0747971	0.13317	0.561666	0.574343	0.999499
Ankrd11	1162.58	0.060665	0.0928862	0.653111	0.513685	0.999499
Ankrd12	1455.52	-0.154937	0.155447	-0.996723	0.318899	0.999499
Ankrd13a	110.368	0.134266	0.211262	0.63554	0.525076	0.999499
Ankrd13b	47.1005	-0.133732	0.181468	-0.736945	0.461156	0.999499
Ankrd13c	18.9037	-0.0718055	0.284894	-0.252043	0.801008	0.999499
Ankrd13d	40.8886	-0.240812	0.190071	-1.26696	0.205171	0.999499
Ankrd16	61.2926	-0.115699	0.16713	-0.692268	0.488769	0.999499
Ankrd17	422.77	-0.101481	0.103782	-0.977825	0.328161	0.999499
Ankrd24	110.86	-0.00994983	0.179729	-0.0553602	0.955852	0.999499
Ankrd26	164.517	-0.106679	0.105188	-1.01417	0.310502	0.999499
Ankrd27	65.7177	0.0249792	0.155516	0.160621	0.872392	0.999499
Ankrd28	38.837	-0.1543	0.236514	-0.652393	0.514148	0.999499
Ankrd29	45.177	0.164914	0.230833	0.714431	0.474961	0.999499
Ankrd32	94.0805	-0.107393	0.155064	-0.692571	0.488579	0.999499
Ankrd34a	81.5233	-0.111742	0.205692	-0.543252	0.586956	0.999499
Ankrd34b	102.794	-0.0114029	0.150281	-0.0758769	0.939517	0.999499
Ankrd35	20.3282	-0.155727	0.377481	-0.412543	0.679942	0.999499
Ankrd39	34.1461	-0.159454	0.203875	-0.782118	0.434145	0.999499
Ankrd40	334.449	0.110974	0.113323	0.979272	0.327446	0.999499
Ankrd44	63.3905	0.070884	0.159111	0.445501	0.655958	0.999499
Ankrd45	37.4703	-0.331383	0.241386	-1.37283	0.169804	0.999499
Ankrd46	188.638	-0.180444	0.130121	-1.38674	0.16552	0.999499
Ankrd49	36.507	-0.295984	0.229066	-1.29214	0.19631	0.999499
Ankrd50	71.8776	0.22514	0.162638	1.3843	0.166268	0.999499
Ankrd52	29.4936	0.0816521	0.359347	0.227224	0.82025	0.999499
Ankrd54	40.967	-0.0117974	0.186593	-0.0632253	0.949587	0.999499
Ankrd55	24.4127	0.985281	0.475806	2.07076	0.0383809	0.999499
Ankrd6	77.8867	0.176875	0.23124	0.764896	0.444334	0.999499
Ankrd9	38.085	0.182879	0.211218	0.865831	0.386583	0.999499
Anks1	67.5803	-0.130802	0.242394	-0.539624	0.589457	0.999499
Anks1b	921.924	0.0887227	0.120939	0.733615	0.463184	0.999499
Anks3	47.1033	-0.0777751	0.177505	-0.438157	0.661272	0.999499
Ankzf1	48.108	-0.248989	0.180189	-1.38182	0.167026	0.999499
Anln	86.8272	-0.0886734	0.23856	-0.371702	0.710114	0.999499
Ano10	24.7509	-0.132318	0.221137	-0.598354	0.549604	0.999499
Ano3	125.569	-0.0653925	0.195464	-0.33455	0.737964	0.999499
Ano4	33.2878	-0.0320724	0.263046	-0.121927	0.902957	0.999499
Ano6	71.6949	0.311114	0.173434	1.79385	0.0728372	0.999499
Ano8	104.318	-0.0550081	0.146032	-0.376687	0.706407	0.999499
Anp32a	810.636	-0.0828227	0.105135	-0.787775	0.430828	0.999499
Anp32b	130.924	-0.0400931	0.131073	-0.305884	0.759693	0.999499
Anp32e	309.046	-0.0370885	0.15944	-0.232618	0.816058	0.999499
Antxr1	19.4496	0.0960332	0.302507	0.317457	0.750897	0.999499
Anxa2	46.4893	0.224514	0.358082	0.62699	0.530666	0.999499
Anxa3	17.0716	-0.235064	0.296491	-0.792821	0.427882	0.999499
Anxa4	14.1582	0.181671	0.464784	0.390872	0.695892	0.999499
Anxa5	155.799	-0.128399	0.131532	-0.976184	0.328974	0.999499
Anxa6	311.811	0.168945	0.216325	0.780978	0.434815	0.999499
Anxa7	53.6825	-0.11224	0.213892	-0.524752	0.599755	0.999499
Aox1	18.1091	-0.324132	0.313699	-1.03326	0.301483	0.999499
Ap1ar	28.095	0.0673189	0.281599	0.23906	0.811059	0.999499
Ap1b1	319.587	0.15918	0.129768	1.22665	0.219953	0.999499
Ap1g1	299.17	-0.0960802	0.0983178	-0.977241	0.32845	0.999499
Ap1g2	16.0726	0.373325	0.252956	1.47585	0.139983	0.999499
Ap1m1	88.4659	0.172406	0.173759	0.992215	0.321093	0.999499
Ap1s2	393.308	0.116633	0.126192	0.924252	0.355355	0.999499
Ap2a1	54.9443	-0.254215	0.256002	-0.99302	0.3207	0.999499
Ap2a2	270.737	0.321721	0.139013	2.31433	0.0206497	0.999499
Ap2b1	549.922	-0.110072	0.125983	-0.873707	0.382278	0.999499
Ap2m1	139.441	0.0984785	0.25081	0.392642	0.694584	0.999499
Ap2s1	158.555	0.720774	0.457195	1.57651	0.114908	0.999499
Ap3b1	131.103	0.0690609	0.102302	0.675067	0.499633	0.999499
Ap3b2	363.398	-0.11176	0.130554	-0.856045	0.391973	0.999499
Ap3d1	390.683	0.0671209	0.14923	0.449781	0.652868	0.999499
Ap3m1	71.2958	-0.0593927	0.208934	-0.284266	0.776207	0.999499
Ap3m2	303.755	-0.0202615	0.117974	-0.171745	0.863638	0.999499
Ap3s2	127.76	-0.098951	0.196492	-0.503588	0.614551	0.999499
Ap4b1	22.2974	-0.376145	0.328978	-1.14337	0.252884	0.999499
Ap4e1	15.2946	-0.16765	0.315326	-0.53167	0.594954	0.999499
Ap4s1	106.169	0.0192896	0.147686	0.130612	0.896082	0.999499
Ap5m1	47.7658	0.0256337	0.235213	0.108981	0.913218	0.999499
Ap5s1	27.0126	0.0667174	0.204003	0.327042	0.743636	0.999499
Ap5z1	39.44	0.0668595	0.253099	0.264164	0.791654	0.999499
Apba1	479.082	-0.0223339	0.181977	-0.12273	0.902321	0.999499
Apba2	126.134	0.0941935	0.158162	0.595551	0.551475	0.999499
Apba3	34.2501	0.215404	0.442056	0.487278	0.626062	0.999499
Apbb1	387.361	0.374442	0.208707	1.7941	0.0727964	0.999499
Apbb1ip	20.0737	0.149695	0.315973	0.473759	0.635672	0.999499
Apbb2	220.495	-0.0747913	0.10077	-0.742197	0.457968	0.999499
Apc	719.289	-0.0930685	0.116488	-0.798956	0.424316	0.999499
Apc2	96.1343	0.289781	0.177374	1.63373	0.102317	0.999499
Apeh	44.9095	-0.0404666	0.204283	-0.198091	0.842974	0.999499
Apex1	43.25	-0.0457309	0.273871	-0.16698	0.867386	0.999499
Apex2	13.5077	-0.216909	0.302141	-0.717906	0.472815	0.999499
Aph1a	119.274	0.0551205	0.154471	0.356833	0.721217	0.999499
Aph1b	96.6733	0.234485	0.15426	1.52007	0.128494	0.999499
Api5	177.809	0.068673	0.24272	0.282931	0.77723	0.999499
Apip	40.4613	-0.0678548	0.26906	-0.252192	0.800892	0.999499
Apitd1	18.6221	0.0265808	0.254009	0.104645	0.916657	0.999499
Apln	56.2917	0.406156	0.194348	2.08983	0.0366328	0.999499
Aplp1	614.721	0.078198	0.115319	0.678103	0.497707	0.999499
Aplp2	1129.78	0.0582351	0.0863759	0.674206	0.50018	0.999499
Apmap	69.6962	-0.0576073	0.248942	-0.231409	0.816997	0.999499
Apoa1bp	190.972	0.146445	0.136404	1.07361	0.282997	0.999499
Apod	698.831	-0.149434	0.114753	-1.30222	0.19284	0.999499
Apoe	3470.71	-0.0131479	0.154666	-0.0850085	0.932255	0.999499
Apold1	22.4409	0.345565	0.370441	0.932849	0.350898	0.999499
Apoo	60.0959	-0.232944	0.202514	-1.15026	0.250036	0.999499
Apool	17.2713	0.74773	0.328583	2.27562	0.0228687	0.999499
Apopt1	38.7608	-0.0185015	0.230409	-0.0802988	0.936	0.999499
Appbp2	221.262	0.163916	0.135518	1.20955	0.22645	0.999499
Appl1	401	-0.0968632	0.104024	-0.931159	0.351771	0.999499
Appl2	374.008	-0.167804	0.128382	-1.30707	0.19119	0.999499
Aprt	48.3821	0.124583	0.250343	0.497647	0.618733	0.999499
Aptx	57.0743	-0.0297655	0.174859	-0.170226	0.864833	0.999499
Aqp1	14.1951	-0.255941	0.476733	-0.536865	0.591361	0.999499
Aqp4	461.779	-0.078432	0.184637	-0.42479	0.670989	0.999499
Aqp6	63.5071	-0.026078	0.33806	-0.0771401	0.938512	0.999499
Aqr	115.293	0.0244792	0.14969	0.163532	0.8701	0.999499
Ar	95.1305	0.201243	0.198343	1.01462	0.310287	0.999499
Araf	107.755	0.229278	0.282461	0.811714	0.416956	0.999499
Arap1	40.3881	0.308411	0.227788	1.35394	0.175755	0.999499
Arap2	391.099	0.0419311	0.0967329	0.433473	0.664671	0.999499
Arc	21.1802	-0.237173	0.340344	-0.696864	0.485888	0.999499
Arcn1	88.2624	0.197194	0.178065	1.10743	0.26811	0.999499
Arel1	76.8326	-0.225356	0.193691	-1.16348	0.244634	0.999499
Arf1	161.245	0.215664	0.134793	1.59997	0.109605	0.999499
Arf2	91.6178	0.104367	0.213192	0.489545	0.624456	0.999499
Arf3	256.033	0.177577	0.169806	1.04577	0.295668	0.999499
Arf4	143.138	0.156492	0.186915	0.837236	0.40246	0.999499
Arf5	407.329	0.455348	0.302973	1.50293	0.132857	0.999499
Arf6	203.599	0.0564687	0.140238	0.402663	0.687196	0.999499
Arfgap1	165.667	0.0827542	0.193327	0.428052	0.668613	0.999499
Arfgap2	23.5845	0.0444712	0.258249	0.172203	0.863278	0.999499
Arfgap3	36.5861	0.12175	0.214355	0.567984	0.570046	0.999499
Arfgef1	265.768	-0.135129	0.11786	-1.14652	0.251581	0.999499
Arfgef2	93.8541	-0.01319	0.171764	-0.076791	0.93879	0.999499
Arfip1	32.8298	-0.129058	0.22602	-0.571004	0.567997	0.999499
Arfip2	80.6059	-0.0906557	0.156657	-0.578688	0.562799	0.999499
Arfrp1	77.4153	-0.143043	0.163168	-0.876662	0.38067	0.999499
Arglu1	641.484	-0.0498065	0.071761	-0.694061	0.487644	0.999499
Arhgap1	49.8718	0.249652	0.195799	1.27504	0.202293	0.999499
Arhgap10	40.7241	-0.177584	0.193121	-0.919549	0.357808	0.999499
Arhgap12	163.966	0.115121	0.115841	0.993788	0.320326	0.999499
Arhgap17	26.6748	-0.208804	0.230748	-0.904899	0.365519	0.999499
Arhgap18	36.0344	0.331492	0.261263	1.2688	0.204511	0.999499
Arhgap20	203.948	0.0248324	0.158153	0.157015	0.875233	0.999499
Arhgap21	452.922	-0.132337	0.139618	-0.947853	0.343204	0.999499
Arhgap23	176.264	-0.247128	0.214346	-1.15294	0.248935	0.999499
Arhgap24	32.3718	0.356615	0.240856	1.48061	0.13871	0.999499
Arhgap26	358.081	0.172902	0.161353	1.07157	0.283912	0.999499
Arhgap27	25.3655	-0.143289	0.257518	-0.556423	0.577922	0.999499
Arhgap29	65.7508	-0.114966	0.158215	-0.726644	0.467444	0.999499
Arhgap31	69.9698	-0.118388	0.189858	-0.623561	0.532916	0.999499
Arhgap32	224.282	0.143717	0.124782	1.15174	0.249427	0.999499
Arhgap33	16.7556	0.316251	0.318554	0.992771	0.320822	0.999499
Arhgap35	157.631	0.0565359	0.138391	0.408524	0.682889	0.999499
Arhgap39	44.1454	0.184118	0.220175	0.836232	0.403024	0.999499
Arhgap42	22.7035	-0.146175	0.222967	-0.65559	0.512088	0.999499
Arhgap44	153.177	-0.0132669	0.0936836	-0.141614	0.887385	0.999499
Arhgap5	1177.51	0.0176444	0.127008	0.138923	0.889511	0.999499
Arhgdia	111.144	0.204522	0.139096	1.47036	0.141464	0.999499
Arhgef1	46.8871	0.457372	0.196005	2.33348	0.0196232	0.999499
Arhgef10	83.6186	0.236351	0.174237	1.35649	0.174943	0.999499
Arhgef10l	36.915	0.0416355	0.315758	0.131859	0.895096	0.999499
Arhgef11	48.375	0.184767	0.198463	0.930989	0.351859	0.999499
Arhgef12	418.299	0.137372	0.140286	0.979227	0.327468	0.999499
Arhgef15	36.2275	0.134294	0.206843	0.649254	0.516174	0.999499
Arhgef17	200.018	-0.125658	0.141455	-0.888324	0.374367	0.999499
Arhgef18	100.339	0.10617	0.12007	0.884236	0.376569	0.999499
Arhgef19	24.7415	-0.032536	0.225586	-0.144229	0.88532	0.999499
Arhgef2	178.356	0.140046	0.131917	1.06163	0.288405	0.999499
Arhgef25	165.348	0.027902	0.153932	0.181262	0.856162	0.999499
Arhgef26	127.714	-0.236284	0.137148	-1.72284	0.0849179	0.999499
Arhgef28	28.598	0.11506	0.307531	0.374141	0.708299	0.999499
Arhgef3	111.309	-0.266276	0.164631	-1.61742	0.105788	0.999499
Arhgef4	150.958	-0.25888	0.178903	-1.44704	0.147885	0.999499
Arhgef40	54.772	-0.131198	0.186628	-0.702988	0.482063	0.999499
Arhgef6	31.9111	0.213803	0.265483	0.805334	0.420627	0.999499
Arhgef7	457.268	0.0578104	0.133567	0.432819	0.665146	0.999499
Arhgef9	604.621	0.0186398	0.199854	0.0932672	0.925691	0.999499
Arid1a	273.612	0.249	0.142609	1.74603	0.0808054	0.999499
Arid2	114.096	-0.165574	0.181028	-0.914632	0.360385	0.999499
Arid3a	35.4321	0.0526162	0.24629	0.213635	0.830832	0.999499
Arid3b	28.6126	-0.186147	0.246218	-0.756025	0.449634	0.999499
Arid4a	500.605	-0.128569	0.107692	-1.19385	0.232536	0.999499
Arid4b	856.809	-0.205491	0.0968848	-2.12098	0.0339236	0.999499
Arid5b	110.33	-0.244731	0.150918	-1.62162	0.104886	0.999499
Arih1	244.698	0.0647627	0.119678	0.541144	0.588409	0.999499
Arih2	131.099	-0.132777	0.200878	-0.660982	0.508624	0.999499
Arl1	107.317	-0.157242	0.162134	-0.969826	0.332133	0.999499
Arl13b	37.8752	0.123094	0.219238	0.561464	0.574482	0.999499
Arl14ep	74.3314	0.1228	0.198673	0.618104	0.536507	0.999499
Arl16	50.0294	-0.142934	0.166009	-0.861001	0.389238	0.999499
Arl2	144.363	0.43135	0.29168	1.47885	0.139181	0.999499
Arl2bp	204.39	-0.15707	0.14506	-1.08279	0.278901	0.999499
Arl3	376.671	-0.0883683	0.11466	-0.770699	0.440885	0.999499
Arl4a	107.977	-0.153034	0.162903	-0.939417	0.347516	0.999499
Arl4c	228.482	0.138512	0.129687	1.06805	0.285499	0.999499
Arl5a	27.3421	0.53041	0.250106	2.12074	0.0339436	0.999499
Arl5b	99.9618	0.0971214	0.185729	0.522921	0.601029	0.999499
Arl6	29.9031	0.211751	0.284564	0.744125	0.456801	0.999499
Arl6ip1	794.399	0.0467439	0.153188	0.305141	0.760259	0.999499
Arl6ip4	195.557	0.104943	0.170407	0.615835	0.538003	0.999499
Arl6ip5	65.5488	0.181081	0.238223	0.760132	0.447176	0.999499
Arl6ip6	33.3925	0.229122	0.218555	1.04835	0.294477	0.999499
Arl8a	79.3408	0.46042	0.258257	1.7828	0.0746189	0.999499
Arl8b	279.995	0.0997616	0.0965829	1.03291	0.301645	0.999499
Armc1	338.805	-0.0558798	0.141127	-0.395955	0.692138	0.999499
Armc10	23.2643	0.0431049	0.283585	0.152	0.879187	0.999499
Armc5	26.9053	-0.12489	0.280712	-0.444903	0.65639	0.999499
Armc6	28.8782	0.379436	0.196743	1.92859	0.0537817	0.999499
Armc8	137.088	-0.0708921	0.201982	-0.350982	0.725602	0.999499
Armc9	40.2791	0.0255561	0.196589	0.129998	0.896568	0.999499
Armcx1	77.8339	0.189596	0.179581	1.05577	0.291073	0.999499
Armcx2	174.634	0.0480531	0.163556	0.293802	0.768909	0.999499
Armcx3	127.813	0.0310905	0.132608	0.234455	0.814632	0.999499
Armcx4	85.083	0.295596	0.162225	1.82214	0.0684337	0.999499
Armcx5	71.4135	-0.165428	0.162905	-1.01549	0.309874	0.999499
Armcx6	19.281	-0.0260297	0.319044	-0.0815865	0.934976	0.999499
Arnt	85.2511	-0.0991324	0.171598	-0.577702	0.563465	0.999499
Arnt2	150.16	-0.0506133	0.198102	-0.255491	0.798344	0.999499
Arntl	32.0523	0.168776	0.332615	0.50742	0.61186	0.999499
Arpc1a	207.18	0.138946	0.200324	0.69361	0.487927	0.999499
Arpc1b	89.8206	0.323272	0.21014	1.53836	0.12396	0.999499
Arpc3	155.06	0.209179	0.138682	1.50834	0.131468	0.999499
Arpc4	219.115	0.705216	0.443964	1.58845	0.112184	0.999499
Arpc5	85.9321	-0.00387502	0.199796	-0.0193949	0.984526	0.999499
Arpc5l	371.603	-0.0477674	0.122087	-0.391258	0.695607	0.999499
Arpp19	219.716	0.18736	0.108489	1.727	0.0841676	0.999499
Arpp21	549.837	-0.187128	0.116826	-1.60176	0.109208	0.999499
Arrb1	411.914	-0.0248175	0.193742	-0.128096	0.898073	0.999499
Arrb2	150.81	0.052624	0.134068	0.392519	0.694675	0.999499
Arrdc3	76.5932	-0.0605136	0.199036	-0.304033	0.761103	0.999499
Arsa	27.7343	0.09771	0.229773	0.425245	0.670658	0.999499
Arsb	32.0444	-0.30266	0.292714	-1.03398	0.301147	0.999499
Arsg	30.4481	-0.292856	0.348857	-0.839471	0.401205	0.999499
Arsk	25.6146	-0.0605612	0.239746	-0.252606	0.800573	0.999499
Arvcf	35.2144	0.170951	0.229036	0.746393	0.45543	0.999499
Arxes1	57.3891	0.0625625	0.173877	0.359808	0.718991	0.999499
Arxes2	138.194	-0.141066	0.142403	-0.990609	0.321877	0.999499
As3mt	15.0848	-0.0712792	0.407471	-0.174931	0.861134	0.999499
Asah1	34.7803	-0.0118428	0.214254	-0.0552743	0.95592	0.999499
Asah2	40.6064	-0.136798	0.281062	-0.486718	0.626458	0.999499
Asap1	277.494	-0.020889	0.114814	-0.181937	0.855632	0.999499
Asap2	57.2106	-0.228819	0.247077	-0.926104	0.354392	0.999499
Asb1	73.7034	-0.0550826	0.164101	-0.335662	0.737126	0.999499
Asb13	70.0638	0.076572	0.188857	0.405449	0.685147	0.999499
Asb3	38.0529	-0.206793	0.21742	-0.951124	0.341541	0.999499
Asb4	15.861	0.409675	0.494868	0.827847	0.407757	0.999499
Asb7	53.0022	0.130617	0.225365	0.579581	0.562198	0.999499
Asb8	110.342	0.0413027	0.188695	0.218886	0.826739	0.999499
Ascc1	27.3195	-0.0907963	0.30715	-0.295609	0.767529	0.999499
Ascc2	33.8698	0.148514	0.178124	0.833765	0.404413	0.999499
Ascc3	94.3583	0.0798008	0.154582	0.516237	0.605689	0.999499
Asf1a	100.723	0.108517	0.214858	0.505066	0.613512	0.999499
Asgr1	41.029	-0.27208	0.242437	-1.12227	0.261747	0.999499
Ash1l	1232.16	-0.14602	0.142197	-1.02689	0.304474	0.999499
Ash2l	78.9483	0.123601	0.159804	0.773454	0.439254	0.999499
Asic1	129.009	0.49211	0.239148	2.05777	0.0396126	0.999499
Asic2	49.3151	0.0361354	0.221327	0.163267	0.870308	0.999499
Asna1	66.6301	0.0309323	0.191828	0.161251	0.871896	0.999499
Asns	88.9604	0.0423145	0.186937	0.226357	0.820924	0.999499
Asnsd1	17.0206	-0.162634	0.328977	-0.494363	0.62105	0.999499
Aspa	55.0218	-0.311079	0.195246	-1.59327	0.1111	0.999499
Asph	706.879	-0.1541	0.145569	-1.0586	0.289781	0.999499
Asphd1	33.5685	0.0325026	0.181279	0.179296	0.857705	0.999499
Asphd2	109.489	0.20897	0.213339	0.979519	0.327324	0.999499
Asrgl1	246.211	0.0349782	0.112688	0.310398	0.756258	0.999499
Aste1	25.2108	0.0901903	0.275987	0.326792	0.743825	0.999499
Astn1	102.49	0.113371	0.221319	0.512253	0.608474	0.999499
Astn2	65.1039	0.204043	0.267523	0.762714	0.445634	0.999499
Asun	44.972	0.0125446	0.233052	0.0538273	0.957073	0.999499
Asxl1	71.4863	0.111342	0.161823	0.688048	0.491422	0.999499
Asxl2	173.939	0.123062	0.12347	0.996699	0.318911	0.999499
Asxl3	27.4249	0.168028	0.25986	0.64661	0.517884	0.999499
Atad1	143.723	-0.146462	0.267817	-0.546874	0.584466	0.999499
Atad2	35.325	-0.299966	0.17747	-1.69023	0.090983	0.999499
Atad2b	207.56	-0.0106633	0.12042	-0.0885507	0.929439	0.999499
Atad3a	69.1277	0.0316232	0.222837	0.141912	0.88715	0.999499
Atad5	42.2443	-0.160713	0.184979	-0.868818	0.384947	0.999499
Atat1	46.141	-0.0348774	0.2217	-0.157318	0.874994	0.999499
Atcay	114.909	-0.041951	0.14917	-0.28123	0.778534	0.999499
Ate1	335.991	-0.0874079	0.0892619	-0.979229	0.327467	0.999499
Atf1	65.6382	0.0276156	0.20054	0.137706	0.890473	0.999499
Atf2	187.427	0.26373	0.168653	1.56374	0.117879	0.999499
Atf4	512.333	0.18505	0.228818	0.808722	0.418675	0.999499
Atf5	60.1507	0.143062	0.28726	0.498025	0.618467	0.999499
Atf6	106.907	-0.0204195	0.151123	-0.135118	0.892519	0.999499
Atf6b	129.621	0.134628	0.160483	0.838895	0.401528	0.999499
Atf7	121.064	0.210031	0.171863	1.22208	0.221676	0.999499
Atf7ip	239.105	-0.157588	0.102386	-1.53917	0.123764	0.999499
Atg10	41.2878	0.249685	0.331052	0.754218	0.450718	0.999499
Atg101	87.7103	0.125998	0.269696	0.467187	0.640366	0.999499
Atg12	160.705	-0.149651	0.193062	-0.775143	0.438255	0.999499
Atg13	86.1097	-0.144925	0.148835	-0.97373	0.330191	0.999499
Atg14	60.1374	0.18377	0.154262	1.19129	0.233539	0.999499
Atg16l1	104.758	0.0744278	0.124558	0.597533	0.550152	0.999499
Atg16l2	65.8004	0.100028	0.172561	0.579666	0.56214	0.999499
Atg2a	79.3572	0.16049	0.191066	0.839971	0.400924	0.999499
Atg2b	154.587	-0.157872	0.194654	-0.81104	0.417342	0.999499
Atg3	111.026	-0.121066	0.218051	-0.555219	0.578745	0.999499
Atg4a	16.3619	0.396219	0.296346	1.33701	0.181218	0.999499
Atg4b	149.888	-0.104026	0.137387	-0.757175	0.448945	0.999499
Atg4c	43.2001	0.387369	0.293797	1.31849	0.18734	0.999499
Atg4d	47.0033	0.0336862	0.238096	0.141481	0.88749	0.999499
Atg5	84.1691	0.0943898	0.125963	0.749347	0.453648	0.999499
Atg7	65.7578	0.060609	0.227451	0.26647	0.789877	0.999499
Atic	49.0736	-0.211959	0.181636	-1.16694	0.243233	0.999499
Atl1	114.983	-0.00428234	0.167763	-0.0255261	0.979635	0.999499
Atl2	179.4	0.0125421	0.194486	0.0644883	0.948581	0.999499
Atl3	34.9155	-0.327324	0.214751	-1.5242	0.127459	0.999499
Atm	87.358	-0.09858	0.165908	-0.594184	0.552389	0.999499
Atmin	135.513	-0.0950285	0.147321	-0.645042	0.5189	0.999499
Atn1	43.6865	0.583711	0.26779	2.17974	0.0292769	0.999499
Atox1	80.2987	0.386312	0.28564	1.35244	0.176233	0.999499
Atp11a	103.989	-0.0470928	0.155067	-0.303694	0.761361	0.999499
Atp11b	193.461	0.0371958	0.193415	0.192311	0.847498	0.999499
Atp11c	87.5993	-0.0262557	0.1942	-0.135199	0.892454	0.999499
Atp13a1	54.1072	-0.240931	0.178035	-1.35328	0.175968	0.999499
Atp13a2	184.216	0.058422	0.112156	0.520897	0.602438	0.999499
Atp13a3	103.349	0.31605	0.2071	1.52607	0.126993	0.999499
Atp13a4	18.9368	-0.189522	0.262921	-0.720833	0.471013	0.999499
Atp13a5	14.7323	-0.214478	0.305958	-0.701004	0.4833	0.999499
Atp1a1	2433.84	-0.0955298	0.199927	-0.477823	0.632776	0.999499
Atp1a2	2823.04	-0.125346	0.232781	-0.538473	0.590251	0.999499
Atp1a3	1121.51	0.187726	0.104076	1.80373	0.0712736	0.999499
Atp1b1	6584.12	-0.0476144	0.092064	-0.517188	0.605025	0.999499
Atp1b2	970.678	-0.213864	0.181811	-1.1763	0.239476	0.999499
Atp1b3	209.921	-0.201301	0.209143	-0.962504	0.335797	0.999499
Atp2a2	1312.21	0.0985486	0.0873164	1.12864	0.259051	0.999499
Atp2a3	152.181	0.640498	0.385783	1.66025	0.0968633	0.999499
Atp2b1	1398.82	0.0506188	0.0803332	0.630111	0.528622	0.999499
Atp2b2	1449.91	0.0221312	0.134112	0.16502	0.868928	0.999499
Atp2b3	578.631	0.223365	0.204944	1.08988	0.275766	0.999499
Atp2b4	139.91	-0.202319	0.190632	-1.06131	0.288549	0.999499
Atp2c1	167.855	0.239882	0.152649	1.57145	0.116077	0.999499
Atp5a1	1424.5	-0.0508208	0.116362	-0.436747	0.662295	0.999499
Atp5b	1518.63	-0.0635796	0.116759	-0.544536	0.586073	0.999499
Atp5c1	309.796	-0.0810532	0.102256	-0.792652	0.427981	0.999499
Atp5d	496.464	0.176072	0.185605	0.948641	0.342803	0.999499
Atp5e	322.965	-0.0352219	0.106871	-0.329572	0.741723	0.999499
Atp5f1	410.981	0.0581867	0.132166	0.440255	0.659752	0.999499
Atp5g1	56.4236	-0.0511066	0.18118	-0.282077	0.777884	0.999499
Atp5g3	1775.88	-0.227702	0.211539	-1.07641	0.281744	0.999499
Atp5h	277.096	-0.182831	0.221991	-0.823595	0.41017	0.999499
Atp5j	316.506	0.51212	0.443519	1.15467	0.248224	0.999499
Atp5j2	555.769	0.0405528	0.175053	0.23166	0.816802	0.999499
Atp5k	960.403	0.0763437	0.181401	0.420855	0.673861	0.999499
Atp5l	17.1171	-0.177342	0.376425	-0.471122	0.637554	0.999499
Atp5s	24.2724	-0.209526	0.356671	-0.58745	0.556902	0.999499
Atp5sl	115.472	0.11108	0.207261	0.535942	0.591999	0.999499
Atp6ap1	853.424	0.0229051	0.205346	0.111544	0.911185	0.999499
Atp6ap2	728.463	-0.160439	0.202932	-0.790605	0.429175	0.999499
Atp6v0a1	788.71	0.204664	0.151205	1.35355	0.175878	0.999499
Atp6v0a2	70.0236	0.332758	0.210391	1.58162	0.113736	0.999499
Atp6v0b	464.088	0.351314	0.234716	1.49676	0.134455	0.999499
Atp6v0d1	169.864	0.143872	0.141759	1.01491	0.31015	0.999499
Atp6v0e	130.69	0.00574303	0.179998	0.0319061	0.974547	0.999499
Atp6v0e2	552.029	-0.0472625	0.182923	-0.258374	0.796118	0.999499
Atp6v1a	1623.18	-0.0606432	0.118507	-0.511725	0.608843	0.999499
Atp6v1b2	1482.48	-0.171715	0.165002	-1.04068	0.298023	0.999499
Atp6v1c1	338.861	0.0509395	0.110483	0.461061	0.644755	0.999499
Atp6v1d	807.489	-0.0250014	0.0827481	-0.302139	0.762546	0.999499
Atp6v1e1	821.283	-0.15064	0.0903763	-1.66681	0.0955532	0.999499
Atp6v1f	905.482	0.0141559	0.128783	0.10992	0.912472	0.999499
Atp6v1g1	42.6519	0.0908055	0.288972	0.314236	0.753341	0.999499
Atp6v1g2	695.759	0.0746623	0.199273	0.374673	0.707903	0.999499
Atp6v1h	203.681	0.0650299	0.195668	0.332349	0.739626	0.999499
Atp7a	45.4787	0.00763784	0.19694	0.0387826	0.969064	0.999499
Atp8a1	330.035	0.118795	0.108863	1.09124	0.275168	0.999499
Atp8a2	35.6075	-0.260621	0.256352	-1.01665	0.309318	0.999499
Atp8b2	48.2128	0.11587	0.263821	0.439199	0.660517	0.999499
Atp9a	1158.33	-0.0356397	0.157395	-0.226434	0.820864	0.999499
Atp9b	67.2832	0.245595	0.195082	1.25893	0.208055	0.999499
Atpaf1	59.4279	-0.24892	0.228757	-1.08814	0.276533	0.999499
Atpif1	610.243	-0.0492235	0.0924882	-0.532214	0.594578	0.999499
Atr	75.0156	0.0560279	0.124375	0.450476	0.652368	0.999499
Atraid	175.065	0.0476667	0.168245	0.283317	0.776934	0.999499
Atrip	49.097	0.142527	0.243582	0.585131	0.55846	0.999499
Atrn	170.1	-0.106222	0.263972	-0.402397	0.687392	0.999499
Atrnl1	56.0589	0.0148183	0.248613	0.0596039	0.952471	0.999499
Atrx	1444.9	-0.0885627	0.109575	-0.808237	0.418954	0.999499
Atxn1	195.104	0.190462	0.161552	1.17896	0.238415	0.999499
Atxn1l	26.7207	0.299433	0.287977	1.03978	0.298441	0.999499
Atxn2	417.64	0.159501	0.102648	1.55386	0.120217	0.999499
Atxn2l	48.9601	0.41316	0.164295	2.51474	0.011912	0.999499
Atxn3	58.9233	-0.0880187	0.146988	-0.598816	0.549295	0.999499
Atxn7	122.319	-0.0320534	0.175185	-0.182969	0.854823	0.999499
Atxn7l1	70.0424	0.0385483	0.200093	0.192652	0.847232	0.999499
Atxn7l2	18.2788	0.209138	0.409332	0.510924	0.609404	0.999499
Atxn7l3	239.25	0.22954	0.153261	1.49771	0.134209	0.999499
Atxn7l3b	826.325	0.243755	0.139185	1.75131	0.0798929	0.999499
Auh	185.223	0.0136296	0.173054	0.0787595	0.937224	0.999499
Aup1	150.767	-0.0445256	0.206574	-0.215543	0.829344	0.999499
Aurkaip1	147.788	-0.139599	0.149371	-0.934578	0.350006	0.999499
Auts2	479.823	0.0857438	0.168096	0.510089	0.609989	0.999499
Aven	31.0567	-0.0229348	0.225763	-0.101588	0.919084	0.999499
Avl9	154.335	-0.115172	0.165957	-0.69399	0.487689	0.999499
Avpi1	39.0882	0.0726359	0.322243	0.225407	0.821662	0.999499
Axin1	53.8008	0.00391555	0.171647	0.0228116	0.981801	0.999499
Axin2	28.2948	0.326575	0.33821	0.965598	0.334245	0.999499
Axl	68.9901	0.454557	0.217539	2.08954	0.0366589	0.999499
Azi2	143.657	0.0368481	0.144743	0.254576	0.79905	0.999499
Azin1	176.563	0.115505	0.148138	0.779713	0.43556	0.999499
Azin2	30.2378	-0.189607	0.194535	-0.97467	0.329724	0.999499
B020018G12Rik	43.5005	0.476016	0.246474	1.9313	0.0534456	0.999499
B130006D01Rik	16.0581	0.152471	0.286823	0.531584	0.595014	0.999499
B230118H07Rik	159.725	0.093686	0.153853	0.60893	0.542571	0.999499
B230216N24Rik	16.3576	0.0781929	0.340716	0.229495	0.818484	0.999499
B230217C12Rik	192.959	0.182334	0.132149	1.37976	0.16766	0.999499
B230217O12Rik	13.534	-0.25005	0.341727	-0.731724	0.464337	0.999499
B230219D22Rik	562.684	-0.0343932	0.078527	-0.437979	0.661401	0.999499
B230312C02Rik	25.1343	-0.10142	0.278278	-0.364455	0.715518	0.999499
B230325K18Rik	43.6757	0.128291	0.35571	0.360663	0.718352	0.999499
B230369F24Rik	19.4819	0.330869	0.322968	1.02446	0.305618	0.999499
B2m	441.399	0.451852	0.327639	1.37912	0.167859	0.999499
B330016D10Rik	18.2193	-0.140998	0.313556	-0.449675	0.652945	0.999499
B3galnt1	35.1341	0.00559992	0.215227	0.0260187	0.979242	0.999499
B3galnt2	21.6173	0.0197424	0.407368	0.0484634	0.961347	0.999499
B3galt1	56.0051	0.147526	0.181352	0.81348	0.415943	0.999499
B3galt2	78.3985	-0.113333	0.187047	-0.605907	0.544577	0.999499
B3galt5	142.075	0.388059	0.17015	2.28068	0.0225672	0.999499
B3galt6	15.8947	0.0179725	0.2565	0.0700683	0.944139	0.999499
B3gat1	147.677	0.0403109	0.182623	0.220733	0.825301	0.999499
B3gat2	50.997	-0.190656	0.156727	-1.21648	0.223801	0.999499
B3gat3	116.584	0.072848	0.150926	0.482673	0.629328	0.999499
B3glct	80.4583	0.110553	0.157123	0.703606	0.481678	0.999499
B3gnt1	141.709	-0.240155	0.155911	-1.54034	0.123478	0.999499
B3gnt5	19.9297	0.199216	0.35701	0.558012	0.576836	0.999499
B4galnt1	84.1554	0.134478	0.206966	0.64976	0.515847	0.999499
B4galt1	15.6603	-0.033701	0.301463	-0.111791	0.910989	0.999499
B4galt2	44.1264	0.230483	0.212214	1.08609	0.277439	0.999499
B4galt3	63.6115	0.158886	0.154463	1.02863	0.303652	0.999499
B4galt4	27.6539	0.11297	0.311037	0.363206	0.716451	0.999499
B4galt5	70.4672	0.148984	0.178737	0.833541	0.40454	0.999499
B4galt6	173.079	0.0359619	0.169341	0.212363	0.831824	0.999499
B4galt7	38.1447	0.478589	0.346885	1.37968	0.167686	0.999499
B630005N14Rik	118.157	-0.00742792	0.175337	-0.0423637	0.966209	0.999499
B630019K06Rik	74.1136	-0.144922	0.207728	-0.697651	0.485396	0.999499
B830012L14Rik	53.4507	0.214708	0.232768	0.92241	0.356315	0.999499
B930041F14Rik	171.974	-0.168973	0.19431	-0.869608	0.384515	0.999499
B930095G15Rik	259.38	-0.03072	0.143043	-0.21476	0.829954	0.999499
B9d1	18.8844	0.258455	0.312254	0.827706	0.407837	0.999499
B9d2	30.8601	0.236558	0.292987	0.807401	0.419436	0.999499
BC002059	54.8645	-0.0165414	0.168012	-0.0984542	0.921572	0.999499
BC002163	79.4599	-0.228638	0.26095	-0.876176	0.380934	0.999499
BC003331	172.381	0.0238717	0.106316	0.224537	0.82234	0.999499
BC003965	91.7901	0.0514874	0.142722	0.360753	0.718284	0.999499
BC004004	121.588	-0.0423206	0.195506	-0.216467	0.828624	0.999499
BC005537	254.606	0.029679	0.130274	0.22782	0.819786	0.999499
BC005561	351.981	-0.0275462	0.0926862	-0.297198	0.766315	0.999499
BC005624	115.314	-0.234195	0.179984	-1.3012	0.193191	0.999499
BC007180	67.3125	-0.237088	0.231081	-1.026	0.304893	0.999499
BC017158	28.7826	0.00863298	0.268829	0.0321133	0.974382	0.999499
BC017643	43.378	-0.0410693	0.202878	-0.202434	0.839577	0.999499
BC023829	41.894	0.143865	0.191797	0.750094	0.453198	0.999499
BC026585	23.4756	0.282197	0.340061	0.829843	0.406627	0.999499
BC029214	61.3126	0.0628973	0.219334	0.286766	0.774292	0.999499
BC029722	80.9524	0.0916104	0.173332	0.528527	0.597134	0.999499
BC030336	178.156	-0.0180946	0.191729	-0.0943757	0.924811	0.999499
BC031181	322.349	0.101648	0.185173	0.548934	0.583051	0.999499
BC037034	132.94	-0.0683119	0.150593	-0.453621	0.650102	0.999499
BC048546	16.5071	-0.846577	0.446457	-1.89621	0.0579321	0.999499
BC051142	24.1092	-0.286424	0.258047	-1.10997	0.267013	0.999499
BC051226	19.9318	-0.303642	0.364696	-0.832589	0.405077	0.999499
BC052040	29.112	-0.207659	0.258611	-0.802979	0.421987	0.999499
BC065397	26.4838	0.404461	0.23631	1.71157	0.0869756	0.999499
BC068281	29.8965	0.387414	0.271883	1.42493	0.154178	0.999499
BX510318,1	20.5814	0.358151	0.408841	0.876016	0.381021	0.999499
Babam1	128.574	-0.0053561	0.125666	-0.0426218	0.966003	0.999499
Bace1	244.143	-0.00709451	0.105874	-0.0670089	0.946575	0.999499
Bach2	80.5839	0.0541026	0.173169	0.312426	0.754717	0.999499
Bad	162.651	0.220004	0.241453	0.911166	0.362208	0.999499
Bag1	137.539	0.233446	0.15982	1.46068	0.144103	0.999499
Bag2	14.3346	0.45027	0.424673	1.06028	0.289019	0.999499
Bag3	82.2519	-0.0442214	0.191112	-0.23139	0.817012	0.999499
Bag5	94.2392	-0.214009	0.142264	-1.50431	0.132502	0.999499
Bag6	180.086	0.0804409	0.125143	0.642792	0.520359	0.999499
Bahcc1	27.1374	0.279402	0.299575	0.932661	0.350995	0.999499
Bahd1	26.8304	-0.268178	0.350198	-0.76579	0.443802	0.999499
Bai1	160.409	0.209842	0.179875	1.1666	0.243372	0.999499
Bai2	47.0097	0.542458	0.335362	1.61753	0.105764	0.999499
Bai3	509.373	-0.146082	0.118048	-1.23748	0.21591	0.999499
Baiap2	234.328	0.208336	0.18041	1.15479	0.248178	0.999499
Baiap3	47.2818	0.164392	0.348297	0.471986	0.636937	0.999499
Bambi	14.5567	0.765779	0.510402	1.50035	0.133525	0.999499
Banf1	110.816	-0.0572245	0.19018	-0.300897	0.763493	0.999499
Banp	211.44	0.148095	0.129989	1.13929	0.254584	0.999499
Bap1	70.6161	0.0533384	0.130075	0.41006	0.681762	0.999499
Barhl1	23.9143	-0.230717	0.291358	-0.791866	0.428439	0.999499
Barhl2	33.383	-0.0938607	0.355611	-0.263942	0.791824	0.999499
Basp1	792.42	0.212046	0.250688	0.845856	0.397633	0.999499
Bax	13.6335	0.23819	0.476485	0.49989	0.617153	0.999499
Baz1b	661.424	-0.0324941	0.0889956	-0.36512	0.715021	0.999499
Baz2a	286.756	0.0191416	0.133822	0.143038	0.88626	0.999499
Baz2b	888.531	0.0262566	0.117984	0.222544	0.82389	0.999499
Bbc3	21.4373	-0.180581	0.21903	-0.824459	0.409679	0.999499
Bbip1	138.037	0.112466	0.123567	0.91016	0.362738	0.999499
Bbs1	24.1518	0.0414406	0.281227	0.147357	0.88285	0.999499
Bbs2	26.3146	-0.097619	0.186559	-0.52326	0.600793	0.999499
Bbs4	131.738	0.172466	0.200621	0.859659	0.389977	0.999499
Bbs7	13.4686	0.090058	0.290993	0.309484	0.756953	0.999499
Bbs9	29.0518	-0.0121138	0.223727	-0.0541455	0.956819	0.999499
Bbx	199.45	0.142803	0.160625	0.889042	0.37398	0.999499
Bcan	406.995	0.0294306	0.11969	0.245889	0.805768	0.999499
Bcap29	68.6043	0.236184	0.207616	1.1376	0.255289	0.999499
Bcap31	162.778	0.00594781	0.112949	0.0526592	0.958003	0.999499
Bcar1	105.792	-0.361744	0.310163	-1.1663	0.243491	0.999499
Bcar3	18.4256	0.201967	0.314687	0.641805	0.521	0.999499
Bcas1	596.925	-0.0741371	0.126992	-0.583795	0.559358	0.999499
Bcas2	113.88	0.172015	0.160207	1.0737	0.282955	0.999499
Bcas3	92.4803	-0.199047	0.183904	-1.08235	0.279099	0.999499
Bcat1	151.804	0.0980346	0.139804	0.701227	0.483161	0.999499
Bcat2	19.3066	0.053076	0.257863	0.20583	0.836924	0.999499
Bccip	41.3984	0.388503	0.333114	1.16628	0.243503	0.999499
Bcdin3d	14.3625	0.0364703	0.322895	0.112948	0.910072	0.999499
Bckdha	29.6105	-0.229736	0.195705	-1.17389	0.240438	0.999499
Bckdhb	90.6212	-0.225014	0.167966	-1.33964	0.180363	0.999499
Bckdk	41.0457	0.131946	0.229343	0.575323	0.565073	0.999499
Bcl10	33.0988	-0.0807067	0.293183	-0.275277	0.783103	0.999499
Bcl11a	112.558	0.0427023	0.164101	0.260219	0.794694	0.999499
Bcl11b	48.1502	0.325548	0.282793	1.15119	0.249655	0.999499
Bcl2	117.472	0.21955	0.121589	1.80567	0.0709696	0.999499
Bcl2l1	169.126	0.188566	0.222999	0.845591	0.397781	0.999499
Bcl2l11	20.9805	-0.518825	0.307415	-1.6877	0.0914691	0.999499
Bcl2l13	113.399	0.259327	0.200034	1.29642	0.194832	0.999499
Bcl2l15	38.368	-0.0109861	0.333883	-0.032904	0.973751	0.999499
Bcl2l2	48.3152	0.126207	0.193587	0.651943	0.514438	0.999499
Bcl6	140.954	-0.026673	0.133729	-0.199456	0.841906	0.999499
Bcl7a	244.205	-0.08772	0.124627	-0.703859	0.48152	0.999499
Bcl7b	110.21	0.103733	0.147515	0.7032	0.481931	0.999499
Bcl7c	15.0089	-0.364775	0.285495	-1.27769	0.201358	0.999499
Bcl9	79.4467	0.144652	0.167663	0.862755	0.388272	0.999499
Bcl9l	301.147	0.222921	0.148692	1.49921	0.133819	0.999499
Bclaf1	897.383	-0.0980622	0.0745054	-1.31618	0.188115	0.999499
Bcor	20.3749	0.302494	0.270856	1.11681	0.264077	0.999499
Bcorl1	118.235	-0.0528608	0.144647	-0.365448	0.714777	0.999499
Bcr	163.211	0.241264	0.165813	1.45504	0.145658	0.999499
Bcs1l	55.7886	0.327857	0.20858	1.57185	0.115984	0.999499
Bdh1	155.95	-0.0617204	0.132386	-0.466215	0.641061	0.999499
Bdp1	220.333	0.0437794	0.108973	0.401746	0.687871	0.999499
Bean1	45.7278	-0.0452957	0.204899	-0.221064	0.825043	0.999499
Becn1	189.953	0.192124	0.115695	1.66062	0.0967908	0.999499
Begain	57.0885	0.354691	0.304358	1.16537	0.243868	0.999499
Bend5	22.1528	-0.0602509	0.257836	-0.233679	0.815235	0.999499
Bend6	1144.65	0.0322795	0.0863819	0.373684	0.70864	0.999499
Bend7	40.1233	0.185696	0.262431	0.707602	0.479193	0.999499
Bet1	18.8621	0.75938	0.405849	1.87109	0.0613329	0.999499
Bet1l	191.026	0.015201	0.147248	0.103234	0.917777	0.999499
Bex1	167.206	-0.00940516	0.165858	-0.0567059	0.954779	0.999499
Bex2	475.552	-0.0323489	0.130287	-0.24829	0.80391	0.999499
Bex4	61.0312	0.137971	0.174241	0.791841	0.428454	0.999499
Bfar	128.918	-0.133705	0.19457	-0.687178	0.49197	0.999499
Bgn	33.9112	0.384484	0.283724	1.35513	0.175375	0.999499
Bhlhb9	85.564	0.00218762	0.122822	0.0178113	0.985789	0.999499
Bhlhe22	174.407	0.0344849	0.199763	0.172629	0.862943	0.999499
Bhlhe40	67.963	-0.0907861	0.252252	-0.359902	0.718921	0.999499
Bhlhe41	146.916	-0.175311	0.240064	-0.730268	0.465226	0.999499
Bicc1	60.6877	0.220528	0.234999	0.938423	0.348027	0.999499
Bicd1	335.238	0.0564346	0.119947	0.470497	0.638	0.999499
Bicd2	125.682	0.0456372	0.128046	0.356412	0.721532	0.999499
Bin1	333.991	0.0289092	0.208934	0.138366	0.889951	0.999499
Birc2	107.553	0.114228	0.150422	0.759386	0.447622	0.999499
Birc6	573.382	-0.0182525	0.120775	-0.151128	0.879875	0.999499
Bivm	35.6809	0.128609	0.240933	0.533794	0.593484	0.999499
Blcap	205.377	-0.0425319	0.124266	-0.342266	0.732151	0.999499
Blm	14.9386	-0.182296	0.303787	-0.600078	0.548455	0.999499
Blmh	286.805	0.142366	0.222289	0.640455	0.521877	0.999499
Bloc1s4	36.7805	-0.087942	0.247468	-0.355367	0.722315	0.999499
Bloc1s5	37.4567	-0.303937	0.191379	-1.58814	0.112255	0.999499
Bloc1s6	40.0071	-0.0638388	0.208781	-0.30577	0.75978	0.999499
Blvra	83.5399	-0.158212	0.133433	-1.18571	0.235738	0.999499
Blvrb	26.6024	-0.221922	0.212383	-1.04491	0.296062	0.999499
Blzf1	64.444	0.0842141	0.163224	0.515943	0.605894	0.999499
Bmi1	77.4219	0.0740226	0.186183	0.39758	0.69094	0.999499
Bmp1	87.9753	0.146023	0.204345	0.714593	0.474861	0.999499
Bmp2	14.4815	0.443419	0.404956	1.09498	0.273524	0.999499
Bmp2k	41.8936	0.0510214	0.218023	0.234018	0.814971	0.999499
Bmp4	16.0206	-0.184453	0.385969	-0.477897	0.632723	0.999499
Bmp5	18.7657	0.00819079	0.373539	0.0219275	0.982506	0.999499
Bmpr1a	114.384	0.191013	0.156651	1.21935	0.222711	0.999499
Bmpr1b	21.5646	-0.235008	0.232128	-1.01241	0.311344	0.999499
Bmpr2	370.975	-0.0749757	0.106817	-0.701911	0.482735	0.999499
Bms1	156.932	0.162374	0.115394	1.40712	0.159392	0.999499
Bmyc	85.0894	-0.0713321	0.192414	-0.370721	0.710845	0.999499
Bnip1	26.3379	-0.0159685	0.276519	-0.0577484	0.953949	0.999499
Bnip2	203.031	-0.0292688	0.132588	-0.22075	0.825287	0.999499
Bnip3	163.134	0.0776389	0.12387	0.626778	0.530805	0.999499
Bnip3l	120.553	-0.0427534	0.122429	-0.34921	0.726932	0.999499
Boc	84.5766	-0.271869	0.235324	-1.1553	0.247968	0.999499
Bod1	42.6107	-0.0703935	0.305541	-0.230389	0.817789	0.999499
Bod1l	841.864	-0.117938	0.0936822	-1.25892	0.208059	0.999499
Bok	24.9614	-0.00566081	0.285783	-0.0198081	0.984196	0.999499
Bola2	92.6121	-0.0905787	0.127593	-0.709902	0.477765	0.999499
Bola3	125.554	-0.117705	0.118624	-0.992251	0.321075	0.999499
Bop1	32.5621	0.094228	0.239201	0.393929	0.693634	0.999499
Bpgm	106.215	-0.238593	0.214918	-1.11016	0.266931	0.999499
Bphl	38.3221	-0.117987	0.252774	-0.466768	0.640666	0.999499
Bpnt1	91.4746	0.234132	0.197845	1.18341	0.236646	0.999499
Bptf	1020.19	-0.0132902	0.0776974	-0.17105	0.864184	0.999499
Braf	496.05	0.142772	0.131663	1.08437	0.2782	0.999499
Brap	69.3726	-0.164091	0.172293	-0.952396	0.340896	0.999499
Brat1	14.8788	0.112862	0.288207	0.391599	0.695355	0.999499
Brca2	27.1464	-0.353971	0.268781	-1.31695	0.187856	0.999499
Brcc3	82.3944	-0.163965	0.162956	-1.00619	0.314324	0.999499
Brd1	208.913	-0.0268319	0.179501	-0.149481	0.881174	0.999499
Brd2	555.696	0.0392459	0.18165	0.216053	0.828947	0.999499
Brd3	304.863	0.123023	0.107009	1.14965	0.250287	0.999499
Brd4	393.437	-0.311761	0.144683	-2.15478	0.0311788	0.999499
Brd7	197.563	0.0559855	0.136355	0.410585	0.681377	0.999499
Brd8	294.013	-0.0856986	0.101885	-0.841129	0.400275	0.999499
Brd9	244.663	0.0985732	0.152711	0.64549	0.51861	0.999499
Brdt	45.8333	0.277152	0.234531	1.18173	0.237313	0.999499
Bre	81.0416	-0.0405708	0.181736	-0.223241	0.823348	0.999499
Brf1	41.4889	-0.155674	0.223336	-0.69704	0.485778	0.999499
Brf2	14.9792	0.260524	0.274823	0.947971	0.343144	0.999499
Bri3bp	286.685	0.12129	0.103279	1.17439	0.240239	0.999499
Brinp1	277.829	-0.156379	0.130584	-1.19754	0.231096	0.999499
Brinp2	77.0262	0.235998	0.196199	1.20285	0.229035	0.999499
Brinp3	130.234	0.0889936	0.174271	0.510662	0.609587	0.999499
Brip1os	41.5657	0.264224	0.229534	1.15113	0.249678	0.999499
Brix1	46.2034	0.124052	0.222759	0.55689	0.577603	0.999499
Brk1	220.294	0.0589325	0.100029	0.589151	0.55576	0.999499
Brms1l	52.0609	0.136841	0.277942	0.492334	0.622483	0.999499
Brox	100.762	-0.358574	0.215744	-1.66203	0.096506	0.999499
Brpf1	132.547	0.00774958	0.161954	0.0478505	0.961835	0.999499
Brpf3	31.7873	-0.216567	0.42173	-0.513522	0.607586	0.999499
Brsk1	271.676	0.0476465	0.158641	0.300342	0.763917	0.999499
Brsk2	365.616	-0.0403528	0.0876636	-0.460314	0.645291	0.999499
Brwd3	93.3028	0.0339165	0.147734	0.229579	0.818419	0.999499
Bscl2	221.31	0.0398271	0.138377	0.287816	0.773487	0.999499
Bsdc1	44.0699	0.0664623	0.281311	0.236259	0.813231	0.999499
Bsg	451.216	0.0589763	0.124762	0.472711	0.63642	0.999499
Bsn	217.475	0.0471089	0.157314	0.299458	0.76459	0.999499
Btaf1	113.091	0.0269583	0.181008	0.148934	0.881606	0.999499
Btbd10	114.974	0.126934	0.199779	0.635375	0.525184	0.999499
Btbd17	109.586	-0.154505	0.296707	-0.520734	0.602552	0.999499
Btbd2	51.4595	0.38469	0.170713	2.25343	0.0242319	0.999499
Btbd3	630.499	-0.168438	0.177225	-0.950421	0.341898	0.999499
Btbd6	50.7984	-0.0961812	0.178535	-0.538724	0.590077	0.999499
Btbd7	30.0534	0.0669519	0.251023	0.266716	0.789687	0.999499
Btbd9	227.403	0.142066	0.166645	0.852506	0.393933	0.999499
Btd	14.8884	-0.116948	0.328121	-0.356416	0.721529	0.999499
Btf3l4	36.9441	0.253242	0.287634	0.880431	0.378626	0.999499
Btg1	246.669	-0.2174	0.34152	-0.636566	0.524408	0.999499
Btg2	34.7047	0.257287	0.365551	0.703834	0.481536	0.999499
Btrc	152.27	0.00250058	0.130097	0.0192208	0.984665	0.999499
Bub3	215.223	0.0960125	0.146587	0.654985	0.512477	0.999499
Bud13	48.9277	-0.16757	0.210036	-0.797815	0.424978	0.999499
Bud31	69.0589	-0.0620542	0.162228	-0.382513	0.702081	0.999499
Bysl	32.9209	-0.210112	0.1984	-1.05903	0.289585	0.999499
Bzrap1	313.263	0.0398754	0.0993772	0.401253	0.688234	0.999499
Bzw1	206.154	0.0603789	0.144224	0.418646	0.675475	0.999499
Bzw2	119.066	0.0743085	0.123954	0.599483	0.548851	0.999499
C030014I23Rik	17.8963	0.0767698	0.338915	0.226516	0.8208	0.999499
C030017K20Rik	30.501	-0.173902	0.254779	-0.68256	0.494885	0.999499
C030034I22Rik	17.3458	-0.107807	0.338834	-0.318171	0.750355	0.999499
C030037D09Rik	36.1176	-0.230557	0.240662	-0.958015	0.338055	0.999499
C130071C03Rik	124.762	0.0995104	0.167799	0.593031	0.55316	0.999499
C130074G19Rik	15.4036	0.1303	0.283029	0.460376	0.645246	0.999499
C1d	112.904	0.0532465	0.17093	0.31151	0.755413	0.999499
C1galt1c1	20.3559	0.303081	0.282494	1.07287	0.283328	0.999499
C1qa	65.8159	0.432677	0.427185	1.01286	0.311129	0.999499
C1qb	50.8004	0.411652	0.307237	1.33985	0.180294	0.999499
C1qbp	178.185	-0.230698	0.163606	-1.41008	0.158515	0.999499
C1qc	38.5813	0.714349	0.378774	1.88595	0.0593019	0.999499
C1ql1	19.3394	-0.613484	0.324095	-1.89292	0.0583691	0.999499
C1ql3	42.3037	-0.256093	0.218791	-1.17049	0.241803	0.999499
C1qtnf4	91.6175	0.301725	0.243746	1.23787	0.215765	0.999499
C230004F18Rik	50.5598	0.0151423	0.219191	0.0690825	0.944924	0.999499
C230037L18Rik	16.6155	0.109723	0.290088	0.378242	0.705251	0.999499
C2cd2	64.616	0.380134	0.162983	2.33236	0.0196819	0.999499
C2cd2l	124.532	0.0653928	0.117265	0.557651	0.577083	0.999499
C2cd3	52.4744	-0.192781	0.141314	-1.36421	0.172502	0.999499
C2cd5	76.7605	0.115914	0.219063	0.529133	0.596713	0.999499
C330006A16Rik	135.538	-0.0584131	0.18309	-0.319041	0.749696	0.999499
C330007P06Rik	23.1768	0.0486512	0.301461	0.161384	0.871791	0.999499
C330018D20Rik	21.1065	0.3002	0.366868	0.818278	0.413198	0.999499
C530008M17Rik	67.279	-0.0487845	0.197137	-0.247466	0.804548	0.999499
C630016N16Rik	15.9578	0.471601	0.450628	1.04654	0.295311	0.999499
C77080	19.0004	0.203225	0.279659	0.726687	0.467418	0.999499
C77370	132.702	0.187585	0.164284	1.14183	0.253524	0.999499
C78339	201.792	0.0669545	0.153994	0.434786	0.663717	0.999499
C87436	24.3017	-0.0751162	0.217321	-0.345647	0.729608	0.999499
Caap1	34.1515	0.109488	0.262558	0.417006	0.676674	0.999499
Cab39	225.916	0.0410854	0.152025	0.270254	0.786965	0.999499
Cab39l	93.8372	-0.306821	0.237235	-1.29332	0.195901	0.999499
Cabin1	118.613	0.0834204	0.154294	0.54066	0.588742	0.999499
Cables1	52.5998	-0.101849	0.170611	-0.596964	0.550531	0.999499
Cables2	64.2105	0.295144	0.329535	0.895638	0.370446	0.999499
Cabp1	195.514	0.119411	0.158017	0.755681	0.449841	0.999499
Cabp7	48.3117	-0.387981	0.485547	-0.79906	0.424256	0.999499
Cacfd1	94.705	0.0265533	0.197113	0.134712	0.89284	0.999499
Cachd1	82.4001	-0.0483828	0.221549	-0.218385	0.82713	0.999499
Cacna1a	1733.26	0.117434	0.142807	0.822325	0.410892	0.999499
Cacna1b	138.937	0.0548848	0.147963	0.370937	0.710684	0.999499
Cacna1c	65.0113	0.0922149	0.182572	0.505087	0.613498	0.999499
Cacna1d	212.725	0.388451	0.193202	2.01059	0.0443686	0.999499
Cacna1e	268.844	-0.00316077	0.136937	-0.0230819	0.981585	0.999499
Cacna1g	139.399	-0.0996152	0.14226	-0.700234	0.483781	0.999499
Cacna1i	41.6482	0.0119225	0.218576	0.054546	0.9565	0.999499
Cacna2d1	338.166	0.152269	0.153674	0.990862	0.321753	0.999499
Cacna2d2	728.389	0.399907	0.297852	1.34263	0.179391	0.999499
Cacna2d3	69.4943	-0.0404638	0.148871	-0.271804	0.785773	0.999499
Cacnb1	107.348	0.486117	0.306645	1.58528	0.112904	0.999499
Cacnb2	93.4962	-0.023682	0.166172	-0.142515	0.886673	0.999499
Cacnb3	31.1521	0.370932	0.235326	1.57625	0.114968	0.999499
Cacnb4	1258.81	0.00516501	0.172933	0.0298671	0.976173	0.999499
Cacng2	844.688	-0.185442	0.22196	-0.835475	0.40345	0.999499
Cacng3	40.166	0.450992	0.286306	1.57521	0.115208	0.999499
Cacng4	86.0791	0.168323	0.17224	0.977261	0.32844	0.999499
Cacng5	82.8938	0.0879961	0.192727	0.456584	0.64797	0.999499
Cacng7	360.508	0.257221	0.227881	1.12875	0.259003	0.999499
Cactin	45.0646	-0.0646461	0.217349	-0.297431	0.766138	0.999499
Cacul1	89.7438	0.151479	0.17955	0.843661	0.398859	0.999499
Cacybp	212.273	0.160716	0.141091	1.13909	0.254664	0.999499
Cad	32.5405	0.16771	0.343524	0.488203	0.625406	0.999499
Cadm1	453.903	0.0643166	0.0953521	0.674517	0.499983	0.999499
Cadm2	951.155	0.114446	0.101404	1.12862	0.259057	0.999499
Cadm3	867.41	0.346686	0.246287	1.40765	0.159235	0.999499
Cadm4	128.439	0.106351	0.184697	0.575811	0.564743	0.999499
Cadps	288.08	0.136926	0.164146	0.834171	0.404185	0.999499
Cadps2	276.27	0.0318523	0.203656	0.156402	0.875716	0.999499
Calb1	1246.03	0.0219091	0.213561	0.102589	0.918289	0.999499
Calb2	711.411	0.242456	0.157168	1.54265	0.122915	0.999499
Calca	15.0967	-0.385501	0.325463	-1.18447	0.236227	0.999499
Calcoco1	65.6054	-0.102692	0.21577	-0.475931	0.634123	0.999499
Calcrl	13.8669	0.0820082	0.35576	0.230516	0.817691	0.999499
Cald1	258.115	0.235555	0.165697	1.4216	0.155141	0.999499
Calm1	10463.4	-0.0932033	0.099905	-0.932919	0.350862	0.999499
Calm2	3140.51	0.00818912	0.144113	0.0568241	0.954685	0.999499
Calm3	2267.76	-0.00695613	0.11697	-0.0594696	0.952578	0.999499
Caln1	422.753	0.0479182	0.169636	0.282476	0.777578	0.999499
Calr	410.885	0.250869	0.119501	2.0993	0.0357909	0.999499
Calu	140.78	0.124244	0.252609	0.491846	0.622829	0.999499
Caly	120.355	0.330446	0.196226	1.68401	0.0921794	0.999499
Camk1	187.153	0.0445232	0.164449	0.270742	0.786589	0.999499
Camk1d	273.239	0.15697	0.201074	0.780658	0.435004	0.999499
Camk1g	54.7641	0.367348	0.206461	1.77927	0.0751963	0.999499
Camk2a	451.333	0.237878	0.197718	1.20312	0.228932	0.999499
Camk2b	943.217	-0.0351169	0.0948513	-0.370231	0.711211	0.999499
Camk2d	363.371	-0.0849678	0.127534	-0.666237	0.50526	0.999499
Camk2g	287.587	0.137879	0.151909	0.90764	0.364068	0.999499
Camk2n1	3366.54	0.0974423	0.0944728	1.03143	0.302338	0.999499
Camk2n2	293.468	0.0952193	0.153705	0.619494	0.535591	0.999499
Camk4	914.584	-0.020217	0.207896	-0.0972457	0.922531	0.999499
Camkk1	115.154	-0.335554	0.26148	-1.28329	0.199391	0.999499
Camkk2	722.515	0.0648505	0.15641	0.414618	0.678421	0.999499
Camkmt	16.5175	0.417172	0.370029	1.1274	0.259571	0.999499
Camkv	52.1414	0.691731	0.352993	1.95961	0.0500411	0.999499
Caml	49.9085	0.056109	0.175747	0.31926	0.749529	0.999499
Camsap1	196.147	-0.0918559	0.115647	-0.794281	0.427032	0.999499
Camsap2	384.119	0.0593121	0.11994	0.494513	0.620944	0.999499
Camsap3	62.7805	0.233696	0.239011	0.977762	0.328192	0.999499
Camta1	1289.91	-0.121331	0.175747	-0.690373	0.489959	0.999499
Camta2	250.071	0.178419	0.190907	0.934585	0.350002	0.999499
Cand1	175.672	-0.0858068	0.137539	-0.62387	0.532713	0.999499
Cant1	66.2296	-0.0482061	0.156933	-0.307176	0.758709	0.999499
Canx	611.667	0.0865545	0.0955447	0.905906	0.364986	0.999499
Cap1	111.1	-0.0387296	0.195885	-0.197717	0.843267	0.999499
Cap2	112.805	0.340284	0.145665	2.33608	0.019487	0.999499
Capn1	21.5028	-0.0583638	0.289742	-0.201433	0.84036	0.999499
Capn10	68.6162	0.215666	0.244044	0.883718	0.376848	0.999499
Capn15	46.4327	0.219783	0.262718	0.836571	0.402834	0.999499
Capn2	175.323	0.103919	0.191178	0.543571	0.586737	0.999499
Capn7	105.973	-0.19188	0.177619	-1.08029	0.280014	0.999499
Capns1	421.414	0.233944	0.195464	1.19686	0.231359	0.999499
Caprin1	321.988	0.0317233	0.0838489	0.378339	0.705179	0.999499
Caprin2	24.0401	-0.209662	0.274247	-0.764502	0.444568	0.999499
Capza2	242.845	0.103703	0.156597	0.66223	0.507824	0.999499
Capzb	401.288	0.0365764	0.233922	0.156362	0.875748	0.999499
Car10	562.546	0.0171676	0.129129	0.13295	0.894233	0.999499
Car11	152.623	0.218456	0.212572	1.02768	0.3041	0.999499
Car14	69.1975	-0.030566	0.184162	-0.165973	0.868178	0.999499
Car2	479.053	0.116212	0.19201	0.605238	0.545021	0.999499
Car4	208.662	0.136591	0.232183	0.58829	0.556338	0.999499
Car7	97.2932	0.148105	0.239995	0.617118	0.537157	0.999499
Car8	1035.93	0.226532	0.360245	0.628827	0.529463	0.999499
Card10	19.6044	-0.0493821	0.3988	-0.123827	0.901453	0.999499
Carf	59.3984	-0.217064	0.194928	-1.11356	0.265468	0.999499
Carhsp1	56.7631	-0.138861	0.19614	-0.707966	0.478967	0.999499
Carkd	58.9495	0.0165068	0.215228	0.0766948	0.938866	0.999499
Carm1	52.1032	-0.121309	0.17788	-0.68197	0.495258	0.999499
Carns1	48.3874	-0.140167	0.239504	-0.585237	0.558388	0.999499
Cars	37.7324	0.200627	0.180086	1.11406	0.265253	0.999499
Cars2	21.7919	-0.307078	0.262251	-1.17093	0.241626	0.999499
Cartpt	13.1066	0.304696	0.573241	0.531532	0.59505	0.999499
Casc3	187.338	-0.0425592	0.124964	-0.340572	0.733426	0.999499
Casc4	231.185	0.0359475	0.142335	0.252556	0.800611	0.999499
Casd1	120.713	0.0326946	0.13878	0.235586	0.813754	0.999499
Cask	143.528	0.153264	0.15149	1.01171	0.311679	0.999499
Caskin1	204.349	0.112217	0.211558	0.530432	0.595812	0.999499
Caskin2	17.1015	0.420742	0.267097	1.57524	0.1152	0.999499
Casp12	14.9494	0.0208324	0.379539	0.0548886	0.956227	0.999499
Casp2	19.9301	0.304662	0.327633	0.929888	0.352429	0.999499
Casp8ap2	182.479	-0.17334	0.115008	-1.5072	0.131759	0.999499
Casp9	37.6349	0.0576947	0.198238	0.291037	0.771023	0.999499
Casq2	74.9746	0.23868	0.251971	0.947251	0.343511	0.999499
Cast	73.848	0.351814	0.294297	1.19544	0.231916	0.999499
Casz1	37.4635	0.153788	0.27735	0.55449	0.579244	0.999499
Cat	66.4631	-0.0433315	0.211189	-0.205179	0.837432	0.999499
Catsper2	21.3949	-0.013372	0.303166	-0.0441077	0.964819	0.999499
Cav1	15.7715	0.285301	0.324343	0.879627	0.379062	0.999499
Cav2	24.2238	0.0294989	0.265779	0.11099	0.911624	0.999499
Cbfa2t2	41.3066	-0.131026	0.252364	-0.519196	0.603624	0.999499
Cbfa2t3	189.263	0.071396	0.18015	0.396315	0.691873	0.999499
Cbfb	49.8005	0.298957	0.234475	1.27501	0.202307	0.999499
Cbl	75.9852	-0.1999	0.151297	-1.32124	0.186422	0.999499
Cblb	44.0777	-0.0729415	0.197102	-0.37007	0.71133	0.999499
Cbll1	116.321	-0.0467111	0.12265	-0.38085	0.703315	0.999499
Cbln1	928.049	-0.098293	0.239169	-0.410978	0.681089	0.999499
Cbln2	53.3316	0.148947	0.317055	0.469782	0.638511	0.999499
Cbln3	1451.54	-0.181213	0.365119	-0.496313	0.619673	0.999499
Cbr1	156.999	-0.279105	0.192479	-1.45005	0.147043	0.999499
Cbr4	13.1698	0.236209	0.348783	0.677239	0.498254	0.999499
Cbs	37.1954	-0.315211	0.268835	-1.1725	0.240994	0.999499
Cbwd1	18.8033	0.496482	0.363302	1.36658	0.171757	0.999499
Cbx1	574.89	-0.208215	0.145517	-1.43086	0.15247	0.999499
Cbx3	313.983	-0.0905477	0.140354	-0.645138	0.518838	0.999499
Cbx4	105.327	0.135746	0.137068	0.990361	0.321998	0.999499
Cbx5	703.234	0.037341	0.0790697	0.472254	0.636745	0.999499
Cbx6	1225.56	0.177216	0.181708	0.975279	0.329422	0.999499
Cbx7	155.052	0.0953092	0.259826	0.36682	0.713753	0.999499
Cbx8	31.9057	0.0191987	0.283465	0.0677287	0.946002	0.999499
Cby1	63.3994	0.0405171	0.181588	0.223126	0.823437	0.999499
Cc2d1a	25.9994	0.0582717	0.264899	0.219977	0.825889	0.999499
Cc2d1b	56.5552	-0.263494	0.19963	-1.31991	0.186866	0.999499
Cc2d2a	151.005	-0.191424	0.113585	-1.68529	0.0919336	0.999499
Ccar1	276.532	-0.13126	0.109847	-1.19494	0.232111	0.999499
Ccbl1	51.1137	0.0560147	0.25313	0.221288	0.824868	0.999499
Ccdc101	28.8771	0.321572	0.241612	1.33094	0.183207	0.999499
Ccdc106	25.9352	0.200102	0.231764	0.863386	0.387925	0.999499
Ccdc112	66.1223	0.0517765	0.14387	0.359883	0.718934	0.999499
Ccdc115	41.6092	-0.12344	0.338956	-0.364178	0.715725	0.999499
Ccdc117	34.5965	0.360777	0.243699	1.48042	0.138762	0.999499
Ccdc12	76.887	0.0601469	0.163089	0.368797	0.712279	0.999499
Ccdc120	31.7196	0.388776	0.24989	1.55579	0.119757	0.999499
Ccdc124	54.4841	0.27177	0.159134	1.70781	0.0876709	0.999499
Ccdc126	17.2562	-0.18461	0.269758	-0.684355	0.493751	0.999499
Ccdc127	162.55	-0.111607	0.134995	-0.826749	0.40838	0.999499
Ccdc130	18.5403	-0.195718	0.335608	-0.583174	0.559776	0.999499
Ccdc132	83.5989	-0.140953	0.220169	-0.640204	0.52204	0.999499
Ccdc136	322.002	0.196091	0.162582	1.2061	0.227777	0.999499
Ccdc137	76.2377	-0.0957227	0.134105	-0.713791	0.475356	0.999499
Ccdc141	71.5663	0.0730515	0.198256	0.368471	0.712522	0.999499
Ccdc148	39.364	-0.188746	0.225461	-0.837153	0.402507	0.999499
Ccdc149	49.6954	0.188338	0.190156	0.990441	0.321958	0.999499
Ccdc15	20.9263	0.117637	0.233182	0.504485	0.613921	0.999499
Ccdc157	22.1128	-0.076001	0.299206	-0.254009	0.799489	0.999499
Ccdc163	16.6948	0.109443	0.37348	0.293037	0.769494	0.999499
Ccdc167	33.4321	0.106797	0.220776	0.483733	0.628575	0.999499
Ccdc171	20.3084	0.149211	0.297515	0.501525	0.616002	0.999499
Ccdc173	23.3462	0.286421	0.29702	0.964316	0.334888	0.999499
Ccdc174	134.849	-0.034548	0.135528	-0.254914	0.79879	0.999499
Ccdc176	42.4217	-0.0806269	0.23588	-0.341814	0.732491	0.999499
Ccdc177	210.248	0.104367	0.157146	0.664138	0.506602	0.999499
Ccdc18	20.0389	-0.0799671	0.285808	-0.279793	0.779637	0.999499
Ccdc181	74.1823	-0.0308833	0.164596	-0.187631	0.851166	0.999499
Ccdc184	64.4328	0.0676186	0.211663	0.319463	0.749376	0.999499
Ccdc186	268.713	-0.109948	0.0762639	-1.44167	0.149395	0.999499
Ccdc22	26.9634	0.167076	0.238859	0.699476	0.484255	0.999499
Ccdc23	18.9569	0.499624	0.278051	1.79688	0.0723549	0.999499
Ccdc25	104.09	-0.0916516	0.181056	-0.506205	0.612713	0.999499
Ccdc28a	77.1757	-0.205966	0.181541	-1.13454	0.256568	0.999499
Ccdc28b	76.2454	0.156991	0.208141	0.754255	0.450696	0.999499
Ccdc3	14.9771	-0.507054	0.312526	-1.62244	0.104709	0.999499
Ccdc30	21.5354	0.41172	0.271799	1.51479	0.129825	0.999499
Ccdc32	74.1709	0.0314206	0.145051	0.216617	0.828507	0.999499
Ccdc34	149.319	-0.263048	0.163131	-1.6125	0.106853	0.999499
Ccdc39	28.8286	0.0501578	0.192442	0.260639	0.794371	0.999499
Ccdc43	34.8611	0.111763	0.279951	0.399222	0.689729	0.999499
Ccdc47	189.185	0.0173057	0.0894315	0.193508	0.846561	0.999499
Ccdc50	246.744	0.0680849	0.124288	0.5478	0.583829	0.999499
Ccdc53	42.5353	0.135409	0.290684	0.46583	0.641337	0.999499
Ccdc55	149.908	-0.0781561	0.1398	-0.559056	0.576123	0.999499
Ccdc58	15.3719	0.314318	0.419999	0.748379	0.454231	0.999499
Ccdc59	206.502	-0.0262922	0.0957189	-0.274681	0.783561	0.999499
Ccdc6	97.9172	0.106012	0.239121	0.443341	0.657519	0.999499
Ccdc64	43.7529	0.197202	0.175073	1.1264	0.259996	0.999499
Ccdc66	90.5677	-0.05243	0.116988	-0.448165	0.654034	0.999499
Ccdc71	83.2755	0.208626	0.232074	0.898962	0.368673	0.999499
Ccdc71l	15.5362	0.20349	0.287533	0.707711	0.479125	0.999499
Ccdc74a	71.9364	-0.229493	0.214058	-1.07211	0.283673	0.999499
Ccdc77	36.1901	-0.488941	0.200528	-2.43826	0.0147581	0.999499
Ccdc82	245.565	-0.138922	0.126828	-1.09536	0.27336	0.999499
Ccdc84	35.5828	0.137215	0.208946	0.6567	0.511374	0.999499
Ccdc85a	50.5949	0.190223	0.230775	0.82428	0.409781	0.999499
Ccdc86	20.8584	0.00885592	0.250653	0.0353314	0.971815	0.999499
Ccdc88a	1013.25	-0.187927	0.180315	-1.04221	0.297313	0.999499
Ccdc9	51.3397	0.0640777	0.208905	0.306731	0.759048	0.999499
Ccdc90b	36.7007	0.537723	0.204427	2.63039	0.00852875	0.999499
Ccdc91	100.4	0.0943046	0.175355	0.537791	0.590721	0.999499
Ccdc92	316.873	0.00805681	0.119142	0.0676236	0.946085	0.999499
Ccdc93	48.8204	0.162358	0.1741	0.932557	0.351049	0.999499
Ccdc94	28.2177	-0.040349	0.266319	-0.151507	0.879576	0.999499
Ccdc97	85.5653	-0.254308	0.20154	-1.26183	0.207011	0.999499
Cck	208.33	0.353462	0.226353	1.56155	0.118393	0.999499
Ccl25	12.9924	-0.300873	0.429105	-0.701164	0.483201	0.999499
Ccl27a	21.5858	0.211849	0.456399	0.464175	0.642522	0.999499
Ccm2	56.3185	0.552267	0.245674	2.24797	0.0245783	0.999499
Ccnc	64.2331	0.292059	0.214446	1.36193	0.173221	0.999499
Ccnd1	79.1776	0.0408619	0.226957	0.180043	0.857119	0.999499
Ccnd2	51.8272	-0.0316576	0.218222	-0.145071	0.884655	0.999499
Ccnd3	93.9014	0.0832327	0.174825	0.476092	0.634009	0.999499
Ccndbp1	122.868	0.013675	0.245349	0.0557369	0.955551	0.999499
Ccne1	19.4215	-0.218694	0.294685	-0.742128	0.45801	0.999499
Ccne2	55.1174	-0.26372	0.196522	-1.34194	0.179617	0.999499
Ccng1	74.5613	0.0437991	0.152882	0.28649	0.774503	0.999499
Ccng2	46.5466	0.230848	0.358149	0.644558	0.519214	0.999499
Ccnh	118.173	0.185973	0.151698	1.22594	0.220221	0.999499
Ccni	404.785	-0.0210412	0.118057	-0.178229	0.858543	0.999499
Ccnjl	35.4419	0.0470375	0.287346	0.163696	0.86997	0.999499
Ccnk	111.018	-0.0547295	0.282392	-0.193807	0.846327	0.999499
Ccnl1	307.135	0.0025123	0.119308	0.0210572	0.9832	0.999499
Ccnl2	280.909	0.198201	0.187612	1.05644	0.290765	0.999499
Ccnt1	247.835	0.0672573	0.114073	0.589601	0.555458	0.999499
Ccnt2	277.66	-0.238957	0.171572	-1.39275	0.163695	0.999499
Ccny	106.582	-0.0228383	0.106695	-0.214051	0.830507	0.999499
Ccnyl1	14.5516	0.0108234	0.252105	0.0429322	0.965756	0.999499
Ccp110	66.7516	0.162972	0.188916	0.862667	0.388321	0.999499
Ccpg1	81.4198	-0.0603249	0.159356	-0.378555	0.705018	0.999499
Ccrn4l	30.542	-0.0289153	0.244088	-0.118463	0.905701	0.999499
Ccs	33.7056	-0.156414	0.188165	-0.831259	0.405827	0.999499
Ccsap	60.3788	0.445802	0.274735	1.62266	0.104662	0.999499
Ccser1	38.6076	-0.175367	0.219581	-0.798644	0.424497	0.999499
Ccser2	238.165	-0.1318	0.149006	-0.884526	0.376413	0.999499
Cct2	211.219	-0.0322008	0.201829	-0.159545	0.87324	0.999499
Cct3	246.751	0.139189	0.127293	1.09345	0.274196	0.999499
Cct4	146.588	-0.0236068	0.202157	-0.116775	0.907039	0.999499
Cct5	201.179	0.0478624	0.102077	0.468886	0.639151	0.999499
Cct6a	57.0727	0.12655	0.204012	0.620306	0.535057	0.999499
Cct7	618.516	0.131352	0.185977	0.706283	0.480012	0.999499
Ccz1	105.614	0.0229936	0.158643	0.144939	0.884759	0.999499
Cd151	97.3071	-0.0180914	0.176392	-0.102564	0.918309	0.999499
Cd164	99.3024	-0.179391	0.239483	-0.749077	0.453811	0.999499
Cd200	60.1424	0.196516	0.224876	0.873883	0.382182	0.999499
Cd24a	18.5878	-0.0384468	0.317244	-0.12119	0.903541	0.999499
Cd2ap	84.2516	-0.039134	0.238619	-0.164002	0.869729	0.999499
Cd2bp2	82.5544	-0.134258	0.17683	-0.75925	0.447703	0.999499
Cd320	29.7771	0.204434	0.344554	0.593329	0.552961	0.999499
Cd34	34.4145	0.57993	0.253291	2.28958	0.0220455	0.999499
Cd38	15.8945	0.0566788	0.39436	0.143724	0.885719	0.999499
Cd3eap	37.9081	0.0770828	0.223212	0.345335	0.729843	0.999499
Cd44	26.1071	0.488182	0.39692	1.22992	0.218725	0.999499
Cd47	901.023	0.0801778	0.137513	0.583057	0.559855	0.999499
Cd59a	126.85	-0.100207	0.209818	-0.47759	0.632942	0.999499
Cd63	591.231	-0.137648	0.156735	-0.878223	0.379823	0.999499
Cd63-ps	40.5107	-0.0210504	0.253317	-0.0830991	0.933773	0.999499
Cd81	830.683	-0.0892501	0.122876	-0.726341	0.46763	0.999499
Cd82	16.8513	-0.0639837	0.308295	-0.20754	0.835588	0.999499
Cd83	47.8807	-0.151035	0.223115	-0.67694	0.498444	0.999499
Cd9	46.5342	0.459487	0.282888	1.62427	0.104318	0.999499
Cd93	25.9973	0.65313	0.328791	1.98646	0.0469825	0.999499
Cd97	20.1626	0.379417	0.349141	1.08671	0.277163	0.999499
Cd99l2	199.489	-0.0131906	0.146036	-0.0903246	0.928029	0.999499
Cdadc1	48.04	0.0449678	0.139435	0.322501	0.747073	0.999499
Cdan1	17.0859	-0.156345	0.256069	-0.610558	0.541492	0.999499
Cdc123	136.929	-0.0640823	0.132497	-0.483651	0.628633	0.999499
Cdc14a	14.6308	0.159174	0.369071	0.431283	0.666263	0.999499
Cdc14b	82.1091	0.00638932	0.133792	0.0477554	0.961911	0.999499
Cdc16	58.8527	0.152053	0.157984	0.962457	0.33582	0.999499
Cdc23	73.5871	0.119516	0.12559	0.951641	0.341279	0.999499
Cdc25a	77.3549	-0.0499207	0.147873	-0.337591	0.735671	0.999499
Cdc25b	46.6541	-0.685722	0.259718	-2.64026	0.0082843	0.999499
Cdc26	21.4658	-0.08777	0.359612	-0.244068	0.807178	0.999499
Cdc27	96.9579	-0.0580802	0.155792	-0.372805	0.709293	0.999499
Cdc34	54.9527	0.145609	0.137882	1.05604	0.29095	0.999499
Cdc37	200.578	0.224806	0.143205	1.56982	0.116457	0.999499
Cdc37l1	516.244	-0.0716525	0.0957793	-0.7481	0.4544	0.999499
Cdc40	79.8235	0.0531251	0.182114	0.291713	0.770506	0.999499
Cdc42	590.614	0.10443	0.113383	0.921035	0.357032	0.999499
Cdc42bpa	894.002	-0.164921	0.13306	-1.23945	0.215179	0.999499
Cdc42bpb	145.409	0.0535253	0.167387	0.319771	0.749142	0.999499
Cdc42bpg	68.4396	0.0127543	0.268053	0.047581	0.96205	0.999499
Cdc42ep1	38.2128	0.338047	0.3443	0.981837	0.32618	0.999499
Cdc42ep2	59.3802	0.0820913	0.205467	0.399535	0.689499	0.999499
Cdc42ep3	27.0295	0.483807	0.343623	1.40796	0.159143	0.999499
Cdc42ep4	224.775	-0.29733	0.262401	-1.13311	0.257166	0.999499
Cdc42se1	116.489	0.327286	0.153599	2.13079	0.0331066	0.999499
Cdc42se2	98.2843	0.0943706	0.159683	0.590986	0.55453	0.999499
Cdc5l	188.551	-0.0887158	0.168255	-0.52727	0.598006	0.999499
Cdc7	47.7834	0.212562	0.29758	0.714302	0.47504	0.999499
Cdc73	222.58	-0.022325	0.115693	-0.192967	0.846984	0.999499
Cdca4	21.9374	0.186888	0.330631	0.565247	0.571906	0.999499
Cdh1	30.2815	-0.258929	0.253265	-1.02236	0.306609	0.999499
Cdh10	35.2155	-0.115009	0.373025	-0.308315	0.757842	0.999499
Cdh11	35.5097	0.191253	0.231717	0.825374	0.409159	0.999499
Cdh12	26.1519	0.361218	0.233974	1.54384	0.122627	0.999499
Cdh13	135.251	0.31979	0.21396	1.49462	0.135013	0.999499
Cdh15	43.9541	0.0147901	0.280603	0.0527084	0.957964	0.999499
Cdh18	42.6283	0.117479	0.193464	0.60724	0.543692	0.999499
Cdh19	12.9847	-0.0688335	0.3127	-0.220126	0.825773	0.999499
Cdh2	75.6239	0.131437	0.149192	0.880989	0.378324	0.999499
Cdh20	34.2058	-0.0297499	0.25366	-0.117282	0.906636	0.999499
Cdh22	113.322	0.119143	0.22538	0.528631	0.597061	0.999499
Cdh4	81.9746	0.434634	0.171677	2.5317	0.0113511	0.999499
Cdh5	19.2088	0.4097	0.411057	0.9967	0.31891	0.999499
Cdh7	212.775	0.101725	0.229783	0.442699	0.657983	0.999499
Cdh8	74.4329	-0.132221	0.203564	-0.64953	0.515996	0.999499
Cdip1	346.721	0.148616	0.122917	1.20907	0.226634	0.999499
Cdipt	135.7	-0.156989	0.147104	-1.06719	0.285884	0.999499
Cdk10	58.4964	0.0709789	0.204008	0.347921	0.727899	0.999499
Cdk11b	295.451	-0.013233	0.110606	-0.119641	0.904768	0.999499
Cdk12	227.902	-0.0634329	0.145987	-0.434509	0.663918	0.999499
Cdk13	209.907	-0.0113315	0.12313	-0.0920286	0.926675	0.999499
Cdk14	319.454	-0.101058	0.173726	-0.581709	0.560762	0.999499
Cdk16	455.471	-0.0314108	0.173243	-0.18131	0.856124	0.999499
Cdk17	160.408	0.0967913	0.160532	0.60294	0.546549	0.999499
Cdk18	27.002	-0.028965	0.275841	-0.105006	0.916371	0.999499
Cdk19	521.633	0.155425	0.172777	0.899571	0.368348	0.999499
Cdk20	28.0153	-0.028778	0.264931	-0.108625	0.9135	0.999499
Cdk2ap1	35.4977	-0.363406	0.232987	-1.55977	0.118814	0.999499
Cdk2ap2	64.1694	0.08928	0.200956	0.444276	0.656843	0.999499
Cdk4	32.5725	0.342349	0.242653	1.41086	0.158286	0.999499
Cdk5	149.106	0.0561891	0.0972048	0.578049	0.563231	0.999499
Cdk5r1	612.922	0.0275597	0.0979027	0.281501	0.778326	0.999499
Cdk5r2	453.872	0.149756	0.139865	1.07072	0.284296	0.999499
Cdk5rap1	38.496	0.0886934	0.254068	0.349093	0.727019	0.999499
Cdk5rap2	131.983	0.0171586	0.168284	0.101962	0.918787	0.999499
Cdk5rap3	22.8136	-0.0534567	0.254189	-0.210303	0.833431	0.999499
Cdk7	117.282	0.176238	0.128687	1.36951	0.170838	0.999499
Cdk8	45.5153	-0.207652	0.238183	-0.871816	0.383309	0.999499
Cdk9	36.1007	0.179753	0.219616	0.818485	0.413081	0.999499
Cdkal1	90.2186	0.118098	0.136494	0.865224	0.386916	0.999499
Cdkl1	122.88	0.0153278	0.143432	0.106865	0.914896	0.999499
Cdkl2	70.9432	-0.192378	0.16375	-1.17483	0.240064	0.999499
Cdkl3	42.7629	0.384787	0.227498	1.69139	0.0907633	0.999499
Cdkl5	41.5994	-0.106694	0.251674	-0.423939	0.671611	0.999499
Cdkn1a	115.551	0.358905	0.209282	1.71494	0.0863569	0.999499
Cdkn1b	390.987	-0.228326	0.216784	-1.05324	0.29223	0.999499
Cdkn1c	30.3059	-0.545456	0.233696	-2.33405	0.0195934	0.999499
Cdkn2aip	30.0659	0.21142	0.304063	0.695316	0.486857	0.999499
Cdkn2aipnl	93.6713	0.308315	0.225738	1.36581	0.171999	0.999499
Cdkn2d	109.372	-0.117569	0.218564	-0.537918	0.590634	0.999499
Cdo1	33.636	0.112662	0.272296	0.413747	0.679059	0.999499
Cdon	30.7195	-0.488377	0.235005	-2.07815	0.0376953	0.999499
Cdr2	58.4534	0.00694988	0.188466	0.036876	0.970584	0.999499
Cdr2l	98.8159	-0.0862895	0.143178	-0.602673	0.546726	0.999499
Cds1	301.528	-0.0706043	0.140469	-0.502632	0.615223	0.999499
Cds2	368.274	-0.147898	0.211443	-0.699471	0.484258	0.999499
Cdyl2	112.843	-0.0319653	0.20784	-0.153798	0.877769	0.999499
Cebpa	14.1844	0.0769483	0.28012	0.274697	0.783549	0.999499
Cebpg	118.487	-0.0730915	0.18335	-0.398646	0.690154	0.999499
Cebpz	194.216	-0.14139	0.161967	-0.872955	0.382688	0.999499
Cebpzos	37.1962	0.174549	0.252517	0.691239	0.489415	0.999499
Cecr2	28.8374	-0.115883	0.231101	-0.50144	0.616062	0.999499
Cecr5	13.5373	0.355535	0.338426	1.05056	0.293463	0.999499
Cecr6	13.4191	0.149644	0.432021	0.346382	0.729056	0.999499
Celf1	604.808	-0.00750822	0.128724	-0.058328	0.953487	0.999499
Celf2	1187.69	0.128314	0.0814701	1.57498	0.115262	0.999499
Celf3	46.5837	-0.351129	0.384003	-0.914391	0.360511	0.999499
Celf4	2390.9	0.109168	0.134497	0.811675	0.416978	0.999499
Celf5	99.3891	0.122764	0.178946	0.686043	0.492686	0.999499
Celf6	40.3792	0.43125	0.205884	2.09462	0.0362046	0.999499
Celsr2	237.966	0.213638	0.146314	1.46014	0.144252	0.999499
Celsr3	150.773	0.151536	0.190997	0.793396	0.427547	0.999499
Cemip	17.3031	0.186981	0.323946	0.577199	0.563805	0.999499
Cend1	314.168	-0.0460137	0.118543	-0.388161	0.697897	0.999499
Cenpb	97.2962	0.0119318	0.169451	0.0704143	0.943864	0.999499
Cenpc1	98.0066	-0.184857	0.160965	-1.14843	0.25079	0.999499
Cenpe	15.7932	0.744099	0.518062	1.43631	0.150913	0.999499
Cenpj	23.9214	0.341485	0.238512	1.43173	0.152221	0.999499
Cenpo	14.8632	0.789034	0.578408	1.36415	0.172521	0.999499
Cenpq	15.8404	0.16091	0.406009	0.396321	0.691869	0.999499
Cenpt	13.0525	0.47586	0.350566	1.35741	0.174652	0.999499
Cenpv	56.4427	-0.187852	0.188871	-0.994606	0.319928	0.999499
Cep104	75.0654	0.175451	0.197459	0.888546	0.374247	0.999499
Cep112	17.5658	0.0619319	0.345309	0.179352	0.857661	0.999499
Cep120	113.721	-0.0279413	0.14775	-0.189112	0.850005	0.999499
Cep128	13.1496	-0.702673	0.280143	-2.50827	0.0121325	0.999499
Cep131	32.6115	-0.0470102	0.170743	-0.275327	0.783065	0.999499
Cep135	85.4234	0.118937	0.209364	0.568086	0.569977	0.999499
Cep152	27.1887	0.163754	0.241739	0.6774	0.498152	0.999499
Cep162	118.626	-0.0385533	0.112244	-0.343478	0.731239	0.999499
Cep164	48.8673	-0.0837454	0.181988	-0.460171	0.645394	0.999499
Cep170	159.481	-0.128678	0.154996	-0.830201	0.406425	0.999499
Cep170b	411.557	0.248245	0.188059	1.32004	0.186822	0.999499
Cep19	105.136	0.146617	0.149287	0.982116	0.326043	0.999499
Cep192	17.3354	0.313909	0.316805	0.99086	0.321754	0.999499
Cep250	54.6941	-0.105947	0.223119	-0.474844	0.634898	0.999499
Cep290	303.23	-0.241039	0.14357	-1.6789	0.0931724	0.999499
Cep295	111.996	-0.130025	0.14023	-0.927231	0.353807	0.999499
Cep350	274.845	-0.0178216	0.140094	-0.127212	0.898773	0.999499
Cep41	15.4273	0.392483	0.335809	1.16877	0.242496	0.999499
Cep44	19.4202	-0.0557334	0.373558	-0.149196	0.881399	0.999499
Cep57	93.0646	0.144964	0.180397	0.803582	0.421639	0.999499
Cep57l1	27.0966	0.0125609	0.20321	0.0618121	0.950712	0.999499
Cep63	45.7951	-0.219219	0.194022	-1.12987	0.258532	0.999499
Cep68	30.978	0.153463	0.300316	0.511005	0.609348	0.999499
Cep70	116.234	-0.155625	0.156746	-0.992846	0.320785	0.999499
Cep76	75.3396	0.182912	0.269048	0.679849	0.4966	0.999499
Cep78	22.1263	0.159171	0.368125	0.432384	0.665462	0.999499
Cep83	118.896	-0.130098	0.142746	-0.911397	0.362086	0.999499
Cep83os	28.8265	-0.0666092	0.208164	-0.319985	0.74898	0.999499
Cep85	24.5249	0.0680914	0.277475	0.245397	0.806149	0.999499
Cep85l	69.7855	0.157499	0.170343	0.924599	0.355174	0.999499
Cep89	30.9857	0.283019	0.222829	1.27012	0.204042	0.999499
Cep95	82.2441	-0.0638634	0.189234	-0.337484	0.735752	0.999499
Cep97	55.7082	0.0338756	0.163968	0.206599	0.836323	0.999499
Cept1	101.244	0.0325263	0.2181	0.149135	0.881447	0.999499
Cercam	19.3886	0.109954	0.259123	0.424331	0.671325	0.999499
Cerk	299.052	-0.0206844	0.15166	-0.136387	0.891515	0.999499
Cerkl	23.4309	-0.466306	0.386113	-1.20769	0.227165	0.999499
Cers2	171.218	-0.110041	0.200872	-0.547816	0.583818	0.999499
Cers4	273.762	-0.0837264	0.150933	-0.554726	0.579082	0.999499
Cers5	80.5656	0.0625281	0.147712	0.423311	0.672068	0.999499
Cers6	74.5006	-0.00795516	0.234496	-0.0339245	0.972937	0.999499
Cetn2	106.804	-0.00738442	0.123881	-0.0596088	0.952467	0.999499
Cetn3	920.617	0.0843737	0.15381	0.548557	0.583309	0.999499
Cfap20	59.8138	0.151649	0.347306	0.436645	0.662369	0.999499
Cfap36	215.293	-0.103299	0.155352	-0.664937	0.506091	0.999499
Cfap44	20.0237	0.326401	0.326538	0.999579	0.317514	0.999499
Cfap69	19.5813	-0.206963	0.231107	-0.895527	0.370505	0.999499
Cfap97	150.302	-0.0666475	0.145638	-0.457625	0.647222	0.999499
Cfdp1	258.291	0.134125	0.130027	1.03151	0.3023	0.999499
Cfh	19.2766	-0.0457588	0.364719	-0.125463	0.900157	0.999499
Cfl1	372.672	-0.193492	0.205244	-0.942741	0.345813	0.999499
Cfl2	269.533	-0.00909374	0.118967	-0.0764391	0.93907	0.999499
Cflar	59.1782	0.154908	0.182607	0.848311	0.396265	0.999499
Cfp	26.7019	0.162713	0.24246	0.671092	0.502162	0.999499
Cggbp1	234.977	0.148617	0.111987	1.32709	0.184477	0.999499
Cgn	20.8301	-0.335557	0.349249	-0.960796	0.336655	0.999499
Cgnl1	168.833	0.171705	0.165809	1.03556	0.300407	0.999499
Cgrrf1	69.5365	0.0145792	0.155252	0.0939067	0.925183	0.999499
Chadl	13.735	-0.0661562	0.320449	-0.206448	0.836441	0.999499
Champ1	84.1934	-0.0850416	0.153216	-0.555045	0.578864	0.999499
Chat	32.9484	-0.386848	0.347542	-1.1131	0.265666	0.999499
Chchd1	148.905	-0.274423	0.189642	-1.44706	0.147881	0.999499
Chchd10	1245.48	-0.143636	0.159716	-0.89932	0.368482	0.999499
Chchd2	2806.74	-0.075762	0.246643	-0.307173	0.758712	0.999499
Chchd3	131.272	0.0626572	0.139	0.450772	0.652154	0.999499
Chchd4	55.2366	-0.233369	0.208475	-1.11941	0.262966	0.999499
Chchd5	27.4199	-0.285847	0.252866	-1.13043	0.258295	0.999499
Chchd6	88.9008	0.11613	0.209433	0.554499	0.579238	0.999499
Chchd7	136.388	-0.269039	0.150048	-1.79301	0.0729708	0.999499
Chd1	201.125	-0.116937	0.123595	-0.94613	0.344082	0.999499
Chd1l	21.7299	0.183719	0.292968	0.627094	0.530598	0.999499
Chd2	382.134	-0.112298	0.0886284	-1.26706	0.205133	0.999499
Chd3	700.281	-0.0303483	0.151333	-0.20054	0.841058	0.999499
Chd3os	395.084	0.00502201	0.164085	0.0306061	0.975584	0.999499
Chd4	812.817	0.214513	0.131054	1.63683	0.101666	0.999499
Chd5	179.939	0.138899	0.180889	0.767866	0.442567	0.999499
Chd6	442.775	0.0070158	0.110547	0.0634641	0.949397	0.999499
Chd7	1499.43	-0.18917	0.175843	-1.07579	0.28202	0.999499
Chd8	388.421	-0.0445917	0.0929633	-0.47967	0.631462	0.999499
Chd9	552.082	0.0828977	0.107523	0.770976	0.440721	0.999499
Chdh	13.3985	-0.0855844	0.316314	-0.270568	0.786723	0.999499
Cherp	102.765	0.0496277	0.166839	0.297458	0.766117	0.999499
Chfr	116.753	0.0960804	0.19785	0.485623	0.627235	0.999499
Chga	401.666	0.0350237	0.138221	0.25339	0.799967	0.999499
Chgb	1492.6	0.0973738	0.110865	0.878309	0.379776	0.999499
Chic1	194.782	0.0240605	0.11862	0.202836	0.839263	0.999499
Chic2	62.0972	0.00567852	0.189896	0.0299034	0.976144	0.999499
Chid1	62.8716	0.0214705	0.194402	0.110444	0.912057	0.999499
Chil1	16.0488	0.0154183	0.269919	0.0571219	0.954448	0.999499
Chka	367.238	-0.0732104	0.119304	-0.613645	0.53945	0.999499
Chkb	88.0698	-0.244457	0.164687	-1.48438	0.137709	0.999499
Chl1	836.062	0.163636	0.133115	1.22928	0.218967	0.999499
Chm	133.926	0.0649384	0.151266	0.429299	0.667705	0.999499
Chml	31.0162	-0.00682891	0.271799	-0.0251248	0.979955	0.999499
Chmp1a	127.681	0.243406	0.296229	0.82168	0.411259	0.999499
Chmp2a	151.033	-0.114009	0.125811	-0.906194	0.364833	0.999499
Chmp2b	119.564	-0.00489305	0.108736	-0.0449992	0.964108	0.999499
Chmp3	364.092	0.0334158	0.12561	0.266029	0.790217	0.999499
Chmp4b	870.751	-0.0147251	0.0698479	-0.210817	0.83303	0.999499
Chmp5	341.306	-0.189342	0.225606	-0.839259	0.401324	0.999499
Chmp6	31.7571	-0.237087	0.224318	-1.05692	0.290548	0.999499
Chmp7	103.827	0.0378304	0.223318	0.169401	0.865481	0.999499
Chn1	385.517	0.11381	0.143844	0.791207	0.428823	0.999499
Chn2	1806.97	-0.0357782	0.226895	-0.157686	0.874704	0.999499
Chodl	28.1462	-0.321432	0.299225	-1.07422	0.282725	0.999499
Chordc1	213.082	-0.0141499	0.12481	-0.113371	0.909736	0.999499
Chp1	115.515	0.0180938	0.155647	0.116249	0.907456	0.999499
Chpf	127.707	-0.00607853	0.163802	-0.037109	0.970398	0.999499
Chpf2	58.8455	0.0326445	0.2255	0.144765	0.884896	0.999499
Chpt1	370.405	0.01661	0.136162	0.121987	0.902909	0.999499
Chrac1	41.0216	0.0101424	0.206162	0.0491962	0.960763	0.999499
Chrd	27.2024	0.0592127	0.321757	0.184029	0.85399	0.999499
Chrdl1	14.0312	0.463186	0.384478	1.20471	0.228314	0.999499
Chrm2	81.6131	0.0474584	0.181979	0.26079	0.794254	0.999499
Chrm3	42.1911	0.129424	0.330926	0.391097	0.695726	0.999499
Chrna4	55.0483	0.196653	0.300584	0.654236	0.51296	0.999499
Chrnb2	35.4588	-0.073067	0.244658	-0.298649	0.765208	0.999499
Chst1	415.942	0.245691	0.169635	1.44835	0.147518	0.999499
Chst10	142.896	0.059737	0.214408	0.278614	0.780541	0.999499
Chst12	16.2008	-0.182988	0.272843	-0.670672	0.50243	0.999499
Chst15	61.6394	-0.15362	0.189887	-0.809008	0.41851	0.999499
Chst2	169.456	0.212821	0.112973	1.88383	0.0595881	0.999499
Chst8	49.1547	-0.303866	0.211859	-1.43429	0.15149	0.999499
Chsy1	39.0417	-0.0364891	0.196534	-0.185663	0.852709	0.999499
Chtf8	205.088	0.254762	0.228043	1.11717	0.263923	0.999499
Chtop	140.569	-0.0105246	0.121327	-0.086746	0.930873	0.999499
Chuk	72.2911	-0.0110052	0.286649	-0.0383926	0.969375	0.999499
Churc1	13.9445	-0.115191	0.330231	-0.34882	0.727225	0.999499
Ciao1	44.8431	-0.00570781	0.218782	-0.026089	0.979186	0.999499
Ciapin1	119.938	-0.0170138	0.150494	-0.113053	0.909989	0.999499
Ciart	24.5769	-0.441836	0.268614	-1.64487	0.0999957	0.999499
Cib1	31.5622	0.124966	0.196089	0.637293	0.523934	0.999499
Cib2	35.0676	0.387377	0.263124	1.47222	0.140961	0.999499
Cic	164.584	0.271559	0.186568	1.45555	0.145517	0.999499
Cidea	40.6786	0.803906	0.295125	2.72395	0.00645064	0.999499
Cinp	15.1045	-0.34466	0.432073	-0.79769	0.42505	0.999499
Cipc	168.807	-0.175718	0.25288	-0.694867	0.487139	0.999499
Cir1	128.48	-0.122309	0.13474	-0.907737	0.364017	0.999499
Cirbp	164.956	-0.247803	0.152368	-1.62634	0.103876	0.999499
Cirh1a	42.712	0.0937148	0.232923	0.402342	0.687432	0.999499
Cisd1	238.96	-0.0177299	0.136018	-0.130349	0.89629	0.999499
Cisd2	168.094	0.0244284	0.154728	0.15788	0.874551	0.999499
Cisd3	159.729	0.19638	0.173143	1.13421	0.256708	0.999499
Cit	764.66	0.0712463	0.0940121	0.757842	0.448546	0.999499
Cited2	175.437	-0.101096	0.194707	-0.51922	0.603607	0.999499
Cited4	16.0362	0.0316965	0.329033	0.0963323	0.923257	0.999499
Ciz1	64.031	0.0514439	0.182658	0.281641	0.778219	0.999499
Ckap4	116.79	0.043223	0.151883	0.28458	0.775966	0.999499
Ckap5	364.9	0.106448	0.146914	0.724559	0.468723	0.999499
Ckb	3663.92	0.166905	0.177273	0.941517	0.34644	0.999499
Ckmt1	384.183	0.263751	0.199383	1.32283	0.18589	0.999499
Clasp2	647.709	-0.0635819	0.0981773	-0.647623	0.517229	0.999499
Clasrp	99.8585	-0.129226	0.157386	-0.821076	0.411603	0.999499
Clcc1	167.581	0.245003	0.184719	1.32635	0.184723	0.999499
Clcn1	58.4253	0.0407331	0.293055	0.138995	0.889454	0.999499
Clcn2	26.9811	-0.0287893	0.408263	-0.0705164	0.943783	0.999499
Clcn3	777.553	0.0163062	0.091988	0.177264	0.859301	0.999499
Clcn4-2	351.588	-0.144681	0.113978	-1.26937	0.204309	0.999499
Clcn5	104.26	0.0906378	0.133196	0.680486	0.496197	0.999499
Clcn6	86.0739	-0.0773207	0.174775	-0.442402	0.658198	0.999499
Clcn7	43.1602	-0.197618	0.199463	-0.99075	0.321808	0.999499
Cldn10	86.6332	-0.121554	0.234012	-0.519438	0.603456	0.999499
Cldn11	223.912	-0.102193	0.160503	-0.636702	0.524319	0.999499
Cldn12	51.758	-0.203615	0.215465	-0.945	0.344659	0.999499
Cldn25	154.72	0.164271	0.164335	0.999611	0.317499	0.999499
Cldn5	28.7716	0.523279	0.315337	1.65943	0.0970291	0.999499
Clec16a	100.524	0.131127	0.183255	0.715545	0.474272	0.999499
Clec2l	88.5346	0.0478444	0.174543	0.274113	0.783997	0.999499
Clec3b	32.2956	-0.570487	0.381247	-1.49637	0.134557	0.999499
Clgn	80.5958	0.206812	0.270343	0.765	0.444272	0.999499
Clic1	36.5697	0.389528	0.29141	1.3367	0.18132	0.999499
Clic4	187.463	0.139788	0.201769	0.692814	0.488426	0.999499
Clic6	69.216	0.746835	0.302532	2.46861	0.0135637	0.999499
Clint1	175.191	-0.0514316	0.152638	-0.336953	0.736153	0.999499
[truncated: 21,836 more rows]

## Sheet: WT_U_vs_WT_T
Gene	baseMean	log2FoldChange	lfcSE	stat	pvalue	padj
Hspa1b	27.3954	2.86067	0.430968	6.63778	3.18e-11	7.7e-07
Hspa1a	60.3576	1.53874	0.316842	4.8565	1.19e-06	0.0144517
Fosl2	63.7187	1.17796	0.249421	4.72277	2.33e-06	0.0187608
Actn1	237.337	0.521461	0.113715	4.58569	4.52e-06	0.0273651
Tm6sf2	28.691	1.33135	0.30462	4.37053	1.24e-05	0.0599678
Pdia6	423.486	0.567489	0.136921	4.14465	3.4e-05	0.137216
Lrfn4	37.501	0.773426	0.19223	4.02345	5.74e-05	0.1982
5430400D12Rik	21.1148	-1.07211	0.277063	-3.86955	0.000109037	0.329715
Per2	179.17	0.725586	0.190554	3.80777	0.000140225	0.376909
Irs1	124.788	0.567296	0.150385	3.77229	0.000161755	0.391303
Nr4a3	93.257	1.36921	0.368507	3.71556	0.000202751	0.394146
Hykk	24.8111	-0.927137	0.250106	-3.70697	0.000209752	0.394146
Gm21984	62.1043	-0.94682	0.255733	-3.70237	0.000213592	0.394146
Coil	92.3434	-0.642479	0.174318	-3.68567	0.000228103	0.394146
Tmed4	201.172	0.444677	0.124799	3.56315	0.000366437	0.563176
Hoxb8	4.51432	-3.26382	0.919387	-3.55	0.000385236	0.563176
Trmt112-ps2	2.23241	3.53593	0.9989	3.53983	0.000400389	0.563176
Rnf38	70.6651	0.585264	0.166321	3.51888	0.000433365	0.563176
Hnrnpa2b1	962.82	0.353864	0.101104	3.49999	0.000465279	0.563176
Nup35	33.3368	0.800116	0.228618	3.4998	0.000465607	0.563176
Cep131	49.5199	-0.498072	0.143163	-3.47906	0.000503169	0.577135
Pcbp2	748.74	0.438574	0.126473	3.46774	0.000524864	0.577135
Sdc3	337.576	0.428551	0.124353	3.44625	0.000568427	0.595408
Rap1b	194.943	0.43117	0.125876	3.42535	0.000613998	0.595408
Zfp592	151.107	-0.784401	0.229159	-3.42296	0.000619443	0.595408
Mettl3	51.1936	0.621177	0.18237	3.40614	0.00065888	0.595408
Pspc1	265.562	-0.396948	0.117086	-3.39024	0.000698319	0.595408
Alas2	37.7166	-0.707218	0.208634	-3.38975	0.000699559	0.595408
Plxnb3	44.3085	0.710283	0.20988	3.38423	0.00071377	0.595408
Fam117a	63.3163	0.72653	0.215734	3.36772	0.000757931	0.61117
Manf	198.7	0.607261	0.181496	3.34587	0.000820257	0.63654
Lonp2	349.868	-0.349525	0.104692	-3.3386	0.000842018	0.63654
Xbp1	316.825	0.597219	0.179997	3.31794	0.000906832	0.639849
Ccdc23	41.46	0.638163	0.192457	3.31587	0.000913587	0.639849
RP24-546N2,4	74.0497	-0.587883	0.177602	-3.31011	0.000932588	0.639849
Cast	77.238	-0.580515	0.175806	-3.30202	0.000959919	0.639849
Racgap1	53.8212	0.548305	0.166501	3.29311	0.000990843	0.639849
Klf2	131.241	0.723893	0.220089	3.2891	0.00100509	0.639849
Map1a	5384.93	-0.404526	0.123736	-3.26926	0.00107829	0.665523
Tnfrsf11a	14.483	1.17816	0.361197	3.26182	0.00110698	0.665523
Cep290	556.859	-0.350244	0.107762	-3.25017	0.00115338	0.665523
Syt10	21.8452	-0.929891	0.286552	-3.24511	0.00117407	0.665523
Rgs16	49.1006	0.823649	0.254218	3.23993	0.00119561	0.665523
Tram2	5.82586	-1.31673	0.406852	-3.2364	0.00121049	0.665523
1700016P03Rik	10.3451	1.7293	0.536693	3.22214	0.00127236	0.683364
Zfp939	14.2361	1.00954	0.313915	3.21596	0.00130011	0.683364
Epn3	39.9205	-0.685408	0.213649	-3.2081	0.00133617	0.683364
RP24-429G21,3	48.9649	-0.659851	0.205954	-3.20387	0.00135594	0.683364
Cnn3	329.893	0.335545	0.105099	3.19267	0.00140966	0.69594
Mmadhc	201.821	0.330961	0.10477	3.15892	0.00158354	0.749153
Ddit4	367.101	0.629936	0.199701	3.15439	0.00160831	0.749153
Gm19461	5.38152	-1.62239	0.51496	-3.15051	0.00162983	0.749153
Prorsd1	67.3151	-0.479638	0.152341	-3.14846	0.00164132	0.749153
Uckl1	87.5217	0.719479	0.229198	3.13911	0.0016946	0.757704
Zfp804a	176.618	-0.452731	0.144488	-3.13335	0.00172824	0.757704
Trim9	629.92	0.365515	0.11715	3.12007	0.00180808	0.757704
Socs7	1082.01	0.387508	0.124398	3.11508	0.00183897	0.757704
1700102P08Rik	7.79391	1.83392	0.589423	3.11138	0.00186214	0.757704
Gm6501	20.0225	-0.93229	0.299765	-3.11007	0.00187042	0.757704
Isl1	4.59536	-1.77941	0.573097	-3.1049	0.00190341	0.757704
Slc30a4	172.515	0.426364	0.137715	3.096	0.00196153	0.757704
Hoxd3	5.80116	-2.33386	0.753915	-3.09566	0.00196376	0.757704
Fam186b	3.93868	2.55143	0.827289	3.08408	0.0020418	0.757704
Rcc2	378.297	0.419614	0.136309	3.0784	0.00208115	0.757704
Rasl11a	4.01541	2.96483	0.963552	3.07697	0.00209113	0.757704
Notumos	2.11289	3.4402	1.11876	3.075	0.00210499	0.757704
Serpinh1	30.832	1.16701	0.379675	3.07371	0.00211413	0.757704
Eea1	896.356	-0.393751	0.128427	-3.06595	0.00216982	0.757704
Gm12940	43.3217	0.891753	0.291295	3.06134	0.00220351	0.757704
Nefm	2576.86	-0.533018	0.174132	-3.061	0.00220601	0.757704
Rft1	36.6099	-0.722356	0.236358	-3.05619	0.00224165	0.757704
Prex1	191.469	0.463993	0.15191	3.05439	0.00225516	0.757704
Itsn2	319.863	-0.356862	0.117243	-3.04379	0.00233621	0.77418
Mapk10	1412.12	-0.34096	0.112307	-3.03597	0.0023976	0.775763
Ccdc117	76.0764	0.594643	0.196208	3.03068	0.00244006	0.775763
Zcchc9-ps	38.3914	-0.574223	0.189512	-3.03001	0.00244549	0.775763
Gm14480	19.687	-1.1016	0.363974	-3.0266	0.00247323	0.775763
Slc41a3	145.013	0.604854	0.200158	3.02189	0.00251203	0.775763
Ring1	38.5874	0.703751	0.233128	3.01872	0.00253841	0.775763
Aspa	105.392	-0.473591	0.157052	-3.01551	0.00256546	0.775763
Gm26703	9.05671	-1.10932	0.369101	-3.00545	0.00265187	0.791991
Cirbp	293.526	-0.402965	0.13446	-2.99692	0.0027272	0.804558
Gm25363	4.12538	-2.11849	0.712987	-2.97129	0.00296554	0.86433
Ppp4r1	86.6647	0.449188	0.151485	2.96524	0.00302446	0.871009
Zglp1	3.29848	2.78222	0.942043	2.95339	0.00314301	0.878494
Gm26606	9.87647	-1.28571	0.436056	-2.94851	0.00319313	0.878494
Creb3l1	21.407	1.18386	0.402111	2.94411	0.00323886	0.878494
Prrc2c	1912.7	-0.373954	0.127326	-2.93698	0.00331421	0.878494
Zc3h6	277.186	-0.357859	0.122063	-2.93175	0.0033706	0.878494
Nfyb	303.342	-0.297522	0.101573	-2.92913	0.0033991	0.878494
Dtx1	223.909	0.307019	0.104942	2.9256	0.00343791	0.878494
Hba-a1	2104.35	-0.7704	0.264298	-2.91489	0.00355814	0.878494
Gm15542	15.9878	-1.1293	0.388346	-2.90798	0.00363767	0.878494
Rbm12b1	13.5764	1.03753	0.356864	2.90735	0.00364505	0.878494
Gm6245	7.18642	-1.36159	0.468962	-2.90341	0.00369123	0.878494
RP24-186G5,2	159.451	-0.632292	0.218124	-2.89878	0.0037462	0.878494
Dnajc21	327.232	-0.41155	0.142131	-2.89557	0.00378468	0.878494
Plxdc1	119.585	0.480851	0.166124	2.89454	0.00379714	0.878494
D430018E03Rik	11.8322	-1.13717	0.393307	-2.89129	0.0038366	0.878494
Vipr1	12.2028	-1.31501	0.455187	-2.88893	0.0038655	0.878494
Gm19815	4.30016	-2.17906	0.754972	-2.88628	0.00389825	0.878494
Ilkap	269.446	0.356974	0.1237	2.8858	0.00390415	0.878494
Gla	50.0579	-0.629269	0.2181	-2.88523	0.0039113	0.878494
Derl2	102.718	0.394564	0.136789	2.88447	0.00392073	0.878494
Map1b	6470.85	-0.405194	0.140568	-2.88254	0.00394486	0.878494
Gm3604	1.50114	-2.85021	0.988943	-2.88208	0.00395061	0.878494
Trp53i13	12.3343	1.0454	0.363154	2.87867	0.00399357	0.878494
Npr3	9.61083	-1.28636	0.447129	-2.87693	0.00401561	0.878494
Xpot	147.082	0.330686	0.115191	2.87078	0.00409467	0.878494
Gm13422	14.7587	-1.1354	0.395518	-2.87067	0.00409607	0.878494
Cdc42se1	231.845	0.339966	0.118455	2.87001	0.00410459	0.878494
Rufy2	677.094	-0.339953	0.118451	-2.86998	0.00410497	0.878494
Adam8	9.39265	1.27591	0.444708	2.8691	0.00411636	0.878494
Slc39a1	92.9387	0.564211	0.196833	2.86645	0.00415103	0.878494
Arhgef4	280.182	-0.360992	0.126021	-2.86454	0.00417622	0.878494
Arap1	86.373	0.48155	0.168344	2.86052	0.00422953	0.88204
Cep83	202.553	-0.518851	0.182071	-2.84972	0.00437583	0.89913
Nkain4	76.1403	0.619789	0.217707	2.8469	0.00441473	0.89913
Tdrp	40.2658	0.567423	0.199354	2.8463	0.00442299	0.89913
A930009A15Rik	2.89702	2.79384	0.986517	2.83203	0.00462537	0.930764
Eps8l1	29.5981	1.56787	0.55436	2.82825	0.00468037	0.930764
BC035044	1.7572	3.71717	1.31473	2.82731	0.00469403	0.930764
Per1	174.844	0.521475	0.184942	2.81968	0.00480723	0.93666
Rad52	36.1256	-0.529383	0.188085	-2.81459	0.00488395	0.93666
Inhba	12.0665	-0.979363	0.348102	-2.81343	0.00490153	0.93666
Gm7536	3.28483	2.2261	0.79172	2.81173	0.00492757	0.93666
Col12a1	22.128	0.739875	0.263152	2.81158	0.00492984	0.93666
Gm13830	34.924	0.673126	0.239613	2.80922	0.00496616	0.93666
Hoxa7	1.61754	-3.11331	1.10898	-2.80737	0.00499479	0.93666
Nucks1	2767.18	-0.221433	0.0789772	-2.80375	0.00505118	0.938573
Rpgr	80.6625	-0.452154	0.161433	-2.80087	0.00509645	0.938573
Fmn1	70.0824	-0.668581	0.238839	-2.7993	0.00512139	0.938573
RP24-186G5,1	21.2667	-0.942551	0.338028	-2.78838	0.00529726	0.951137
Sdccag3	225.357	0.422426	0.151561	2.78717	0.00531705	0.951137
Lrrc16b	113.336	0.43042	0.155	2.7769	0.00548801	0.951137
Rnf170	92.4266	-0.425349	0.153484	-2.77128	0.00558355	0.951137
Pdcd10	133.183	-0.315179	0.114054	-2.76341	0.00572008	0.951137
Gm29322	5.31731	1.61396	0.585414	2.75696	0.00583415	0.951137
Glo1	737.096	0.453947	0.164695	2.7563	0.00584598	0.951137
Tcerg1	873.844	-0.255481	0.0927013	-2.75597	0.00585192	0.951137
2810455O05Rik	15.2748	1.05823	0.384012	2.75573	0.00585614	0.951137
Arhgef26	235.861	-0.34672	0.125884	-2.75428	0.00588212	0.951137
Tmf1	370.302	-0.429936	0.156275	-2.75114	0.00593879	0.951137
Rd3l	9.51537	1.16416	0.423264	2.75044	0.00595147	0.951137
Fam174b	123.923	0.381232	0.138815	2.74632	0.00602678	0.951137
Dnajc10	331.72	-0.230635	0.0840106	-2.74531	0.00604534	0.951137
Trim67	189.362	0.516718	0.188274	2.7445	0.00606036	0.951137
Ece1	441.436	0.396619	0.144818	2.73873	0.00616763	0.951137
Herpud1	358.709	0.386015	0.140977	2.73815	0.00617857	0.951137
Arl14ep	168.513	0.384051	0.140279	2.73776	0.00618589	0.951137
Ndnf	42.6106	-0.496696	0.181701	-2.73359	0.00626483	0.951137
Jup	243.631	0.497313	0.18203	2.73203	0.00629456	0.951137
Amer1	91.0903	-0.453492	0.166164	-2.72919	0.00634905	0.951137
Dnajb1	319.887	0.612213	0.224398	2.72824	0.00636726	0.951137
Slc31a2	68.0584	0.644814	0.236368	2.72801	0.00637184	0.951137
Nr2c2	922.845	-0.300905	0.110377	-2.72616	0.00640751	0.951137
RP24-540L1,2	97.4651	-0.450734	0.165427	-2.72467	0.00643657	0.951137
Nfkbia	636.08	0.367087	0.134731	2.72459	0.00643817	0.951137
Morf4l1	471.788	-0.484451	0.177819	-2.72441	0.0064417	0.951137
Gm10116	8.20933	1.3761	0.505439	2.72259	0.0064773	0.951137
Nell1	125.108	0.482556	0.177405	2.72009	0.00652644	0.951137
Hyou1	208.788	0.335398	0.123308	2.72	0.00652811	0.951137
Numbl	189.087	0.380257	0.139853	2.71898	0.00654831	0.951137
Cacul1	204.216	0.416175	0.153083	2.71863	0.00655535	0.951137
Rasa4	103.218	0.390306	0.143575	2.71848	0.00655835	0.951137
2010-09-01	32.0276	-0.643139	0.236742	-2.71663	0.00659506	0.951137
Cd9	98.4727	0.558828	0.205809	2.71527	0.00662217	0.951137
Pacsin1	2080.57	0.346516	0.127671	2.71413	0.00664495	0.951137
Tmem140	15.8999	0.991228	0.36547	2.7122	0.00668379	0.951137
Jph3	398.545	0.273427	0.100814	2.71219	0.00668402	0.951137
Acaa1b	2.85265	-1.97266	0.727924	-2.70999	0.00672859	0.951879
Gm14630	1.30274	3.37336	1.24639	2.7065	0.00679968	0.956343
Dusp14	55.9974	0.48921	0.181058	2.70195	0.00689336	0.960222
Gm11448	5.02329	-1.5862	0.58745	-2.70014	0.00693111	0.960222
Gpr116	135.758	-0.447109	0.165851	-2.69584	0.0070211	0.960222
Nars	1257.58	-0.252019	0.0935282	-2.69458	0.00704769	0.960222
Slc35f3	149.982	-0.411571	0.152745	-2.6945	0.00704935	0.960222
Nr2f2	295.542	-0.357076	0.132557	-2.69375	0.00706542	0.960222
Nefh	1561.33	-0.425229	0.158046	-2.69054	0.00713354	0.962436
Zfp326	410.454	-0.274873	0.102218	-2.68909	0.00716468	0.962436
Shisa7	26.6475	0.789456	0.293762	2.6874	0.00720106	0.962436
Tmem156	1.76157	3.73268	1.39155	2.6824	0.00730963	0.964676
Dcun1d3	44.507	0.636158	0.238164	2.6711	0.0075604	0.964676
Elavl1	150.331	0.317912	0.119134	2.66851	0.00761883	0.964676
Ddx52	283.724	-0.303269	0.11375	-2.6661	0.00767361	0.964676
Sema7a	387.38	0.332303	0.124696	2.6649	0.00770111	0.964676
Sars	698.853	-0.345339	0.129595	-2.66475	0.00770454	0.964676
Bub1b	3.04824	3.29153	1.23631	2.66238	0.00775913	0.964676
Dapp1	2.40305	2.5244	0.948437	2.66164	0.00777605	0.964676
Dnajb11	186.555	0.433386	0.163112	2.65698	0.00788438	0.964676
Zc3h8	40.6851	-0.489797	0.184395	-2.65624	0.00790181	0.964676
Cntln	326.008	-0.3521	0.132559	-2.65617	0.00790337	0.964676
Nefl	3487.41	-0.419029	0.15777	-2.65594	0.00790872	0.964676
Epb4,1l3	763.062	-0.277973	0.104873	-2.65057	0.00803565	0.964676
Rarb	33.4453	0.666121	0.251349	2.65018	0.00804482	0.964676
Lamtor1	315.694	0.362394	0.136801	2.64907	0.00807141	0.964676
Srrm2	6959.46	-0.279995	0.10574	-2.64794	0.00809836	0.964676
Gm10343	3.70315	1.66569	0.629176	2.64742	0.0081109	0.964676
Tfrc	254.357	-0.330048	0.124782	-2.64501	0.00816889	0.964676
Atxn7l3b	1530.48	0.235841	0.0892896	2.64131	0.00825862	0.964676
A930005H10Rik	95.7563	0.410354	0.155385	2.64088	0.00826912	0.964676
Med14	146.707	0.346398	0.131248	2.63925	0.00830886	0.964676
H2afv	337.54	0.414641	0.15714	2.63868	0.00832305	0.964676
Itpka	150.396	0.5609	0.212571	2.63865	0.00832363	0.964676
RP23-416H10,6	24.4585	-0.737977	0.279836	-2.63718	0.0083599	0.964676
Spns1	89.1421	0.448307	0.170177	2.63436	0.00842956	0.964676
Plekha5	478.037	-0.514267	0.19528	-2.63349	0.00845127	0.964676
Ehd3	618.356	-0.255818	0.0973447	-2.62796	0.00858978	0.964676
A530053G22Rik	1.37842	-4.04751	1.54065	-2.62714	0.00861061	0.964676
Nek9	146.258	-0.34233	0.130314	-2.62697	0.00861498	0.964676
Prkaa1	108.765	-0.37513	0.142833	-2.62635	0.00863068	0.964676
Fam114a2	282.059	0.341127	0.129921	2.62565	0.00864837	0.964676
Txnrd1	271.175	-0.306917	0.116897	-2.62552	0.00865155	0.964676
Psenen	13.1367	1.04357	0.39749	2.6254	0.00865472	0.964676
Mgme1	59.3678	0.527413	0.201022	2.62365	0.00869925	0.964676
Rfc1	412.908	-0.255427	0.0973633	-2.62344	0.00870462	0.964676
Igdcc4	190.14	0.386083	0.147175	2.62329	0.00870861	0.964676
Msi1	160.289	0.302861	0.115466	2.62295	0.00871728	0.964676
Prpf40a	630.117	-0.270606	0.103279	-2.62015	0.00878915	0.964676
Nubpl	16.6339	-0.790776	0.301834	-2.61991	0.00879538	0.964676
Lox	4.94692	1.82252	0.695824	2.61923	0.00881292	0.964676
B630019A10Rik	2.2534	3.34959	1.28133	2.61415	0.00894506	0.972389
RP23-82P18,4	30.6168	-0.723362	0.276786	-2.61343	0.00896378	0.972389
Cep128	27.7455	-0.66551	0.254847	-2.61141	0.00901703	0.973684
Rab11fip4	348.623	0.270177	0.103519	2.60992	0.00905622	0.973684
Ndufa7	494.74	0.242812	0.0931338	2.60713	0.00913055	0.977332
Mtfr1	27.0259	0.701838	0.269395	2.60524	0.00918091	0.978394
RP23-34E15,5	2.08166	-2.03863	0.785179	-2.59639	0.00942093	0.99457
Birc3	4.63617	1.82199	0.702062	2.5952	0.00945371	0.99457
Fuk	54.0038	0.51644	0.199005	2.59511	0.00945604	0.99457
Nfs1	124.696	0.394618	0.152447	2.58856	0.00963778	0.998732
2700099C18Rik	1.99444	-2.79169	1.07859	-2.58829	0.00964541	0.998732
Pfn4	10.6873	-1.04904	0.405369	-2.58788	0.00965699	0.998732
Gm10222	16.3456	-0.779003	0.301133	-2.5869	0.00968424	0.998732
Ccdc106	57.1858	0.506268	0.195784	2.58585	0.00971387	0.998732
Rnf113a1	26.7724	0.694652	0.26887	2.5836	0.00977744	0.998732
Atl2	406.309	0.342783	0.132707	2.58301	0.00979427	0.998732
Ly6k	1.85836	3.24979	1.26015	2.57889	0.00991194	0.998732
RP24-287C2,1	7.19934	-1.05594	0.409983	-2.57558	0.0100073	0.998732
Gse1	195.719	0.374572	0.145472	2.57487	0.0100277	0.998732
Tax1bp1	1232.84	-0.216431	0.0841153	-2.57303	0.0100813	0.998732
Gm12396	5.87232	1.52144	0.59145	2.57239	0.0100999	0.998732
Tmem159	19.0041	0.645723	0.251127	2.5713	0.0101317	0.998732
RP24-338G10,1	12.1821	-0.853637	0.332815	-2.5649	0.0103206	0.998732
Snrpe	150.425	0.449716	0.175369	2.5644	0.0103354	0.998732
Vwc2	24.3028	0.965714	0.376888	2.56234	0.0103969	0.998732
Kbtbd7	89.6195	0.457664	0.178833	2.55917	0.0104921	0.998732
Gmcl1	260.47	0.276713	0.108153	2.55853	0.0105115	0.998732
Zfp697	31.8589	0.687883	0.268884	2.55829	0.010519	0.998732
Slc12a5	1328.02	0.251713	0.0984119	2.55775	0.0105351	0.998732
Ankrd12	2595.52	-0.337073	0.131817	-2.55713	0.0105541	0.998732
Smndc1	245.292	-0.281606	0.110158	-2.55639	0.0105764	0.998732
Hpcal4	100.208	0.574513	0.225162	2.55155	0.0107245	0.998732
Atp8a2	66.7732	-0.425033	0.166751	-2.54891	0.010806	0.998732
Sox11	155.274	0.593287	0.232923	2.54714	0.010861	0.998732
Dcaf7	327.342	0.24599	0.0965908	2.54672	0.0108741	0.998732
Adcy5	139.388	0.412639	0.162138	2.54498	0.0109284	0.998732
Zdhhc4	140.501	-0.287609	0.113022	-2.54471	0.010937	0.998732
Fan1	19.274	-0.753023	0.295965	-2.5443	0.0109497	0.998732
Gm12693	153.508	-0.430458	0.169475	-2.53996	0.0110866	0.998732
Aimp1	514.146	-0.194333	0.0765159	-2.53978	0.0110924	0.998732
Rad50	202.665	-0.335312	0.132049	-2.5393	0.0111074	0.998732
Rnf44	209.026	0.269811	0.106336	2.53734	0.01117	0.998732
Gm12582	5.07215	1.64733	0.649552	2.5361	0.0112096	0.998732
Hoxb4	15.6573	-1.33401	0.527064	-2.53102	0.0113731	0.998732
RP24-222G3,2	2.56686	-2.24704	0.888012	-2.53041	0.0113928	0.998732
Rpl10-ps3	78.1134	-0.5407	0.213844	-2.52847	0.011456	0.998732
RP23-447L15,3	6.12748	-1.26203	0.49982	-2.52498	0.0115705	0.998732
Msl3	128.606	-0.379634	0.15042	-2.52383	0.0116084	0.998732
Zbtb16	42.0663	-0.613261	0.243139	-2.52227	0.0116601	0.998732
Hexa	112.431	0.452957	0.179612	2.52186	0.0116735	0.998732
Pdgfrl	15.674	1.05586	0.418792	2.52121	0.0116953	0.998732
Wdr82	277.016	0.286655	0.11376	2.51983	0.0117412	0.998732
Dlgap4	997.653	0.280366	0.111279	2.51948	0.0117528	0.998732
Clip1	1456.7	-0.334733	0.132867	-2.5193	0.0117587	0.998732
Abca7	120.15	0.43036	0.170828	2.51925	0.0117605	0.998732
Rnf126	117.931	0.341179	0.135621	2.51569	0.0118801	0.998732
Slc8a1	50.0357	-0.7062	0.280757	-2.51534	0.0118916	0.998732
Ly6c1	151.808	0.392252	0.156122	2.51246	0.0119892	0.998732
Arhgdib	17.4726	0.857323	0.341463	2.51074	0.012048	0.998732
Arl5a	54.2128	0.5042	0.200906	2.50963	0.0120857	0.998732
Mbd6	218.987	0.432951	0.172622	2.50808	0.0121388	0.998732
Fbxl14	38.536	0.920644	0.367899	2.50243	0.0123342	0.998732
Cpt1c	111.378	0.374421	0.149675	2.50157	0.0123644	0.998732
Ccdc122	19.3002	-0.731935	0.292716	-2.50049	0.012402	0.998732
Cryl1	18.0442	0.784453	0.313771	2.50008	0.0124166	0.998732
3110045C21Rik	1.2884	3.44191	1.37776	2.4982	0.0124825	0.998732
RP23-300L15,1	2.05247	-2.39136	0.958986	-2.49363	0.0126443	0.998732
Nceh1	516.341	-0.297026	0.119202	-2.49179	0.01271	0.998732
Snord13	110.856	-0.578317	0.232154	-2.4911	0.0127349	0.998732
Bod1	113.035	0.476926	0.19157	2.48957	0.0127897	0.998732
Gm6415	49.9939	0.575226	0.231154	2.48849	0.0128285	0.998732
Nup85	204.27	0.383091	0.153974	2.48803	0.0128455	0.998732
Cdc42	1209.51	0.230942	0.0928356	2.48765	0.0128592	0.998732
Cfap97	236.212	-0.351175	0.141214	-2.48683	0.0128887	0.998732
Bdnf	163.657	0.467112	0.18786	2.48649	0.0129008	0.998732
RP24-367P22,1	27.1436	-0.749536	0.301474	-2.48624	0.01291	0.998732
Synpo2	18.5223	0.759672	0.306297	2.48018	0.0131316	0.998732
Trmt1	209.406	-0.408356	0.164786	-2.4781	0.0132085	0.998732
A330074K22Rik	8.98907	-1.05376	0.425316	-2.47759	0.0132274	0.998732
Spcs2	312.541	0.398691	0.160923	2.47752	0.0132298	0.998732
Pawr	3.58838	-1.64436	0.663877	-2.47691	0.0132525	0.998732
Tmem126a	92.7645	0.340643	0.137574	2.47607	0.0132837	0.998732
Gm12743	5.61066	-1.19552	0.482936	-2.47553	0.0133039	0.998732
Snord87	8.10914	-1.22079	0.493444	-2.47402	0.0133604	0.998732
Dek	839.165	-0.33706	0.136386	-2.47137	0.0134596	0.998732
Cnrip1	372.415	0.248349	0.100529	2.47042	0.0134956	0.998732
Tcea1-ps1	133.298	-0.496918	0.201198	-2.46979	0.0135192	0.998732
Cfap53	8.50289	-1.08895	0.441305	-2.46757	0.0136035	0.998732
Lig1	267.944	-0.349372	0.141616	-2.46704	0.0136237	0.998732
Il1r1	23.6112	-0.727764	0.295081	-2.46632	0.0136509	0.998732
1810026J23Rik	146.914	0.32061	0.129998	2.46627	0.0136529	0.998732
Phox2a	4.22333	2.21618	0.899412	2.46403	0.0137383	0.998732
Chp1	186.312	-0.355574	0.144307	-2.46402	0.0137389	0.998732
Itga4	19.6502	-0.660198	0.268003	-2.4634	0.0137627	0.998732
Cd99l2	337.295	-0.298841	0.121349	-2.46267	0.0137908	0.998732
Copb1	321.833	-0.357269	0.145091	-2.46237	0.0138021	0.998732
Gm28437	407.619	-0.819464	0.332924	-2.46142	0.013839	0.998732
Cyc1	455.402	0.230879	0.0938385	2.46038	0.013879	0.998732
Pabpn1	244.957	0.419223	0.170522	2.45846	0.0139533	0.998732
Opn3	45.0628	0.683379	0.278254	2.45595	0.0140511	0.998732
Stk39	479.938	-0.30847	0.125741	-2.45321	0.0141588	0.998732
Setd5	754.903	-0.242371	0.0989012	-2.45064	0.0142604	0.998732
Abl1	118.032	0.35008	0.142956	2.44887	0.0143305	0.998732
Itpripl2	14.8099	-0.705398	0.288162	-2.44792	0.0143682	0.998732
Per3	272.994	-0.261249	0.106749	-2.44732	0.0143924	0.998732
Cryab	832.55	0.403505	0.164934	2.44646	0.0144266	0.998732
Psmb2	86.9109	0.467933	0.191288	2.44622	0.0144362	0.998732
Cck	393.376	0.354047	0.144764	2.44568	0.0144581	0.998732
Slc7a6	39.0956	0.512313	0.21001	2.43946	0.014709	0.998732
Hoxc6	3.56103	-1.88998	0.774987	-2.43872	0.0147393	0.998732
Gm17597	5.18904	-1.27527	0.522965	-2.43854	0.0147469	0.998732
Fnip2	71.2197	0.45132	0.185158	2.43748	0.0147899	0.998732
Fam220a	104.869	0.320697	0.131594	2.43702	0.0148091	0.998732
Gm26536	1.19489	3.29833	1.35528	2.43368	0.0149463	0.998732
Hoxa5	60.7106	-1.64285	0.676628	-2.428	0.0151824	0.998732
Gm20689	2.15006	-2.26922	0.934685	-2.42779	0.0151909	0.998732
2210016L21Rik	455.327	-0.270413	0.11141	-2.42719	0.0152163	0.998732
Txndc9	268.895	-0.282022	0.116275	-2.42548	0.0152882	0.998732
Slc26a3	3.25399	2.87473	1.18542	2.42508	0.0153051	0.998732
Dph3	204.262	0.218382	0.0901191	2.42326	0.0153817	0.998732
Gm13487	3.39112	-1.76548	0.728716	-2.42273	0.0154045	0.998732
Adamtsl3	5.61524	-1.27734	0.527476	-2.42162	0.0154517	0.998732
Hdac5	303.241	0.268127	0.110724	2.42159	0.0154528	0.998732
Apold1	49.3877	0.659896	0.272525	2.42142	0.0154601	0.998732
Gpr61	35.3826	-0.524707	0.216705	-2.42129	0.0154653	0.998732
Wnk1	1613.1	-0.150608	0.062229	-2.42023	0.0155107	0.998732
Slc2a12	18.5144	-0.740375	0.306019	-2.41937	0.0155473	0.998732
Zfp93	18.0211	0.872108	0.360576	2.41865	0.0155782	0.998732
Bambi	24.3465	0.772935	0.319616	2.41832	0.0155922	0.998732
Arid4b	1623.56	-0.2575	0.106482	-2.41824	0.0155956	0.998732
Tns3	130.766	0.36653	0.151582	2.41803	0.0156047	0.998732
Ubxn2a	275.076	-0.422717	0.17485	-2.4176	0.0156233	0.998732
2410006H16Rik	212.215	0.332907	0.137725	2.41718	0.0156411	0.998732
Slc19a1	51.7851	-0.467055	0.193252	-2.41681	0.0156571	0.998732
Nbea	1575.14	-0.319807	0.13233	-2.41673	0.0156608	0.998732
Ccm2	97.8074	0.440464	0.182261	2.41666	0.0156636	0.998732
Nr4a2	315.603	0.846932	0.350757	2.41458	0.0157532	0.998732
Aldh9a1	146.939	-0.314155	0.130167	-2.41347	0.0158014	0.998732
Gm13689	1.61258	3.05768	1.26725	2.41286	0.015828	0.998732
Rab20	3.08695	-1.97157	0.817222	-2.41253	0.0158424	0.998732
Ncam2	300.21	-0.444244	0.184143	-2.41249	0.015844	0.998732
Man2b2	7.12032	1.21754	0.504763	2.41211	0.0158607	0.998732
Ppp6r1	211.526	-0.328631	0.136322	-2.4107	0.0159219	0.998732
Ppp1r15a	59.8139	0.526323	0.218448	2.40937	0.0159799	0.998732
Myo6	1049.16	-0.248383	0.103113	-2.40884	0.0160034	0.998732
Npas4	11.7441	1.14971	0.477299	2.40879	0.0160054	0.998732
Iars	208.351	0.296099	0.122966	2.40798	0.016041	0.998732
Diexf	112.597	-0.318409	0.13225	-2.40762	0.0160569	0.998732
Elovl7	199.379	-0.364006	0.151191	-2.40759	0.0160582	0.998732
Zkscan16	10.9195	-1.19513	0.49669	-2.40619	0.0161201	0.998732
Ppnr	4.45968	-1.86419	0.77501	-2.40538	0.0161558	0.998732
Chtop	309.152	0.233075	0.0969064	2.40516	0.0161655	0.998732
Yipf5	364.187	0.238925	0.0993751	2.40428	0.0162045	0.998732
RP23-476G18,2	13.8635	-1.00865	0.419676	-2.40341	0.0162429	0.998732
Zfp318	513.084	-0.251457	0.104679	-2.40218	0.0162978	0.998732
Pik3r1	611.88	-0.240924	0.100321	-2.40153	0.0163267	0.998732
Scfd1	267.032	-0.280912	0.117039	-2.40017	0.0163876	0.998732
Scaper	897.986	-0.317334	0.132322	-2.3982	0.0164759	0.998732
Banp	449.846	0.347899	0.145088	2.39784	0.0164921	0.998732
Fkbp15	119.007	-0.354868	0.148111	-2.39595	0.0165773	0.998732
Zfp420	109.136	0.417696	0.174341	2.39586	0.0165815	0.998732
Lrp1	870.827	0.250082	0.104453	2.39419	0.0166569	0.998732
Asprv1	2.58063	-1.85725	0.77582	-2.39392	0.0166692	0.998732
Mccc1	95.565	-0.366633	0.153166	-2.3937	0.0166796	0.998732
Prpf4b	1835.03	-0.30596	0.127854	-2.39303	0.0167097	0.998732
Gm1848	9.70006	-0.959945	0.401182	-2.39279	0.0167207	0.998732
Phldb2	67.6819	-0.357989	0.149675	-2.39177	0.0167672	0.998732
Gm26759	2.98351	-1.69694	0.709572	-2.3915	0.0167799	0.998732
Arhgef1	82.7314	0.345731	0.144663	2.38991	0.0168524	0.998732
Ky	17.7595	0.788231	0.330082	2.38798	0.0169411	0.998732
Amdhd2	41.5362	-0.635061	0.265941	-2.38798	0.0169414	0.998732
Bag5	190.573	-0.233721	0.0978747	-2.38797	0.0169419	0.998732
Gm13680	1.32398	2.75035	1.15204	2.38736	0.0169697	0.998732
Pced1b	16.5575	0.820334	0.344037	2.38444	0.0171053	0.998732
Sema4a	84.8253	0.423907	0.177821	2.38389	0.0171306	0.998732
Lilrb4	1.88288	2.55369	1.07126	2.38382	0.0171341	0.998732
Casp8ap2	323.705	-0.359179	0.15074	-2.38278	0.0171826	0.998732
Ccnh	242.973	0.228196	0.0958949	2.37965	0.017329	0.998732
Lsmem1	6.55213	1.35754	0.570604	2.37912	0.0173539	0.998732
Akap12	622.166	-0.239063	0.100649	-2.3752	0.0175393	0.998732
Gab1	88.281	0.472102	0.198808	2.37466	0.0175652	0.998732
Dmrta2	13.0809	0.884303	0.372657	2.37297	0.0176458	0.998732
Slc29a1	65.2914	0.45093	0.19019	2.37095	0.0177423	0.998732
Acsl4	203.061	0.367053	0.154898	2.36965	0.0178048	0.998732
Dnaja2	735.948	0.228702	0.0965581	2.36855	0.0178581	0.998732
Oaz1	692.526	0.245907	0.103895	2.36688	0.0179389	0.998732
Tbcel	315.771	-0.247795	0.104769	-2.36515	0.0180227	0.998732
Zfp335	73.8994	0.44195	0.186862	2.36511	0.0180247	0.998732
Hoxa2	4.54401	-1.62962	0.689187	-2.36456	0.0180517	0.998732
Lrsam1	95.2738	-0.427884	0.180965	-2.36446	0.0180564	0.998732
2010300C02Rik	62.5149	0.485593	0.205375	2.36441	0.0180586	0.998732
Ptdss2	176.894	-0.245422	0.10381	-2.36414	0.018072	0.998732
Hmgxb4	156.821	-0.333473	0.141129	-2.3629	0.0181328	0.998732
Ibtk	190.927	-0.309626	0.131064	-2.36241	0.0181565	0.998732
Ppard	47.3748	0.503523	0.213172	2.36205	0.018174	0.998732
Kif2a	696.262	-0.262104	0.110981	-2.3617	0.0181912	0.998732
B9d1	41.8655	0.572096	0.242332	2.36079	0.0182361	0.998732
Marcks	806.694	0.31558	0.133697	2.36041	0.0182548	0.998732
Ascc1	44.8734	-0.455741	0.193082	-2.36035	0.0182577	0.998732
Brd4	774.967	-0.293639	0.124434	-2.3598	0.0182848	0.998732
Sytl5	5.78165	-1.21633	0.515756	-2.35834	0.0183571	0.998732
C1qtnf4	195.741	0.518467	0.219867	2.3581	0.018369	0.998732
Arhgap27os2	8.66699	0.966036	0.409909	2.35671	0.0184376	0.998732
Irgm2	12.1165	0.890645	0.378045	2.35592	0.0184767	0.998732
Ankhd1	1631.82	-0.332169	0.140993	-2.35592	0.018477	0.998732
Cpne9	139.015	-0.28269	0.120106	-2.35367	0.0185891	0.998732
Qser1	281.315	-0.258196	0.109751	-2.35257	0.0186443	0.998732
Scn1a	1710.82	-0.288204	0.122506	-2.35256	0.0186446	0.998732
Cyp4x1os	3.33198	1.82434	0.775601	2.35216	0.0186647	0.998732
Trub1	108.17	-0.267344	0.113706	-2.35118	0.0187142	0.998732
Becn1	371.845	0.212903	0.09057	2.3507	0.0187383	0.998732
Notch4	14.944	0.971574	0.413515	2.34955	0.018796	0.998732
A830082K12Rik	96.329	-0.407779	0.173572	-2.34933	0.018807	0.998732
Ctsw	3.78362	1.43694	0.611792	2.34875	0.0188368	0.998732
Nlgn3	257.188	-0.240751	0.102544	-2.34779	0.0188854	0.998732
Cwf19l2	367.096	-0.250274	0.106637	-2.34697	0.0189268	0.998732
Fli1	28.2553	0.611781	0.260938	2.34455	0.01905	0.998732
Cubn	2.43159	2.42258	1.03373	2.34354	0.0191017	0.998732
Tmem150a	55.3671	0.36844	0.157224	2.34341	0.0191084	0.998732
Lmnb2	110.281	0.395564	0.168831	2.34296	0.0191316	0.998732
Cnih4	249.965	-0.232341	0.0991964	-2.34223	0.0191688	0.998732
Spg21	116.545	0.371644	0.158694	2.34189	0.0191862	0.998732
Mab21l2	53.5019	-0.580698	0.248025	-2.34129	0.0192174	0.998732
Tm9sf2	403.927	0.285411	0.122028	2.33889	0.019341	0.998732
Bspry	2.56829	-1.71516	0.733563	-2.33811	0.0193813	0.998732
Prdm9	20.5939	-0.752583	0.321906	-2.33789	0.0193927	0.998732
Cd248	6.0075	-1.07401	0.459393	-2.33789	0.0193928	0.998732
Tsx	1.48678	2.95378	1.26494	2.33512	0.0195374	0.998732
Ctdspl2	219.967	-0.355056	0.152083	-2.33461	0.0195636	0.998732
Cggbp1	480.764	0.250838	0.107467	2.33409	0.0195909	0.998732
Amigo1	105.832	0.32726	0.14033	2.33208	0.0196965	0.998732
Uvssa	206.815	-0.378878	0.162493	-2.33165	0.0197189	0.998732
Usp15	178.786	-0.380949	0.1635	-2.32997	0.019808	0.998732
Mtf1	174.56	0.286199	0.122868	2.32933	0.0198417	0.998732
Hbs1l	157.465	0.309078	0.132791	2.32754	0.0199363	0.998732
RP23-415F2,1	43.2912	0.509512	0.219168	2.32476	0.0200849	0.998732
Gigyf2	521.623	-0.315827	0.135868	-2.32452	0.0200979	0.998732
Tceanc	10.5721	-1.00645	0.433062	-2.32404	0.0201231	0.998732
Mon1a	61.5639	0.515404	0.221857	2.32313	0.020172	0.998732
Edc4	129.916	0.313668	0.135054	2.32253	0.0202045	0.998732
Abcf2	83.3615	-0.582587	0.250948	-2.32154	0.0202577	0.998732
Alg6	90.1895	-0.394488	0.169975	-2.32086	0.0202942	0.998732
Arv1	25.5236	0.618925	0.266681	2.32085	0.0202951	0.998732
Uaca	50.8969	-0.398587	0.171747	-2.32077	0.020299	0.998732
Cc2d2a	289.246	-0.245471	0.105922	-2.31747	0.0204783	0.998732
Eif4e3	167.985	-0.353465	0.152592	-2.3164	0.0205362	0.998732
Prg4	36.3918	-0.678196	0.292801	-2.31624	0.0205454	0.998732
Kif5b	2963.2	-0.214769	0.0927607	-2.3153	0.0205967	0.998732
Prdm4	48.3443	0.456163	0.197072	2.3147	0.0206294	0.998732
Tnfaip2	9.33567	1.09489	0.473077	2.3144	0.0206458	0.998732
Rfwd3	34.0213	-0.642398	0.277803	-2.31242	0.0207544	0.998732
Fam46c	19.6341	-0.771393	0.333596	-2.31236	0.020758	0.998732
Car14	116.622	-0.33087	0.143101	-2.31214	0.0207698	0.998732
Srl	18.446	0.641912	0.277635	2.31207	0.0207739	0.998732
Fam167a	3.24535	1.90698	0.825126	2.31114	0.0208249	0.998732
Cry1	155.882	0.503662	0.217985	2.31054	0.0208584	0.998732
Ggact	179.664	-0.319175	0.13817	-2.31002	0.0208871	0.998732
Chmp2b	206.765	-0.199708	0.0864643	-2.30972	0.0209039	0.998732
Ppp1r14b	60.597	0.530992	0.230048	2.30818	0.0209891	0.998732
Rbpsuh-rs3	32.3366	0.636181	0.27572	2.30735	0.0210355	0.998732
Cand2	2.9849	-1.81389	0.786533	-2.30618	0.0211004	0.998732
Ctcf	973.515	-0.228236	0.0989754	-2.30599	0.0211114	0.998732
Eomes	108.816	0.840907	0.364676	2.3059	0.0211161	0.998732
Cfap46	21.9124	0.833818	0.361695	2.30531	0.0211494	0.998732
Acrbp	97.1065	0.457902	0.198755	2.30385	0.0212311	0.998732
Gm18048	58.5706	-0.418755	0.181776	-2.30369	0.0212403	0.998732
Itm2c	2020.97	0.336711	0.14621	2.30292	0.0212831	0.998732
2010107G23Rik	78.4556	0.356587	0.154882	2.30232	0.0213172	0.998732
Oxr1	853.832	-0.313053	0.136008	-2.30173	0.0213505	0.998732
Smim11	137.024	0.303659	0.131999	2.30046	0.0214221	0.998732
Gsdmd	7.20344	-1.03158	0.448537	-2.29988	0.021455	0.998732
5730455P16Rik	472.442	-0.306484	0.133261	-2.29988	0.0214553	0.998732
Rbm15b	121.318	0.33843	0.147232	2.29862	0.0215268	0.998732
Gm5611	51.0163	-0.578865	0.25184	-2.29854	0.0215312	0.998732
Terf1	109.858	-0.305303	0.132854	-2.29803	0.02156	0.998732
3110056K07Rik	12.0828	0.981114	0.427102	2.29714	0.0216105	0.998732
Gm28661	219.811	-0.463765	0.201957	-2.29635	0.0216559	0.998732
Gm29216	44.7339	0.737486	0.321159	2.29632	0.0216574	0.998732
Sec11a	113.955	0.340123	0.148287	2.29368	0.0218091	0.998732
Erp44	100.374	0.457407	0.199531	2.29241	0.0218822	0.998732
4930558K02Rik	2.08744	-2.27258	0.991466	-2.29214	0.0218975	0.998732
Bet1	28.4897	0.613348	0.267649	2.29161	0.0219282	0.998732
Mettl5os	4.55666	-1.46699	0.640234	-2.29134	0.0219438	0.998732
Polr1d	176.283	0.404475	0.176713	2.28888	0.0220861	0.998732
Brk1	457.128	0.279788	0.122309	2.28755	0.022164	0.998732
Myo5a	1891.85	-0.217146	0.0949955	-2.28585	0.0222629	0.998732
Gm3608	34.8725	0.560717	0.245311	2.28575	0.0222692	0.998732
Zfp595	12.9974	-0.874354	0.382534	-2.28569	0.0222723	0.998732
Id2	1861.22	0.324396	0.141968	2.28499	0.0223134	0.998732
RP23-21P2,7	70.1632	-0.603914	0.264335	-2.28466	0.022333	0.998732
Med23	70.9041	0.427565	0.187279	2.28303	0.0224285	0.998732
RP24-167M10,4	16.2812	-0.847245	0.371232	-2.28225	0.0224744	0.998732
Zmym1	95.5331	0.289432	0.126858	2.28155	0.0225158	0.998732
RP23-21P2,8	129.58	-0.410284	0.179878	-2.2809	0.0225541	0.998732
Gm14292	9.11204	-0.938831	0.412075	-2.2783	0.0227084	0.998732
Anapc10	49.146	0.474345	0.208203	2.27828	0.0227102	0.998732
Lrrn3	94.1148	0.379833	0.166935	2.27534	0.0228858	0.998732
Wnt7b	41.7413	-0.486172	0.213726	-2.27474	0.0229215	0.998732
Luzp2	64.4968	-0.609654	0.268034	-2.27454	0.0229333	0.998732
Topors	216.167	-0.282629	0.124299	-2.27379	0.0229789	0.998732
Gmpr2	42.4723	0.464847	0.204567	2.27235	0.0230652	0.998732
RP23-193O23,2	1.76699	-2.53132	1.11532	-2.26958	0.0232331	0.998732
Mta2	95.8036	0.428342	0.188736	2.26952	0.0232366	0.998732
Adap2	38.1088	-0.631582	0.278297	-2.26946	0.0232406	0.998732
Smpd5	2.49065	-1.92722	0.849226	-2.26939	0.0232446	0.998732
Dpf2	121.072	0.327749	0.144478	2.2685	0.0232986	0.998732
Wipf3	381.748	0.284033	0.125216	2.26835	0.0233079	0.998732
Gm16244	1.89211	2.52704	1.11416	2.26811	0.0233225	0.998732
Gramd2	7.34003	-1.15104	0.507556	-2.2678	0.0233412	0.998732
Ppip5k2	282.006	-0.297014	0.130985	-2.26755	0.0233566	0.998732
Pdcd4	481.231	-0.25542	0.112771	-2.26494	0.0235162	0.998732
Kdm5a	594.012	-0.19689	0.0869386	-2.2647	0.0235312	0.998732
Rabep1	1334.94	-0.202071	0.0892423	-2.2643	0.0235557	0.998732
Zfp106	1233.41	-0.238886	0.105502	-2.26427	0.0235576	0.998732
Caml	108.784	0.344168	0.152036	2.26374	0.0235904	0.998732
Eif1	1409.06	0.238662	0.105471	2.26282	0.0236466	0.998732
Gm27184	3.34522	1.74111	0.769703	2.26206	0.0236938	0.998732
Ssb	2009.86	-0.178048	0.0787119	-2.26202	0.0236959	0.998732
Wdr43	398.785	-0.237356	0.104996	-2.26062	0.0237831	0.998732
Lingo4	51.441	-0.556758	0.246331	-2.2602	0.023809	0.998732
Fnbp4	294.069	-0.392566	0.173751	-2.25936	0.0238611	0.998732
Oprd1	1.60636	-2.2897	1.01367	-2.25882	0.0238947	0.998732
Trim41	153.644	0.288964	0.127969	2.25809	0.0239403	0.998732
Mcfd2	114.203	0.457545	0.202627	2.25806	0.0239418	0.998732
Spsb1	84.6444	-0.364771	0.161564	-2.25775	0.0239611	0.998732
Bmi1	169.144	0.274038	0.121435	2.25667	0.0240286	0.998732
RP23-273N4,8	1.02187	-2.80456	1.24448	-2.2536	0.0242214	0.998732
Cyb5a	168.896	0.284568	0.12631	2.25294	0.024263	0.998732
BC007180	121.473	-0.430785	0.191324	-2.25161	0.0243472	0.998732
2210018M11Rik	276.47	0.247671	0.110008	2.25139	0.0243607	0.998732
Atoh8	15.1248	0.91959	0.409461	2.24586	0.0247132	0.998732
Wnk2	294.356	0.235242	0.104745	2.24585	0.0247135	0.998732
Rit2	438.678	0.244191	0.108737	2.24571	0.0247225	0.998732
Nek5	5.02063	1.29188	0.575575	2.24451	0.0247995	0.998732
Rer1	177.586	0.278784	0.124281	2.24317	0.0248857	0.998732
Smarcc1	398.944	-0.307092	0.136904	-2.24313	0.0248886	0.998732
Dnajc14	73.4842	0.432276	0.192764	2.24252	0.0249278	0.998732
Col1a1	110.694	0.595434	0.265778	2.24035	0.0250684	0.998732
Maged1	721.656	0.274732	0.122637	2.2402	0.0250779	0.998732
Naglu	31.1626	-0.687586	0.307043	-2.23938	0.0251314	0.998732
Prepl	292.258	-0.469591	0.209703	-2.23931	0.0251355	0.998732
Gpr34	14.6063	0.774461	0.345884	2.23908	0.0251508	0.998732
Ccser1	67.1849	-0.462665	0.206661	-2.23876	0.0251715	0.998732
Calr	786.331	0.274622	0.122715	2.23788	0.0252288	0.998732
Angptl4	5.37631	-1.20834	0.54004	-2.2375	0.0252536	0.998732
Rpl22l1	484.071	0.263029	0.117612	2.23641	0.0253246	0.998732
1500004A13Rik	125.848	-0.389388	0.17417	-2.23568	0.0253729	0.998732
Pcdhb13	4.27887	1.57433	0.70424	2.2355	0.0253845	0.998732
Shisa3	2.8328	2.26772	1.01482	2.23459	0.0254441	0.998732
Slc1a3	3888.11	0.321255	0.143784	2.23429	0.0254641	0.998732
Zcchc11	795.301	-0.340501	0.152431	-2.23381	0.0254958	0.998732
Thoc1	173.194	0.286386	0.128263	2.23281	0.0255618	0.998732
Ahsa1	96.8507	0.520729	0.233281	2.2322	0.0256018	0.998732
Bckdha	53.1354	-0.42714	0.191449	-2.2311	0.0256747	0.998732
Ndufa8	623.524	0.285437	0.127938	2.23106	0.0256773	0.998732
Dapk1	133.527	0.440529	0.19759	2.22951	0.0257797	0.998732
Cela1	11.9351	-0.869721	0.39019	-2.22897	0.0258161	0.998732
Vopp1	151.436	0.255196	0.114498	2.22884	0.0258248	0.998732
5830428H23Rik	324.551	0.234305	0.105143	2.22845	0.0258506	0.998732
Ldoc1	46.4522	-0.514024	0.230704	-2.22806	0.0258762	0.998732
Atn1	82.4184	0.497514	0.223434	2.22667	0.0259696	0.998732
RP23-169H13,6	25.9883	-0.84317	0.378701	-2.22648	0.025982	0.998732
Gm20655	4.67106	-1.53615	0.690318	-2.22528	0.0260626	0.998732
Hnrnpc	857.874	0.175631	0.0789418	2.22482	0.0260935	0.998732
Prps2	53.9384	-0.433111	0.194728	-2.22418	0.0261362	0.998732
Zbbx	1.24324	-2.47943	1.11555	-2.22261	0.0262419	0.998732
Gm28784	12.7184	0.930283	0.41869	2.22189	0.0262907	0.998732
Ddx42	407.034	-0.28749	0.129432	-2.22117	0.0263393	0.998732
2810428I15Rik	209.271	0.283729	0.127741	2.22113	0.0263424	0.998732
Ube2g1	155.296	0.445864	0.20075	2.22099	0.0263514	0.998732
Gm26569	1.81211	-2.51247	1.13124	-2.22099	0.0263516	0.998732
1700123M08Rik	2.811	1.93573	0.871717	2.22059	0.0263785	0.998732
D030056L22Rik	122.115	0.334241	0.150596	2.21946	0.0264556	0.998732
Arl16	82.2137	-0.352656	0.158969	-2.21839	0.0265282	0.998732
5830444B04Rik	1.29883	3.41345	1.54021	2.21622	0.0266763	0.998732
Ddx10	331.984	-0.235609	0.106389	-2.21459	0.0267881	0.998732
Nutf2-ps1	2.11798	-1.93152	0.872414	-2.214	0.026829	0.998732
Cebpb	11.5505	1.0044	0.453741	2.21359	0.0268567	0.998732
Ctbp1	643.835	0.207421	0.0937056	2.21354	0.0268604	0.998732
RP23-416H10,7	4.65945	-1.54148	0.696415	-2.21345	0.0268669	0.998732
Hspb11	47.9751	0.513326	0.231957	2.21302	0.026896	0.998732
Pum2	661.325	0.235065	0.106227	2.21286	0.0269074	0.998732
Itpkb	325.265	-0.299674	0.135466	-2.21216	0.0269555	0.998732
Tmem165	96.407	0.334909	0.1514	2.21208	0.026961	0.998732
Sh3pxd2b	67.6319	0.471269	0.213072	2.21179	0.0269815	0.998732
2810021J22Rik	22.2081	-0.611641	0.276572	-2.21151	0.0270006	0.998732
Mut	313.523	0.230334	0.104207	2.21034	0.0270816	0.998732
Gm16352	3.81832	-1.43124	0.647623	-2.20999	0.0271058	0.998732
Trafd1	155.272	0.332663	0.150614	2.20872	0.0271941	0.998732
Pitx2	1.96538	3.29839	1.4935	2.20849	0.02721	0.998732
Mex3c	101.053	0.395914	0.179717	2.20298	0.0275961	0.998732
Gm25190	1.22511	-2.58443	1.17327	-2.20276	0.0276119	0.998732
Kctd20	123.783	0.361525	0.164236	2.20126	0.0277176	0.998732
Pdlim2	231.296	-0.520979	0.236752	-2.20053	0.0277694	0.998732
Tpr	1983.56	-0.244564	0.11114	-2.20049	0.0277719	0.998732
Dap	91.9428	0.357741	0.162573	2.20049	0.0277721	0.998732
Fancg	29.1363	0.580437	0.26394	2.19913	0.0278688	0.998732
Cap2	204.887	0.298586	0.135798	2.19875	0.0278958	0.998732
Cstf2t	208.379	0.378997	0.172485	2.19728	0.0280005	0.998732
BC033916	1.55539	-2.91663	1.3274	-2.19726	0.0280022	0.998732
Gm26546	1.18214	-3.00177	1.36666	-2.19643	0.0280611	0.998732
Uckl1os	2.6513	-1.8207	0.829148	-2.19587	0.0281011	0.998732
Cdkl2	128.128	-0.310094	0.141285	-2.19481	0.0281774	0.998732
Zfp598	203.159	0.374874	0.170926	2.19319	0.0282936	0.998732
Mllt6	708.269	0.177473	0.0809246	2.19307	0.0283024	0.998732
RP24-541A5,1	73.9264	-0.494009	0.225375	-2.19194	0.028384	0.998732
Ptpra	583.833	-0.248404	0.113391	-2.19068	0.0284747	0.998732
Tspan2	258.357	0.261188	0.11924	2.19045	0.028492	0.998732
Eif3k	428.173	0.348551	0.159151	2.19006	0.0285197	0.998732
Llgl2	4.93801	-1.39656	0.637716	-2.18995	0.0285282	0.998732
Oasl2	8.62854	1.17391	0.536092	2.18975	0.0285426	0.998732
Ppp4r1l-ps	263.806	-0.276554	0.126415	-2.18767	0.0286938	0.998732
Dzip1l	61.5474	-0.523957	0.239659	-2.18626	0.0287963	0.998732
Cd44	47.3056	0.513021	0.23472	2.18567	0.0288398	0.998732
Lrrcc1	331.763	-0.225164	0.103033	-2.18537	0.028862	0.998732
Syt3	188.741	-0.308986	0.141394	-2.18528	0.0288682	0.998732
Pdap1	740.874	-0.253801	0.116159	-2.18495	0.0288926	0.998732
Armcx4	169.321	0.302377	0.138412	2.18462	0.0289167	0.998732
Pik3cb	100.952	0.311401	0.142574	2.18414	0.0289523	0.998732
Psd2	463.352	0.40841	0.187055	2.18337	0.0290083	0.998732
Nvl	294.404	-0.271802	0.124516	-2.18288	0.0290448	0.998732
Patl2	1.00595	-3.11884	1.42917	-2.18228	0.0290888	0.998732
Gm4975	1.34232	-2.80538	1.2861	-2.18132	0.0291601	0.998732
Wdpcp	12.4305	-0.78132	0.358254	-2.18091	0.0291901	0.998732
Csrnp2	59.3355	0.431066	0.197728	2.18009	0.0292506	0.998732
Rps19-ps11	2.09517	-1.78438	0.8185	-2.18006	0.029253	0.998732
RP24-429G21,4	25.1671	-0.695899	0.319275	-2.17962	0.0292854	0.998732
Slc30a9	549.985	-0.185982	0.0853343	-2.17946	0.0292978	0.998732
Fkbp14	48.2349	0.47875	0.219683	2.17928	0.0293112	0.998732
Hmgn1	393.513	0.308128	0.141451	2.17833	0.0293813	0.998732
Gm14541	3.46454	1.64317	0.754441	2.178	0.0294059	0.998732
Prr5l	149.356	-0.369109	0.169476	-2.17794	0.0294102	0.998732
Lrrc47	270.2	-0.241229	0.110765	-2.17785	0.0294174	0.998732
Ctdsp2	267.727	0.329026	0.15117	2.17653	0.0295154	0.998732
Ctdspl	124.498	0.347173	0.159616	2.17505	0.0296264	0.998732
Gm11224	3.09372	2.05092	0.943057	2.17476	0.0296483	0.998732
Bud13	86.1231	-0.446633	0.205412	-2.17433	0.0296805	0.998732
Vps37b	99.1054	0.333958	0.153733	2.17232	0.0298313	0.998732
Cdkl5	68.4107	-0.528172	0.243141	-2.17229	0.0298341	0.998732
Zfp125	1.11536	3.18696	1.46749	2.17171	0.0298775	0.998732
2007-09-01	2349.51	-0.132889	0.0612221	-2.17061	0.029961	0.998732
Zfp804b	6.7599	-1.22011	0.562372	-2.16958	0.0300383	0.998732
Vstm2a	179.203	-0.431142	0.19873	-2.16949	0.0300455	0.998732
Zcchc6	346.578	-0.357426	0.164774	-2.16919	0.0300686	0.998732
Zfp251	104.984	-0.348631	0.16073	-2.16905	0.0300788	0.998732
Rprd1b	395.428	-0.279997	0.129095	-2.16892	0.0300891	0.998732
Pou2f1	488.034	0.252617	0.116522	2.16798	0.0301604	0.998732
Tars	233.826	0.306594	0.141456	2.16741	0.0302036	0.998732
Dusp1	221.757	0.507249	0.234063	2.16715	0.0302236	0.998732
Grik3	86.2608	0.429065	0.198006	2.16693	0.0302399	0.998732
Acot11	95.029	0.412637	0.190435	2.16682	0.0302488	0.998732
Hnrnpk	1173.91	0.164594	0.0759937	2.16589	0.0303193	0.998732
Slco1b2	1.76203	2.44941	1.13143	2.16488	0.0303969	0.998732
Map7d2	1496.73	-0.27033	0.124897	-2.16443	0.0304314	0.998732
Etfdh	64.0941	0.461074	0.213088	2.16378	0.0304816	0.998732
Mtmr7	102.093	-0.43822	0.202553	-2.16348	0.0305043	0.998732
RP23-379F6,3	7.65954	-1.04696	0.484014	-2.16307	0.0305356	0.998732
Rpl13	252.954	-0.294464	0.136134	-2.16305	0.0305377	0.998732
Dll3	6.77407	1.19286	0.551489	2.16297	0.0305433	0.998732
Vcpip1	330.757	-0.234805	0.10859	-2.1623	0.0305947	0.998732
Ccdc176	65.9277	-0.485525	0.22457	-2.16202	0.0306163	0.998732
Elac2	58.0507	0.379378	0.175504	2.16165	0.0306451	0.998732
Asb18	0.998959	-3.09041	1.42998	-2.16116	0.030683	0.998732
Cdca7	1.97876	2.18897	1.01325	2.16034	0.0307466	0.998732
Vstm4	43.6761	0.619383	0.286879	2.15904	0.0308469	0.998732
Tmem33	275.38	0.215214	0.0997052	2.15851	0.0308885	0.998732
Cep295	205.383	-0.311543	0.144358	-2.15813	0.030918	0.998732
Mars2	45.8317	-0.429591	0.19917	-2.15691	0.031013	0.998732
Anks6	21.267	0.721033	0.334452	2.15587	0.0310942	0.998732
Ccdc177	337.416	-0.265838	0.123364	-2.15491	0.0311686	0.998732
Zxdc	110.693	-0.316202	0.146742	-2.15481	0.0311763	0.998732
Slc25a22	312.768	0.478019	0.221902	2.15419	0.0312253	0.998732
Ppif	102.087	0.417457	0.193861	2.15338	0.0312885	0.998732
Men1	161.286	0.334568	0.155408	2.15283	0.0313319	0.998732
Strbp	2927.99	-0.168671	0.0783498	-2.15279	0.0313353	0.998732
Slc52a3	5.06096	1.21114	0.562737	2.15224	0.0313787	0.998732
Casc4	380.343	-0.303688	0.141138	-2.15171	0.03142	0.998732
Rps3	807.221	0.339865	0.157968	2.15148	0.0314385	0.998732
Plec	349.625	-0.237944	0.110604	-2.15132	0.0314513	0.998732
Rph3a	1074.78	-0.237094	0.110263	-2.15025	0.0315357	0.998732
Gm10059	573.017	0.292067	0.135852	2.1499	0.0315631	0.998732
Clcc1	352.581	0.379496	0.176522	2.14985	0.0315669	0.998732
Hck	5.97247	1.21054	0.563239	2.14924	0.0316154	0.998732
Fam159b	1.00307	3.08305	1.43463	2.14902	0.0316326	0.998732
Zfp568	29.5172	-0.559523	0.260389	-2.1488	0.0316504	0.998732
1700095J07Rik	2.366	2.24479	1.04502	2.14807	0.0317078	0.998732
Dennd1a	124.724	0.259541	0.120888	2.14695	0.0317971	0.998732
Gdpd3	21.7669	0.602929	0.280877	2.1466	0.0318255	0.998732
Pdp1	169.358	0.242763	0.113105	2.14636	0.0318442	0.998732
Agl	273.591	-0.267936	0.124849	-2.14609	0.0318661	0.998732
Hspb2	1.95282	2.58485	1.20449	2.14601	0.031872	0.998732
Slc12a7	16.0771	0.743618	0.346647	2.14517	0.0319389	0.998732
Gm8444	16.5714	0.75055	0.349909	2.14499	0.031954	0.998732
Clptm1l	217.14	0.327731	0.152867	2.14389	0.0320415	0.998732
Trnt1	154.804	-0.332953	0.155311	-2.14378	0.0320502	0.998732
Srek1	557.096	-0.217108	0.101322	-2.14276	0.0321327	0.998732
Birc2	209.932	0.270902	0.12644	2.14254	0.0321502	0.998732
Gm16153	1.90781	2.5426	1.18777	2.14064	0.032303	0.998732
Dusp6	176.901	0.446175	0.208526	2.13966	0.0323827	0.998732
Arf4	286.93	0.297052	0.138887	2.1388	0.0324519	0.998732
Pex5	47.6078	0.527269	0.246546	2.13863	0.0324658	0.998732
Zfp94	27.6011	0.531238	0.24841	2.13855	0.0324721	0.998732
Wfdc17	2.92035	-1.65525	0.774433	-2.13737	0.0325675	0.998732
RP24-92A2,1	50.2373	-0.464459	0.217348	-2.13693	0.0326034	0.998732
Rbm25	2424.9	-0.223484	0.104591	-2.13674	0.032619	0.998732
Col13a1	17.9418	-0.659986	0.308877	-2.13673	0.0326203	0.998732
Exosc7	121.628	0.352765	0.165148	2.13605	0.0326757	0.998732
Polr2g	223.901	0.32821	0.153728	2.135	0.0327609	0.998732
Adi1	60.0228	0.355256	0.166405	2.13489	0.0327698	0.998732
Slc19a3	4.2291	1.49738	0.701765	2.13374	0.0328641	0.998732
Bag2	27.9023	0.561881	0.263347	2.13362	0.0328742	0.998732
Tnnc2	1.83746	2.43904	1.14336	2.13322	0.0329066	0.998732
Cntn2	1473.64	-0.234913	0.110153	-2.1326	0.0329574	0.998732
B230325K18Rik	49.5364	-0.441729	0.207164	-2.13227	0.0329846	0.998732
1110012L19Rik	23.6986	0.497406	0.233561	2.12966	0.0331999	0.998732
Slain1	136.147	0.326467	0.153297	2.12964	0.0332014	0.998732
Mef2d	691.351	0.262256	0.123252	2.1278	0.0333534	0.998732
Wsb2	416.304	0.187632	0.0882057	2.12721	0.0334029	0.998732
Glul	5853.33	0.222806	0.104742	2.12718	0.0334053	0.998732
Ccdc3	26.8495	-0.553919	0.260402	-2.12717	0.0334063	0.998732
Gm26803	9.76046	-0.98638	0.463815	-2.12667	0.0334477	0.998732
Mrps18c	114.885	0.32631	0.153609	2.12429	0.0336458	0.998732
Ppp1r12a	645.26	-0.237731	0.112014	-2.12234	0.0338095	0.998732
Ccdc181	131.663	-0.303018	0.142816	-2.12173	0.0338603	0.998732
Las1l	243.02	-0.242716	0.114403	-2.12159	0.0338723	0.998732
Gfm2	138.411	-0.340376	0.160438	-2.12155	0.0338759	0.998732
Rnft1	43.0799	0.453775	0.213895	2.12149	0.0338807	0.998732
Rtn2	147.601	0.285803	0.134735	2.12123	0.0339029	0.998732
Slco1a4	192.957	-0.243077	0.114688	-2.11946	0.0340514	0.998732
Sarm1	53.3297	-0.435849	0.205642	-2.11945	0.0340522	0.998732
Scg3	1459.74	-0.197066	0.0929816	-2.11941	0.0340558	0.998732
Bclaf1	1617.65	-0.256708	0.121127	-2.11934	0.0340619	0.998732
Arhgef6	49.0248	-0.376085	0.177469	-2.11915	0.0340774	0.998732
Nemf	467.356	-0.181768	0.0858422	-2.11747	0.03422	0.998732
Ythdf1	321.228	0.269018	0.127072	2.11705	0.0342553	0.998732
Pigm	55.7064	0.455054	0.214994	2.11659	0.0342945	0.998732
RP24-245M20,4	16.1949	-0.826525	0.390738	-2.11529	0.0344052	0.998732
Lin52	36.2612	0.681197	0.322046	2.11521	0.0344116	0.998732
Gm27032	46.8625	0.400731	0.189493	2.11476	0.0344505	0.998732
Glg1	2006.51	-0.276124	0.130606	-2.11417	0.0345004	0.998732
Dpysl2	1113.67	0.297334	0.14064	2.11415	0.0345027	0.998732
Arpc5	192.438	0.264745	0.12524	2.1139	0.0345234	0.998732
Trappc8	89.5138	-0.432818	0.204849	-2.11286	0.0346125	0.998732
Ccbl1	95.8214	0.303219	0.143549	2.11231	0.03466	0.998732
Mest	51.9498	-0.478354	0.226464	-2.11227	0.0346632	0.998732
Gpatch4	155.188	-0.323831	0.153327	-2.11204	0.0346834	0.998732
Gad1	1099.45	0.356862	0.168992	2.11171	0.0347111	0.998732
Spopl	224.868	-0.303265	0.143643	-2.11124	0.0347518	0.998732
Ccdc186	496.946	-0.199388	0.0944583	-2.11086	0.0347845	0.998732
Nt5dc1	7.87253	0.917568	0.434702	2.1108	0.0347898	0.998732
Gnal	649.062	-0.247001	0.117051	-2.1102	0.0348413	0.998732
Abr	418.107	0.302282	0.143264	2.10997	0.0348611	0.998732
Srsf11	1423.24	-0.206138	0.0977065	-2.10977	0.0348782	0.998732
Cnpy2	117.862	0.415563	0.197052	2.1089	0.034953	0.998732
Endod1	613.197	-0.28049	0.133023	-2.10858	0.034981	0.998732
Ppp1r35	15.6157	0.97248	0.461366	2.10783	0.0350459	0.998732
Ube2q2	128.604	-0.359017	0.170329	-2.10778	0.0350498	0.998732
Perp	23.837	0.735948	0.349166	2.10773	0.035054	0.998732
Hoxb5	61.2513	-1.39146	0.660222	-2.10756	0.0350693	0.998732
Cnnm2	88.9366	-0.375045	0.177992	-2.10709	0.0351099	0.998732
Tmc4	4.89434	1.22793	0.582817	2.10689	0.0351268	0.998732
Gm11702	1.22011	2.63245	1.24999	2.10598	0.0352059	0.998732
Sass6	62.295	-0.491757	0.233594	-2.10518	0.035276	0.998732
Phf7	17.8902	-0.723409	0.343645	-2.10511	0.0352819	0.998732
Zfp275	128.3	0.313759	0.149093	2.10445	0.0353389	0.998732
Zswim1	51.194	-0.423947	0.201476	-2.10421	0.0353605	0.998732
Mfsd8	31.0383	0.631938	0.300451	2.1033	0.0354396	0.998732
Ctf1	4.20441	1.58304	0.752736	2.10304	0.035462	0.998732
Rny3	50.2132	-0.397739	0.189168	-2.10257	0.0355033	0.998732
Taf3	340.286	-0.291038	0.138486	-2.10157	0.0355912	0.998732
Srp54a	1.35168	2.73434	1.30117	2.10144	0.0356024	0.998732
Zfp423	157.572	0.263246	0.125274	2.10135	0.0356101	0.998732
5330434G04Rik	708.529	-0.335622	0.159783	-2.10049	0.035686	0.998732
Ppp1ca	527.783	0.260517	0.124063	2.09988	0.0357395	0.998732
Rmnd5b	88.0098	0.408376	0.194492	2.09971	0.0357548	0.998732
2900052L18Rik	33.5026	-0.503277	0.239701	-2.0996	0.0357642	0.998732
Gm15681	2.22815	2.6957	1.28395	2.09953	0.0357702	0.998732
Unc119b	84.602	0.443903	0.211478	2.09905	0.0358121	0.998732
Plvap	90.2986	0.334128	0.159199	2.09882	0.0358332	0.998732
Alyref2	26.56	0.558362	0.2661	2.09832	0.0358771	0.998732
Ap1b1	511.391	-0.201198	0.0959067	-2.09786	0.0359179	0.998732
Arih2	305.817	0.248973	0.118737	2.09684	0.0360077	0.998732
Tmco1	257.304	-0.264407	0.126161	-2.09578	0.0361017	0.998732
Armcx6	28.4023	-0.576232	0.274959	-2.0957	0.0361086	0.998732
Ogg1	15.6993	-0.785201	0.374759	-2.09521	0.036152	0.998732
Ptbp3	154.517	0.259997	0.124096	2.09512	0.03616	0.998732
Fev	2.769	2.60693	1.24432	2.09507	0.036165	0.998732
Gm16897	2.12937	-1.89324	0.903873	-2.09459	0.0362075	0.998732
Spata18	2.09665	1.84576	0.881641	2.09355	0.0362998	0.998732
Opa1	493.351	-0.183997	0.0879022	-2.0932	0.0363314	0.998732
Tpm2	72.9501	-0.374899	0.179108	-2.09314	0.0363369	0.998732
Guca1b	3.67431	1.34099	0.640685	2.09306	0.0363441	0.998732
Ccdc34	288.627	-0.287446	0.137346	-2.09287	0.0363612	0.998732
RP23-21P2,2	131.139	-0.321752	0.153858	-2.09123	0.0365073	0.998732
Mpst	70.1184	-0.373514	0.178795	-2.08906	0.0367024	0.998732
Zfp30	312.375	-0.282054	0.135051	-2.0885	0.036753	0.998732
Fam46a	73.4577	0.496242	0.237612	2.08846	0.0367568	0.998732
Gm15773	143.616	-0.302841	0.14502	-2.08826	0.036774	0.998732
Mdk	258.046	0.286049	0.137016	2.0877	0.0368246	0.998732
Dnal4	124.034	0.280919	0.13457	2.08752	0.0368409	0.998732
Mamstr	4.65262	-1.25831	0.603117	-2.08634	0.0369478	0.998732
Cxcl12	242.961	0.257047	0.123242	2.0857	0.0370059	0.998732
Sgk1	266.067	0.354381	0.169997	2.08463	0.0371028	0.998732
Vma21	419.007	0.192683	0.0924365	2.08449	0.0371158	0.998732
Sacs	568.655	-0.273012	0.131004	-2.08399	0.0371607	0.998732
Gm29462	2.01528	1.85594	0.890584	2.08396	0.0371636	0.998732
Itih5	303.086	-0.253261	0.12155	-2.0836	0.037197	0.998732
Srpx2	9.81026	-0.972838	0.467014	-2.0831	0.0372418	0.998732
Prkdc	92.2825	-0.358494	0.172119	-2.08283	0.037267	0.998732
Rnaset2a	36.869	0.532518	0.255683	2.08272	0.0372763	0.998732
Mab21l1	257.93	-0.390058	0.187302	-2.08251	0.037296	0.998732
Neu1	233.605	0.252221	0.121138	2.0821	0.0373334	0.998732
Gm13889	221.428	0.293206	0.140825	2.08206	0.0373373	0.998732
Tgfbr2	24.1138	0.620684	0.298161	2.0817	0.0373695	0.998732
Wnt9b	3.44636	-1.42074	0.682533	-2.08157	0.0373816	0.998732
Gm19345	4.87987	1.2771	0.614088	2.07966	0.0375564	0.998732
Ccdc148	68.0675	-0.474469	0.228164	-2.0795	0.037571	0.998732
Prkcb	2123.57	0.203501	0.0978786	2.07912	0.0376066	0.998732
Bod1l	1487.01	-0.268183	0.128992	-2.07907	0.0376109	0.998732
Sec22c	100.808	0.347565	0.167226	2.07842	0.0376707	0.998732
Mn1	31.7055	0.524379	0.252327	2.07817	0.0376937	0.998732
Stk17b	149.734	0.464197	0.223377	2.07809	0.0377008	0.998732
Rgs19	15.5749	-0.83706	0.40283	-2.07795	0.0377143	0.998732
Sar1a	244.821	0.223277	0.107467	2.07763	0.0377432	0.998732
C4a	3.38886	1.46216	0.703781	2.07758	0.037748	0.998732
Slco1c1	166.12	-0.294788	0.142019	-2.07569	0.0379227	0.998732
Mical3	269.47	-0.30066	0.144863	-2.07547	0.0379426	0.998732
Utp15	73.0557	-0.334701	0.161283	-2.07524	0.0379644	0.998732
Gatb	35.6551	0.487597	0.235039	2.07453	0.03803	0.998732
Dmxl2	568.931	-0.206241	0.099443	-2.07397	0.0380825	0.998732
Scaf11	618.16	-0.27891	0.134509	-2.07354	0.0381219	0.998732
RP23-156A3,2	41.6017	-0.349278	0.168509	-2.07276	0.0381947	0.998732
Fos	138.896	0.710956	0.343178	2.07168	0.0382949	0.998732
Rpl31-ps11	2.78437	2.54545	1.22948	2.07035	0.0384195	0.998732
A230065H16Rik	5.07	1.8376	0.887737	2.06998	0.0384542	0.998732
Edc3	134.626	0.250056	0.120803	2.06995	0.0384573	0.998732
Rnf8	239.059	0.230693	0.111469	2.06957	0.038493	0.998732
Golgb1	895.718	-0.291604	0.140922	-2.06926	0.0385219	0.998732
Gli3	34.5103	0.511356	0.247122	2.06925	0.0385229	0.998732
Plcxd2	390.667	-0.304468	0.147193	-2.0685	0.0385927	0.998732
Otx1	6.94864	1.1699	0.565581	2.0685	0.038593	0.998732
Gm5786	2.52342	2.29311	1.10893	2.06787	0.0386523	0.998732
Atxn2l	88.2565	0.383846	0.185678	2.06727	0.0387091	0.998732
Bicc1	78.2683	-0.31761	0.153706	-2.06635	0.0387956	0.998732
Hsph1	616.339	0.322817	0.156279	2.06564	0.0388622	0.998732
B4galt6	376.935	0.237583	0.115026	2.06548	0.038878	0.998732
Fam193a	870.893	-0.237565	0.115036	-2.06513	0.0389103	0.998732
C5ar1	2.28851	2.63011	1.27361	2.06508	0.0389152	0.998732
Ldha	193.916	0.275575	0.133455	2.06493	0.03893	0.998732
Gspt1	230.02	-0.315818	0.152946	-2.0649	0.0389324	0.998732
Gm4202	268.272	-0.595223	0.288267	-2.06483	0.0389387	0.998732
Cdk12	400.552	-0.33094	0.160323	-2.06421	0.0389979	0.998732
Arid1a	507.209	0.22399	0.108536	2.06374	0.0390421	0.998732
Ythdf3	433.648	0.237515	0.115184	2.06206	0.0392024	0.998732
Gnaq	1037.51	0.209543	0.101621	2.062	0.0392081	0.998732
Arl8a	146.97	0.455887	0.221128	2.06164	0.0392416	0.998732
Pcdhb22	47.9425	-0.445233	0.216085	-2.06045	0.0393556	0.998732
Chac1	23.9276	0.694883	0.337324	2.05998	0.0394001	0.998732
Bcl6	305.379	0.315751	0.153282	2.05993	0.0394048	0.998732
Rrbp1	509.028	-0.291265	0.141431	-2.05942	0.0394543	0.998732
Gpsm3	3.37981	1.35081	0.656014	2.05912	0.039483	0.998732
Mthfr	49.3776	0.445937	0.21657	2.05909	0.0394859	0.998732
Gcc2	1238.6	-0.234606	0.113938	-2.05907	0.0394876	0.998732
Ankrd34b	174.613	-0.36205	0.175866	-2.05867	0.0395256	0.998732
C77080	44.1452	0.509607	0.247849	2.05612	0.0397708	0.998732
Tmem129	47.4168	0.456393	0.222062	2.05525	0.0398549	0.998732
Gm16053	11.4169	0.959524	0.466905	2.05507	0.039872	0.998732
Stard10	395.816	0.261848	0.127596	2.05216	0.0401543	0.998732
Slc2a13	110.55	0.394518	0.192356	2.05097	0.0402695	0.998732
Vhl	129.567	0.254444	0.124088	2.05051	0.0403149	0.998732
Kif21a	1361.74	-0.286809	0.139875	-2.05047	0.0403184	0.998732
Ppm1g	202.839	0.268857	0.131134	2.05025	0.04034	0.998732
Gm12502	1.47467	-2.4097	1.17539	-2.05013	0.0403522	0.998732
Cd97	38.3367	0.532151	0.259584	2.05002	0.0403627	0.998732
Msrb3	36.0197	0.451679	0.220394	2.04941	0.0404219	0.998732
Peg10	49.9252	0.504022	0.246138	2.04772	0.0405871	0.998732
Rmnd1	71.8422	-0.294464	0.143814	-2.04753	0.0406062	0.998732
Aff3	122.742	-0.324696	0.15863	-2.04687	0.0406709	0.998732
Ctnna3	21.8914	-0.648432	0.316992	-2.04557	0.0407983	0.998732
Ksr2	425.589	-0.227074	0.111015	-2.04544	0.040812	0.998732
Ubap2l	289.725	-0.205074	0.100263	-2.04536	0.0408194	0.998732
Rgmb	9.79999	1.07966	0.527967	2.04495	0.0408602	0.998732
Fbxl6	37.753	0.581595	0.28442	2.04484	0.0408704	0.998732
Jakmip2	376.981	-0.20982	0.102621	-2.0446	0.0408946	0.998732
Atxn1l	54.2783	0.370319	0.181157	2.04418	0.0409355	0.998732
Hectd2	64.4835	-0.366135	0.179167	-2.04354	0.0409995	0.998732
Gabre	3.88279	-1.66984	0.817904	-2.04161	0.0411898	0.998732
Akt1	594.413	0.244307	0.119718	2.04069	0.0412813	0.998732
Gm6274	4.87967	1.18208	0.579558	2.03963	0.0413874	0.998732
Amn1	38.7055	0.49341	0.242125	2.03784	0.0415662	0.998732
Pole3	174.362	-0.228912	0.112333	-2.03779	0.0415705	0.998732
Prkd2	27.7147	0.566904	0.278216	2.03764	0.041586	0.998732
Hbb-bt	436.113	-0.37492	0.184	-2.03761	0.0415891	0.998732
Rnpep	119.258	0.236582	0.116248	2.03514	0.0418369	0.998732
RP23-348C6,6	2.73106	-1.49252	0.73347	-2.03488	0.0418634	0.998732
Gm15903	66.1326	0.477849	0.234973	2.03363	0.0419886	0.998732
Wbscr27	43.6365	-0.567251	0.278945	-2.03356	0.0419958	0.998732
Tex261	477.748	0.259867	0.127804	2.03332	0.0420201	0.998732
Stx3	218.806	0.217837	0.107161	2.03281	0.042072	0.998732
Crem	35.3817	0.508578	0.250208	2.03262	0.0420908	0.998732
Tob2	311.13	0.403626	0.198583	2.03253	0.0420997	0.998732
Pnpt1	61.6829	-0.471955	0.232237	-2.03221	0.0421321	0.998732
Nol8	261.898	-0.276656	0.136148	-2.03202	0.0421514	0.998732
Brsk2	663.203	-0.144417	0.0710807	-2.03174	0.0421803	0.998732
Arhgap12	323.584	0.176749	0.0870132	2.03128	0.0422262	0.998732
Cpeb2	302.991	-0.244203	0.120231	-2.03112	0.0422425	0.998732
0610009B22Rik	39.4383	0.624291	0.307425	2.03071	0.0422845	0.998732
Homer2	223.191	0.302759	0.149092	2.03069	0.0422867	0.998732
Sh3bp1	662.262	0.185627	0.0914171	2.03055	0.0423011	0.998732
Mettl4	11.3579	0.864146	0.425866	2.02915	0.0424431	0.998732
A330023F24Rik	742.934	0.242447	0.119566	2.02773	0.0425883	0.998732
Drd5	7.72876	-1.06978	0.527891	-2.02651	0.0427121	0.998732
Commd1	59.5941	0.481712	0.237715	2.02642	0.0427213	0.998732
Adra1a	32.6052	-0.506383	0.249952	-2.02592	0.0427731	0.998732
Eif4g2	1603.41	0.12693	0.0626709	2.02534	0.0428321	0.998732
RP24-393F8,3	3.55924	2.36949	1.16999	2.02523	0.0428442	0.998732
Kalrn	204.373	-0.28142	0.138996	-2.02466	0.042902	0.998732
Strada	226.322	-0.323921	0.160012	-2.02435	0.0429339	0.998732
Gm16039	54.4359	0.419276	0.20716	2.02392	0.0429785	0.998732
Diap2	293.866	-0.269483	0.133208	-2.02302	0.0430709	0.998732
Max	586.971	0.289912	0.143313	2.02293	0.0430804	0.998732
RP23-247F18,3	15.9135	0.719073	0.355476	2.02284	0.0430893	0.998732
Ror2	10.715	0.74861	0.370089	2.02278	0.0430954	0.998732
Ech1	172.032	-0.263401	0.130417	-2.01969	0.0434159	0.998732
Gm10071	1.06481	3.14591	1.55792	2.0193	0.0434559	0.998732
Mfap2	8.60068	0.864718	0.428316	2.01888	0.0434996	0.998732
Gm14450	0.920799	2.97192	1.47242	2.01839	0.0435503	0.998732
Kctd1	117.471	0.337704	0.167394	2.01742	0.0436515	0.998732
Poc1b	92.7524	0.280461	0.139034	2.01721	0.0436731	0.998732
RP23-340N22,4	48.1799	-0.518395	0.257064	-2.0166	0.0437374	0.998732
Tlr2	2.9404	1.64649	0.816605	2.01626	0.0437723	0.998732
Gm26917	225.641	0.379746	0.188374	2.01592	0.0438087	0.998732
Kin	137.376	-0.245968	0.122025	-2.01572	0.0438291	0.998732
Gm9934	3.07403	-1.76639	0.876734	-2.01474	0.0439324	0.998732
Htatsf1	442.537	-0.24361	0.12092	-2.01464	0.0439426	0.998732
Rbpjl	5.77223	1.38761	0.689009	2.01392	0.0440176	0.998732
Prpf3	144.534	0.291409	0.144868	2.01154	0.044268	0.998732
Rab6a	3173.83	0.191998	0.095521	2.01001	0.0444302	0.998732
Gm3667	1.11288	2.44533	1.21775	2.00807	0.0446362	0.998732
Frem1	6.58344	-0.954813	0.475619	-2.00751	0.0446949	0.998732
Cntrl	241.016	-0.28974	0.144371	-2.00691	0.0447594	0.998732
Rpl19	28.4212	-0.551623	0.275017	-2.00578	0.0448803	0.998732
Gm6542	48.0716	-0.370007	0.184486	-2.00561	0.0448983	0.998732
RP23-74F20,3	29.336	-0.655316	0.326758	-2.00551	0.0449086	0.998732
Hdhd2	201.338	0.329224	0.164278	2.00407	0.045063	0.998732
Myom1	7.40063	-0.995518	0.496801	-2.00386	0.0450852	0.998732
Rpl38-ps2	45.5064	0.482328	0.240835	2.00273	0.045206	0.998732
AW047730	61.7386	0.432835	0.216265	2.00141	0.0453486	0.998732
RP24-325N3,3	28.885	-0.502678	0.251187	-2.00121	0.04537	0.998732
Slc39a8	10.334	0.732186	0.365936	2.00086	0.045408	0.998732
Rabgap1l	649.784	-0.232232	0.116071	-2.00077	0.0454172	0.998732
Sipa1l2	205.495	0.284332	0.142168	1.99997	0.0455036	0.998732
Irf9	94.9533	0.330745	0.165484	1.99865	0.0456461	0.998732
Gkn3	18.2256	-0.707036	0.353783	-1.9985	0.0456622	0.998732
Pmf1	32.247	-0.502983	0.25169	-1.99842	0.0456707	0.998732
Eapp	459.883	-0.210192	0.105198	-1.99807	0.0457092	0.998732
4930550C14Rik	2.65951	-1.5657	0.783608	-1.99807	0.0457093	0.998732
Zmynd11	1238.06	0.188571	0.09441	1.99737	0.0457854	0.998732
Rufy3	2218.29	-0.141963	0.0710779	-1.99728	0.0457947	0.998732
Ahnak	164.76	-0.231308	0.11583	-1.99697	0.0458282	0.998732
Gxylt2	1.95752	2.55817	1.28192	1.99557	0.0459811	0.998732
Tnks	175.815	-0.432703	0.216874	-1.99518	0.0460236	0.998732
Oma1	74.2865	-0.316121	0.158487	-1.99461	0.046085	0.998732
Gatsl2	428.855	0.204971	0.102784	1.9942	0.0461301	0.998732
Cilp2	6.36683	-0.987386	0.495177	-1.99401	0.0461512	0.998732
Tmem39b	8.99019	0.764288	0.383299	1.99397	0.0461549	0.998732
RP23-2K13,1	2.83747	1.49192	0.748277	1.9938	0.0461739	0.998732
Ppp1r42	1.89625	2.52428	1.26685	1.99257	0.0463087	0.998732
Atf6b	272.309	0.258554	0.129784	1.99218	0.0463512	0.998732
Ephx1	74.6303	-0.361733	0.181587	-1.99207	0.0463639	0.998732
Smox	234.38	0.253892	0.12748	1.99162	0.0464129	0.998732
Pif1	1.16728	-2.56423	1.28757	-1.99152	0.0464236	0.998732
Mki67	2.99595	-1.51318	0.75989	-1.99131	0.0464471	0.998732
Nfasc	1221.44	-0.177852	0.0893352	-1.99084	0.046499	0.998732
Ccdc81	9.58921	-0.74941	0.376518	-1.99037	0.0465503	0.998732
Sfxn3	189.308	0.295168	0.148306	1.99027	0.0465612	0.998732
Utrn	499.858	-0.204017	0.102541	-1.98961	0.0466335	0.998732
Ssr3	228.523	0.258948	0.130176	1.98922	0.0466773	0.998732
Gid4	268.994	0.217503	0.10941	1.98796	0.0468159	0.998732
Baiap2	463.236	0.278908	0.140421	1.98622	0.0470085	0.998732
Rac1	1097.65	0.201598	0.101543	1.98535	0.0471053	0.998732
Gm10010	21.616	-0.596473	0.300438	-1.98534	0.0471062	0.998732
Map3k5	228.029	0.263405	0.132696	1.98502	0.0471419	0.998732
Slco2a1	21.7151	-0.641726	0.323289	-1.98499	0.0471454	0.998732
Arl4d	6.77338	1.16064	0.584762	1.98481	0.0471655	0.998732
Mgat5	400.222	0.202327	0.102035	1.98291	0.0473778	0.998732
Bcar3	44.0323	0.495269	0.249783	1.9828	0.0473903	0.998732
Cep162	201.345	-0.26199	0.132163	-1.98233	0.0474427	0.998732
Tmem198	156.144	0.355121	0.1792	1.9817	0.0475123	0.998732
Wapal	571.843	-0.309114	0.156047	-1.9809	0.0476027	0.998732
Atp11b	315.539	-0.312966	0.157992	-1.9809	0.047603	0.998732
Nfic	1763.03	-0.210726	0.106435	-1.97985	0.0477206	0.998732
Col8a1	40.3943	-0.646184	0.326382	-1.97984	0.047722	0.998732
Spag9	1780.69	-0.251848	0.127249	-1.97917	0.0477969	0.998732
2010002M12Rik	3.33029	1.53539	0.775909	1.97882	0.0478358	0.998732
1700054M17Rik	1.02162	-2.39841	1.21259	-1.97793	0.0479365	0.998732
Nrg3	25.5926	-0.531289	0.268856	-1.97611	0.0481427	0.998732
Abhd12b	1.6858	-1.98534	1.00486	-1.97574	0.0481839	0.998732
Fam35a	43.0236	-0.517537	0.261963	-1.97562	0.0481984	0.998732
Syvn1	160.898	0.441833	0.223643	1.97561	0.0481984	0.998732
Phc2	271.289	0.363676	0.184097	1.97546	0.048216	0.998732
Psmd8	653.256	0.226122	0.114475	1.97531	0.0482334	0.998732
Rassf10	2.7828	2.09179	1.05905	1.97516	0.0482501	0.998732
Gm7308	167.999	-0.463801	0.234914	-1.97434	0.0483428	0.998732
Ccng2	107.782	0.553246	0.280302	1.97375	0.0484103	0.998732
Ppt2	72.2904	0.427709	0.216815	1.97269	0.0485306	0.998732
Abcd3	347.839	0.212004	0.107472	1.97265	0.0485358	0.998732
Slc35a2	93.2828	0.395419	0.20049	1.97226	0.0485797	0.998732
Gm5526	1.1663	2.58694	1.31183	1.972	0.0486091	0.998732
Gm7694	14.3247	0.791306	0.401279	1.97196	0.0486144	0.998732
Tollip	394.551	0.430563	0.218484	1.97069	0.0487599	0.998732
Gm14284	16.3767	0.710227	0.360476	1.97025	0.0488102	0.998732
Ptprm	311.263	0.285951	0.145153	1.96999	0.048839	0.998732
Amt	105.506	0.315162	0.160006	1.96968	0.0488746	0.998732
Dcdc2b	10.5782	1.06371	0.540153	1.96927	0.0489225	0.998732
Jmjd6	207.658	0.291441	0.148016	1.96898	0.0489554	0.998732
Slc4a8	224.766	-0.19555	0.0993315	-1.96866	0.0489918	0.998732
Gm14776	108.649	-0.377702	0.191926	-1.96795	0.0490733	0.998732
Rbm14	87.7651	0.354921	0.180365	1.9678	0.0490916	0.998732
Tmem86a	59.4864	-0.398561	0.202565	-1.96757	0.0491176	0.998732
Osbpl1a	1210.99	-0.176335	0.089632	-1.96732	0.0491461	0.998732
Sh3gl1	110.935	0.356169	0.181053	1.96721	0.0491594	0.998732
Ppp1r26	73.5869	0.36906	0.18761	1.96716	0.0491643	0.998732
A330076H08Rik	620.176	-0.306451	0.15581	-1.96682	0.0492038	0.998732
Fam98c	275.547	-0.24518	0.124664	-1.96673	0.0492147	0.998732
Abca9	22.8646	-0.550915	0.280148	-1.96651	0.0492393	0.998732
Phospho2	184.308	0.267459	0.136042	1.96601	0.0492979	0.998732
Acaa2	116.378	0.341987	0.173954	1.96596	0.0493031	0.998732
Foxj2	130.578	0.389751	0.198291	1.96555	0.0493506	0.998732
Tbc1d25	87.6217	0.351455	0.178818	1.96544	0.0493639	0.998732
Glis1	6.57696	1.22346	0.622848	1.9643	0.0494959	0.998732
Eci1	53.2044	-0.554933	0.282514	-1.96427	0.0494991	0.998732
Gm27042	1.38162	2.09513	1.06663	1.96426	0.0495003	0.998732
Unc13b	77.4353	0.379393	0.193191	1.96382	0.0495511	0.998732
Tomm20	295.098	-0.214054	0.109008	-1.96365	0.0495711	0.998732
6330418K02Rik	52.3889	-0.435445	0.221834	-1.96293	0.0496545	0.998732
Phtf1	110.981	-0.329721	0.167985	-1.96281	0.0496688	0.998732
Prkca	391.617	0.203426	0.103649	1.96265	0.0496867	0.998732
Rasl12	16.4494	0.570112	0.290495	1.96255	0.049698	0.998732
Slc37a1	9.08876	0.954921	0.486741	1.96186	0.0497783	0.998732
Ubr4	1117.79	-0.207672	0.105927	-1.96051	0.0499363	0.998732
Tmem150c	181.499	-0.334061	0.170432	-1.96009	0.0499854	0.998732
RP23-393I12,4	61.8325	-0.318628	0.162598	-1.95961	0.0500415	0.998732
Adra2b	2.355	1.75002	0.893353	1.95893	0.050121	0.998732
Slc5a7	76.2574	-1.00071	0.511042	-1.95817	0.0502101	0.998732
Ccdc92	643.45	0.161765	0.0826119	1.95813	0.050215	0.998732
Ezh2	311.302	-0.324388	0.165714	-1.95751	0.050287	0.998732
A330017A19Rik	105.466	0.349406	0.178514	1.9573	0.0503123	0.998732
Lrrc20	74.5284	-0.324924	0.166019	-1.95715	0.0503302	0.998732
Nphp4	12.1344	0.950158	0.485535	1.95693	0.0503557	0.998732
Pigv	26.498	0.545692	0.278976	1.95605	0.0504587	0.998732
Aldh4a1	74.4038	0.370411	0.189386	1.95585	0.0504827	0.998732
Rps3a2	4.56628	1.46503	0.749301	1.9552	0.0505594	0.998732
Grk4	43.6212	-0.488409	0.249825	-1.95501	0.0505821	0.998732
Cerkl	43.03	-0.690076	0.353106	-1.9543	0.0506659	0.998732
Srcap	389.481	-0.322264	0.164934	-1.95389	0.050714	0.998732
Med24	74.9977	0.332435	0.170142	1.95387	0.0507164	0.998732
Pex3	117.844	-0.285649	0.146235	-1.95335	0.050778	0.998732
2610015P09Rik	85.3501	-0.396016	0.202875	-1.95202	0.0509357	0.998732
Dnajc18	366.307	-0.231727	0.118734	-1.95165	0.05098	0.998732
Lsm14a	201.974	0.257738	0.132113	1.95089	0.0510707	0.998732
Akap1	87.064	0.349694	0.17926	1.95077	0.0510847	0.998732
Mmachc	33.4917	0.451523	0.231496	1.95046	0.0511212	0.998732
1700101E01Rik	3.55658	-1.35271	0.693626	-1.95021	0.0511515	0.998732
Clcn1	81.8593	-0.407934	0.209195	-1.95002	0.0511738	0.998732
Golph3	171.908	0.31412	0.16116	1.94913	0.0512804	0.998732
Actn4	443.554	0.239648	0.122957	1.94903	0.0512918	0.998732
Serinc5	101.325	0.270018	0.138569	1.94862	0.0513414	0.998732
Inmt	5.99742	-1.32809	0.681705	-1.94819	0.0513927	0.998732
Hoxa3	11.1021	-1.09028	0.560134	-1.94647	0.0515981	0.998732
Gm26710	5.01707	1.25706	0.645862	1.94634	0.0516145	0.998732
Sdcbp	972.478	0.272242	0.139891	1.9461	0.0516428	0.998732
Gm17324	1.03605	-2.67518	1.37525	-1.94522	0.051748	0.998732
Tmem234	398.559	-0.173235	0.0890581	-1.94519	0.0517525	0.998732
Gm26645	1.47425	2.20988	1.13645	1.94454	0.0518298	0.998732
Col11a1	74.5103	-0.583809	0.300249	-1.94442	0.051845	0.998732
Mir5119	1.59295	-1.80271	0.927527	-1.94357	0.0519473	0.998732
Ctdnep1	146.071	0.246127	0.126645	1.94343	0.0519638	0.998732
Cct3	490.838	0.228842	0.117789	1.94281	0.0520394	0.998732
Tspan5	676.979	0.259638	0.1337	1.94194	0.0521443	0.998732
Nrf1	150.427	0.254755	0.131188	1.94191	0.0521476	0.998732
Memo1	23.3671	0.672643	0.346391	1.94186	0.0521538	0.998732
Glipr2	26.3084	0.515574	0.265533	1.94166	0.0521789	0.998732
Rps4x	56.3288	0.40565	0.208945	1.94142	0.0522074	0.998732
Lnx2	84.9334	0.44847	0.231116	1.94045	0.0523247	0.998732
Vaultrc5	3.10935	2.10186	1.0832	1.94042	0.0523289	0.998732
Slc12a2	649.236	-0.199225	0.102726	-1.93938	0.0524549	0.998732
Chad	1.66901	-1.75964	0.907495	-1.93901	0.0525003	0.998732
Colgalt1	188.396	-0.226652	0.1169	-1.93885	0.0525196	0.998732
Polr3a	80.1057	-0.270007	0.139307	-1.93821	0.0525977	0.998732
Stim1	187.655	-0.438835	0.226446	-1.93793	0.0526322	0.998732
Hspb1	221.276	0.449842	0.232275	1.93668	0.0527846	0.998732
Saysd1	31.5744	0.578256	0.298584	1.93666	0.0527868	0.998732
BC065397	56.1244	0.413408	0.213482	1.9365	0.0528062	0.998732
Zfp930	13.791	-0.709418	0.36639	-1.93624	0.0528384	0.998732
E130114P18Rik	34.63	0.477436	0.246623	1.93589	0.052881	0.998732
Alkbh8	223.231	-0.245888	0.127032	-1.93564	0.0529114	0.998732
F11r	48.7255	-0.420408	0.217253	-1.93511	0.0529769	0.998732
Ptp4a2	1389	-0.15811	0.0817094	-1.93503	0.0529871	0.998732
Syp	763.261	0.208523	0.10777	1.9349	0.0530028	0.998732
Leo1	243.066	-0.22547	0.116574	-1.93414	0.0530957	0.998732
Ncoa5	172.129	0.263314	0.13614	1.93414	0.0530964	0.998732
Ackr3	24.4398	0.463244	0.239548	1.93383	0.0531342	0.998732
Ccdc90b	63.3518	0.368626	0.190691	1.9331	0.0532236	0.998732
Gtpbp4	317.774	-0.157603	0.08159	-1.93165	0.0534033	0.998732
Dynll1	342.516	0.230144	0.119161	1.93137	0.0534373	0.998732
Uba2	152.475	0.279311	0.14464	1.93108	0.053473	0.998732
Kdsr	235.891	0.247629	0.128266	1.93059	0.0535338	0.998732
Gpd1l	178.175	0.208069	0.10778	1.9305	0.053545	0.998732
Fer	227.268	-0.286249	0.148312	-1.93005	0.0536012	0.998732
Tfap2a	27.1084	0.495757	0.256879	1.92992	0.0536165	0.998732
Stk26	7.56889	-0.923272	0.478724	-1.92861	0.0537792	0.998732
Cnot7	260.6	0.267247	0.138589	1.92835	0.0538115	0.998732
Spcs3	66.9668	0.585826	0.303919	1.92758	0.053908	0.998732
Anp32e	667.809	0.180399	0.0936382	1.92655	0.0540357	0.998732
Dedd	155.337	0.239803	0.12451	1.92597	0.0541076	0.998732
Cdc25a	141.214	-0.234722	0.121874	-1.92593	0.0541125	0.998732
Ccnk	239.79	0.301997	0.15684	1.92551	0.0541654	0.998732
Mgam	1.46558	2.77659	1.44388	1.923	0.0544798	0.998732
C1ql1	38.174	-0.676492	0.351892	-1.92244	0.05455	0.998732
Cdk2ap2	143.487	0.337747	0.175732	1.92194	0.0546137	0.998732
Irak3	6.08126	-0.974119	0.506894	-1.92174	0.0546384	0.998732
Trmt1l	188.89	0.286438	0.149087	1.92128	0.0546962	0.998732
Cdk14	575.983	-0.297658	0.155031	-1.91999	0.0548598	0.998732
Ccdc42	0.997539	2.86216	1.49076	1.91993	0.0548673	0.998732
Sall2	245.461	0.254197	0.132434	1.91942	0.0549314	0.998732
Mier2	99.6859	0.367206	0.191327	1.91926	0.0549519	0.998732
RP23-303M15,7	13.6997	-0.565675	0.29477	-1.91904	0.054979	0.998732
Plod2	72.5017	0.350379	0.182601	1.91882	0.0550071	0.998732
Golga4	1055.95	-0.252607	0.13166	-1.91864	0.0550304	0.998732
Hgs	175.592	0.244871	0.127652	1.91828	0.0550761	0.998732
Lasp1	433.559	0.25535	0.133179	1.91734	0.0551943	0.998732
3110057O12Rik	100.067	-0.30489	0.159027	-1.91723	0.0552091	0.998732
Pard6b	18.0623	-0.701098	0.366029	-1.91541	0.0554398	0.998732
Stk24	73.3027	0.320987	0.167583	1.91539	0.0554424	0.998732
Glmp	106.124	0.29806	0.155762	1.91356	0.0556768	0.998732
Fat4	11.5231	-0.756975	0.395731	-1.91285	0.0557669	0.998732
Pcbp1	546.825	0.238395	0.124674	1.91214	0.0558577	0.998732
Oxt	1.62662	2.37322	1.24117	1.91208	0.0558664	0.998732
Gm2962	17.0121	0.770138	0.402789	1.91202	0.0558742	0.998732
Hsp90b1	1402.56	0.276605	0.144676	1.91189	0.0558901	0.998732
Ube2g2	148.029	0.381979	0.199853	1.9113	0.0559659	0.998732
Rps2-ps5	1.72903	2.03366	1.06409	1.91117	0.0559829	0.998732
Eif5b	1735.31	-0.174963	0.0915575	-1.91096	0.0560098	0.998732
BC017643	107.803	0.310934	0.162773	1.91023	0.0561034	0.998732
Smad3	162.244	0.327272	0.171422	1.90916	0.0562412	0.998732
Ank2	3347.62	-0.290162	0.15203	-1.90858	0.0563166	0.998732
Gm16299	3.57848	1.65174	0.865676	1.90804	0.0563865	0.998732
Arpc3	307.009	0.218745	0.114682	1.90741	0.056468	0.998732
Neo1	370.859	0.210751	0.110506	1.90714	0.0565019	0.998732
Ano4	58.3524	-0.403276	0.211528	-1.90649	0.0565866	0.998732
Ankra2	292.543	-0.242741	0.127323	-1.90649	0.0565867	0.998732
Slc39a2	39.2259	0.495756	0.260103	1.906	0.0566508	0.998732
Mllt1	40.6206	0.46949	0.246329	1.90595	0.0566566	0.998732
Zranb2	1414.78	-0.20421	0.107153	-1.90577	0.0566795	0.998732
Pdzd8	319.624	-0.22823	0.119762	-1.9057	0.0566894	0.998732
Tmem87b	346.562	-0.196807	0.103273	-1.90569	0.0566911	0.998732
Pnldc1	1.69085	2.42858	1.27457	1.90541	0.0567266	0.998732
Cyba	14.8909	0.592101	0.310774	1.90525	0.0567482	0.998732
RP24-372I24,2	3.84877	1.48667	0.780492	1.90479	0.056808	0.998732
Gm12022	1.48136	-2.1048	1.1051	-1.90463	0.0568276	0.998732
Fignl2	29.7057	-0.51336	0.269532	-1.90463	0.0568277	0.998732
RP24-546N2,5	9.8655	-0.916884	0.481419	-1.90455	0.056839	0.998732
Smarce1	122.663	0.25832	0.135659	1.90419	0.0568857	0.998732
Pdia5	5.68998	1.05637	0.554818	1.904	0.0569104	0.998732
Gas2l3	16.1961	-0.648844	0.340822	-1.90376	0.0569408	0.998732
Dennd2d	4.34491	1.19318	0.626897	1.90331	0.0570006	0.998732
Gorab	55.0209	-0.363248	0.190885	-1.90297	0.0570451	0.998732
Itgb1	315.297	-0.179032	0.0940867	-1.90284	0.0570613	0.998732
Rab43	93.5559	0.416466	0.218872	1.90278	0.057069	0.998732
Dad1	360.449	0.19742	0.103781	1.90226	0.0571367	0.998732
Fbxo28	268.162	0.153895	0.0809161	1.90191	0.0571833	0.998732
Gm6292	24.9044	-0.543832	0.286243	-1.8999	0.0574467	0.998732
Plek2	3.60015	1.44748	0.761996	1.89959	0.0574868	0.998732
Upp2	100.663	0.31682	0.166818	1.89919	0.0575389	0.998732
Ermn	441.476	-0.269232	0.141793	-1.89877	0.0575953	0.998732
Brdt	84.2261	0.239776	0.12629	1.89861	0.0576156	0.998732
Ankrd40	642.78	0.17279	0.0910196	1.89838	0.0576455	0.998732
Marf1	543.547	-0.313784	0.165291	-1.89837	0.0576475	0.998732
Larp7	127.331	-0.338522	0.178323	-1.89836	0.0576481	0.998732
Rpap3	112.08	-0.300091	0.158079	-1.89836	0.057649	0.998732
Foxp2	183.173	0.44294	0.233368	1.89803	0.0576922	0.998732
Nhlrc1	60.6643	0.401344	0.211473	1.89784	0.0577167	0.998732
Bpnt1	177.094	0.34769	0.183207	1.8978	0.0577228	0.998732
Paxip1	75.0651	0.373122	0.196634	1.89754	0.0577565	0.998732
Nubp2	105.394	0.247799	0.13059	1.89753	0.0577575	0.998732
Syk	6.27621	-1.00348	0.52889	-1.89734	0.0577837	0.998732
Rassf9	10.9616	-0.759493	0.40031	-1.89726	0.0577933	0.998732
Dram2	78.1762	0.33026	0.17408	1.89718	0.0578047	0.998732
Cetn3	1525.81	-0.248077	0.130789	-1.89678	0.0578576	0.998732
Brinp1	525.431	-0.221846	0.116996	-1.89619	0.0579347	0.998732
Tmem251	32.8054	0.451049	0.237925	1.89576	0.0579916	0.998732
Parp1	258.26	0.206899	0.109162	1.89534	0.0580472	0.998732
Zbtb2	42.3783	0.39069	0.206288	1.8939	0.0582378	0.998732
Huwe1	1269.65	-0.242585	0.128127	-1.89331	0.0583166	0.998732
Abcb1b	8.55634	-0.843213	0.445409	-1.89312	0.0583418	0.998732
Urb1	21.7544	0.605031	0.319604	1.89307	0.0583492	0.998732
Gpalpp1	92.14	-0.285112	0.150611	-1.89304	0.0583522	0.998732
Dnah3	2.88547	1.54555	0.816505	1.89289	0.0583728	0.998732
H2-Ob	0.824822	2.81277	1.4862	1.8926	0.0584115	0.998732
Ints3	131.988	0.267076	0.141117	1.89259	0.0584127	0.998732
CAAA01187608,3	5.41318	1.43543	0.758501	1.89245	0.058431	0.998732
Gpx7	8.90325	0.765529	0.404677	1.8917	0.0585306	0.998732
Calu	290.553	0.282909	0.149567	1.89152	0.0585552	0.998732
Dusp8	414.506	0.19934	0.105476	1.88991	0.0587694	0.998732
Ift88	78.6416	-0.433324	0.229325	-1.88956	0.0588163	0.998732
Hmgb1-rs16	12.6492	-0.712621	0.377216	-1.88916	0.0588703	0.998732
Ccdc61	16.1701	0.66563	0.352356	1.88908	0.058881	0.998732
Gm12744	0.730621	-3.55453	1.88289	-1.88781	0.0590521	0.998732
RP24-142E6,4	79.1393	-0.409826	0.217111	-1.88763	0.0590751	0.998732
Eps8l2	65.9467	0.452623	0.239786	1.88761	0.0590787	0.998732
Setdb2	10.9729	-0.791162	0.419143	-1.88757	0.0590838	0.998732
Serf1	95.3635	0.300966	0.159461	1.88739	0.0591073	0.998732
Spin1	164.477	0.375965	0.199254	1.88686	0.0591793	0.998732
Gm11992	2.71716	1.94811	1.0325	1.88679	0.059189	0.998732
Rpl21-ps12	2.66627	-1.48081	0.78495	-1.8865	0.0592276	0.998732
Dlg4	940.901	0.302905	0.160583	1.88628	0.059257	0.998732
Baz2a	476.578	-0.288322	0.15287	-1.88607	0.059286	0.998732
RP24-186G5,3	33.4824	-0.563094	0.298605	-1.88575	0.0593287	0.998732
Arpc1a	433.711	0.294884	0.15647	1.88461	0.0594828	0.998732
Bbs7	33.2592	0.458792	0.243503	1.88413	0.0595472	0.998732
Mapk6	246.135	-0.272224	0.144537	-1.88341	0.0596445	0.998732
Immt	482.298	-0.199827	0.106131	-1.88283	0.0597238	0.998732
Snord8	0.664267	-3.10649	1.65028	-1.8824	0.0597817	0.998732
Stam2	80.7532	-0.340171	0.180714	-1.88237	0.0597853	0.998732
4833439L19Rik	198.319	0.403638	0.214468	1.88204	0.0598302	0.998732
Map3k7	227.308	0.264788	0.140724	1.88161	0.0598895	0.998732
2810025M15Rik	69.3411	0.315333	0.167602	1.88144	0.0599125	0.998732
Gpank1	135.261	-0.250865	0.133347	-1.88129	0.0599326	0.998732
Cks2	2.11032	1.91721	1.0196	1.88036	0.0600588	0.998732
Mcm5	21.8156	-0.557054	0.296434	-1.87918	0.0602193	0.998732
Fads1	552.357	0.20142	0.107218	1.8786	0.060299	0.998732
Bfsp1	6.19061	1.25981	0.670733	1.87826	0.060345	0.998732
Ubac1	247.637	0.2142	0.114053	1.87807	0.0603712	0.998732
Gm6910	8.85878	-0.799193	0.425677	-1.87746	0.0604548	0.998732
Rnf149	51.2101	-0.434056	0.231215	-1.87728	0.0604792	0.998732
P2rx6	10.5608	-0.910601	0.485081	-1.87722	0.0604885	0.998732
Cacna1e	440.34	-0.257257	0.137046	-1.87717	0.0604955	0.998732
Mmgt1	134.937	0.259282	0.138159	1.87669	0.0605608	0.998732
Gm12337	63.4393	0.419293	0.223444	1.8765	0.0605866	0.998732
Mlf1	7.01644	-0.923592	0.492212	-1.87641	0.0605988	0.998732
Gm28455	1.08632	3.15884	1.68403	1.87576	0.0606877	0.998732
Adamts15	33.9316	0.419978	0.224023	1.87471	0.0608329	0.998732
Rbm24	55.9439	0.398736	0.212734	1.87434	0.0608836	0.998732
Slc35b1	377.501	0.184213	0.098311	1.87378	0.0609608	0.998732
Gm14033	174.344	0.42834	0.228637	1.87345	0.0610067	0.998732
Atp11c	150.617	-0.35463	0.189301	-1.87336	0.0610184	0.998732
Gm17382	4.75016	-1.18207	0.631022	-1.87326	0.0610327	0.998732
Gm26615	2.84509	-1.86546	0.996083	-1.87279	0.0610969	0.998732
Cbx7	324.537	0.319214	0.170453	1.87274	0.0611048	0.998732
Ak7	8.57702	0.888535	0.474679	1.87187	0.0612252	0.998732
Ago1	185.234	0.228643	0.122172	1.87148	0.0612782	0.998732
Cdc42ep3	52.8393	0.494739	0.264412	1.87109	0.061332	0.998732
Phf20l1	518.664	-0.238218	0.127353	-1.87052	0.0614111	0.998732
Tmem184b	159.856	0.261677	0.139907	1.87037	0.0614321	0.998732
Gm10489	0.918597	-2.95461	1.58001	-1.87	0.0614842	0.998732
Crebl2	194.206	0.282007	0.150828	1.86973	0.0615215	0.998732
Nr1d1	158.357	-0.322279	0.172391	-1.86947	0.0615579	0.998732
Bap1	148.186	0.193044	0.103292	1.86891	0.0616356	0.998732
Gm8036	6.42532	-1.19142	0.637519	-1.86884	0.0616444	0.998732
Gm5867	5.40514	-1.07396	0.574712	-1.86869	0.0616654	0.998732
Gpatch2l	42.4605	-0.36254	0.194085	-1.86795	0.0617694	0.998732
Dcun1d5	142.975	0.305617	0.163616	1.86789	0.061778	0.998732
Tlk1	369.965	-0.212682	0.113888	-1.86748	0.0618348	0.998732
Oaz1-ps	5.5706	0.921435	0.493591	1.8668	0.0619294	0.998732
Pcnx	277.18	0.257733	0.138107	1.86618	0.0620156	0.998732
Mtmr14	66.2347	0.291195	0.15606	1.86592	0.0620529	0.998732
Uxs1	230.549	-0.237599	0.127398	-1.86502	0.0621787	0.998732
Jmjd4	28.7325	-0.588679	0.315645	-1.865	0.0621809	0.998732
Tmem60	91.2717	0.292913	0.157061	1.86497	0.0621862	0.998732
Gtpbp1	342.477	0.245781	0.131858	1.86399	0.0623231	0.998732
Zfp608	239.92	-0.346457	0.18592	-1.86348	0.0623953	0.998732
Dock4	81.6656	-0.51315	0.275505	-1.86258	0.0625214	0.998732
Dnaja4	134.523	0.224126	0.120351	1.86227	0.062565	0.998732
Sf1	802.139	0.311214	0.167227	1.86103	0.0627401	0.998732
Cdkn1a	221.777	0.328703	0.176792	1.85927	0.0629893	0.998732
Secisbp2l	524.157	-0.22034	0.118512	-1.85922	0.0629958	0.998732
Arih1	485.671	0.183494	0.0987494	1.85817	0.0631443	0.998732
Spag5	117.812	0.265189	0.142726	1.85803	0.0631642	0.998732
Htr4	2.48896	2.14326	1.15368	1.85775	0.0632038	0.998732
Rpl3-ps2	2.4609	1.87046	1.00703	1.85741	0.0632533	0.998732
Depdc7	7.19099	0.855039	0.460675	1.85606	0.0634452	0.998732
Pax2	65.2116	-0.467374	0.25181	-1.85605	0.0634458	0.998732
Fndc1	4.60082	1.21508	0.654758	1.85577	0.0634858	0.998732
Zfp560	30.2308	-0.459948	0.247872	-1.85559	0.0635123	0.998732
Gclm	432.179	-0.220161	0.118649	-1.85557	0.0635156	0.998732
AI597479	114.386	0.268122	0.144566	1.85467	0.0636436	0.998732
Tmem82	4.1901	1.36079	0.73373	1.85462	0.0636504	0.998732
Gpr19	46.3928	0.423228	0.228321	1.85365	0.0637891	0.998732
Ly6g6e	1.24135	2.68214	1.44717	1.85337	0.0638297	0.998732
Pibf1	109.336	-0.325606	0.175693	-1.85327	0.0638438	0.998732
Lsm8	128.826	0.305684	0.164958	1.8531	0.0638687	0.998732
Rpl21-ps14	3.74726	1.54995	0.836612	1.85266	0.0639318	0.998732
Sdad1	125.139	-0.29167	0.157442	-1.85256	0.0639458	0.998732
Zfp91	966.119	-0.188198	0.101597	-1.8524	0.0639685	0.998732
Eral1	42.3802	0.395491	0.213566	1.85185	0.0640477	0.998732
2210013O21Rik	166.055	0.216077	0.116693	1.85167	0.0640727	0.998732
Txnrd3	53.5649	-0.409588	0.221243	-1.8513	0.0641267	0.998732
Gm28582	13.695	0.970346	0.52423	1.85099	0.0641705	0.998732
Spry4	53.8732	0.52701	0.284742	1.85083	0.0641937	0.998732
Ap2s1	272.002	0.523521	0.282906	1.85051	0.0642395	0.998732
Gabbr2	1168.64	0.181533	0.0980995	1.8505	0.0642414	0.998732
Srr	244.306	-0.275677	0.148974	-1.8505	0.0642415	0.998732
Prr13	448.284	0.225839	0.122105	1.84954	0.0643795	0.998732
9530068E07Rik	208.31	0.311948	0.168723	1.84888	0.0644758	0.998732
Ifi204	1.18343	2.58231	1.39679	1.84874	0.0644953	0.998732
Fstl4	76.1599	-0.362236	0.195951	-1.8486	0.0645155	0.998732
Gabra1	2113.46	0.240531	0.130138	1.84828	0.0645622	0.998732
Hist1h3d	1.94726	2.51378	1.36089	1.84715	0.0647251	0.998732
Hdac10	31.8943	-0.526216	0.28498	-1.8465	0.0648192	0.998732
Usp30	83.6754	0.290631	0.157409	1.84634	0.0648428	0.998732
Alg11	335.025	-0.248246	0.134521	-1.84542	0.0649771	0.998732
Zfp442	18.0865	-0.537093	0.291065	-1.84527	0.064999	0.998732
Kcnj3	447.933	0.194683	0.105505	1.84525	0.0650007	0.998732
Tbc1d7	32.9642	-0.364375	0.197505	-1.84489	0.065054	0.998732
Fbxw7	1763.76	-0.225971	0.122502	-1.84463	0.0650912	0.998732
Cadm1	924.635	0.183031	0.0992354	1.84441	0.0651237	0.998732
RP23-317L18,3	82.2755	-0.39454	0.213915	-1.84437	0.0651287	0.998732
Itch	263.888	-0.312287	0.169326	-1.8443	0.0651398	0.998732
Pde8a	74.1111	-0.373199	0.202387	-1.84399	0.0651847	0.998732
Nfam1	2.75674	1.50862	0.818235	1.84375	0.0652191	0.998732
Pik3cg	4.03969	1.30829	0.709658	1.84355	0.0652492	0.998732
1110001J03Rik	588.939	0.295962	0.160593	1.84293	0.0653392	0.998732
Farp2	21.5774	0.488014	0.264867	1.84249	0.0654035	0.998732
Gm17281	17.4979	-0.56388	0.306066	-1.84235	0.0654241	0.998732
Hnmt	76.6352	0.367638	0.19964	1.8415	0.065548	0.998732
C330027C09Rik	11.145	-0.726006	0.394281	-1.84134	0.0655713	0.998732
Pvalb	3135.92	0.324924	0.176546	1.84045	0.0657024	0.998732
Prdm11	76.2051	-0.319606	0.173665	-1.84036	0.0657155	0.998732
Acadl	203.668	-0.257622	0.139991	-1.84028	0.0657276	0.998732
Brca2	54.5791	-0.450573	0.24495	-1.83945	0.065849	0.998732
Gm26070	22.8707	-0.652799	0.354912	-1.83933	0.0658668	0.998732
Rpl41	97.4665	0.387066	0.21051	1.8387	0.0659587	0.998732
Pdzd2	55.0844	-0.421553	0.229324	-1.83824	0.0660269	0.998732
Gid8	201	0.261156	0.142161	1.83704	0.0662041	0.998732
Ift57	141.927	0.271947	0.148051	1.83684	0.0662331	0.998732
4930479D17Rik	1.1683	3.25822	1.7743	1.83634	0.0663071	0.998732
Ciart	49.6304	-0.369848	0.201558	-1.83495	0.0665133	0.998732
Csrp2bp	63.7731	0.345411	0.188266	1.83469	0.066551	0.998732
Rpl7l1	120.317	0.264037	0.143918	1.83463	0.0665602	0.998732
RP24-571N3,1	17.5062	-0.571957	0.311796	-1.8344	0.066595	0.998732
Gpatch8	766.605	-0.147103	0.0802044	-1.8341	0.0666397	0.998732
Prdx1	696.733	0.229356	0.125074	1.83376	0.0666897	0.998732
Rgcc	34.2746	0.489349	0.266906	1.83341	0.0667411	0.998732
Six5	12.7388	0.604867	0.330068	1.83255	0.066869	0.998732
Ptpdc1	62.9678	-0.298172	0.162761	-1.83196	0.0669569	0.998732
Dtymk	63.5431	0.360124	0.196597	1.83179	0.0669834	0.998732
Prima1	6.15549	-1.1466	0.62596	-1.83175	0.0669894	0.998732
Slc6a3	2.06915	2.67611	1.46099	1.83172	0.0669938	0.998732
Hspa5	3067.92	0.312119	0.170403	1.83165	0.067004	0.998732
Ddx17	1353.56	0.194511	0.106225	1.83112	0.0670821	0.998732
Gm15745	29.3166	-0.566636	0.309503	-1.83079	0.0671317	0.998732
Ppm1n	2.76291	-1.38412	0.756112	-1.83058	0.0671634	0.998732
Efemp1	26.2141	0.518468	0.283243	1.83047	0.0671796	0.998732
Smyd2	179.983	0.235588	0.128707	1.83042	0.0671866	0.998732
Gm26624	2.98624	-1.58893	0.868212	-1.83011	0.0672333	0.998732
Rnf181	237.968	0.25721	0.14056	1.82989	0.0672659	0.998732
Abcc6	1.65659	2.49314	1.36245	1.82989	0.0672659	0.998732
Bri3	27.7072	0.596399	0.325988	1.82951	0.0673235	0.998732
Ildr1	2.85114	-1.56077	0.853114	-1.82949	0.0673255	0.998732
Hdac4	294.99	0.202334	0.110598	1.82945	0.0673319	0.998732
Stx6	178.98	0.257858	0.140956	1.82936	0.067346	0.998732
Clybl	219.032	-0.230762	0.126183	-1.82879	0.0674308	0.998732
Ap1g1	563.521	-0.15683	0.0857637	-1.82863	0.0674551	0.998732
Gm15212	0.699559	-3.49615	1.9119	-1.82862	0.0674561	0.998732
Ccdc124	108.893	0.253518	0.138661	1.82833	0.0674998	0.998732
Ddx59	27.5865	0.494924	0.27078	1.82777	0.0675838	0.998732
Atm	157.167	-0.245473	0.134322	-1.8275	0.067624	0.998732
Slc38a1	2073.8	0.213746	0.116963	1.82746	0.0676301	0.998732
Slc6a17	223.705	0.233381	0.127721	1.82727	0.0676599	0.998732
Eml3	95.8031	-0.273039	0.149433	-1.82717	0.0676743	0.998732
Fam102b	220.57	0.229364	0.125539	1.82704	0.0676939	0.998732
Cct8	805.637	0.179552	0.0982801	1.82694	0.0677082	0.998732
Rnf166	152.219	0.288106	0.157703	1.8269	0.0677154	0.998732
Dcun1d2	102.193	0.318302	0.174257	1.82663	0.067756	0.998732
Tirap	14.756	-0.611663	0.334927	-1.82626	0.067811	0.998732
Ndufc2	1079.43	0.228882	0.125355	1.82588	0.0678688	0.998732
Fzd3	91.6592	-0.384259	0.210468	-1.82574	0.0678896	0.998732
B3gat3	243.074	0.199998	0.109583	1.82508	0.0679892	0.998732
Rusc2	366.017	0.330034	0.180843	1.82497	0.0680058	0.998732
Gpr137b-ps	27.6266	-0.498033	0.272997	-1.82431	0.0681045	0.998732
RP23-303M15,3	23.2741	-0.548851	0.300942	-1.82378	0.0681858	0.998732
Sltm	1358.51	-0.189097	0.103706	-1.8234	0.0682435	0.998732
Slc18b1	44.0261	0.432818	0.237432	1.82291	0.0683171	0.998732
Nptx1	1333.67	0.268956	0.147587	1.82236	0.0684002	0.998732
Tdrd7	84.0253	0.538898	0.295768	1.82203	0.0684506	0.998732
Ttll9	10.3936	0.738474	0.405305	1.82202	0.0684521	0.998732
Gm12618	1.8595	-1.75663	0.964349	-1.82157	0.0685207	0.998732
Dnah7b	34.3617	-0.53258	0.29241	-1.82134	0.0685545	0.998732
Dscaml1	45.7213	0.411311	0.225851	1.82116	0.0685822	0.998732
Dstn	903.712	-0.25744	0.141375	-1.82097	0.0686112	0.998732
Kcna1	3107.07	-0.178231	0.0978773	-1.82096	0.0686125	0.998732
Plin2	30.2599	-0.476496	0.261681	-1.82091	0.0686212	0.998732
Arrdc4	15.0362	-0.50805	0.27906	-1.82058	0.0686714	0.998732
Selk	650.079	0.170712	0.0937885	1.82019	0.0687308	0.998732
Aldh5a1	205.371	0.23311	0.128103	1.81971	0.0688034	0.998732
Fbxl22	12.9615	0.896162	0.492706	1.81886	0.068933	0.998732
Mir7078	2.15815	1.88624	1.03718	1.81862	0.0689693	0.998732
2610020H08Rik	7.24463	0.915503	0.503418	1.81857	0.0689766	0.998732
Gm10647	3.24583	1.38167	0.759919	1.81818	0.0690367	0.998732
Gm4524	2.37681	1.9196	1.05595	1.81789	0.0690817	0.998732
2010007H06Rik	9.50995	0.897803	0.493982	1.81748	0.0691433	0.998732
Ppp1cb	600.691	0.296221	0.162987	1.81745	0.0691478	0.998732
Ercc6	63.2465	-0.320808	0.176548	-1.81711	0.0692	0.998732
Dclk2	164.898	0.229179	0.12614	1.81686	0.0692386	0.998732
Epm2a	68.777	-0.34634	0.190672	-1.81641	0.0693073	0.998732
Rcor1	220.751	0.237632	0.130827	1.81638	0.069312	0.998732
Csdc2	136.757	0.284233	0.156495	1.81625	0.0693323	0.998732
Prdm16	44.9265	0.553446	0.304727	1.81621	0.0693389	0.998732
Kcna5	1.90342	-1.75006	0.963612	-1.81615	0.0693477	0.998732
Trpc4ap	445.692	0.16112	0.0887224	1.816	0.0693701	0.998732
Trip12	837.056	-0.207544	0.1143	-1.81579	0.0694026	0.998732
4930402H24Rik	375.862	0.151104	0.083242	1.81524	0.0694867	0.998732
Tbc1d9b	682.867	-0.239524	0.131983	-1.8148	0.0695544	0.998732
Bcl7a	413.531	-0.332509	0.183349	-1.81353	0.0697505	0.998732
Glra1	889.281	-0.701961	0.3871	-1.81338	0.0697725	0.998732
Snapin	161.684	-0.218124	0.120342	-1.81254	0.069903	0.998732
Pim3	533.354	0.219354	0.121056	1.812	0.0699855	0.998732
Gm10169	12.3705	0.681577	0.37629	1.81131	0.070093	0.998732
Ubr5	641.42	-0.195104	0.107721	-1.81119	0.0701108	0.998732
Cenpc1	180.605	-0.324699	0.179403	-1.80989	0.0703127	0.998732
Abca6	4.91793	-1.05181	0.5812	-1.80971	0.0703404	0.998732
RP24-151O6,1	14.9696	-0.691933	0.382594	-1.80853	0.0705238	0.998732
Wrap73	150.593	0.297416	0.164457	1.80847	0.0705327	0.998732
Stx16	447.181	0.20989	0.11607	1.80831	0.0705585	0.998732
Gm15427	410.965	-0.257476	0.142416	-1.80791	0.070621	0.998732
Acss1	56.9904	0.395246	0.218622	1.8079	0.0706218	0.998732
Dpf1	158.319	-0.285785	0.158078	-1.80788	0.0706258	0.998732
Pex2	26.7453	0.520711	0.288064	1.80762	0.0706658	0.998732
RP24-172H5,1	2.16771	-1.75257	0.969709	-1.80732	0.0707128	0.998732
Sec31a	350.091	0.206164	0.114111	1.80671	0.0708081	0.998732
Nfatc1	20.6559	0.540977	0.299428	1.8067	0.0708091	0.998732
Gm11652	7.51253	0.903987	0.500357	1.80669	0.0708112	0.998732
9530051G07Rik	24.6938	0.542236	0.300128	1.80668	0.0708118	0.998732
Sall3	25.8631	-0.706594	0.391182	-1.80631	0.0708706	0.998732
Mettl25	22.7528	0.619927	0.343293	1.80582	0.0709461	0.998732
Gpr1	0.832194	-2.83482	1.56984	-1.8058	0.0709497	0.998732
Ryr3	88.2166	-0.382213	0.211673	-1.80568	0.0709682	0.998732
Slc16a13	18.0448	-0.551073	0.305277	-1.80516	0.0710502	0.998732
Ppm1f	77.7611	0.312843	0.173346	1.80473	0.0711162	0.998732
AA467197	2.64584	1.76926	0.980754	1.80398	0.071235	0.998732
Gm29156	1.41842	2.75886	1.52984	1.80336	0.0713312	0.998732
Zfp961	59.5758	0.431945	0.239541	1.80322	0.071353	0.998732
Arhgap20	345.611	-0.225683	0.125224	-1.80224	0.0715078	0.998732
Rpl27a	485.638	0.223982	0.124317	1.80171	0.0715916	0.998732
Gm15624	10.941	-0.716963	0.398118	-1.80088	0.0717222	0.998732
Gm12166	16.0442	0.909228	0.504976	1.80054	0.071776	0.998732
Nsmce2	101.813	0.304645	0.169213	1.80037	0.0718029	0.998732
Slc7a6os	65.817	-0.293064	0.162825	-1.79987	0.0718809	0.998732
Cir1	235.142	-0.241525	0.134192	-1.79984	0.0718853	0.998732
Mrpl48-ps	48.8628	-0.636232	0.353524	-1.79969	0.0719102	0.998732
Helb	29.2432	-0.442298	0.245832	-1.79919	0.0719885	0.998732
9330154J02Rik	16.6713	-0.649335	0.361389	-1.79678	0.0723708	0.998732
Tomm5	23.955	0.638894	0.355582	1.79676	0.0723742	0.998732
Cpxm1	4.61543	-1.16202	0.646741	-1.79674	0.0723773	0.998732
Gm16958	2.10059	-1.86905	1.04037	-1.79652	0.0724117	0.998732
Gm6467	12.5694	0.649843	0.361748	1.7964	0.072431	0.998732
Cdc42bpa	1692.15	-0.211393	0.117716	-1.79579	0.0725276	0.998732
Vip	13.8502	0.803947	0.447982	1.7946	0.0727182	0.998732
Ikbip	120.629	-0.258112	0.143852	-1.79428	0.0727679	0.998732
Ankef1	7.45692	0.949482	0.529549	1.793	0.0729728	0.998732
Sbk1	780.247	0.321522	0.179345	1.79276	0.0730118	0.998732
Polr1a	94.6657	-0.275257	0.153557	-1.79254	0.0730469	0.998732
Gm26513	1.85696	-1.88246	1.05025	-1.79239	0.0730703	0.998732
2310034G01Rik	5.06743	1.1105	0.619569	1.79238	0.0730727	0.998732
Atg2a	164.367	0.238473	0.133054	1.79231	0.0730839	0.998732
Dclk1	1652.72	0.15869	0.0885842	1.79141	0.0732277	0.998732
Eno1b	7.60491	-1.07163	0.598294	-1.79114	0.0732714	0.998732
Tbc1d13	133.634	0.283404	0.158276	1.79057	0.0733624	0.998732
RP23-128G10,6	13.8475	-0.64617	0.360937	-1.79025	0.0734132	0.998732
Gm14246	17.5208	0.707883	0.395425	1.79018	0.0734242	0.998732
Ripk2	14.3022	0.572695	0.319941	1.79	0.0734535	0.998732
Akap6	721.518	-0.236386	0.132096	-1.7895	0.0735342	0.998732
Lrrn4cl	2.0824	1.56323	0.873725	1.78916	0.0735888	0.998732
Slc35e1	66.1035	0.286022	0.159887	1.7889	0.0736313	0.998732
Adam4	9.23038	-0.926696	0.518122	-1.78857	0.0736846	0.998732
Slc22a15	78.1163	0.348602	0.19498	1.78789	0.0737935	0.998732
Gm26523	4.26944	0.959984	0.536968	1.78778	0.0738107	0.998732
Nifk	150.995	-0.260242	0.145668	-1.78654	0.0740114	0.998732
Commd6	52.682	0.311489	0.174367	1.78639	0.0740357	0.998732
Fcgr4	0.662203	-2.81904	1.57846	-1.78594	0.0741082	0.998732
Rangrf	10.2779	0.73251	0.41048	1.78452	0.0743388	0.998732
1810011O10Rik	6.87707	0.968283	0.542635	1.78441	0.074357	0.998732
Fam181b	184.975	0.27998	0.156949	1.78389	0.074441	0.998732
Gm16302	3.45894	1.52242	0.853569	1.78359	0.0744901	0.998732
Gm15032	3.22664	1.19421	0.669637	1.78336	0.0745274	0.998732
Snhg4	94.8524	0.398237	0.223333	1.78315	0.0745612	0.998732
Gramd1a	171.601	0.203028	0.113865	1.78306	0.0745757	0.998732
Fam131a	269.271	0.559585	0.313901	1.78268	0.0746382	0.998732
Tceb1	332.863	0.204863	0.11499	1.78158	0.074818	0.998732
Shoc2	369.892	-0.294762	0.165454	-1.78154	0.074824	0.998732
Setx	356.769	-0.257776	0.144703	-1.78141	0.0748453	0.998732
Dnajc8	868.293	-0.209878	0.117839	-1.78105	0.0749046	0.998732
Senp2	368.75	-0.182607	0.102534	-1.78095	0.074921	0.998732
Mov10	6.27843	0.869549	0.488411	1.78036	0.0750167	0.998732
RP23-16D16,13	31.2268	-0.451542	0.253645	-1.78021	0.0750419	0.998732
Chrm2	127.718	-0.435877	0.244857	-1.78013	0.0750552	0.998732
Arhgap21	817.699	-0.275677	0.154873	-1.78002	0.0750729	0.998732
Cstb	245.787	0.254739	0.143124	1.77985	0.0751005	0.998732
Taz	284.002	-0.189674	0.106583	-1.77958	0.0751439	0.998732
Sparcl1	16715.3	-0.269296	0.15133	-1.77953	0.0751529	0.998732
Zfp81	159.913	-0.291615	0.163875	-1.77949	0.0751594	0.998732
Frg1	368.353	-0.208185	0.117016	-1.77912	0.0752207	0.998732
Fpgs	24.5686	0.497487	0.279634	1.77906	0.0752299	0.998732
Mospd4	1.12975	2.47311	1.39026	1.77888	0.0752602	0.998732
Hexim1	339.882	0.249292	0.140143	1.77883	0.0752671	0.998732
Fam212b	58.7695	-0.397167	0.223309	-1.77855	0.0753134	0.998732
Galnt1	463.263	-0.17097	0.0961873	-1.77747	0.075491	0.998732
Ube4a	109.168	-0.320763	0.180461	-1.77746	0.0754926	0.998732
F2r	72.3307	0.429128	0.241748	1.77511	0.0758805	0.998732
Atp1b1	12174.7	-0.126586	0.0713131	-1.77507	0.0758862	0.998732
Ppp1r18	31.5066	0.491014	0.276632	1.77497	0.0759032	0.998732
Mief2	47.9231	0.451986	0.254834	1.77365	0.076121	0.998732
Exosc1	72.7034	-0.305037	0.172003	-1.77344	0.0761555	0.998732
Eya3	107.824	0.269796	0.15215	1.77322	0.0761919	0.998732
Gypa	1.85843	-1.5943	0.899128	-1.77317	0.0762009	0.998732
Soga1	141.616	-0.335593	0.189391	-1.77196	0.0764015	0.998732
Gm15596	1.00574	-2.18947	1.23571	-1.77183	0.0764236	0.998732
Pms1	62.374	-0.422092	0.238247	-1.77166	0.0764513	0.998732
Scn7a	7.91941	-0.781431	0.441117	-1.77148	0.0764803	0.998732
Ganab	330.128	0.18978	0.107157	1.77104	0.0765541	0.998732
Gm16155	1.19402	-2.43221	1.37336	-1.77099	0.0765626	0.998732
Dbp	264.615	-0.28225	0.159395	-1.77076	0.0765998	0.998732
Dnajb14	1158.9	-0.196691	0.11109	-1.77054	0.0766364	0.998732
Arhgef18	201.523	0.237331	0.134078	1.7701	0.0767103	0.998732
Tmem43	109.162	0.391114	0.220957	1.77009	0.0767118	0.998732
Psen2	174.577	0.206751	0.116848	1.7694	0.0768264	0.998732
Htra1	438.248	0.200558	0.113381	1.76889	0.0769128	0.998732
Myadm	95.758	0.309659	0.175082	1.76866	0.0769514	0.998732
Spns3	1.32507	2.75196	1.55599	1.76862	0.0769567	0.998732
Mfsd7c	10.2588	0.913487	0.516497	1.76862	0.0769574	0.998732
C1qtnf7	2.11534	1.97043	1.11421	1.76846	0.0769847	0.998732
Gm9885	22.029	-0.425146	0.240442	-1.76819	0.0770294	0.998732
Pdxdc1	142.107	-0.353141	0.199778	-1.76767	0.0771169	0.998732
Cml5	3.11709	1.57502	0.891448	1.76681	0.0772599	0.998732
Sema4b	74.3617	0.293822	0.166332	1.76648	0.0773152	0.998732
Erbb2ip	246.044	-0.280877	0.159022	-1.76628	0.0773493	0.998732
Ell	88.4343	0.337695	0.191236	1.76585	0.077421	0.998732
Fzd6	22.8518	-0.528071	0.299158	-1.76519	0.0775318	0.998732
Gm15578	24.5133	-0.668657	0.379237	-1.76317	0.0778725	0.998732
l7Rn6	119.274	0.300281	0.170327	1.76297	0.0779049	0.998732
Thnsl1	94.8138	-0.237922	0.134976	-1.7627	0.0779513	0.998732
Tpra1	194.507	0.23735	0.134685	1.76226	0.0780258	0.998732
A430105J06Rik	5.785	-0.962495	0.546237	-1.76205	0.0780615	0.998732
Zfp146	2.88777	-1.38983	0.788838	-1.76186	0.0780923	0.998732
4933433G15Rik	2.5897	-1.41375	0.802558	-1.76155	0.0781446	0.998732
Ppp4r4	188.9	-0.230573	0.130926	-1.76109	0.0782225	0.998732
Ccpg1os	25.129	0.481427	0.273414	1.7608	0.0782725	0.998732
Rps11-ps3	9.11344	0.701843	0.398723	1.76023	0.0783694	0.998732
Pip4k2c	263.783	0.25142	0.142985	1.75837	0.0786843	0.998732
Shroom4	21.0085	0.576678	0.328096	1.75765	0.0788069	0.998732
Actn3	3.72051	1.40047	0.797143	1.75686	0.0789423	0.998732
Iqsec1	1001.93	-0.213893	0.121751	-1.7568	0.0789519	0.998732
Orc5	64.1203	0.354253	0.201711	1.75625	0.0790466	0.998732
Dusp16	122.611	-0.299281	0.170526	-1.75504	0.0792518	0.998732
2410080I02Rik	7.67632	0.75348	0.429486	1.75438	0.079366	0.998732
Mgp	145.851	-0.398161	0.226959	-1.75434	0.0793731	0.998732
Tg	1.64272	-1.84532	1.05206	-1.754	0.0794303	0.998732
Mtap	92.2757	-0.263373	0.15018	-1.75371	0.0794802	0.998732
Nfkbil1	18.9625	-0.515174	0.293798	-1.7535	0.0795161	0.998732
Stard4	174.956	-0.239888	0.136816	-1.75336	0.0795394	0.998732
Ankrd16	110.607	-0.270438	0.154279	-1.75292	0.0796162	0.998732
Fam163a	17.4977	-0.680811	0.388408	-1.75282	0.0796326	0.998732
Gm10684	3.76028	-1.14449	0.652955	-1.75278	0.0796397	0.998732
RP24-113A5,1	4.85864	-0.957981	0.546552	-1.75277	0.0796413	0.998732
Fcf1	278.473	-0.181573	0.103631	-1.7521	0.0797558	0.998732
Ms4a7	1.87878	-1.82314	1.04061	-1.75198	0.0797766	0.998732
Sgpp1	162.675	0.345427	0.197174	1.75189	0.0797929	0.998732
Ska2l-ps	0.865188	-2.77628	1.585	-1.75159	0.0798439	0.998732
RP23-304O9,1	1.39763	-2.42375	1.38389	-1.7514	0.0798767	0.998732
Wbp11	239.224	-0.266843	0.152463	-1.75021	0.0800814	0.998732
Gm22813	30.6952	-0.391859	0.223965	-1.74964	0.0801796	0.998732
Noxred1	3.69729	1.37567	0.786275	1.74961	0.0801863	0.998732
Hmmr	1.5654	2.08228	1.19021	1.74951	0.0802033	0.998732
Gm10118	26.2071	-0.538294	0.3077	-1.74941	0.0802198	0.998732
2002-03-01	337.525	-0.180825	0.103371	-1.74928	0.0802428	0.998732
Tmem145	740.892	0.241157	0.137896	1.74883	0.0803206	0.998732
Asb15	1.06832	3.14436	1.79832	1.74849	0.0803788	0.998732
Zdhhc8	171.974	0.312052	0.178473	1.74846	0.0803848	0.998732
Akt3	419.274	-0.202805	0.115994	-1.74841	0.0803934	0.998732
Gpatch2	214.21	-0.217934	0.124688	-1.74783	0.080494	0.998732
Rnu3a	3.09906	-1.62713	0.931212	-1.74732	0.0805817	0.998732
Homer1	212.34	0.226031	0.129359	1.74731	0.080583	0.998732
Pole4	77.6104	0.271116	0.15523	1.74654	0.0807174	0.998732
Rhbdf1	46.2852	0.420505	0.240822	1.74612	0.0807892	0.998732
Snapc1	126.209	0.290445	0.166359	1.7459	0.0808288	0.998732
Dlc1	513.96	0.219685	0.125839	1.74577	0.0808514	0.998732
Ntn3	29.2279	0.450317	0.257952	1.74574	0.0808564	0.998732
Ier5	153.89	0.230986	0.132334	1.74548	0.0809012	0.998732
RP24-540L1,3	31.4927	-0.493432	0.282705	-1.7454	0.0809155	0.998732
Icmt	559.151	0.456986	0.261838	1.7453	0.0809326	0.998732
2006-03-01	317.251	0.197091	0.112972	1.7446	0.0810539	0.998732
Creb5	76.317	-0.405825	0.232647	-1.74438	0.0810923	0.998732
Zfp664	542.178	-0.200269	0.114808	-1.74438	0.081093	0.998732
Gm16287	9.8127	0.948589	0.544007	1.74371	0.0812102	0.998732
Tspan6	40.5819	0.424611	0.243523	1.74362	0.0812262	0.998732
BC025920	13.2101	-0.622086	0.356891	-1.74307	0.0813216	0.998732
Nthl1	6.40686	0.870034	0.499151	1.74303	0.0813286	0.998732
Wiz	186.966	0.225402	0.129319	1.74298	0.0813365	0.998732
Gm1976	50.6282	-0.340796	0.19553	-1.74293	0.0813456	0.998732
Sez6l	317.374	0.279172	0.160195	1.7427	0.0813861	0.998732
Tubb3	732.369	-0.276607	0.158761	-1.74229	0.081458	0.998732
Ggcx	42.2661	0.37611	0.215981	1.7414	0.0816133	0.998732
Stx11	0.737091	2.66259	1.52943	1.7409	0.0817009	0.998732
D930048G16Rik	1.19351	-2.12161	1.21911	-1.7403	0.081807	0.998732
Msra	125.285	0.282981	0.162614	1.7402	0.0818235	0.998732
Bcl2l11	41.7815	-0.396934	0.228133	-1.73993	0.081872	0.998732
Tial1	493.695	0.177389	0.10196	1.73979	0.081896	0.998732
Specc1	844.931	-0.195689	0.112494	-1.73955	0.0819376	0.998732
Dnajc27	352.23	-0.195298	0.112271	-1.73953	0.0819422	0.998732
Rpl5-ps1	0.825976	2.82228	1.62253	1.73943	0.0819592	0.998732
Gm16169	6.24593	-1.18272	0.68	-1.73929	0.081983	0.998732
Cstf2	733.897	-0.215516	0.123913	-1.73926	0.0819897	0.998732
Lias	364.136	-0.165603	0.0952483	-1.73865	0.0820965	0.998732
4933439C10Rik	68.4175	0.274038	0.157646	1.73831	0.0821554	0.998732
Sec14l1	516.597	0.283917	0.163376	1.73781	0.0822439	0.998732
Hddc3	110.027	-0.565219	0.325266	-1.73771	0.0822617	0.998732
Gm12992	10.9801	0.672419	0.386972	1.73764	0.0822739	0.998732
RP24-303N8,3	4.13267	-1.16692	0.671699	-1.73726	0.0823411	0.998732
Enkd1	23.1396	0.48165	0.27733	1.73674	0.082433	0.998732
Gm10480	269.24	0.291699	0.168025	1.73604	0.0825571	0.998732
Hr	132.638	0.398032	0.229358	1.73542	0.0826671	0.998732
Gja1	633.739	0.21086	0.121516	1.73525	0.0826972	0.998732
Braf	809.987	-0.191432	0.110325	-1.73517	0.0827112	0.998732
Olfml2a	7.758	0.849551	0.489621	1.73512	0.0827195	0.998732
Hepacam2	1.38376	2.14098	1.23399	1.735	0.0827408	0.998732
Ppp1r12c	331.774	0.223505	0.128828	1.73491	0.0827572	0.998732
Ccdc94	47.309	-0.409164	0.235915	-1.73437	0.0828527	0.998732
Enc1	320.056	0.483949	0.279064	1.73419	0.0828847	0.998732
Tmem9b	353.049	0.176067	0.101532	1.7341	0.0828996	0.998732
Pitpnb	206.724	0.208226	0.12011	1.73362	0.0829851	0.998732
RP23-13A13,6	63.5714	-0.325809	0.187944	-1.73354	0.0829997	0.998732
Pgr	142.838	0.22904	0.13214	1.73331	0.0830407	0.998732
Gabarap	416.963	0.199125	0.114889	1.73319	0.0830611	0.998732
Phlda1	147.795	0.242875	0.140147	1.733	0.0830959	0.998732
Carkd	136.212	0.263986	0.152348	1.73278	0.0831345	0.998732
Hspe1	391.883	0.350016	0.202043	1.73238	0.0832052	0.998732
Hsd17b4	118.97	0.306055	0.176705	1.73201	0.0832715	0.998732
Gm5121	4.46825	-1.04193	0.601617	-1.73188	0.0832941	0.998732
Gm5879	1.61542	1.94288	1.12227	1.73121	0.0834151	0.998732
2410022M11Rik	22.0452	-0.490601	0.283425	-1.73097	0.0834569	0.998732
Eya1	30.131	0.453927	0.262308	1.73051	0.0835388	0.998732
Tbpl1	296.891	0.248065	0.143348	1.73051	0.0835398	0.998732
Kcnq1	1.39087	2.10103	1.2146	1.72982	0.083663	0.998732
Sh3pxd2a	75.9673	0.306164	0.177008	1.72966	0.0836906	0.998732
Gm11889	8.10187	-0.805317	0.465597	-1.72964	0.083694	0.998732
Zfp112	11.8847	-0.592732	0.342801	-1.72909	0.0837937	0.998732
Minos1	415.587	0.159462	0.0922238	1.72908	0.0837946	0.998732
Hdac9	37.7335	0.395905	0.22897	1.72907	0.0837968	0.998732
Gpx2	12.4413	-1.3403	0.775175	-1.72902	0.083805	0.998732
Capzb	853.045	0.256686	0.148511	1.7284	0.0839172	0.998732
Vezt	314.074	-0.159939	0.0925624	-1.72791	0.0840052	0.998732
Fut4	2.17851	1.81557	1.05075	1.72788	0.0840096	0.998732
5430402O13Rik	4.23913	-1.36417	0.789664	-1.72753	0.0840726	0.998732
Hdhd3	21.9616	0.51009	0.295354	1.72705	0.0841593	0.998732
Plat	70.2567	0.420718	0.243609	1.72702	0.0841639	0.998732
Gm15453	2.32382	-1.41064	0.816846	-1.72694	0.0841789	0.998732
RP24-193D9,2	1.024	3.09536	1.79313	1.72623	0.0843054	0.998732
Gtf2h2	137.203	-0.282335	0.163664	-1.72509	0.0845113	0.998732
Atp5c1	678.902	0.166597	0.0965799	1.72496	0.0845344	0.998732
Mysm1	232.438	-0.265537	0.15394	-1.72494	0.0845386	0.998732
Pclo	3263.05	-0.262182	0.151996	-1.72492	0.0845413	0.998732
Haus7	12.6172	0.664136	0.38509	1.72462	0.0845952	0.998732
Mga	887.452	-0.208737	0.121062	-1.72422	0.0846686	0.998732
Casz1	77.0477	0.342898	0.198872	1.72422	0.0846688	0.998732
2009-03-01	104.336	0.295472	0.171464	1.72323	0.0848474	0.998732
Pptc7	1602.73	0.159296	0.092497	1.72218	0.0850372	0.998732
Tox4	225.648	0.176806	0.102665	1.72216	0.0850408	0.998732
Penk	477.651	0.232645	0.135092	1.72213	0.0850466	0.998732
Gng7	48.0918	0.363429	0.211051	1.722	0.08507	0.998732
Rnf144b	61.5699	0.329258	0.19122	1.72187	0.0850923	0.998732
Thrap3	388.811	-0.238389	0.138453	-1.7218	0.0851051	0.998732
Gm22392	5.82171	-0.954192	0.554266	-1.72154	0.0851526	0.998732
Peli1	336.196	0.188472	0.109481	1.72151	0.0851587	0.998732
Vdac2	947.616	0.171782	0.0998256	1.72082	0.0852829	0.998732
Mrpl1	83.8472	-0.255848	0.148691	-1.72067	0.0853107	0.998732
Prr14	74.2055	0.349725	0.203296	1.72027	0.0853832	0.998732
Etv5	69.6161	0.425123	0.24716	1.72003	0.0854269	0.998732
Ctnnd2	764.996	0.168379	0.0979381	1.71924	0.085571	0.998732
Rad51ap1	9.54217	0.783188	0.455556	1.71919	0.0855798	0.998732
Trp53cor1	8.98154	-0.764838	0.444992	-1.71877	0.0856566	0.998732
Sdf2	208.007	0.287002	0.166989	1.71869	0.0856705	0.998732
Cort	2.80032	1.58364	0.921533	1.71849	0.0857078	0.998732
Ssc5d	4.3797	1.13613	0.661141	1.71844	0.0857158	0.998732
Rffl	46.9209	0.410611	0.238952	1.71838	0.0857265	0.998732
RP24-363O16,2	6.83936	-0.876645	0.510176	-1.71832	0.0857384	0.998732
Fbxw4	90.6466	0.280233	0.16312	1.71795	0.0858053	0.998732
Chd2	690.382	-0.214421	0.124846	-1.71749	0.0858904	0.998732
1700030J22Rik	18.199	0.640829	0.3732	1.71712	0.0859571	0.998732
Flt3l	22.1548	-0.449119	0.261608	-1.71676	0.0860233	0.998732
BC064078	7.62998	-0.79106	0.460864	-1.71647	0.0860759	0.998732
Zfand3	186.268	0.294701	0.171724	1.71613	0.0861382	0.998732
Slc12a4	55.4534	0.407006	0.237186	1.71598	0.0861662	0.998732
Nrxn2	4212.67	0.172615	0.100594	1.71596	0.0861686	0.998732
Tssk6	1.65488	-1.74023	1.01442	-1.71549	0.0862556	0.998732
Gm4459	3.15425	1.29659	0.755818	1.71548	0.0862568	0.998732
Kctd13	239.721	0.234974	0.137003	1.7151	0.086326	0.998732
Gm3086	25.4826	0.514882	0.300206	1.71509	0.086328	0.998732
Rps12	34.4739	0.466704	0.272137	1.71496	0.0863523	0.998732
Lmcd1	9.24668	0.741146	0.432401	1.71402	0.0865242	0.998732
Ppp1r14a	103.765	-0.427337	0.249336	-1.7139	0.0865464	0.998732
Alg13	23.2943	-0.506426	0.295589	-1.71328	0.0866612	0.998732
A930004D18Rik	13.6751	0.587889	0.34324	1.71276	0.0867562	0.998732
Banf1	247.259	0.19466	0.113718	1.71177	0.0869387	0.998732
Larp1b	209.452	-0.184952	0.108061	-1.71155	0.0869795	0.998732
RP23-187M7,3	2.07895	-1.9896	1.16249	-1.7115	0.0869886	0.998732
E130012A19Rik	12.287	0.553578	0.323447	1.7115	0.0869896	0.998732
Zc3h12b	99.2309	-0.276338	0.161507	-1.711	0.0870817	0.998732
Sh3bp4	31.6384	0.396165	0.231571	1.71078	0.0871226	0.998732
Rev3l	520.013	-0.25974	0.151861	-1.71038	0.0871956	0.998732
1700017B05Rik	28.3675	0.485162	0.283669	1.71031	0.0872089	0.998732
Crcp	49.6431	-0.348734	0.20391	-1.71024	0.0872215	0.998732
Gfm1	118.594	0.267809	0.156693	1.70914	0.0874258	0.998732
9830147E19Rik	13.3622	-0.580988	0.340028	-1.70865	0.0875161	0.998732
Gsdma	1.46808	1.98797	1.16353	1.70856	0.0875324	0.998732
Wtip	28.2043	0.540789	0.316529	1.7085	0.0875443	0.998732
Slc19a2	39.7027	0.577344	0.337962	1.70831	0.0875788	0.998732
Stxbp2	110.44	-0.326486	0.19114	-1.7081	0.0876185	0.998732
Syt7	2455.81	0.178658	0.104598	1.70805	0.0876274	0.998732
A930011G23Rik	66.2779	-0.374401	0.21922	-1.70788	0.0876592	0.998732
Zfp292	1094.19	-0.185923	0.108872	-1.70772	0.0876885	0.998732
Akirin2	328.996	0.235975	0.138194	1.70757	0.0877165	0.998732
4930522L14Rik	6.44032	-0.838742	0.491242	-1.70739	0.0877496	0.998732
Tctn3	23.0603	0.428308	0.25087	1.70729	0.0877684	0.998732
Srebf1	72.2015	0.470006	0.275323	1.70711	0.0878022	0.998732
Tbx6	8.81979	0.807878	0.4733	1.7069	0.0878399	0.998732
Egr4	34.1454	0.62223	0.364553	1.70683	0.0878538	0.998732
Zbtb44	251.433	0.239096	0.140097	1.70664	0.0878888	0.998732
Rbm33	448.475	-0.237383	0.13913	-1.70619	0.0879724	0.998732
Pla2g2d	1.26616	2.6707	1.56574	1.70571	0.0880624	0.998732
Ash1l	2341.39	-0.187941	0.110204	-1.7054	0.0881202	0.998732
Rbbp4	607.042	0.147687	0.0866031	1.70534	0.0881316	0.998732
Klf10	22.1094	0.458896	0.269105	1.70527	0.0881442	0.998732
Gch1	12.1914	0.84947	0.498174	1.70517	0.0881632	0.998732
Api5	387.885	0.313803	0.184056	1.70494	0.0882065	0.998732
Lphn3	735.302	0.2263	0.132735	1.7049	0.088214	0.998732
Nipa2	76.0652	-0.252687	0.148235	-1.70464	0.0882624	0.998732
Snord89	307.468	-0.641293	0.376275	-1.70432	0.0883217	0.998732
Kif27	5.91837	1.14564	0.672213	1.70429	0.0883275	0.998732
Dcaf5	275.312	-0.134791	0.0790943	-1.70418	0.088347	0.998732
Aff2	36.089	-0.477339	0.280154	-1.70385	0.0884098	0.998732
Tmem109	356.69	0.220236	0.129269	1.7037	0.0884369	0.998732
Gcsh	100.823	-0.393855	0.231202	-1.70351	0.0884722	0.998732
Pja1	474.486	0.157599	0.0925337	1.70315	0.0885397	0.998732
Lrriq1	28.8177	-0.429845	0.252597	-1.7017	0.0888112	0.998732
Eif3a	1322.23	-0.16816	0.0988274	-1.70155	0.0888391	0.998732
Gm16008	2.49331	-1.1668	0.685847	-1.70125	0.0888965	0.998732
Ubxn2b	124.995	0.24952	0.146669	1.70125	0.0888969	0.998732
Celf6	74.6174	0.438519	0.257834	1.70078	0.0889842	0.998732
Lgr5	58.759	0.373752	0.219756	1.70076	0.0889885	0.998732
Dync1i2	2608.21	-0.132065	0.0776585	-1.70059	0.0890207	0.998732
Pax3	56.0201	0.322805	0.18982	1.70059	0.0890209	0.998732
Eef1a2	1709.14	0.149299	0.0877991	1.70046	0.0890441	0.998732
Cth	6.72387	0.89781	0.528152	1.69991	0.0891479	0.998732
N4bp2l2	467.648	-0.260883	0.153476	-1.69983	0.0891627	0.998732
Pigt	206.83	-0.304835	0.179367	-1.6995	0.0892244	0.998732
Tspyl1	859.733	0.268183	0.157817	1.69932	0.0892581	0.998732
Mtfr1l	328.514	0.199323	0.117303	1.69922	0.0892781	0.998732
Cpeb1	354.548	-0.203578	0.119817	-1.69907	0.0893058	0.998732
Aamdc	131.284	0.269978	0.158921	1.69882	0.0893538	0.998732
Ppp2r1a	1120.87	0.155543	0.0915857	1.69834	0.0894444	0.998732
Zfpm1	92.3476	0.282881	0.166568	1.69829	0.0894522	0.998732
Zfp142	90.9512	0.272528	0.160475	1.69826	0.0894585	0.998732
Tbcc	127.542	-0.272635	0.160571	-1.69791	0.0895242	0.998732
Btc	5.39768	-1.00294	0.590698	-1.69789	0.089528	0.998732
Gm12592	3.3256	-1.23214	0.725791	-1.69765	0.0895735	0.998732
Rapgef3	92.7549	0.425974	0.250921	1.69765	0.0895747	0.998732
Ythdf2	187.195	0.240466	0.141661	1.69748	0.089606	0.998732
Ap4b1	44.6367	-0.42285	0.249113	-1.69742	0.089617	0.998732
Mecr	46.4213	0.320325	0.188733	1.69724	0.0896512	0.998732
Nfx1	362.561	-0.159679	0.0940933	-1.69703	0.0896901	0.998732
1700056N10Rik	14.4849	-0.65645	0.386841	-1.69695	0.0897061	0.998732
0610040B10Rik	13.0403	-0.610161	0.359681	-1.69639	0.0898111	0.998732
Igsf8	593.707	0.179064	0.105556	1.69639	0.0898119	0.998732
Cr2	6.25642	1.17407	0.692345	1.69578	0.0899268	0.998732
Mccc2	46.4963	-0.314116	0.185264	-1.6955	0.0899805	0.998732
Pcyox1l	163.652	0.298172	0.175864	1.69547	0.0899863	0.998732
Angel2	291.369	0.164903	0.0972714	1.69529	0.09002	0.998732
Ndufaf6	51.2066	-0.334213	0.197148	-1.69524	0.0900292	0.998732
Amfr	301.558	0.169088	0.0997518	1.69509	0.0900586	0.998732
Luc7l2	1607.83	-0.21999	0.129784	-1.69505	0.0900666	0.998732
Gm10564	0.747967	-2.60168	1.53514	-1.69475	0.0901224	0.998732
Armcx5	132.088	-0.254012	0.149888	-1.69467	0.0901377	0.998732
Rpl34-ps1	189.084	0.237861	0.140395	1.69422	0.090223	0.998732
Vapa	669.311	0.22219	0.131172	1.69389	0.0902858	0.998732
Prph	30.2409	-0.952486	0.562468	-1.69341	0.0903782	0.998732
Aim1	4.03027	1.10885	0.655044	1.69279	0.0904956	0.998732
Ndufaf3	126.501	0.232842	0.137595	1.69222	0.0906032	0.998732
Kif13b	44.0197	-0.446978	0.264148	-1.69215	0.0906169	0.998732
Calb2	1368.16	0.260649	0.154069	1.69177	0.0906899	0.998732
Gm8648	4.52203	1.15762	0.684544	1.69108	0.0908212	0.998732
Sesn1	190.77	0.326345	0.192991	1.69098	0.0908398	0.998732
Galc	61.2623	0.343576	0.203193	1.69089	0.0908584	0.998732
Rdx	1120.5	-0.158837	0.093943	-1.69078	0.0908781	0.998732
Zmiz2	296.769	0.169532	0.10027	1.69076	0.0908822	0.998732
Nrtn	15.6335	0.618129	0.365616	1.69065	0.0909031	0.998732
Il17rc	7.93542	0.936732	0.554169	1.69034	0.0909633	0.998732
Pantr1	92.9613	0.315328	0.186571	1.69012	0.0910051	0.998732
Kdelr2	112.262	0.298789	0.17679	1.69008	0.0910126	0.998732
Tomm22	193.237	0.266844	0.157923	1.68971	0.0910838	0.998732
Inha	58.2987	0.345685	0.204665	1.68903	0.0912137	0.998732
Fam126a	68.4863	-0.274359	0.162453	-1.68885	0.0912484	0.998732
Tal2	1.06937	2.39821	1.42016	1.6887	0.0912773	0.998732
Ndel1	447.166	0.204916	0.121358	1.68853	0.0913104	0.998732
Cuedc1	193.6	-0.181531	0.107541	-1.68802	0.0914066	0.998732
8430408G22Rik	41.0089	0.865582	0.512993	1.68732	0.0915426	0.998732
Nek1	328.947	-0.241179	0.142937	-1.68731	0.0915437	0.998732
Tm7sf2	21.0584	-0.486666	0.288511	-1.68682	0.0916383	0.998732
Aagab	237.31	0.2291	0.135851	1.68641	0.0917171	0.998732
Six4	31.2538	0.391448	0.232148	1.6862	0.0917571	0.998732
B230219D22Rik	1018.26	-0.178781	0.106038	-1.686	0.0917961	0.998732
Gm16485	30.6806	-0.575217	0.341242	-1.68566	0.091862	0.998732
Tmem132a	379.292	0.225952	0.134045	1.68564	0.0918642	0.998732
Pcyt1b	143.003	-0.31794	0.188617	-1.68563	0.0918662	0.998732
Naa38	332.042	0.220146	0.130607	1.68557	0.0918795	0.998732
Dqx1	6.40429	0.817316	0.484938	1.6854	0.091911	0.998732
Astn1	221.044	0.305528	0.181291	1.68528	0.0919336	0.998732
D130051D11Rik	2.61723	1.59035	0.943843	1.68498	0.0919932	0.998732
Nupl2	17.8519	-0.552874	0.328249	-1.68431	0.0921215	0.998732
Sox14	3.67439	1.59989	0.950678	1.68289	0.0923957	0.998732
RP24-204F16,4	14.7678	0.660891	0.392759	1.68269	0.0924353	0.998732
Pole	5.40933	-0.980787	0.583051	-1.68216	0.0925372	0.998732
RP23-394E10,1	1.96062	-1.86576	1.10922	-1.68205	0.0925596	0.998732
Pbx3	405.554	0.206913	0.123041	1.68166	0.0926339	0.998732
Slk	793.888	-0.220414	0.131079	-1.68154	0.0926579	0.998732
Palm3	8.54977	-0.836962	0.497755	-1.68148	0.0926706	0.998732
Map3k3	147.562	0.251155	0.149374	1.68139	0.0926876	0.998732
Amhr2	10.1219	0.735059	0.437207	1.68126	0.0927124	0.998732
Nudt11	129.565	0.286747	0.170581	1.681	0.0927622	0.998732
Mthfd2	95.6576	0.324882	0.1933	1.68071	0.0928191	0.998732
Dnah8	14.8117	0.705709	0.419988	1.6803	0.092898	0.998732
Gtf3a	58.8723	-0.363045	0.216072	-1.6802	0.0929177	0.998732
Exoc1	154.377	-0.196434	0.116914	-1.68016	0.0929268	0.998732
Zfp831	5.09804	1.1373	0.676985	1.67995	0.0929676	0.998732
D15Ertd621e	185.572	0.211335	0.125806	1.67985	0.0929865	0.998732
Cpsf4l	5.9788	1.27007	0.756168	1.67961	0.0930323	0.998732
Anks3	114.857	0.293529	0.174843	1.67882	0.0931879	0.998732
Gm8355	4.72073	1.07105	0.638308	1.67795	0.0933578	0.998732
Gm23722	7.12077	0.93357	0.556548	1.67743	0.0934586	0.998732
RP23-330G24,3	51.7353	0.277949	0.165704	1.67739	0.0934662	0.998732
Sp6	3.25012	1.39657	0.832683	1.6772	0.0935039	0.998732
Pcsk6	360.738	0.298496	0.177975	1.67718	0.0935072	0.998732
RP23-25J21,1	6.49309	-0.949967	0.566468	-1.677	0.0935426	0.998732
RP23-335C3,8	1.51805	-1.68847	1.0073	-1.67623	0.093693	0.998732
A830039N20Rik	397.676	0.26502	0.158105	1.67622	0.0936944	0.998732
Inpp5e	147.002	0.332446	0.198379	1.67581	0.0937749	0.998732
Kcnq1ot1	3044.54	-0.207609	0.123885	-1.67581	0.0937752	0.998732
Slfn3	0.973913	-2.32178	1.3855	-1.67577	0.0937833	0.998732
Mylk	139.243	0.290904	0.173595	1.67576	0.0937846	0.998732
Zbtb26	27.4073	-0.510981	0.305011	-1.67529	0.0938783	0.998732
mt-Nd2	69034.7	-0.314405	0.18768	-1.67522	0.0938906	0.998732
Ccz1	180.409	-0.26215	0.156492	-1.67517	0.0939017	0.998732
Sema3g	18.3008	0.484365	0.289206	1.67481	0.0939711	0.998732
Thoc2	1201.13	-0.189962	0.11344	-1.67456	0.0940198	0.998732
Cgn	59.9058	0.396536	0.23685	1.67421	0.0940895	0.998732
Hps4	106.976	0.297263	0.177557	1.67418	0.0940948	0.998732
Cacna1g	318.45	0.221453	0.132276	1.67416	0.0940983	0.998732
Ndufaf2	132.912	-0.230107	0.137447	-1.67415	0.0941006	0.998732
Slc25a44	400.69	0.159229	0.0951199	1.67398	0.0941336	0.998732
Cmtm4	144.694	0.314183	0.187766	1.67327	0.0942735	0.998732
Ndst3	426.974	-0.337654	0.201826	-1.67299	0.0943288	0.998732
Heatr6	182.93	-0.19484	0.116477	-1.67278	0.0943708	0.998732
Nrip3	820.474	-0.174584	0.104378	-1.67261	0.0944032	0.998732
Mir22hg	78.4353	-0.350235	0.209405	-1.67253	0.0944205	0.998732
Plce1	307.933	-0.175869	0.105154	-1.67249	0.0944285	0.998732
Gm16589	13.1302	-0.583277	0.348783	-1.67232	0.094461	0.998732
Gm5621	1.98769	-1.83594	1.09818	-1.6718	0.0945643	0.998732
Rexo1	181.631	-0.221462	0.132478	-1.67169	0.0945857	0.998732
Ppapdc2	205.895	0.318886	0.19077	1.67157	0.0946091	0.998732
Gm9396	7.33968	0.855137	0.51163	1.6714	0.094643	0.998732
Hmces	92.6073	0.291484	0.174397	1.67138	0.094646	0.998732
Spata1	6.50768	-0.805078	0.481717	-1.67127	0.0946689	0.998732
Flcn	181.718	0.306078	0.183208	1.67066	0.0947896	0.998732
Nom1	166.844	-0.232041	0.138894	-1.67063	0.0947953	0.998732
Zfp711	78.5194	-0.35444	0.212183	-1.67044	0.0948314	0.998732
Hoxb7	1.68568	-1.9854	1.18887	-1.66998	0.0949225	0.998732
Ryk	482.446	0.209415	0.125406	1.6699	0.0949393	0.998732
Cd93	44.0711	0.38279	0.229261	1.66967	0.094985	0.998732
H2-DMb1	4.76785	-1.04913	0.628378	-1.66958	0.0950025	0.998732
Wee2	1.67447	2.1768	1.30384	1.66953	0.0950122	0.998732
C1galt1c1	41.7244	0.362346	0.217071	1.66925	0.0950674	0.998732
Sumf2	42.0125	-0.50037	0.299966	-1.66809	0.0952979	0.998732
Mlf2	663.094	0.167821	0.10061	1.66804	0.0953081	0.998732
Inpp5b	161.893	0.228921	0.137249	1.66793	0.0953295	0.998732
Firre	120.083	0.242902	0.145637	1.66786	0.0953443	0.998732
Ccdc85b	3.28236	1.38925	0.833177	1.66742	0.0954316	0.998732
Acy1	29.4999	-0.422811	0.253624	-1.66708	0.0954991	0.998732
4930506M07Rik	142.572	-0.235839	0.14151	-1.66658	0.0955972	0.998732
Atp5f1	834.138	0.171474	0.102911	1.66624	0.0956659	0.998732
Csad	193.412	0.282934	0.169811	1.66618	0.0956785	0.998732
Zfp691	9.32093	-0.750556	0.450509	-1.66602	0.0957101	0.998732
Cox20-ps	45.9203	-0.316635	0.190098	-1.66564	0.0957852	0.998732
Gldc	19.2846	0.543691	0.326488	1.66527	0.0958583	0.998732
Slc3a2	515.165	0.170631	0.102474	1.66511	0.0958916	0.998732
Zfp763	69.3273	-0.342367	0.205631	-1.66496	0.095921	0.998732
Tgfa	35.266	-0.417785	0.250937	-1.6649	0.0959331	0.998732
Tjp2	224.056	0.28053	0.168502	1.66484	0.095944	0.998732
Kcnn2	116.373	-0.250816	0.150671	-1.66466	0.0959805	0.998732
Gpx2-ps1	0.984838	3.02859	1.81987	1.66418	0.0960765	0.998732
Rab11fip2	270.116	-0.246759	0.148278	-1.66416	0.0960804	0.998732
Gm336	5.21003	-0.832294	0.500283	-1.66365	0.0961831	0.998732
Ak4	255.051	0.347347	0.208821	1.66338	0.096237	0.998732
Slc35f1	231.449	-0.34656	0.208348	-1.66337	0.0962382	0.998732
Zfp934	1.24396	2.57629	1.549	1.6632	0.0962723	0.998732
Kcnab3os	1.34786	-2.14843	1.29184	-1.66308	0.096297	0.998732
Cdc7	92.4883	0.301985	0.181583	1.66307	0.096299	0.998732
Gm11542	2.18601	-1.80571	1.08584	-1.66297	0.0963194	0.998732
Dhfr	66.8875	-0.296027	0.178013	-1.66296	0.0963212	0.998732
Pddc1	27.0944	-0.459101	0.276162	-1.66244	0.0964252	0.998732
Hist1h1e	72.6432	-0.508389	0.305825	-1.66235	0.0964417	0.998732
RP23-377H12,5	32.2348	-0.578408	0.348073	-1.66174	0.0965642	0.998732
Sf3b6	377.334	0.225515	0.135716	1.66166	0.0965802	0.998732
Inpp5j	289.916	0.250862	0.151018	1.66114	0.0966856	0.998732
Dph7	14.759	-0.577419	0.347612	-1.6611	0.0966926	0.998732
Senp1	117.861	0.312485	0.188184	1.66053	0.0968075	0.998732
Gm15912	6.33429	-0.894228	0.538569	-1.66038	0.0968383	0.998732
Zbtb6	66.1033	-0.334536	0.201518	-1.66008	0.0968981	0.998732
Gm11578	2.09793	1.41597	0.852967	1.66005	0.0969039	0.998732
Mfhas1	480.206	-0.250307	0.150791	-1.65997	0.0969214	0.998732
Hapln1	29.4276	-0.453835	0.273463	-1.65958	0.0969985	0.998732
Gm7964	34.2782	-0.567219	0.341803	-1.65949	0.0970171	0.998732
Afg3l2	169.774	0.224454	0.135367	1.65812	0.097294	0.998732
Gm15432	7.53038	1.12944	0.681265	1.65785	0.0973468	0.998732
Pfdn4	150.734	-0.253781	0.153084	-1.65779	0.0973604	0.998732
Hadha	336.884	-0.211556	0.127629	-1.65759	0.0974009	0.998732
1700086L19Rik	5.55069	-1.14208	0.68904	-1.65749	0.0974209	0.998732
Psmc6	409.385	-0.149503	0.0902188	-1.65712	0.0974951	0.998732
Irgm1	7.84329	0.90625	0.547007	1.65674	0.0975718	0.998732
Lhx9	65.412	0.782098	0.472078	1.65671	0.0975775	0.998732
Slc6a13	72.1327	0.387197	0.233717	1.65669	0.0975818	0.998732
Clec4a2	2.57445	-1.45062	0.875849	-1.65624	0.0976733	0.998732
RP24-393L8,1	1.41794	2.77976	1.67837	1.65622	0.0976765	0.998732
Lrrc73	113.932	0.257599	0.155576	1.65578	0.0977669	0.998732
Gm15815	2.941	-1.15397	0.696977	-1.65568	0.0977875	0.998732
Cpn1	1.2648	-1.8702	1.12959	-1.65565	0.0977931	0.998732
P4ha1	129.241	0.274321	0.165694	1.65559	0.0978052	0.998732
Gm7436	14.5229	0.60782	0.367228	1.65515	0.0978932	0.998732
Nsa2	92.6561	-0.224126	0.135423	-1.65501	0.0979227	0.998732
Igfbp5	452.092	0.250117	0.151138	1.6549	0.0979457	0.998732
Aox1	35.7855	-0.412958	0.249592	-1.65453	0.0980197	0.998732
Mcm10	3.54061	0.981211	0.593061	1.65449	0.0980289	0.998732
Slc33a1	76.0753	0.378113	0.228608	1.65398	0.0981316	0.998732
Ankub1	20.0421	-0.526839	0.318605	-1.65358	0.0982135	0.998732
Ikbkap	183.901	-0.253444	0.153284	-1.65342	0.0982453	0.998732
Gm16106	0.879671	2.85832	1.72957	1.65262	0.0984088	0.998732
Prelid2	5.16433	-0.884743	0.535388	-1.65253	0.0984273	0.998732
Arhgap29	121.84	-0.239564	0.144984	-1.65235	0.0984635	0.998732
Klhl2	142.284	0.205143	0.124167	1.65216	0.0985012	0.998732
Ccdc82	445.404	-0.26522	0.160529	-1.65215	0.098503	0.998732
Tecrl	1.38197	-2.39538	1.45008	-1.65189	0.098556	0.998732
Nop56	127.034	-0.401988	0.243414	-1.65145	0.0986461	0.998732
Rab1b	155.157	0.226498	0.137152	1.65144	0.0986492	0.998732
Gltscr2	325.609	-0.197168	0.119405	-1.65125	0.098687	0.998732
Thada	71.127	-0.281092	0.170249	-1.65106	0.0987257	0.998732
Rbm12b2	35.9318	0.443517	0.26864	1.65097	0.0987445	0.998732
Chek1	4.85111	1.0302	0.624289	1.65019	0.0989041	0.998732
Ankdd1b	1.38566	-2.00706	1.21627	-1.65019	0.098905	0.998732
Atp6v0e	289.345	0.204894	0.124167	1.65015	0.0989113	0.998732
Sh3bp5	666.903	0.163924	0.0993504	1.64995	0.0989525	0.998732
Smc6	925.147	-0.184019	0.111532	-1.64991	0.0989606	0.998732
Syt2	2025.51	-0.169536	0.102778	-1.64954	0.0990373	0.998732
2810474O19Rik	358.511	-0.221005	0.133999	-1.6493	0.0990864	0.998732
2810004N23Rik	184.215	-0.228361	0.138465	-1.64924	0.0990993	0.998732
Bloc1s4	90.9686	0.284092	0.17226	1.6492	0.0991061	0.998732
Ralgps2	444.639	-0.198353	0.120287	-1.64899	0.099149	0.998732
Gm28153	0.86122	2.8485	1.72784	1.64859	0.0992325	0.998732
Pcdhga4	1.07837	-2.61306	1.58507	-1.64854	0.0992409	0.998732
RP24-566B6,2	32.9055	-0.474225	0.287697	-1.64835	0.0992809	0.998732
Ppp6c	175.153	0.212069	0.128669	1.64817	0.0993177	0.998732
Tmx1	540.308	0.170512	0.103459	1.64812	0.0993276	0.998732
Srf	215.421	0.345804	0.209841	1.64793	0.0993665	0.998732
Ofd1	72.0993	-0.291473	0.176884	-1.64782	0.099389	0.998732
Zcchc7	1114.88	-0.152393	0.0924884	-1.6477	0.0994147	0.998732
Zfp422	44.8525	0.471581	0.286216	1.64764	0.0994257	0.998732
Mlc1	664.066	0.192461	0.116818	1.64753	0.0994498	0.998732
Smc1a	1432.81	-0.161714	0.0981563	-1.64752	0.0994514	0.998732
Ly75	9.14698	-0.566618	0.343932	-1.64747	0.0994612	0.998732
Anp32b	230.649	-0.194455	0.118036	-1.64742	0.0994713	0.998732
[truncated: 22,226 more rows]

## Sheet: WT_T_vs_TS_T
Gene	baseMean	log2FoldChange	lfcSE	stat	pvalue	padj
Ets2	277.118	0.846288	0.153418	5.51623	3.46e-08	7.56e-05
Son	3405.75	0.531731	0.104014	5.11213	3.19e-07	0.000347699
Dyrk1a	432.158	0.472147	0.0947084	4.98527	6.19e-07	0.000388715
Itsn1	739.381	0.642162	0.130668	4.91445	8.9e-07	0.000388715
Ttc3	8137.45	0.458662	0.0928061	4.94216	7.73e-07	0.000388715
Brwd1	458.759	0.443937	0.0976047	4.54832	5.41e-06	0.0019675
Tulp4	1449.01	0.866342	0.229751	3.77079	0.000162731	0.0507487
Gtf2i	393.654	-0.360443	0.0979433	-3.68011	0.000233131	0.0636155
Akap8l	349.887	0.655957	0.18094	3.62527	0.000288661	0.0659954
mt-Tl1	266.193	0.678922	0.187895	3.61331	0.000302315	0.0659954
Arid1b	384.185	0.400054	0.113561	3.52281	0.000427002	0.0788748
Marf1	467.467	0.913541	0.25962	3.51876	0.000433577	0.0788748
Cdyl	303.577	0.66745	0.191126	3.49219	0.000479074	0.0804476
Dpp6	1212.37	0.594367	0.175582	3.38512	0.000711465	0.0913605
Eif4g2	926.416	-0.280773	0.0823874	-3.40796	0.000654509	0.0913605
Jund	253.864	0.748677	0.220667	3.39279	0.000691859	0.0913605
Synj1	1317.23	0.430433	0.12649	3.40289	0.000666764	0.0913605
Psmc1	1136.08	0.535021	0.159158	3.36156	0.000775025	0.0939933
Cox8a	972.854	-0.508989	0.154707	-3.29002	0.0010018	0.0994058
Dnm1	556.534	0.454957	0.137462	3.30968	0.000934032	0.0994058
Pptc7	914.5	-0.356134	0.108153	-3.29287	0.000991717	0.0994058
Usp16	264.272	0.425844	0.129308	3.29325	0.00099036	0.0994058
Arpc2	652.006	0.275623	0.084929	3.24533	0.00117314	0.104079
Ehd3	418.311	0.362507	0.111857	3.24081	0.00119193	0.104079
Mapk10	1042.15	0.597322	0.183316	3.25842	0.00112034	0.104079
Psap	2756.38	-0.459587	0.142609	-3.2227	0.00126988	0.106621
Gtf2h5	339.495	0.371959	0.116373	3.19627	0.00139218	0.112561
Snrpd3	470.469	0.554698	0.174512	3.17856	0.00148007	0.115393
2210016L21Rik	332.132	0.421592	0.137966	3.05576	0.00224494	0.148506
Ap1b1	346.222	0.328887	0.106843	3.07822	0.0020824	0.148506
Chd4	885.421	0.350008	0.114538	3.05583	0.00224437	0.148506
2006-09-01	274.642	0.305164	0.0990393	3.08124	0.0020614	0.148506
Strbp	1982.12	0.303878	0.0988555	3.07396	0.00211235	0.148506
Akr1a1	445.696	-0.364229	0.12078	-3.01565	0.00256428	0.164642
Eif1	834.21	-0.294685	0.0981127	-3.00354	0.00266862	0.166446
Ctnnb1	1093.21	-0.321047	0.107766	-2.9791	0.00289094	0.170565
Stub1	537.151	0.809227	0.271435	2.98129	0.00287038	0.170565
Dstn	630.893	0.429039	0.145374	2.95127	0.00316468	0.181802
Ctr9	356.729	0.413739	0.141044	2.93341	0.00335264	0.187662
Atp5c1	394.096	-0.288613	0.0989763	-2.91598	0.00354577	0.19351
1110001J03Rik	336.064	-0.422672	0.146155	-2.89195	0.00382856	0.194366
Gap43	1024.17	0.42677	0.147412	2.89508	0.00379065	0.194366
Socs7	626.719	-0.478035	0.164751	-2.90157	0.00371296	0.194366
Sars	446.589	0.307609	0.10679	2.88052	0.00397023	0.196978
Celsr2	259.861	0.356713	0.124563	2.86372	0.00418704	0.198075
Nefh	1011.79	0.390458	0.136038	2.8702	0.00410207	0.198075
Paxbp1	420.929	0.460124	0.161011	2.85772	0.0042669	0.198075
Ppp2r5b	264.357	0.55863	0.195927	2.85121	0.00435529	0.198075
Cryab	478.601	-0.492026	0.174529	-2.81916	0.00481496	0.202136
Fgf1	315.374	0.307167	0.108693	2.826	0.00471327	0.202136
Pcbp1	317.055	-0.342607	0.120923	-2.83327	0.00460739	0.202136
Scg5	938.632	-0.566756	0.200638	-2.82477	0.0047314	0.202136
Elovl5	346.14	-0.506661	0.180479	-2.80732	0.00499561	0.203086
Erc2	279.436	0.384484	0.137046	2.80551	0.00502365	0.203086
Atp1b2	1247.75	-0.406381	0.149855	-2.71182	0.00669141	0.206051
Braf	539.953	0.305915	0.111343	2.74751	0.00600498	0.206051
Bri3bp	313.076	0.26069	0.0944047	2.76141	0.0057552	0.206051
Cct8	569.306	0.266451	0.0976422	2.72885	0.00635564	0.206051
Cox6b1	809.868	-0.383565	0.140045	-2.73886	0.00616524	0.206051
Klc2	338.402	0.487569	0.176056	2.7694	0.00561603	0.206051
Mef2d	406.03	-0.345738	0.126981	-2.72274	0.00647421	0.206051
Nsg1	1604.19	-0.300182	0.111279	-2.69757	0.00698477	0.206051
Picalm	438.147	-0.40503	0.150091	-2.69856	0.00696397	0.206051
Prkacb	989.562	0.368278	0.135455	2.71881	0.00655167	0.206051
Rapgef6	318.914	0.366889	0.132592	2.76705	0.00565652	0.206051
Rph3a	700.54	0.310035	0.111277	2.78615	0.00533389	0.206051
Rpl13a	550.55	-0.453612	0.167687	-2.70512	0.00682803	0.206051
Sez6l2	835.829	0.305185	0.109899	2.77695	0.00548712	0.206051
Sfxn5	629.717	-0.340258	0.123413	-2.75707	0.00583226	0.206051
Shoc2	266.382	0.459035	0.166245	2.7612	0.00575899	0.206051
Smg7	496.642	0.495846	0.181077	2.73831	0.00617557	0.206051
Tmcc1	396.351	-0.257105	0.0948081	-2.71185	0.0066909	0.206051
Trim37	1267.09	0.296383	0.109006	2.71897	0.0065486	0.206051
Trim9	375.095	-0.33724	0.124383	-2.71129	0.0067021	0.206051
Clcn4-2	434.205	-0.263134	0.0985946	-2.66884	0.0076113	0.207106
Gigyf2	341.753	0.335934	0.125577	2.67513	0.00747013	0.207106
Iqsec1	682.594	0.33054	0.123063	2.68595	0.0072325	0.207106
Max	329.35	-0.444915	0.167166	-2.66152	0.00777891	0.207106
Nrxn2	2516.62	-0.233	0.0869526	-2.67962	0.00737055	0.207106
Ppp6r3	296.057	-0.358188	0.134181	-2.66943	0.00759797	0.207106
Snap91	452.711	-0.382501	0.142876	-2.67715	0.00742517	0.207106
Zfp106	828.899	0.299612	0.112573	2.66149	0.00777951	0.207106
Zfp871	283.238	0.575208	0.216684	2.65459	0.00794045	0.208843
Atp5g3	2282.12	-0.41899	0.158623	-2.64141	0.00825607	0.21456
Tsc22d3	269.869	-0.338924	0.128523	-2.63708	0.00836242	0.214767
Mrfap1	748.457	-0.319504	0.121496	-2.62975	0.00854466	0.215796
Slc25a3	1194.14	-0.283895	0.108045	-2.62755	0.0086002	0.215796
Oxr1	555.579	0.303945	0.11608	2.6184	0.0088344	0.216691
Slc9a6	288.285	-0.442415	0.168934	-2.61887	0.00882214	0.216691
Mlc1	382.965	-0.298253	0.114081	-2.61439	0.00893869	0.216813
Scamp1	618.394	-0.400022	0.154703	-2.58574	0.00971715	0.233105
Rps3	473.446	-0.362443	0.140603	-2.57777	0.00994388	0.235951
Sel1l	530.897	-0.223474	0.0871807	-2.56334	0.0103669	0.243345
Ube2r2	427.12	-0.233261	0.0913017	-2.55484	0.0106238	0.24672
Penk	267.594	-0.436339	0.171653	-2.54198	0.0110226	0.25065
Uqcrq	615.589	-0.280094	0.110076	-2.54455	0.0109419	0.25065
Psma2	467.876	-0.371006	0.146473	-2.53292	0.0113116	0.254569
Aig1	360.546	-0.264857	0.105258	-2.51626	0.0118608	0.263773
Dazap1	271.637	-0.33548	0.133484	-2.51326	0.0119622	0.263773
Ppp1ca	317.33	-0.254559	0.101624	-2.5049	0.0122488	0.264743
mt-Tm	809.137	0.628785	0.250942	2.5057	0.012221	0.264743
Ncdn	1084.59	0.644572	0.258382	2.49465	0.0126081	0.269838
Cox7a2	1139.91	-0.257342	0.104725	-2.4573	0.0139985	0.27065
Creb1	338.806	-0.241161	0.0990255	-2.43534	0.0148777	0.27065
Crebrf	1236.11	0.314826	0.127154	2.47595	0.0132882	0.27065
D430041D05Rik	341.174	0.381059	0.156451	2.43565	0.014865	0.27065
Dazap2	284.459	-0.279624	0.114729	-2.43726	0.0147992	0.27065
Eif4h	437.264	-0.290937	0.119247	-2.43979	0.014696	0.27065
Gpm6b	1844.7	-0.331762	0.135052	-2.45655	0.0140277	0.27065
Gstm1	438.85	-0.261938	0.10728	-2.44163	0.014621	0.27065
Laptm4a	1158.55	-0.337318	0.136197	-2.4767	0.0132605	0.27065
Ndufa8	367.227	-0.340865	0.138149	-2.46737	0.0136111	0.27065
Pim3	307.566	-0.331907	0.134694	-2.46415	0.0137337	0.27065
Pla2g16	257.105	-0.302952	0.123718	-2.44873	0.0143363	0.27065
Psmb4	521.409	-0.315254	0.127672	-2.46924	0.0135401	0.27065
Rps17	282.136	-0.355846	0.145771	-2.44112	0.0146416	0.27065
Slc32a1	494.323	-0.47066	0.192464	-2.44545	0.0144673	0.27065
Sugt1	265.171	0.192684	0.0786845	2.44881	0.0143329	0.27065
Tmx1	315.235	-0.25516	0.104333	-2.44563	0.01446	0.27065
mt-Rnr1	68801.7	0.431916	0.177215	2.43725	0.0147996	0.27065
Arf5	440.938	0.538475	0.222149	2.42393	0.0153535	0.276997
Atp5b	1891.66	-0.231635	0.0988654	-2.34293	0.019133	0.287356
Cadm3	939.063	0.455372	0.194314	2.34349	0.0191045	0.287356
Cald1	284.69	0.295008	0.124659	2.36651	0.0179565	0.287356
Cetn3	992.4	0.302512	0.126306	2.39507	0.0166172	0.287356
Ddx17	800.41	-0.257705	0.108792	-2.36878	0.0178466	0.287356
Dnajb14	742.007	0.209209	0.0890458	2.34945	0.0188011	0.287356
Eif3k	256.063	-0.346547	0.14656	-2.36453	0.0180529	0.287356
Ergic2	308.164	-0.184097	0.0767852	-2.39757	0.0165044	0.287356
Ghitm	831.915	-0.437064	0.187112	-2.33584	0.0194995	0.287356
Hint1	1123.16	-0.330392	0.140799	-2.34655	0.0189483	0.287356
Huwe1	808.669	0.248257	0.106609	2.32867	0.0198767	0.287356
Kcnab3	310.736	-0.473467	0.20176	-2.34669	0.0189412	0.287356
Kcnc1	1819.26	0.375623	0.160571	2.3393	0.0193202	0.287356
Kcnc3	1309.86	0.413459	0.174852	2.36463	0.0180481	0.287356
N4bp1	303.167	0.280339	0.116802	2.40012	0.0163897	0.287356
Pdia6	253.867	-0.429232	0.179611	-2.38978	0.0168584	0.287356
Pi4ka	411.282	-0.199656	0.0850521	-2.34745	0.0189024	0.287356
Rac1	650.654	-0.248268	0.105244	-2.35898	0.0183254	0.287356
Ralgds	300.855	-0.307932	0.128802	-2.39074	0.0168143	0.287356
Rpl37a	671.707	-0.28471	0.121042	-2.35216	0.0186648	0.287356
Sacs	361.071	0.268214	0.11508	2.33067	0.019771	0.287356
Saraf	495.882	-0.326013	0.139769	-2.3325	0.0196742	0.287356
Tex261	298.297	-0.26697	0.111005	-2.40504	0.0161707	0.287356
Thrap3	265.03	0.313547	0.133435	2.34981	0.018783	0.287356
Trpc4ap	264.356	-0.220972	0.0941274	-2.34759	0.0188954	0.287356
Ube2d3	408.401	-0.338158	0.141754	-2.38553	0.0170545	0.287356
Wbp2	631.933	-0.382522	0.159104	-2.40423	0.0162067	0.287356
Zeb1	408.97	0.260912	0.110336	2.3647	0.0180447	0.287356
Zmynd11	736.827	-0.23967	0.100814	-2.37734	0.0174379	0.287356
mt-Nd5	8636.99	0.317299	0.13611	2.33119	0.0197434	0.287356
App	3213.38	0.41578	0.179678	2.31403	0.0206661	0.287828
Brk1	282.982	-0.246404	0.106514	-2.31334	0.0207037	0.287828
Ndufa6	600.795	-0.349261	0.150766	-2.31658	0.0205269	0.287828
Nos1	275.81	-0.3035	0.130953	-2.31763	0.0204697	0.287828
Ryk	272.938	-0.36599	0.158123	-2.31459	0.0206354	0.287828
Sod1	1681.88	0.434144	0.187273	2.31824	0.0204365	0.287828
Supt6	338.967	0.357101	0.154521	2.31101	0.0208322	0.287828
Wdr26	597.986	0.301994	0.131167	2.30236	0.0213149	0.292644
Atp5a1	1771.67	-0.218173	0.094943	-2.29793	0.0215655	0.293535
Csnk1d	269.372	-0.305304	0.132945	-2.29648	0.0216487	0.293535
A330023F24Rik	429.358	-0.318734	0.141457	-2.25322	0.0242456	0.299529
Akap12	388.211	0.211915	0.094812	2.23511	0.0254102	0.299529
Armc1	427.919	-0.250712	0.110888	-2.26095	0.0237626	0.299529
Atp5o	964.177	0.258448	0.114721	2.25284	0.0242693	0.299529
Cds2	473.715	-0.353639	0.154987	-2.28173	0.0225052	0.299529
Clip3	1862.63	0.419513	0.183804	2.28239	0.0224663	0.299529
Cnot6	291.892	-0.294182	0.131521	-2.23676	0.0253018	0.299529
Ctnnd2	454.275	-0.232908	0.104729	-2.2239	0.0261549	0.299529
Dennd5a	317.491	-0.218544	0.0970662	-2.2515	0.0243541	0.299529
Dexi	269.366	-0.40837	0.183279	-2.22813	0.0258716	0.299529
Emc6	314.976	-0.226945	0.101625	-2.23316	0.0255383	0.299529
Fam120a	442.201	-0.269163	0.118901	-2.26375	0.0235897	0.299529
Fam193b	261.855	-0.220715	0.098869	-2.23239	0.0255889	0.299529
Ip6k1	416.806	-0.255847	0.114336	-2.23767	0.0252426	0.299529
Mtmr4	405.12	-0.327506	0.146305	-2.23851	0.025188	0.299529
Myo6	668.276	0.211612	0.0952498	2.22165	0.0263068	0.299529
Naca	283.122	-0.471426	0.210465	-2.23992	0.025096	0.299529
Nfkbia	375.911	-0.354148	0.156034	-2.26968	0.0232267	0.299529
Nsun2	254.157	0.52812	0.233646	2.26034	0.0238002	0.299529
Nudt4	325.282	0.25075	0.111817	2.24251	0.0249283	0.299529
Opcml	350.769	0.26429	0.115954	2.27928	0.0226507	0.299529
Ppp3cb	421.657	-0.170693	0.0766475	-2.22699	0.0259479	0.299529
Rplp2	719.37	-0.295669	0.133118	-2.2211	0.0263443	0.299529
Sepw1	282.152	0.435239	0.19556	2.22561	0.0260405	0.299529
Slc1a3	2321.53	-0.336929	0.150343	-2.24107	0.0250217	0.299529
Slc5a3	316.106	0.32716	0.14441	2.26548	0.023483	0.299529
Smarca2	1474.15	0.223982	0.098577	2.27216	0.0230771	0.299529
Stx1b	278.915	0.227873	0.100225	2.27361	0.0229897	0.299529
Tbc1d9b	461.678	0.320027	0.142511	2.24563	0.0247278	0.299529
Tubb3	556.418	0.622003	0.277206	2.24383	0.0248431	0.299529
Uqcrc2	701.178	-0.195835	0.0856864	-2.28548	0.0222847	0.299529
Dnm3	886.837	0.274717	0.123877	2.21766	0.0265779	0.300012
Madd	310.821	-0.314166	0.141744	-2.21644	0.0266616	0.300012
Adam23	379.632	0.191457	0.0880342	2.1748	0.0296452	0.30086
Ahi1	1406.78	0.34374	0.157992	2.17568	0.0295795	0.30086
Ankrd11	1287.38	0.195685	0.0903698	2.16538	0.0303585	0.30086
Anp32e	392.423	-0.242872	0.112337	-2.16199	0.0306186	0.30086
Ap2a2	310.005	0.267566	0.123016	2.17505	0.029626	0.30086
Camk2g	314.414	0.267888	0.122277	2.19083	0.0284639	0.30086
Cd81	1038.69	-0.255404	0.116454	-2.19316	0.0282956	0.30086
Coro1c	295.74	-0.362241	0.167753	-2.15937	0.0308215	0.30086
Dnaja1	386.84	-0.334248	0.152538	-2.19124	0.0284345	0.30086
Gabarapl2	501.347	-0.246952	0.113225	-2.18108	0.0291775	0.30086
Glrx5	287.272	-0.340158	0.157868	-2.1547	0.031185	0.30086
Gm22710	776.362	0.743112	0.344925	2.15442	0.0312074	0.30086
Hnrnpa2b1	586.058	-0.270412	0.123934	-2.1819	0.0291166	0.30086
Hspa4	608.783	-0.251702	0.116218	-2.16577	0.0303287	0.30086
Ift20	538.886	-0.335763	0.1526	-2.20029	0.0277867	0.30086
Kmt2e	1643.24	-0.20341	0.0948418	-2.14473	0.0319742	0.30086
Map1a	3319.99	0.258123	0.119729	2.1559	0.0310915	0.30086
Mapre3	336.136	0.398925	0.183258	2.17685	0.0294917	0.30086
Myo18a	372.356	0.299869	0.136772	2.19248	0.0283449	0.30086
Ndel1	254.673	-0.343295	0.159161	-2.15691	0.0310128	0.30086
Ndufa7	301.023	-0.203235	0.0920433	-2.20804	0.0272416	0.30086
Nr2c2	588.897	0.226262	0.104907	2.1568	0.0310214	0.30086
Nudt3	1025.92	-0.323589	0.14674	-2.20518	0.0274413	0.30086
Pafah1b2	441.469	-0.215023	0.100149	-2.14704	0.0317904	0.30086
Pdap1	463.964	0.21007	0.0966195	2.1742	0.02969	0.30086
Rpl23	340.925	-0.390652	0.179335	-2.17833	0.0293812	0.30086
Rps21	1681.5	-0.261857	0.121083	-2.16263	0.0305695	0.30086
Rsl1d1	271.672	-0.280707	0.130403	-2.15261	0.0313491	0.30086
Sirpa	519.454	-0.38595	0.174689	-2.20935	0.0271502	0.30086
Syt2	1345.08	0.241015	0.109645	2.19814	0.0279388	0.30086
Tagln3	845.561	-0.361006	0.168041	-2.14832	0.0316882	0.30086
Tceb2	346.225	-0.22709	0.105804	-2.14632	0.0318472	0.30086
Tmem59	464.437	-0.368544	0.169595	-2.17309	0.0297738	0.30086
Tmem63a	277.615	0.406078	0.185944	2.18387	0.0289718	0.30086
Tomm7	536.69	-0.234797	0.108987	-2.15436	0.0312118	0.30086
Tpt1	550.892	-0.293056	0.133126	-2.20134	0.027712	0.30086
Tspan7	1198.42	-0.402401	0.187551	-2.14555	0.0319086	0.30086
Zfp664	354.81	0.224948	0.104519	2.15223	0.0313792	0.30086
Cdkn1b	497.389	-0.389674	0.181994	-2.14114	0.0322626	0.301456
Pik3r1	377.101	0.203522	0.0950812	2.14051	0.0323137	0.301456
Actb	4617.76	0.280637	0.131673	2.13132	0.0330632	0.302662
Ank1	698.835	0.24484	0.114842	2.13197	0.0330097	0.302662
Dtna	761.661	-0.176361	0.0827986	-2.13	0.0331715	0.302662
Kcnk3	533.539	0.551646	0.259141	2.12875	0.0332748	0.302662
Rnf112	746.589	-0.339313	0.159098	-2.13273	0.032947	0.302662
Rps20	779.985	0.518129	0.243263	2.12991	0.0331791	0.302662
Cacna2d2	799.943	0.423843	0.199376	2.12585	0.033516	0.302727
Kif2a	436.458	0.212066	0.099807	2.12476	0.033607	0.302727
Mag	790.949	0.283093	0.133478	2.12089	0.0339309	0.302727
Polr2c	402.442	-0.214826	0.101259	-2.12154	0.0338761	0.302727
Uhrf1bp1l	364.098	-0.264072	0.124559	-2.12005	0.0340015	0.302727
Zer1	256.811	0.257112	0.121352	2.11872	0.034114	0.302727
Cltc	1172.99	-0.201185	0.0958549	-2.09885	0.0358301	0.304911
Glo1	453.055	-0.344263	0.163563	-2.10478	0.0353108	0.304911
Gnal	418.086	0.266299	0.126753	2.10093	0.035647	0.304911
Gsk3b	1734.92	0.252685	0.119976	2.10614	0.0351923	0.304911
Hivep3	352.164	0.24681	0.117171	2.1064	0.0351696	0.304911
Nrcam	582.711	0.177896	0.0845539	2.10394	0.0353841	0.304911
Ppp2r5e	341.736	0.23228	0.110433	2.10336	0.0354344	0.304911
Rabep1	835.814	0.157958	0.0752411	2.09936	0.0357852	0.304911
Rpl27a	282.55	-0.341595	0.161608	-2.11373	0.0345381	0.304911
Slc22a17	1187.92	-0.266859	0.127204	-2.09788	0.0359153	0.304911
Slc38a1	1230.19	-0.288202	0.136982	-2.10395	0.0353831	0.304911
Stx16	270.04	-0.246916	0.117863	-2.09494	0.0361759	0.304911
Vti1b	410.307	0.224539	0.10711	2.09634	0.036052	0.304911
5330434G04Rik	471.358	0.331403	0.158741	2.0877	0.0368247	0.308002
Ptn	280.726	0.257363	0.123188	2.08919	0.0366907	0.308002
Tceal3	389.134	-0.25447	0.122116	-2.08385	0.0371741	0.309737
Rnf6	366.618	0.267029	0.128567	2.07696	0.0378052	0.313798
Flywch1	892.32	0.32826	0.158603	2.06969	0.0384811	0.317247
Rab6a	1890.7	-0.248922	0.120289	-2.06937	0.0385115	0.317247
Osbpl1a	778.774	0.206797	0.100021	2.06753	0.0386842	0.317472
Baz2a	305.939	0.285914	0.138868	2.05889	0.0395047	0.319926
Cd63	741.258	-0.28732	0.139362	-2.06168	0.039238	0.319926
Rps16	467.667	-0.230493	0.111974	-2.05845	0.0395473	0.319926
Thsd7a	263.711	0.308407	0.149842	2.05822	0.0395694	0.319926
Dot1l	659.832	-0.286513	0.13936	-2.05592	0.0397902	0.320524
Aamp	524.463	-0.248712	0.121558	-2.04603	0.040753	0.323957
Aco2	851.679	-0.3117	0.152592	-2.04271	0.0410812	0.323957
Cox7b	801.54	-0.408305	0.199843	-2.04312	0.0410401	0.323957
Mtch2	581.721	-0.235182	0.115147	-2.04245	0.0411068	0.323957
Sf3b2	1208.39	0.21309	0.104318	2.0427	0.041082	0.323957
Wdr43	273.768	0.252586	0.123341	2.04786	0.0405736	0.323957
1700020I14Rik	1751.87	0.178884	0.0877299	2.03903	0.0414473	0.325466
Pebp1	597.61	0.385396	0.189226	2.03669	0.041681	0.326128
Cox5b	335.914	-0.196178	0.0967654	-2.02736	0.0426258	0.327648
Ddx24	1290.61	0.188592	0.0929725	2.02847	0.0425126	0.327648
Psmd4	715.153	0.300074	0.147945	2.02828	0.0425318	0.327648
Ran	467.186	-0.218786	0.107755	-2.03041	0.0423152	0.327648
Rnf208	674.489	0.323212	0.159379	2.02794	0.0425664	0.327648
Camk1d	295.96	0.334047	0.165655	2.01652	0.0437456	0.330389
Ccdc136	359.317	0.254931	0.12664	2.01303	0.0441113	0.330389
Cox5a	1026.78	-0.256831	0.127372	-2.01638	0.0437599	0.330389
Cpeb3	425.267	0.239514	0.118877	2.01481	0.0439248	0.330389
Gja1	377.61	-0.28316	0.140104	-2.02107	0.0432727	0.330389
Klf9	1715.88	-0.250175	0.124326	-2.01225	0.0441931	0.330389
Nell2	349.306	0.195369	0.0967051	2.02025	0.0433571	0.330389
Sf1	477.096	-0.333178	0.165355	-2.01493	0.043912	0.330389
Caprin1	357.532	0.169578	0.0845556	2.00552	0.0449077	0.332545
Ivns1abp	370.297	-0.199249	0.0993584	-2.00535	0.0449253	0.332545
Timm8b	405.268	-0.379629	0.189319	-2.00523	0.0449384	0.332545
Ccnt2	339.078	-0.267151	0.134142	-1.99155	0.0464204	0.333341
Dnajc8	558.247	0.197723	0.0991392	1.9944	0.0461085	0.333341
Grb2	466.189	-0.179526	0.090108	-1.99235	0.0463332	0.333341
Grin2c	510.423	-0.436826	0.219154	-1.99324	0.0462353	0.333341
Idh3b	441.674	-0.31486	0.157611	-1.9977	0.045749	0.333341
Nr1d2	433.202	-0.242565	0.121461	-1.99707	0.0458179	0.333341
Pou2f1	287.13	-0.288567	0.144536	-1.99652	0.0458779	0.333341
Ppp2r2d	292.401	0.203558	0.101919	1.99725	0.0457982	0.333341
Sepp1	477.816	-0.292473	0.146304	-1.99908	0.0455997	0.333341
Chordc1	263.289	-0.203766	0.102551	-1.98697	0.0469252	0.335351
Kdelr1	258.261	-0.230362	0.115979	-1.98623	0.0470076	0.335351
Atp6v1b2	1838.82	-0.290676	0.146539	-1.98361	0.0472997	0.336336
Gabrg2	335.308	-0.1649	0.0832972	-1.97966	0.0477422	0.338381
Sptbn1	2201.85	0.188823	0.0956349	1.97442	0.0483344	0.340564
Wnk1	1013.52	0.112133	0.0568003	1.97417	0.0483623	0.340564
Anapc5	278.078	0.367063	0.186299	1.97029	0.0488049	0.341478
Cstf2	482.184	0.256274	0.129984	1.97158	0.0486574	0.341478
Apbb1	441.69	0.303132	0.154352	1.9639	0.0495411	0.343172
Cdc42ep4	294.388	-0.512003	0.262398	-1.95125	0.0510278	0.343172
Hnrnpk	710.35	-0.19973	0.102282	-1.95273	0.0508517	0.343172
Hspa5	1860.8	-0.279601	0.142171	-1.96665	0.0492233	0.343172
Marcks	471.263	-0.363512	0.185856	-1.95588	0.050479	0.343172
Mtus2	498.168	-0.171677	0.0877215	-1.95707	0.0503397	0.343172
Nfic	1119.08	0.178565	0.0911462	1.9591	0.0501008	0.343172
Nrd1	347.633	0.255633	0.130313	1.96168	0.0498	0.343172
Pomp	1069.17	-0.425525	0.217863	-1.95318	0.0507984	0.343172
Ppfia4	527.237	0.685161	0.350248	1.95621	0.0504399	0.343172
Stk39	316.853	0.243886	0.124354	1.96123	0.0498527	0.343172
Trp53bp1	256.8	-0.183366	0.0939417	-1.95191	0.0509484	0.343172
Usp46	292.227	-0.191225	0.0980281	-1.95072	0.0510907	0.343172
Dync1h1	1565.15	0.3831	0.196974	1.94493	0.0517835	0.344304
Glul	3534.5	-0.237685	0.122263	-1.94404	0.0518901	0.344304
Mllt6	431.992	-0.145969	0.0750195	-1.94574	0.0516857	0.344304
Mt2	1621.26	-0.32644	0.167723	-1.9463	0.0516186	0.344304
Acsbg1	403.916	-0.18842	0.0971565	-1.93935	0.0524588	0.347023
Fnbp1	612.64	-0.222991	0.115112	-1.93716	0.0527258	0.347735
Atp1a3	1283.42	0.179297	0.0928475	1.93109	0.0534717	0.348444
Dync1li1	376.935	-0.253868	0.131392	-1.93214	0.053342	0.348444
Rps29	430.218	-0.301137	0.155816	-1.93265	0.0532798	0.348444
Ssr1	361.567	0.15068	0.0779831	1.93221	0.0533336	0.348444
Slc4a3	307.632	0.274578	0.142492	1.92698	0.0539827	0.349274
Zfp318	316.68	0.170332	0.0884289	1.9262	0.054079	0.349274
mt-Co2	13247.8	-0.336027	0.174355	-1.92726	0.0539473	0.349274
Pja2	1322.98	0.192074	0.0998932	1.9228	0.0545053	0.350989
Fth1	3375.25	-0.273247	0.142247	-1.92094	0.0547396	0.351104
Map6	324.469	0.235133	0.122459	1.9201	0.0548449	0.351104
Ckmt1	425.738	0.302186	0.157785	1.91518	0.05547	0.352009
Metrn	293.899	0.405825	0.211685	1.91712	0.0552226	0.352009
Ppp2r4	385.177	0.356962	0.18638	1.91524	0.0554615	0.352009
Prkcb	1280.9	-0.202538	0.105855	-1.91336	0.0557024	0.352459
Limch1	424.261	0.178133	0.0932871	1.90951	0.0561966	0.354558
Acbd3	299.299	0.163432	0.0857012	1.90699	0.0565213	0.35558
Ap1s2	436.187	0.22913	0.120495	1.90157	0.0572276	0.358745
Kmt2c	753.272	-0.202687	0.106713	-1.89936	0.0575175	0.358745
Npepps	797.59	-0.16697	0.087864	-1.90032	0.0573915	0.358745
Appl2	458.5	-0.253778	0.1338	-1.8967	0.057867	0.359896
Add1	380.516	-0.182429	0.096776	-1.88506	0.0594216	0.36133
Atp6v0b	520.705	0.332972	0.176612	1.88533	0.0593855	0.36133
Ccdc92	393.802	-0.186701	0.0989669	-1.8865	0.0592275	0.36133
Cds1	378.108	-0.249905	0.132098	-1.89181	0.0585162	0.36133
Erp29	285.326	-0.205625	0.108637	-1.89278	0.0583874	0.36133
Prdx1	412.303	-0.276456	0.146523	-1.88678	0.0591894	0.36133
Sh3bp5	401.176	-0.216566	0.114676	-1.88851	0.0589579	0.36133
Syt13	288.718	-0.240549	0.127452	-1.88737	0.059111	0.36133
Gm10059	338.846	-0.329836	0.175325	-1.88128	0.0599335	0.36343
Epb4,1l1	1409.3	0.29005	0.154411	1.87843	0.0603229	0.364778
Cit	854.797	0.17556	0.0944616	1.85854	0.0630927	0.365025
Cs	313.049	-0.33523	0.180075	-1.86161	0.0626578	0.365025
Efcab14	347.978	0.154324	0.0829824	1.85972	0.0629249	0.365025
Fam69b	415.487	-0.220387	0.118057	-1.86679	0.0619312	0.365025
Gpr37l1	1009.7	-0.205994	0.110771	-1.85964	0.0629361	0.365025
Irf2bpl	253.829	-0.221195	0.119142	-1.85656	0.0633735	0.365025
Jade1	255.466	-0.17908	0.0955765	-1.87368	0.0609745	0.365025
Kif3b	365.451	0.243901	0.129998	1.87618	0.0606302	0.365025
Ldhb	528.883	-0.200161	0.107076	-1.86933	0.0615767	0.365025
Map2k7	276.931	0.224849	0.121042	1.85761	0.0632239	0.365025
Mical2	319.261	-0.239301	0.128739	-1.85882	0.0630531	0.365025
Napb	1696.36	0.192728	0.103231	1.86696	0.0619072	0.365025
Ndufa3	446.94	-0.208659	0.111865	-1.86528	0.0621428	0.365025
Ndufa4	304.453	-0.42517	0.228677	-1.85926	0.0629898	0.365025
Ndufb5	774.401	-0.279654	0.150232	-1.86148	0.0626768	0.365025
Phyhip	446.506	0.481114	0.256857	1.87308	0.0610571	0.365025
Plekhb1	479.882	-0.278234	0.149813	-1.85721	0.0632816	0.365025
Trp53inp2	313.928	-0.398071	0.213504	-1.86446	0.0622572	0.365025
2610507B11Rik	444.574	-0.210452	0.113747	-1.85017	0.0642886	0.365474
Adora1	624.959	-0.196189	0.106016	-1.85056	0.0642333	0.365474
Itm2b	1624.79	-0.245702	0.132546	-1.85371	0.0637809	0.365474
Oaz2	563.854	0.536553	0.289805	1.85143	0.0641077	0.365474
Pcsk1n	701.637	0.276354	0.149106	1.85341	0.0638234	0.365474
Chd9	609.689	0.223219	0.120915	1.84609	0.0648797	0.367876
Actn4	262.228	-0.264383	0.14416	-1.83395	0.0666616	0.376058
Dkc1	371.742	0.300112	0.16381	1.83207	0.0669411	0.376058
Gnaq	620.888	-0.211667	0.115534	-1.83208	0.0669396	0.376058
Gpr162	402.339	0.354837	0.194341	1.82585	0.0678731	0.376058
Nap1l4	451.367	-0.172837	0.0945133	-1.82871	0.0674433	0.376058
Prdm2	298.379	0.249888	0.136655	1.82861	0.0674585	0.376058
Rab7	354.967	0.190493	0.104219	1.82782	0.0675765	0.376058
Ube2e3	289.515	-0.237724	0.130097	-1.82728	0.0676582	0.376058
Ube2q1	258.779	-0.205036	0.112293	-1.8259	0.0678648	0.376058
Fam126b	997.563	-0.162648	0.0892095	-1.82321	0.0682717	0.377309
Coro2b	445.168	-0.293804	0.161664	-1.81737	0.0691599	0.37744
Prkar1a	1702.93	-0.232702	0.1279	-1.8194	0.0688511	0.37744
Rpl37	1671.9	-0.219839	0.120889	-1.81852	0.0689842	0.37744
Syp	454.869	-0.237862	0.130827	-1.81815	0.0690411	0.37744
Tardbp	377.232	-0.23712	0.130411	-1.81826	0.0690249	0.37744
Mapk8ip3	322.647	0.29726	0.163789	1.8149	0.0695393	0.377878
Osbp2	561.181	0.339397	0.187037	1.81459	0.0695862	0.377878
Tmem184c	324.035	0.209043	0.115335	1.81249	0.0699104	0.378696
Lpcat1	290.303	0.294307	0.162587	1.81015	0.0702732	0.378781
Sipa1l1	340.495	0.236486	0.130622	1.81046	0.0702249	0.378781
Arpc5l	461.987	-0.208976	0.115881	-1.80337	0.0713306	0.379708
Atp6v0e2	690.243	0.384277	0.213209	1.80235	0.071491	0.379708
Cacna1e	288.321	0.239564	0.133058	1.80045	0.0717891	0.379708
Mxd4	443.934	-0.228815	0.127078	-1.80059	0.0717671	0.379708
Nrip3	530.689	0.188657	0.104863	1.79908	0.0720056	0.379708
Psmd7	449.777	0.143584	0.0795721	1.80446	0.0711596	0.379708
Rims1	1111.63	0.28104	0.156311	1.79795	0.0721845	0.379708
Rrbp1	313.539	0.212619	0.117809	1.80477	0.0711111	0.379708
Tspyl1	516.304	-0.289049	0.16018	-1.80452	0.0711497	0.379708
Uchl1	965.827	0.452296	0.251511	1.79831	0.0721272	0.379708
Uqcr10	497.788	-0.2649	0.147451	-1.79653	0.0724105	0.379981
Atp5h	348.103	-0.339374	0.189081	-1.79486	0.0726758	0.380459
Abcc5	322.585	-0.179283	0.100301	-1.78745	0.0738641	0.384834
Atp6v1a	1973.53	-0.156042	0.0872567	-1.78831	0.0737252	0.384834
Akt1	351.359	-0.313602	0.17647	-1.77709	0.0755539	0.387714
Capns1	471.785	0.270738	0.152814	1.77169	0.0764464	0.387714
Eif1b	724.332	-0.223107	0.126131	-1.76884	0.0769198	0.387714
Garnl3	352.37	-0.293579	0.165472	-1.77419	0.0760311	0.387714
Kpna1	290.714	0.155355	0.0876272	1.77291	0.076244	0.387714
Meg3	33600.5	0.233593	0.131266	1.77955	0.0751499	0.387714
Mfhas1	307.21	0.245683	0.138993	1.76759	0.0771287	0.387714
Myh10	883.037	0.232248	0.131093	1.77162	0.0764574	0.387714
Nbr1	264.88	-0.283035	0.159654	-1.77281	0.0762609	0.387714
Pnmal2	1313.71	0.247785	0.140036	1.76944	0.0768202	0.387714
Rps5	611.619	-0.221208	0.125201	-1.76682	0.0772587	0.387714
Slc24a3	564.761	0.195188	0.110251	1.77039	0.0766629	0.387714
Srgap3	1096.09	0.232204	0.131284	1.76871	0.0769415	0.387714
Sult4a1	868.293	-0.355299	0.199866	-1.77769	0.0754551	0.387714
Trip12	532.165	0.17528	0.0991582	1.76768	0.077115	0.387714
Vdac1	1056.35	-0.216363	0.122446	-1.76701	0.0772261	0.387714
Atp6v1e1	967.535	-0.119169	0.0676405	-1.7618	0.0781031	0.390158
Gm28437	259.945	0.583031	0.330743	1.76279	0.0779353	0.390158
Rpl22l1	285.378	-0.274402	0.1561	-1.75786	0.0787722	0.391708
mt-Rnr2	201027	0.320782	0.182433	1.75835	0.0786872	0.391708
Tial1	292.324	-0.214837	0.122453	-1.75445	0.0793534	0.393701
Akap6	453.979	0.234419	0.134218	1.74656	0.080714	0.398024
Ptch1	313.224	-0.282301	0.161653	-1.74634	0.0807515	0.398024
Smap2	335.519	0.140544	0.0805236	1.74537	0.0809205	0.398024
St3gal5	276.023	-0.336989	0.193097	-1.74518	0.0809541	0.398024
Napa	284.004	-0.159773	0.0918168	-1.74013	0.0818369	0.399664
Stmn2	2648.57	-0.154793	0.0888515	-1.74215	0.0814824	0.399664
Zcchc24	257.222	-0.204326	0.117368	-1.74091	0.0817	0.399664
Tuba1a	1686.82	-0.248434	0.142929	-1.73816	0.0821821	0.400455
Agap1	938.339	0.149119	0.0861133	1.73166	0.0833339	0.401875
Ank2	2096.71	0.232457	0.134984	1.72211	0.0850493	0.401875
Banp	277.171	-0.235304	0.135901	-1.73144	0.083374	0.401875
Cfl1	464.492	-0.309658	0.180989	-1.71092	0.0870962	0.401875
Chmp5	424.274	-0.299656	0.175693	-1.70556	0.0880894	0.401875
Cygb	595.531	0.343452	0.201713	1.70267	0.0886292	0.401875
Dab2ip	645.539	0.258491	0.151864	1.70212	0.0887329	0.401875
Dnm1l	345.024	0.135496	0.0791859	1.71112	0.0870597	0.401875
Eapp	286.211	0.152512	0.08895	1.71458	0.0864216	0.401875
Itm2c	1188.71	-0.395608	0.231445	-1.70929	0.0873967	0.401875
Map1lc3b	566.501	-0.261044	0.151284	-1.72552	0.084434	0.401875
Mff	322.664	-0.230485	0.134422	-1.71464	0.0864121	0.401875
Mtpn	310.575	-0.140732	0.0824476	-1.70693	0.0878355	0.401875
Myeov2	541.348	-0.242074	0.142132	-1.70316	0.0885372	0.401875
Ndufa12	314.825	0.340451	0.199912	1.703	0.0885672	0.401875
Prpf39	269.492	-0.180253	0.104866	-1.7189	0.0856331	0.401875
Prpf8	258.772	-0.170398	0.0986637	-1.72706	0.0841571	0.401875
Psmd8	392.84	-0.205147	0.120453	-1.70314	0.0885424	0.401875
Ralgps2	276.01	0.184601	0.10751	1.71705	0.0859692	0.401875
Romo1	328.304	-0.237654	0.138055	-1.72144	0.0851718	0.401875
Scd1	302.919	0.232072	0.135948	1.70707	0.0878093	0.401875
Scg3	904.165	0.140437	0.0821054	1.71045	0.0871821	0.401875
Selk	386.461	-0.208347	0.121194	-1.71912	0.0855927	0.401875
Smc1a	900.461	0.15056	0.0882735	1.7056	0.088082	0.401875
Sorl1	1183.12	-0.225902	0.130367	-1.73282	0.0831279	0.401875
Srek1	335.476	0.139553	0.081671	1.70872	0.0875021	0.401875
Srsf3	486.295	-0.181424	0.104675	-1.73321	0.0830582	0.401875
Stat3	267.271	-0.210309	0.122448	-1.71753	0.0858828	0.401875
Tmed9	354.771	-0.251855	0.147116	-1.71195	0.0869056	0.401875
Tmem59l	266.676	-0.264943	0.155408	-1.70482	0.0882287	0.401875
Trim35	285.865	-0.240367	0.141158	-1.70282	0.0886021	0.401875
Ttyh1	1033.21	-0.24897	0.144052	-1.72833	0.0839289	0.401875
Ywhab	1901.22	0.150614	0.0882298	1.70707	0.0878089	0.401875
Zfp644	1091.86	0.186315	0.108201	1.72193	0.0850813	0.401875
Ppp3r1	1568.46	-0.223228	0.131365	-1.6993	0.0892628	0.402092
Rap1gap2	271.878	-0.349614	0.205887	-1.69809	0.0894911	0.402092
Tprgl	368.003	-0.16885	0.0994434	-1.69795	0.0895169	0.402092
Ubr4	713.326	0.183662	0.108167	1.69795	0.0895174	0.402092
Csde1	1364.65	-0.110576	0.0652082	-1.69574	0.0899357	0.403141
Hmgn1	282.153	0.203728	0.120358	1.69268	0.0905159	0.403258
Nrip1	368.306	0.222533	0.131463	1.69275	0.0905033	0.403258
Plekhm2	322.898	0.176613	0.104267	1.69385	0.0902936	0.403258
Cadps	319.419	0.239168	0.141922	1.68521	0.0919478	0.404586
Epb4,1	454.221	0.291919	0.173311	1.68436	0.0921115	0.404586
Nav1	325.853	0.245486	0.145636	1.68562	0.0918696	0.404586
S100a1	271.583	0.326511	0.193581	1.68669	0.0916629	0.404586
Scn2a1	1368.09	0.227154	0.134585	1.68781	0.0914469	0.404586
Sf3b1	651.323	-0.175737	0.103991	-1.68993	0.091042	0.404586
Sh3gl2	1386.6	0.254675	0.150869	1.68805	0.091401	0.404586
[truncated: 24,098 more rows]

## Sheet: TS_U_vs_WT_T
Gene	baseMean	log2FoldChange	lfcSE	stat	pvalue	padj
[truncated: 24,004 more rows]

## Sheet: TS_U_vs_TS_T
Gene	baseMean	log2FoldChange	lfcSE	stat	pvalue	padj
[truncated: 23,654 more rows]
